# Supplementary material
Source: publisher figshare collection journal article supplement (https://sage.figshare.com/ndownloader/files/24995266)
Supplement: Supplementary file 1 [file 24995266]

***USPEW1999-MILLENNIUM***

**Country:** United States  
**Title:** Pew Research Center Poll: 1999 Millennium  
**Survey Organization:** Princeton Survey Research Associates  
**Sponsor:** Pew Research Center for the People & the Press  
**Field Dates:** April 6-May 6, 1999  
**Sample:** National adult  
**Sample Size:** 1,546  
**Sample Notes:**  
**Interview method:** Telephone  
**Weight Location:** Card 8; Columns 71-74 (xx.xx)  
**No. of records per respondent:** 8  
**Usage Notes:**

**Please note that data purchased from The Roper Center for Public Opinion Research may not be redisseminated without written permission. The results of any analyses conducted on the data may, however, be published with appropriate acknowledgments and source citation.**

PEW RESEARCH CENTER FOR THE PEOPLE & THE PRESS  
1999 MILLENNIUM SURVEY #1

Hello, I am \_\_\_\_\_ calling for Princeton Survey Research Associates in Princeton, New Jersey. We are conducting a telephone opinion survey for leading newspapers and TV stations around the country. I'd like to ask a few questions of the youngest male, 18 years of age or older, who is now at home. **[IF NO MALE, ASK: May I please speak with the oldest female, 18 years of age or older, who is now at home?]**

First, I'm going to ask you a few questions about the past...

Q.1 Compared to members of your family in the 1950s, would you say your life today is generally better, worse, or about the same?*{new}*

- |   |                                       |        |
|---|---------------------------------------|--------|
| 1 | Better                                | (1/62) |
| 2 | Worse                                 |        |
| 3 | About the same — <b>GO TO Q.3</b>     |        |
| 9 | Don't know/Refused — <b>GO TO Q.3</b> |        |

Q.2 In what ways is your life (**INSERT RESPONSE FROM Q.1: better/worse**) compared to members of your family in the 1950s? (**OPEN-END; PROBE FOR ADDITIONAL RESPONSES**) *{new}*

(1/64-65, 66-67, 68-69, 70-71, 72-73)

Q2. In what ways is your life **better** compared to members of your family in the 1950s?

01. More opportunities

Freedom/Equal Rights

- 10. Equal rights
- 11. Have more freedom
- 12. More opportunities for women/minorities
- 13. Less racism/prejudice

Education

- 21. Better education/More educated
- 22. More educational opportunities

Medical Advances

- 31. Better medical/health care
- 32. Longer life span
- 33. Better health

#### Economy/Jobs

- 41. Better off financially/prosperous/two incomes
- 42. Financially secure
- 43. Able to retire
- 44. Better pay/higher earnings/better job
- 45. More career/job opportunities
- 46. Better economy
- 47. Own our own home
- 86. Better standard of living/quality of life

#### Technology

- 51. Technology
  - 52. Computer
  - 53. The Internet
  - 54. Communication
60. Better communication (general)(If this is specific to technology put it under that net, otherwise this should stand-alone)

#### Modern Conveniences

- 71. Better housing/better living conditions
  - 72. More material goods
  - 73. More opportunities for travel
  - 74. Appliances/conveniences
  - 75. Color TV/Air-conditioning/Cell phone
  - 76. Better transportation
- 
- 81. Retired
  - 82. More leisure time
  - 83. Happier/Peace of mind
  - 84. Easier
  - 85. No war
  - 96. Personal comment
  - 97. Everything is better/Just better
  - 98. Other
  - 99. Don't know

Q. 2 In what ways is your life **worse** compared to members of your family in the 1950s?

Pace of Life

- 01. More hectic/complicated/rushed/stressful
- 02. Lack of private/leisure time

Personal Issues

- 11. Loved ones are dead
- 12. Family is not as close

Economy/Jobs

- 21. Job/Lack of job security
- 22. Worse off financially
- 23. Both spouses need to work
- 24. Cost of living/inflation/everything is expensive
- 25. Unemployment
- 26. Taxes

Moral Breakdown

more crime/violence/vandalism (pre and post Littleton) SUBNET (codes 31 & 37)

- 31. More crime/violence/vandalism (pre Littleton)
- 32. Drugs
- 33. Less discipline
- 34. Lack of religious faith
- 35. Society lacks values/morals/ethics
- 36. People who don't work for what they get
- 37. More crime/violence/vandalism (post Littleton)
- 13. Single parent families
  
- 40. Less peace
- 50. Health problems
- 96. Just worse/harder
- 97. Liked it better then/the way things were
- 98. Other
- 99. Don't know

**ASK ALL:**

Q.3 Now, thinking about life in the U.S... Since the 1950s, would you say life in the U.S. has gotten better, gotten worse or stayed about the same? *{new}*

- |   |                                       |        |
|---|---------------------------------------|--------|
| 1 | Gotten better                         | (1/74) |
| 2 | Gotten worse                          |        |
| 3 | Stayed the same — <b>GO TO Q.5</b>    |        |
| 9 | Don't know/Refused — <b>GO TO Q.5</b> |        |

Q.4 In what ways has life in the U.S. gotten **(INSERT RESPONSE FROM Q.3: better/worse)? (OPEN-END; PROBE FOR ADDITIONAL RESPONSES)** *{new}*

(2/7-8, 9-10, 11-12, 13-14)

Q. 4 In what ways has life in the U.S. gotten **better**?

Freedom/Civil Rights

- 01. More freedom/rights
- 02. Equal rights
- 03. Civil rights/race relations/integration
- 04. Women's rights
- 05. People are more open-minded/tolerant/less prejudice

Economy/Jobs

- 11. Financially/more money
- 12. Higher/better standard of living
- 13. More jobs/Better paying jobs
- 14. Better/stable economy

Technology

- 21. Technology
- 22. Computers

Modern Conveniences

- 31. Materialistically
- 32. More conveniences/live more comfortably/easier
- 33. Better transportation/Travel is easier
  
- 40. Television
- 45. Better communication
- 50. More leisure time/time with family/children/friends
- 55. More opportunities/choices
- 60. More religious
- 65. More politically aware
- 70. Better education/more educational opportunities
- 75. Better health/Better medical/health care

- 80. Now retired
- 85. Life in general/Quality of life
- 90. More/healthier food
- 95. More social programs/help for the poor
- 96. Personal comment
- 98. Other
- 99. Don't know

Q.4 In what ways has life in the U.S. gotten **worse**?

#### Moral Breakdown

More crime/violence (pre and post Littleton) SUBNET (codes 01 & 10)

- 01. More crime/violence (pre Littleton)
- 02. Drugs
- 03. Lack/decline of morals/respect
- 04. Lack of family values
- 05. Breakdown of family structure/Both parents work
- 06. God is left out of everything

Misbehavior of young people (pre and post Littleton) SUBNET (codes 07 & 08)

- 07. Misbehavior of young people (pre Littleton)
- 08. Misbehavior of young people (post Littleton)
- 10. More crime/violence (post Littleton)
- 14. "Kids killing kids"
- 80. Television/See too much violence/sex

#### Government/Politics

- 11. Corruption in government
- 12. Government has too much control/too many complex regulations
- 13. Political controversy/Politics

#### Economy

- 21. Economy
- 22. Cost of living/hard to make a living
- 24. Unemployment

#### Pace of Life

- 31. More complicated/faster paced/more stress
- 32. More people/more cars/congestion
- 09. "Me" generation
- 23. More taxes
- 40. Conflicts/War/Terrorism
- 45. People less caring
- 50. More prejudice/racism
- 55. Education system/lack of discipline/control in schools

- 60. Pollution
- 65. Indigents/homeless
- 70. Too much third world immigration/foreigners/refugees
- 75. Too much technology
- 85. Mother Nature has caused turmoil
- 90. Not like it used to be
- 95. Everything/Quality of life
- 98. Other
- 99. Don't know

**ASK ALL:**

Q.5 Now I'm going to read a list of some groups of Americans. For each one, please tell me whether life has gotten better or worse since around 1950. (First,) **(INSERT ITEM; ROTATE)**, has life gotten better or worse for this group of Americans over the past 50 years? How about... *{new}*

**OBSERVE FORM DIFFERENCES.**

- |      |                         |        |
|------|-------------------------|--------|
| a.F1 | Men                     | (2/15) |
| b.F2 | White males             | (2/23) |
| c.F1 | Women                   | (2/16) |
| d.F2 | African Americans       | (2/24) |
| e.F1 | Gays and lesbians       | (2/17) |
| f.F2 | Children                | (2/25) |
| g.F1 | Senior citizens         | (2/18) |
| h.F2 | Disabled people         | (2/26) |
| i.F1 | Middle class Americans  | (2/19) |
| j.F2 | Working class Americans | (2/27) |
| k.F1 | Hispanics               | (2/20) |
| l.F2 | Religious people        | (2/28) |
| m.F1 | Farmers                 | (2/21) |
| n.F2 | Union members           | (2/29) |
| o.F1 | Teenagers               | (2/22) |

**CATEGORIES:**

- 1 Better
- 2 Worse
- 3 Same (**VOL.**)
- 9 Don't know/Refused

On a different subject...

**ASK Q.6 AND Q.7 OF FORM 1 ONLY:**

Q.6F1 What would you say has been America's greatest achievement during the 20<sup>th</sup> century?

**(OPEN-END; ACCEPT MULTIPLE RESPONSES; PROBE ONCE IF "DON'T KNOW," BUT DO NOT PROBE FOR ADDITIONAL RESPONSES)<sup>1</sup>**

(2/31-32, 33-34, 35-36, 37-38, 39-40)

Science/Technology

01. Technology
02. Science
03. Space exploration/Man on the moon
04. Computers
05. The Internet
06. Telecommunications
07. Transportation

War and Peace

11. Ending the Cold War
12. Winning World War II
13. Peace
14. Nuclear bomb
15. Dominant world power
16. Disarmament/end of nuclear race

Civil Rights

21. Civil rights
22. Women's rights
23. Gay and lesbian rights

Economy

31. Economic well being/stability
32. The standard of living
33. Jobs
34. People own their own homes

Medical Advances

41. Medical care/break-throughs
42. Polio vaccine



- 50. Helping other countries/peoples
- 55. Continuation/spread of democracy/freedom
- 60. Heightened awareness of social/environmental issues
- 65. Social support system
- 70. Education
- 75. Industrial revolution
- 97. Nothing
- 98. Other
- 99. Don't know

**Q.7F1 And what would you say has been America's greatest failure during the 20<sup>th</sup> Century?  
(OPEN-END; ACCEPT MULTIPLE RESPONSES; PROBE ONCE IF "DON'T KNOW," BUT DO NOT PROBE FOR ADDITIONAL RESPONSES)**

(2/42-43, 44-45, 46-47, 48-49, 50-51)

#### Moral Breakdown

Our children/kids (pre and post Littleton) SUBNET codes (01 & 03)

- 01. Our children/kids (pre Littleton)
- 02. Breakdown of the family/family unit
- 03. Our children/kids (post Littleton)

Moral decline/Lack of values/ethics (pre and post Little) SUBNET (codes 70 & 71)

- 70. Moral decline/Lack of values/ethics (pre Littleton)
- 71. Moral decline/Lack of values/ethics (post Littleton)
- 90. Lack of religious values/Removal of God

#### Rich and Poor

- 11. Care for the poor/homeless
- 12. Not closing the gap between rich and poor/poverty
- 13. Not helping/taking care of our own

#### War/Use of Force

- 21. Use of power/influence on the rest of the world
- 22. Foreign policy
- 23. Wars/world policing efforts
- 24. Vietnam
- 25. Gulf War

#### Crime/Justice System

- 31. War on drugs/gangs
  - 32. Justice system
- Crime/violence (pre and post Littleton) SUBNET (codes 33 & 34)
- 33. Crime/violence (pre Littleton)
  - 34. Crime/violence (post Littleton)

#### Politics/Government

41. Government corruption/Trust in government
42. Our President/leaders
43. Politics/Politicians

Specific Policy Issue

51. Environmental issues/pollution
52. Health care
53. Legalized abortion
54. Education
55. Social Security
56. Immigration
57. Welfare
  
60. Elderly/aged
65. Treatment of minorities/intolerance
75. Too much consumerism/materialism
80. Unemployment
82. Health problems
85. Challenger
95. Treatment of our farmers
98. Other
99. Don't know

**ASK Q.8 AND Q.9 OF FORM 2 ONLY:**

On a different subject...

Q.8F2 What would you say has been the U.S. government's greatest achievement during the 20<sup>th</sup> Century? (**OPEN-END; ACCEPT MULTIPLE RESPONSES; PROBE ONCE IF "DON'T KNOW," BUT DO NOT PROBE FOR ADDITIONAL RESPONSES**)

(2/53-54)

Science/Technology

01. Space program
02. Technology
03. Science
04. Computers

Social Safety Net

11. Social Security
12. Help for the aged/Senior Citizens
13. Public assistance/welfare/work first
14. Help for needy individuals

Economy/Jobs

21. Maintaining a stable economy

- 22. More/better jobs/Lower unemployment
- 23. Higher pay/minimum wage

#### Freedom/Civil Rights

- 31. Freedom/liberty
- 32. Equal rights
- 33. Civil rights/ending segregation
- 34. Women's rights
- 35. A more equal society

#### World Peace

- 41. Peace
- 42. Diplomacy
- 43. End of the cold war
- 44. Winning World War II
- 45. World Power

- 50. Medical/health care advances
- 55. Education/educational opportunities
- 60. Balancing the budget/Lowering the debt
- 96. Everything has improved/Quality of life
- 97. Nothing
- 98. Other
- 99. Don't know

Q.9F2 And what would you say has been the U.S. government's greatest failure during the 20<sup>th</sup> Century? (**OPEN-END; ACCEPT MULTIPLE RESPONSES; PROBE ONCE IF "DON'T KNOW," BUT DO NOT PROBE FOR ADDITIONAL RESPONSES**)

(2/64-65, 66-67, 68-69, 70-71, 72-73)

Caring for Those in Need

- 01. Care for the elderly/aged
- 02. Care for the poor/homeless
- 03. Care of veterans

Environment/Natural Resources

- 11. Environmental issues/pollution
- 12. Ability to preserve natural resources

War/Foreign Policy

- 21. Foreign policy
- 22. Wars/world policing efforts
- 23. Vietnam
- 24. Persian Gulf
- 25. Korean War
- 26. Cold War

Civil Rights

- 31. Civil rights/race relations
- 32. Equal rights
- 33. Women's rights

Specific Policy Issue

- 41. Health care/insurance
- 42. Education
- 44. Welfare/creating dependency on the government
- 45. Social Security
- 46. Immigration
- 47. Legalized abortion
- 48. Domestic policy/issues - non specific

Crime/Justice System

- 51. War on drugs
  - Crime/violence (pre and post Littleton) SUBNET (codes 52 & 53)
- 52. Crime/violence (pre Littleton)
- 53. Crime/violence (post Littleton)
- 54. Justice system

#### Politics/Government

- 61. Trust in government/Failure to keep their word/Dishonesty in politics
- 62. Our President/Clinton's lack of morals/ethics/Scandal
- 63. Watergate/Nixon
- 64. Government has gotten too big

#### Budget/Fiscal Policy

- 71. Reaganomics
- 72. US deficit/Budget/Money management
- 73. Taxes

#### Economy/Jobs

- 81. Unemployment
- 82. Cost of living
- 83. Economy

#### Moral Breakdown

- 88. Taking prayer/religion out of schools/life
- 90. Moral decay
  
- 85. Meeting the needs of the people
- 86. Lack of support for families/parents/children
- 96. Everything/Many things
- 97. Nothing
- 98. Other
- 99. Don't know

#### **NO QUESTION 10**

**ASK ALL:**

**Q.11** Now I'm going to ask you about some things that have happened in the U.S. and around the world over the last 50 years or so. For each event, please tell me if you happen to remember EXACTLY where you were or what you were doing the MOMENT you heard the news. Just tell me "yes" if you do remember this and "no" if you do not. If you were not old enough at the time to remember, just say so and we'll move on. First, do you happen to remember exactly where you were or what you were doing the moment you heard about... **(READ IN ORDER; IF RESPONDENT VOLUNTEERS THAT HE OR SHE WASN'T BORN OR WASN'T OLD ENOUGH TO REMEMBER AN EVENT, END THE SERIES AND GO TO THE NEXT QUESTION — Q.12. IF RESPONDENT ANSWERS "DON'T KNOW" GO TO THE NEXT ITEM IN THE SERIES — Q.11.)** How about...

- |    |                                                                  |        |
|----|------------------------------------------------------------------|--------|
| a. | The death of Princess Diana                                      | (2/74) |
| b. | The Oklahoma City bombing                                        | (2/75) |
| c. | The beginning of the bombing in the Persian Gulf War             | (2/76) |
| d. | The fall of the Berlin Wall                                      | (2/77) |
| e. | The Tiananmen Square massacre                                    | (2/78) |
| f. | The Challenger explosion                                         | (3/7)  |
| g. | John Hinkley shooting President Reagan                           | (3/8)  |
| h. | Richard Nixon's resignation                                      | (3/9)  |
| i. | Neil Armstrong walking on the moon                               | (3/10) |
| j. | Martin Luther King's assassination                               | (3/11) |
| k. | John F. Kennedy's assassination                                  | (3/12) |
| l. | North Korea's invasion of South Korea which began the Korean war | (3/13) |
| m. | The end of World War II                                          | (3/14) |
| n. | Franklin Roosevelt's death                                       | (3/15) |
| o. | The attack on Pearl Harbor                                       | (3/16) |
| p. | Paris falling to the Nazis                                       | (3/17) |
| q. | The stock market crash of 1929                                   | (3/18) |

**CATEGORIES:**

- |   |                                                    |
|---|----------------------------------------------------|
| 1 | Yes, remember where they were/what they were doing |
| 2 | No, don't remember                                 |
| 3 | Not old enough/Not born <b>(VOL.)</b>              |
| 9 | Don't know/Refused                                 |

- Q.12 I'm going to read a list of some changes that have taken place over the last 100 years. Please tell me if you think each one has been a change for the better, a change for the worse, or hasn't made much difference. (First,) Has **(INSERT ITEM; ROTATE)** been a change for the better, a change for the worse, or hasn't this made much difference?  
*{new}* How about...

**OBSERVE FORM DIFFERENCES:**

|      |                                    |        |
|------|------------------------------------|--------|
| a.F1 | The invention of the computer      | (3/19) |
| b.F2 | The development of nuclear weapons | (3/28) |
| c.F1 | Space exploration                  | (3/20) |
| d.F2 | Women in the workplace             | (3/29) |
| e.F1 | Birth control pills                | (3/21) |
| f.F2 | The legalization of abortion       | (3/30) |
| g.F1 | The invention of television        | (3/22) |
| h.F2 | The invention of radio             | (3/31) |
| i.F1 | The civil rights movement          | (3/23) |
| j.F2 | The automobile                     | (3/32) |
| k.F1 | Airline travel                     | (3/24) |
| l.F2 | Wide use of credit cards           | (3/33) |
| m.F1 | The development of nuclear energy  | (3/25) |
| n.F2 | The growth of the suburbs          | (3/34) |
| o.F1 | More acceptance of divorce         | (3/26) |
| p.F2 | The interstate highway system      | (3/35) |
| q.F1 | Rock and roll                      | (3/27) |

**CATEGORIES:**

- 1 Change for the better
- 2 Change for the worse
- 3 Hasn't made much difference
- 9 Don't know/Refused

Q.13 Now thinking just about the last 10 years or so. I'm going to read another list of changes that have taken place. Please tell me if you think each one has been a change for the better, a change for the worse, or hasn't made much difference. (First,) Has **(INSERT ITEM; ROTATE)** been a change for the better, a change for the worse, or hasn't this made much difference? *{new}* How about...

**OBSERVE FORM DIFFERENCES:**

|      |                                    |        |
|------|------------------------------------|--------|
| a.F1 | HMOs and managed health care plans | (3/36) |
| b.F2 | Mutual funds                       | (3/44) |
| c.F1 | Telemarketing                      | (3/37) |
| d.F2 | Email                              | (3/45) |
| e.F1 | The Internet                       | (3/38) |
| f.F2 | Viagra                             | (3/46) |
| g.F1 | Lotteries                          | (3/39) |
| h.F2 | Rap music                          | (3/47) |
| i.F1 | The gay rights movement            | (3/40) |
| j.F2 | Home schooling                     | (3/48) |
| k.F1 | Prozac                             | (3/41) |
| l.F2 | Cellular phones                    | (3/49) |
| m.F1 | Cable TV                           | (3/42) |
| n.F2 | Fertility drugs                    | (3/50) |
| o.F1 | The cloning of sheep               | (3/43) |

**CATEGORIES:**

- 1 Change for the better
- 2 Change for the worse
- 3 Hasn't made much difference
- 9 Don't know/Refused

**ASK ALL:**

On a different subject...

Q.14 What word or phrase best describes your impression of... **(INSERT ITEM; DO NOT ROTATE) (OPEN-END)** How about the... **(INSERT NEXT ITEM) (ACCEPT MULTIPLE RESPONSES; PROBE ONCE IF "DON'T KNOW," BUT DO NOT PROBE FOR ADDITIONAL RESPONSES)**

**ASK ITEMS a THRU d OF FORM 1 ONLY:**

**a.F1 1920s** (3/52-53, 54-55, 56-57, 58-59, 60-61)

Cultural

- 01. Roaring
- 02. Flappers
- 03. Gangsters
- 04. Charleston/Dance



05. Wild/wide open
06. Prohibition
07. Speak easy/Bathtub gin
08. Bootlegging
09. Excessive/out of control/fast living
10. Swinging/gay/happy/carefree
11. Music/Jazz/Swing
12. Silly/Frivolous
13. Reference to clothes, hairstyles

#### Economic

51. Stock market/investments
52. The Crash/Stock Market Crash
53. Hard times
54. Sad/depressing
55. Depression
56. Boom to bust/Calm before storm
57. Poverty/Unemployment
58. Affluence/Booming
61. Industrial movement
65. War
71. Change
73. Awakening/Beginning
75. Inventions
77. Revolution
80. Good/Better
81. Exciting/Interesting
85. Bad
86. Slow/Boring
90. Long time ago/Nostalgia
96. Personal milestone
98. Other
99. Don't know

#### **b.F1 1930s**

(3/63-64, 65-66, 67-68, 69-70, 71-72)

#### Economy/Depression

01. Depression
02. Poverty
03. Hard times/struggle/bad
04. Stock market crash
05. Work
06. Recovery/rebuilding

#### FDR

11. Roosevelt
12. New Deal
13. WPA put people to work

#### Corruption/Crime

20. Crime/violence
21. Gangsters
22. Corrupt "Dirty thirties"
30. World War/Trouble in Europe
40. Continuation of the Industrial Revolution
50. Advances/change/progress
55. Hope
60. Best and worst
65. Simple/calm/safe
67. Depressing/sad
70. Better/Good
80. Music/Dancing
96. Personal milestone
98. Other
99. Don't know

#### **c.F1 1940s**

(3/74-75, 76-77, 4/7-8, 9-10, 11-12)

#### Economy

01. Depression over/Economy getting better/growing
02. Good times
03. Rebuilding/new beginning/optimism

#### World War II

21. World War II
22. Japan
23. Pearl Harbor
24. Frightening/unsettled/turmoil
25. Atomic bomb/Hiroshima
26. Army
27. Patriotism/air of unity
28. Hitler/Defeat of Hitler/Holocaust
29. End of the War/Winning the War

#### Cultural

31. Big Band music
32. Family life/Baby boom
40. History
50. Change

- 60. Better/getting better
- 70. Sad/terrible/bad/hard
- 96. Personal milestone
- 98. Other
- 99. Don't know

**d.F1 1950s**

(4/14-15, 16-17, 18-19, 20-21, 22-23)

Cultural

- 01. Suburbs
- 02. Raising a family/family values/baby boom
- 03. Leave It To Beaver/Apple Pie/Ozzie & Harriet
- 04. Rock N Roll/Music
- 05. Television
- 06. Good cars
- 07. Baby Boomers
- 08. James Dean
- 09. Elvis
- 10. Conservative
- 11. Cultural - other

The Good Life

- 21. Progress/Growing/Modernization
- 22. More freedom
- 23. Happy/peaceful/good life/Good
- 24. Great/Fun/Life is better than ever
- 25. Rebuilding/hopeful/optimism
- 26. Inventive/innovations

War & Peace

- 30. War
- 31. Korean War
- 32. Cold War
- 33. Berlin Wall
- 34. Nuclear
- 38. Peace

Economy

- 40. Economically/financially better off/prosperous
- 41. Better jobs/pay
- 45. Industry
- 51. Truman
- 52. Eisenhower

- 55. History
- 60. Better/Getting better
- 70. Bad/hard times
- 80. Change/transition
- 96. Personal milestone
- 98. Other
- 99. Don't know

**ASK ITEMS e THRU h OF FORM 2 ONLY:**

**e.F2 1960s**

(4/25-26, 27-28, 29-30, 31-32, 33-34)

Cultural

- 01. Rock N Roll/Music
- 02. Television
- 03. Best automobiles
- 04. Free love/Open marriage
- 05. Drugs/LSD/psychedelic
- 06. Hippies/flower children/Woodstock
- 07. Cool/Hip/Groovy/Radical
- 08. Wild/chaotic
- 09. Experimenting
- 10 "Laid back"

Space/Technology

- 11. Technology
- 12. Space exploration

- 15. Progress/Growth

Civil/Political Unrest

- 21. Civil rights movement
- 22. Civil unrest/rebellion/protests/revolution
- 23. Vietnam War/protests
- 24. Political change
- 25. Martin Luther King
- 26. Turbulent/troubled/confused
- 27. Peace movement/peace
- 29. Violence

- 31. Kennedy
- 41. Freedom/liberal
- 55. Education better/better schools
- 61. Good/Fun
- 65. Better

- 71. Bad/Hard
- 75. Change
- 96. Personal milestone
- 98. Other
- 99. Don't know

**f.F2 1970s**

(4/36-37, 38-39, 40-41, 42-43, 44-45)

Technology/Space

- 01. More technology/improvements
- 02. Space program
- 05. Inventions/Innovations

Cultural

- 11. Drugs
- 12. Free love/sexual revolution
- 13. Hippies/peace & love
- 14. Disco/Dancing
- 15. John Travolta/Saturday Night Fever
- 16. Elvis
- 17. Music
- 18. Reference to clothes/hairstyles
- 19. Cultural - other
- 42. Wild/crazy
- 55. Experimenting/redefining

Politics/Government

- 21. Politics
- 22. Watergate/Nixon
- 23. Vietnam/war/peace talks
- 25. Free/Liberal

Economy

- 30. Economy good
- 33. Inflation/High interest rates
- 35. Simpler than now
- 37. Family/raising children
- 40. Stability/calm/peaceful
- 45. Fun/good/carefree
- 47. Better/getting better
- 48. OK/pretty good/not too bad
- 50. Unsettled/confused/stressful/turmoil
- 58. Change
- 59. Awakening/(America) growing up/learning/coming into their own
- 60. Sad/bad/dull/hard

- 65. Consumer ethics
- 70. Beginning of the "me" generation/Greedy
- 75. Growth/Moving ahead
- 96. Personal milestone
- 98. Other
- 99. Don't know

**g.F2 1980s**

(4/47-48, 49-50, 51-52, 53-54, 55-56)

Science/Technology

- 00. Science
- 01. Computers
- 02. Technology
- 03. Space program

Materialism/Greed

- 11. Greed/selfish/me generation
- 12. Begin excessive spending/consumption
- 13. Consumer ethic/materialism
- 14. Yuppies

Cultural

- 21. Drugs
- 22. Health kick
- 23. Music
- 24. Big hair/bad hair
- 29. Cultural - other

Politics/Government

- 30. Government
- 31. Reagan/Reaganomics
- 32. Politics/Political change

Economics

- 41. Prosperity/good economy
- 42. Better jobs/better pay
- 43. Economy slowing down
- 44. Unemployment
- 49. Economic - other
- 35. Pride in America/Unity
- 51. Easy/peaceful/slow
- 53. Busy/hectic/confused/stressful
- 55. Good/Fun
- 57. Better/getting better

- 58. OK
- 60. World wide news/Global
- 65. Hard times/Bad
- 68. Getting worse
- 70. Growing
- 75. Change/transition

“Getting it together”

- 80. Free/liberal/progressive
- 82. Conservative
- 85. Interesting/exciting
- 96. Personal milestone
- 98. Other
- 99. Don't know

**h.F2 1990s**

(4/58-59, 60-61, 62-63, 64-65, 66-67)

Coming of Year 2000

- 01. Year 2000/Millennium
- 02. Transition to the future/looking ahead

Moral Breakdown

- 11. Lack of ethics (unless related specifically to government ethics, then would go under "Politics/Government")

No discipline for kids/permissive (pre and post Littleton) SUBNET (codes 12 & 13)

- 12. No discipline for kids/permissive (pre Littleton)
- 13. No discipline for kids/permissive (post Littleton)
- 14. Drugs

Crime/violence (pre and post Littleton) SUBNET (codes 15 & 16)

- 15. Crime/violence (pre Littleton)
- 16. Crime/violence (post Littleton)
- 17. Decline in morality/responsibility

Economy/Prosperity

- 21. More/Better jobs
- 22. Stocks & Bonds/Stock market
- 23. Prosperous time/economic boom
- 24. Difficult to make a living
- 25. Jobs/Work

Technology

- 31. Technology/"High tech"
- 32. Computers/Computerization/Computer Age
- 33. Internet/e-mail/Communication explosion
- 34. Information age

### Politics/Government

- 36. Clinton
- 37. Clinton scandal(s)
- 38. Government control/trying to take over

### Materialism/Greed

- 41. Excessive materialism
- 42. Selfish

### War/Military

- 51. War
- 53. Terrorism

- 35. Space travel
- 45. Music/Rap/Hip hop/New Wave
- 60. Stress/fast paced/complicated/Scary
- 61. Conflicts/confusion
- 63. Crazy/unpredictable/wild
- 65. Liberal/Free
- 68. Stable/calm/steady/content
- 71. Continuous improvement/momentum
- 72. OK
- 73. Good
- 75. Getting worse/Hard
- 77. Sad/despair
- 80. Tremendous change
- 81. Growth
- 82. Becoming global
- 84. Global warming
- 85. Gay rights
- 90. Retirement
- 96. Personal milestone
- 98. Other
- 99. Don't know

## **NO QUESTION 15**

### **ASK ALL:**

- Q.16 We're interested in finding out why you think America has been successful during this past century. As I read a list, tell me whether you think each thing is a major reason, a minor reason or not a reason that America has been so successful in this century. (First,) **(INSERT ITEM; ROTATE)** do you think this is a major reason, a minor reason or not a reason for America's success? How about...



- a. Abundant natural resources (4/68)
- b. The free enterprise system (4/69)
- c. The cultural diversity of our people (4/70)
- d. Judeo- **(Pronounced: Ju-DAY-oh)** Christian beliefs (4/71)
- e. Good luck (4/72)
- f. God's will (4/73)
- g. The two-party system (4/74)
- h. Free elections (4/75)
- i. Our Constitution (4/76)
- j. Separation of church and state (4/77)
- k. Freedom of the press (4/78)
- l. Our geographic isolation — that is being protected by oceans on both coasts (5/7)
- m. The character of the American people (5/8)

**CATEGORIES:**

- 1 Major reason
- 2 Minor reason
- 3 Not a reason
- 9 Don't know/Refused

Q.17 I'm going to read you some pairs of events, for each pair tell me if you happen to know which one came FIRST. The first pair is **(INSERT PAIR; ROTATE, ALWAYS STARTING WITH ITEM "a")**, do you happen to know which came first or can't you recall? How about...

- a. 1 The Korean War (5/9)  
OR  
2 World War II

**NO ITEM b**

- c. 1 The building of the Panama Canal (5/11)  
OR  
2 The building of the Interstate Highway System
- d. 1 The building of the Berlin Wall in East Germany (5/12)  
OR  
2 The creation of the NATO alliance in Europe
- e. 1 The Supreme Court's decision in *Roe v. Wade* legalizing abortion (5/13)  
OR  
2 The Supreme Court's decision in *Brown v. Board of Education* declaring separate but equal facilities for blacks and whites unconstitutional
- f. 1 The Cuban missile crisis (5/14)

OR

2 Nixon's historic visit to China

g. 1 Iran-Contra

(5/15)

OR

2 Watergate

**CATEGORIES:**

1 Item #1

2 Item #2

9 Don't know/Refused

Now, I'd like to ask you some questions about the coming of the year 2000...

Q.18 How do you feel about the coming of the year 2000? Do you think this has any special significance or do you think it will be just another year on the calendar? *{new}*

1 Special significance

(5/17)

2 Just another year on the calendar

9 Don't know

Q.19 Now I'm going to read a list. Please tell me if each item describes how you feel about the coming of the year 2000. (First,) **(READ; ROTATE)**, does this describe how you feel about the coming of the year 2000, or not? What about... *{new}*

a. Hopeful

(5/18)

b. Curious

(5/19)

c. Excited

(5/20)

d. Worried

(5/21)

**CATEGORIES:**

1 Yes

2 No

9 Don't know/Refused

**IF YES IN Q.19d ("WORRIED"), ASK:**

Q.20 You mentioned that you feel worried about the coming of the year 2000. Why are you worried? **(OPEN-END; PROBE FOR MULTIPLE RESPONSES)** *{new}*

(5/23-24, 25-26, 27-28, 29-30, 31-32)

Y2K Computer Bug

01. Y2K problem/Millennium bug

02. Computer crash will cause chaos

03. People will overreact/False panic

04. Electricity/utilities might go off

- 05. Things being locked up
- 06. Bank records getting messed up/Money not available/ATMs down
- 07. Transportation
- 08. Communication
- 09. Government hasn't been honest about the problem
- 10. Lack of organized back-up plans/Not prepared

#### Public Safety

- 21. Panic/people being safe
- 22. Could be a real mess/No one knows what will happen/Unpredictability
- 23. Food shortages

#### War/Armageddon

- 31. Wars/nuclear threat/our defense systems
- 32. European theater can become World War III
- 33. End of the world
- 34. International events/unrest/Political situation in the world
- 35. Stories/rumors/speculation (non-specific)
- 39. Religious significance/reference to the Bible

#### Economy

- 41. People losing jobs
- 45. Economic concerns/another depression
- 50. Social Security/Medicaid/Medicare
- 55. Major weather changes/Natural disasters
- 58. Ecology/Pollution/Nuclear waste

#### Crime/violence (pre and post Littleton) SUBNET (codes 60 & 63)

- 60. Crime /violence (pre Littleton)
- 63. Crime/violence (post Littleton)
- 65. Change/All the changes in our way of life
- 80. Moral/spiritual values declining
- 85. Technology growing too fast/running our lives
- 90. What it will bring/What the future holds
- 92. Always worry about everything/Worried it will get worse
- 95. Personal worries/health/getting older
- 96. Not worried/Ready for what comes
- 98. Other
- 99. Don't know

#### **ASK ALL:**

Now, thinking about the long term future, that is the next 50 years or so...

- Q.21 First, thinking about you and your family... Would you say you are very optimistic, somewhat optimistic, somewhat pessimistic, or very pessimistic about life for you and

your family over the next 50 years? *{new}*

- 1 Very optimistic (5/33)
- 2 Somewhat optimistic
- 3 Somewhat pessimistic
- 4 Very pessimistic
- 9 Don't know/Refused

Q.22 Now, thinking about the United States... Would you say you are very optimistic, somewhat optimistic, somewhat pessimistic, or very pessimistic about the future of the U.S., over the next 50 years? *{new}*

- 1 Very optimistic (5/34)
- 2 Somewhat optimistic
- 3 Somewhat pessimistic
- 4 Very pessimistic
- 9 Don't know/Refused

On another subject...

Q.23 Are you the parent or guardian of any children under 18 years of age?

- 1 Yes — **GO TO Q.24** (5/35)
- 2 No — **GO TO Q.25**
- 9 Don't know/Refused — **GO TO Q.25**

Q.24 Looking to the future, when your children grow up do you think they will be better off or worse off than you are now? *{12-96 SOU}*

- 1 Better off (5/36)
- 2 Worse off
- 3 Same (**VOLUNTEERED**)
- 9 Don't know/Refused

**ASK ALL:**

Q.25 Looking to the future, do you think MOST children in this country will grow up to be better off or worse off than their parents? *{12-96 SOU}*

- 1 Better off (5/37)
- 2 Worse off
- 3 Same (**VOLUNTEERED**)
- 9 Don't know/Refused

**ROTATE Q.26 AND Q.27/27a**

Q.26 If life is going to be better in this country in the future, how big a role do you think each of the following will play: (First) will (**INSERT -- READ AND ROTATE**) play a

major role, a minor role, or no role at all in making things better? How about... {12-96  
SOU, items were split form}

- |      |                                        |        |
|------|----------------------------------------|--------|
| a.   | Science and technology                 | (5/39) |
| b.   | Multi-national corporations {modified} | (5/40) |
| c.   | Small businesses                       | (5/41) |
| d.   | Organized religion {modified}          | (5/42) |
| e.   | Schools and universities               | (5/43) |
| f.F1 | The government in Washington           | (5/44) |
| g.F2 | Government                             | (5/45) |
| h.   | The news media                         | (5/46) |
| l.   | The military {new}                     | (5/47) |
| m.   | Medical advances {new}                 | (5/48) |

**CATEGORIES:**

- |   |                    |
|---|--------------------|
| 1 | Major role         |
| 2 | Minor role         |
| 3 | No role at all     |
| 9 | Don't know/Refused |

Q.27 In your opinion, how much of a threat to our country's future well-being are each of the following: (First) is **(INSERT --READ AND ROTATE ITEMS a-i; SUBSTITUTE "ARE" FOR "IS" FOR ITEM g)** a major threat, a minor threat, or not a threat at all? How about... *{Q.27/27a are from 12-96 SOU, unless otherwise noted.}*

- a. The news media (5/49)
- b. Immigration into this country *{modified}* (5/50)
- c.F1 The government in Washington (5/51)
- d.F2 Government (5/52)
- e. The pace of technological change (5/53)
- f. Economic competition from other nations (5/54)
- g. Multi-national corporations *{new}* (5/55)
- h. Population growth *{new}* (5/56)
- i. Commercial and residential development *{new}* (5/57)

**CATEGORIES:**

- 1 Major threat
- 2 Minor threat
- 3 Not a threat at all
- 9 Don't know/Refused

Q.27a And now a few more items... (First,) is/are **(INSERT ITEM ROTATE a-e)** a major threat, a minor threat, or not a threat at all? How about...

- a. International terrorists (5/58)
- b. Anti-government groups (5/59)
- c. Racial conflict (5/60)
- d. Special interest groups in politics (5/61)
- e. Environmental problems *{new}* (5/62)

**CATEGORIES:**

- 1 Major threat
- 2 Minor threat
- 3 Not a threat at all
- 9 Don't know/Refused

Q.28 Thinking ahead over the next 50 years, as I read the following pairs, please tell me which is more likely to happen here in the U.S.. (First/Next), do you think . . .**(INSERT ITEM PAIRS -- READ AND ROTATE)** {12-96 SOU, items a-f are trends}

**OBSERVE FORM DIFFERENCES:**

- |      |    |                                                             |        |
|------|----|-------------------------------------------------------------|--------|
| a.F1 | 1. | The crime rate will be higher                               | (5/63) |
|      | OR |                                                             |        |
|      | 2. | The crime rate will be lower                                |        |
| b.F2 | 1. | Health care will be MORE affordable                         | (5/68) |
|      | OR |                                                             |        |
|      | 2. | Health care will be LESS affordable                         |        |
| c.F1 | 1. | The U.S. economy will be stronger                           | (5/64) |
|      | OR |                                                             |        |
|      | 2. | The U.S. economy will be weaker                             |        |
| d.F2 | 1. | Race relations will improve                                 | (5/69) |
|      | OR |                                                             |        |
|      | 2. | Race relations will get worse                               |        |
| e.F1 | 1. | The public education system will improve                    | (5/65) |
|      | OR |                                                             |        |
|      | 2. | The public education system will get worse                  |        |
| f.F2 | 1  | People will live much longer                                | (5/70) |
|      | OR |                                                             |        |
|      | 2  | People will live about as long as they do now               |        |
| g.F1 | 1  | Honesty and ethics among our elected leaders will improve   | (5/66) |
|      | OR |                                                             |        |
|      | 2  | Honesty and ethics among our elected leaders will get worse |        |
| h.F2 | 1  | The gap between rich and poor will grow                     | (5/71) |
|      | OR |                                                             |        |
|      | 2  | The gap between rich and poor will get smaller              |        |
| i.F1 | 1  | More babies will be born out of wedlock                     | (5/67) |
|      | OR |                                                             |        |
|      | 2  | Fewer babies will be born out of wedlock                    |        |

**CATEGORIES:**

- |   |                                   |
|---|-----------------------------------|
| 1 | Statement 1                       |
| 2 | Statement 2                       |
| 3 | Neither/No change ( <b>VOL.</b> ) |
| 9 | Don't know/Refused                |

Q.29 Now I'm going to read you a list of things that may or may not happen in the next 50 years. Please tell me how likely you think it is that each will happen. (First,) How likely do you think it is that **(INSERT ITEM; ROTATE)**... do you think this will definitely happen, will probably happen, will probably NOT happen, or will definitely not happen? {new} How about...

**OBSERVE FORM DIFFERENCES:**

- |      |                                                                                                |        |
|------|------------------------------------------------------------------------------------------------|--------|
| a.   | Jesus Christ will return to earth                                                              | (5/72) |
| b.F1 | There will be a nuclear war involving the U.S.                                                 | (5/73) |
| c.F2 | There will be a nuclear war                                                                    | (5/74) |
| d.   | There will be a major terrorist attack on the U.S. involving biological or chemical weapons    | (5/75) |
| e.   | The world will face a major energy crisis                                                      | (5/76) |
| f.F1 | The earth will get warmer                                                                      | (5/77) |
| g.F2 | We will make progress in improving our environment                                             | (5/78) |
| h.F1 | An asteroid will hit the earth                                                                 | (6/7)  |
| i.F2 | We will make contact with alien life                                                           | (6/8)  |
| j.F1 | Ordinary people will travel in space                                                           | (6/9)  |
| k.F2 | A manned spacecraft will land on Mars                                                          | (6/10) |
| l.   | The Republican and Democratic parties will continue to be our only two major political parties | (6/11) |
| m.F1 | There will be an epidemic worse than AIDS                                                      | (6/12) |
| n.F2 | There will be a cure for AIDS                                                                  | (6/13) |
| o.   | There will be a major earthquake in California                                                 | (6/14) |
| p.   | There will be a cure for cancer                                                                | (6/15) |
| q.F1 | The Catholic Church will allow priests to marry                                                | (6/16) |
| r.F2 | The Catholic Church will ordain women as priests                                               | (6/17) |
| s.F1 | China will become a rival superpower to the U.S.                                               | (6/18) |
| t.F2 | The U.S. will remain the world's only superpower                                               | (6/19) |
| u.F1 | A woman will be elected U.S. president                                                         | (6/20) |
| v.F2 | An African American will be elected U.S. president                                             | (6/21) |
| w.F1 | Democracy will continue to spread around the world                                             | (6/22) |
| x.F2 | More countries will be ruled by dictators                                                      | (6/23) |
| y.   | We will clone human beings                                                                     | (6/24) |

**CATEGORIES:**

- |   |                            |
|---|----------------------------|
| 1 | Will definitely happen     |
| 2 | Will probably happen       |
| 3 | Will probably not happen   |
| 4 | Will definitely not happen |
| 9 | Don't know/Refused         |



On another subject...

Q.30 If it were possible, would you like to live to the 22<sup>nd</sup> century — that is another 100 years — or do you think you would prefer not to? *{new}*

- 1 Yes, would want to live another 100 years (6/25)
- 2 No, would not
- 9 Don't know/Refused

**ASK FORM 1 ONLY:**

Q.31

F1 Now I'm going to read you some pairs of statements and ask you to choose which one comes closest to your point of view, even if neither is exactly right. (First,) **(INSERT PAIR; ROTATE)**, which comes closest to your point of view?

- a. Our growing reliance on technology is generally GOOD because it makes life more convenient and easier (6/26)

OR...

Our growing reliance on technology is generally BAD because we will become too dependent on it and life will get too complicated

- b. The global economy will HELP average Americans because it will strengthen our economy and keep prices affordable for consumers (6/27)

OR...

The global economy will HURT average Americans because businesses will rely more on cheap labor from other countries and U.S. jobs will be lost

- c. The growing world population will NOT be a major problem because we will find a way to stretch our natural resources (6/28)  
OR...  
The growing population WILL be a major problem because there won't be enough food and resources to go around
- d. Medical advances that prolong life are generally GOOD because they allow people to live longer (6/29)  
OR...  
These advances are BAD because they interfere with the natural cycle of life
- e. Interracial marriages are GOOD because they help break down racial barriers (6/30)  
OR...  
Interracial marriages are BAD because mixing races reduces the special talents or gifts of each individual race
- f. If the number of legal immigrants to the U.S. continues to grow this will HELP America because they will contribute to our society (6/31)  
OR...  
If the number of legal immigrants to the U.S. continues to grow this will HURT America because they are changing American society too much

**CATEGORIES:**

- 1 Statement #1
- 2 Statement #2
- 3 Neither/Both equally (**VOL.**)
- 9 Don't know/Refused

**ASK FORM 2 ONLY:**

Q32. F2        Now I'm going to read you some pairs of statements and ask you to choose which one comes closest to your point of view, even if neither is exactly right. (First,) **(INSERT PAIR; ROTATE)**, which comes closest to your point of view?

- a.        Our growing reliance on technology is generally BAD because we will become too dependent on it and life will get too complicated        (6/32)  
OR...  
Our growing reliance on technology is generally GOOD because it makes life more convenient and easier
- b.        The global economy will HURT average Americans because businesses will rely more on cheap labor from other countries and U.S. jobs will be lost        (6/33)  
OR...  
The global economy will HELP average Americans because it will strengthen our economy and keep prices affordable for consumers
- c.        The growing world population WILL be a major problem because there won't be enough food and resources to go around        (6/34)  
OR...  
The growing population will NOT be a major problem because we will find a way to stretch our natural resources
- d.        Medical advances that prolong life are generally BAD because they interfere with the natural cycle of life        (6/35)  
OR...  
These advances are generally GOOD because they allow people to live longer
- e.        Interracial marriages are BAD because mixing races reduces the special talents or gifts of each individual race        (6/36)  
OR...  
Interracial marriages are GOOD because they help break down racial barriers
- f.        If the number of legal immigrants to the U.S. continues to grow this will HURT America because they are changing American society too much        (6/37)  
OR...  
If the number of legal immigrants to the U.S. continues to grow this will HELP America because they will contribute to our society

**CATEGORIES:**

- 1        Statement #1
- 2        Statement #2
- 3        Neither/Both equally (**VOL.**)
- 9        Don't know/Refused

**NO QUESTION 33**

**ASK ALL:**

Finally, I'd like to ask you a few questions for statistical purposes only...

Q.34 Do you use a computer at your workplace, at school, or at home on at least an occasional basis?

- 1 Yes (6/38)
- 2 No — **GO TO D.1**
- 9 Don't know/Refused — **GO TO D.1**

**IF YES (USE A COMPUTER) IN Q.34, ASK:**

Q.35 Do you ever go online to access the Internet or World Wide Web or to send and receive email?

- 1 Yes (6/39)
- 2 No
- 9 Don't know

D.1 ENTER RESPONDENT'S SEX:

- 1 Male (1/57)
- 2 Female

D.2 What is your age?

\_\_\_\_\_ years (6/40-41)

D.3 What is the last grade or class that you completed in school? (**DO NOT READ**)

- 1 None, or grade 1-8 (6/42)
- 2 High school incomplete (Grades 9-11)
- 3 High school graduate (Grade 12 or GED certificate)
- 4 Business, Technical, or vocational school AFTER high school
- 5 Some college, no 4-year degree
- 6 College graduate (B.S., B.A., or other 4-year degree)
- 7 Post-graduate training or professional schooling after college (e.g., toward a master's Degree or Ph.D.; law or medical school)
- 9 Don't know/Refused

D.4 Are you, yourself, of Hispanic origin or descent, such as Mexican, Puerto Rican, Cuban, or some other Spanish background?

- 1 Yes — **SEE INSTRUCTION** (6/43)
- 2 No — **GO TO D.5**
- 9 Don't know/Refused — **GO TO D.5**

**[INTERVIEWER: IF RESPONDENT ANSWERED 1 'HISPANIC' IN D.4, ASK: Are you white Hispanic, black Hispanic, or some other race? IF NON-HISPANIC ASK:]**

D.5 What is your race? Are you white, black, Asian, or some other?

- 1 White (6/45)
- 2 Black
- 3 Asian
- 4 Other or mixed race
- 9 Don't know/Refused

D.6 Are you married, divorced, separated, widowed, or never been married?

- 1 Married (6/46)
- 2 Divorced
- 3 Separated
- 4 Widowed
- 5 Never been married
- 9 Don't know/Refused

D.7 Aside from weddings and funerals, how often do you attend religious services... more than once a week, once a week, once or twice a month, a few times a year, seldom, or never?

- 1 More than once a week (6/47)
- 2 Once a week
- 3 Once or twice a month
- 4 A few times a year
- 5 Seldom
- 6 Never
- 9 Don't know/Refused

D.8 What is your religious preference — Protestant, Roman Catholic, Jewish, Mormon, or an orthodox church such as the Greek or Russian Orthodox Church?

- 1 Protestant (Baptist, Christian, Episcopal, Jehovah's Witness, Lutheran, Methodist, Presbyterian, etc.) (6/48-49)
- 2 Roman Catholic
- 3 Jewish — **GO TO D.9**
- 4 Mormon (include Church of Jesus Christ of Latter Day Saints)
- 5 Orthodox Church (Greek or Russian)
- 6 Islam/Muslim — **GO TO D.9**
- 7 Other religion (**SPECIFY**)
- 8 No religion, atheist — **GO TO D.9**
- 9 Don't know/Refused

D.8a Would you describe yourself as a "born again" or evangelical Christian, or not?

- 1 Yes, would (6/50)
- 2 No, would not
- 9 Don't know/Refused

**ASK ALL:**

D.9 Last year, that is in 1998, what was your total family income from all sources, before taxes? Just stop me when I get to the right category. (**READ**)

- 1 Less than \$10,000 (6/51)
- 2 \$10,000 to under \$20,000
- 3 \$20,000 to under \$30,000
- 4 \$30,000 to under \$40,000
- 5 \$40,000 to under \$50,000
- 6 \$50,000 to under \$75,000
- 7 \$75,000 to under \$100,000
- 8 \$100,000 or more
- 9 Don't know/Refused (**DO NOT READ**)

D.10 These days, many people are so busy they can't find time to register to vote, or move around so often they don't get a chance to re-register... Are you **NOW** registered to vote in your precinct or election district, or haven't you been able to register so far?

- 1 Yes, registered (6/52)
- 2 No, not registered — **GO TO D.12**
- 9 Don't know/Refused — **GO TO D.12**

D.11 Are you absolutely certain you are registered to vote, or is there a chance your registration has lapsed because you moved or for some other reason?

- |   |                                |        |
|---|--------------------------------|--------|
| 1 | Absolutely certain             | (6/53) |
| 2 | Chance registration has lapsed |        |
| 9 | Don't know/Refused             |        |

**ASK ALL:**

D.12 In politics today, do you consider yourself a Republican, Democrat or Independent?

- |   |                                |        |
|---|--------------------------------|--------|
| 1 | Republican - <b>GO TO D.14</b> | (6/54) |
| 2 | Democrat - <b>GO TO D.14</b>   |        |
| 3 | Independent                    |        |
| 4 | No Preference                  |        |
| 5 | Other                          |        |
| 9 | Don't know                     |        |

**IF ANSWERED 3, 4, 5 OR 9 IN D.12, ASK:**

D.13 As of today do you lean more to the Republican Party or more to the Democratic Party?

- |   |                          |        |
|---|--------------------------|--------|
| 1 | Republican               | (6/55) |
| 2 | Democrat                 |        |
| 9 | Other/Don't know/Refused |        |

**NO D.14**

D.15 Are you now employed full-time, part-time or not employed?

- |   |                    |        |
|---|--------------------|--------|
| 1 | Full-time          | (6/57) |
| 2 | Part-time          |        |
| 3 | Not employed       |        |
| 9 | Don't know/Refused |        |

**NO D.16**

D.17 Do you own or rent your own home?

- |   |                                         |        |
|---|-----------------------------------------|--------|
| 1 | Own                                     | (6/58) |
| 2 | Rent                                    |        |
| 3 | <b>(DO NOT READ)</b> Other arrangement  |        |
| 9 | <b>(DO NOT READ)</b> Don't know/Refused |        |

D.18 Are you or is your spouse a member of a labor union?

- |   |                    |        |
|---|--------------------|--------|
| 1 | Yes, respondent is | (6/60) |
| 2 | Yes, spouse is     |        |
| 3 | Yes, both          |        |
| 4 | Neither are        |        |
| 9 | Don't know/Refused |        |

D.19 Which of the following BEST describes the place where you now live?...**(READ)**

- |   |                                         |        |
|---|-----------------------------------------|--------|
| 1 | A large city                            | (6/61) |
| 2 | A suburb near a large city              |        |
| 3 | A small city or town                    |        |
| 4 | OR a rural area                         |        |
| 9 | <b>(DO NOT READ)</b> Don't know/Refused |        |

D.20 CHECK THE DAY OF WEEK INTERVIEW WAS COMPLETED

1 Mon   2 Tues   3 Wed   4 Thurs   5 Fri   6 Sat   7 Sun

END OF INTERVIEW. **THANK RESPONDENT**; Thank you very much for your time.

Have a nice day/evening.

I HEREBY ATTEST THAT THIS IS A TRUE AND HONEST INTERVIEW.

Weight = (8/71-74 (xx.xx)

ID = (1/7-9)



**Pew Research Center**

Note: Although state codes are given for this poll they are not meant to be used for analytical purposes. The surveys are only meant to be representative on a national and regional level.

| 4-Fold Region  | State Code |                | <u>Region</u>                |
|----------------|------------|----------------|------------------------------|
| (1) North East | ( 9)       | Connecticut    | CARD__1__ COLS.___36_____    |
|                | (23)       | Maine          |                              |
|                | (25)       | Massachusetts  | <u>State</u>                 |
|                | (33)       | New Hampshire  |                              |
|                | (34)       | New Jersey     | CARD__1__ COLS.___37-38_____ |
|                | (36)       | New York       |                              |
|                | (42)       | Pennsylvania   |                              |
|                | (44)       | Rhode Island   |                              |
|                | (50)       | Vermont        |                              |
| (2) South      | ( 1)       | Alabama        |                              |
|                | ( 5)       | Arkansas       |                              |
|                | (10)       | Delaware       |                              |
|                | (11)       | Washington D.C |                              |
|                | (12)       | Florida        |                              |
|                | (13)       | Georgia        |                              |
|                | (21)       | Kentucky       |                              |
|                | (22)       | Louisiana      |                              |
|                | (24)       | Maryland       |                              |
|                | (28)       | Mississippi    |                              |
|                | (37)       | North Carolina |                              |
|                | (40)       | Oklahoma       |                              |
|                | (45)       | South Carolina |                              |
|                | (47)       | Tennessee      |                              |
|                | (48)       | Texas          |                              |
|                | (51)       | Virginia       |                              |
|                | (54)       | West Virginia  |                              |
| (3) Midwest    | (17)       | Illinois       |                              |
|                | (18)       | Indiana        |                              |
|                | (19)       | Iowa           |                              |
|                | (20)       | Kansas         |                              |
|                | (26)       | Michigan       |                              |
|                | (27)       | Minnesota      |                              |
|                | (29)       | Missouri       |                              |
|                | (31)       | Nebraska       |                              |
|                | (38)       | North Dakota   |                              |
|                | (39)       | Ohio           |                              |
|                | (46)       | South Dakota   |                              |
|                | (55)       | Wisconsin      |                              |
| (4) West       | ( 2)       | Alaska         |                              |
|                | ( 4)       | Arizona        |                              |
|                | ( 6)       | California     |                              |
|                | ( 8)       | Colorado       |                              |
|                | (15)       | Hawaii         |                              |
|                | (16)       | Idaho          |                              |
|                | (30)       | Montana        |                              |
|                | (32)       | Nevada         |                              |
|                | (35)       | New Mexico     |                              |
|                | (41)       | Oregon         |                              |
|                | (49)       | Utah           |                              |
|                | (53)       | Washington     |                              |
|                | (56)       | Wyoming        |                              |

\*\*\* RESPONDENT # CARD 1 COLS 1 - 6 \*\*\*

< Batch Number >

-- CARD 1 COLS. 7- 9 --

< Interview Date >

-- CARD 1 COLS. 10-15 --

\*\*\* QUESTION # 1 \*\*\*

\*SCHULMAN, RONCA & BUCUVALAS, INC., 145 E. 32ND ST., N.Y., N.Y.  
.PEW RESEARCH CENTER FOR THE PEOPLE & THE PRESS  
.1999 MILLENNIUM SURVEY #1 - JOB #8069  
.APRIL 7, 1999  
.

\*\*\* QUESTION # 2 \*\*\*

\*SAMPLE READ-IN: REGION (1 DIGIT)  
GO TO Q. # 3 =====> < 1 > \*NORTHEAST  
GO TO Q. # 3 =====> < 2 > \*MIDWEST  
GO TO Q. # 3 =====> < 3 > \*SOUTH  
GO TO Q. # 3 =====> < 4 > \*WEST  
GO TO Q. # 3 =====> < 5 > [04]###  
-- CARD 1 COL. 36 --

\*\*\* QUESTION # 3 \*\*\*

<< CONDITIONAL ASSOCIATED WITH THIS QUESTION >>  
IF QUOTA GROUP # 1 CELL # 1 IS FULL (CONDITIONAL # 1)  
AND Q# 2 EQ CODE(S) 1 (CONDITIONAL # 2)  
THEN GO TO Q.#D24 ELSE GO TO Q.# 3.  
<< CONDITIONAL ASSOCIATED WITH THIS QUESTION >>  
IF QUOTA GROUP # 1 CELL # 2 IS FULL (CONDITIONAL # 3)  
AND Q# 2 EQ CODE(S) 2 (CONDITIONAL # 4)  
THEN GO TO Q.#D24 ELSE GO TO Q.# 3.  
<< CONDITIONAL ASSOCIATED WITH THIS QUESTION >>  
IF QUOTA GROUP # 1 CELL # 3 IS FULL (CONDITIONAL # 5)  
AND Q# 2 EQ CODE(S) 3 (CONDITIONAL # 6)  
THEN GO TO Q.#D24 ELSE GO TO Q.# 3.  
<< CONDITIONAL ASSOCIATED WITH THIS QUESTION >>  
IF QUOTA GROUP # 1 CELL # 4 IS FULL (CONDITIONAL # 7)  
AND Q# 2 EQ CODE(S) 4 (CONDITIONAL # 8)

THEN GO TO Q.#D24 ELSE GO TO Q.# 3.  
 \*SAMPLE READ-IN: CATI STATE CODE (2 DIGITS)  
 GO TO Q. # 4 =====> < 1 > \*Alabama  
 GO TO Q. # 4 =====> < 2 > \*Alaska  
 GO TO Q. # 4 =====> < 3 > #hold  
 GO TO Q. # 4 =====> < 4 > \*Arizona  
 GO TO Q. # 4 =====> < 5 > \*Arkansas  
 GO TO Q. # 4 =====> < 6 > \*California  
 GO TO Q. # 4 =====> < 7 > #hold  
 GO TO Q. # 4 =====> < 8 > \*Colorado  
 GO TO Q. # 4 =====> < 9 > \*Connecticut  
 GO TO Q. # 4 =====> < 10 > \*Delaware  
 GO TO Q. # 4 =====> < 11 > \*District of Columbia  
 GO TO Q. # 4 =====> < 12 > \*Florida  
 GO TO Q. # 4 =====> < 13 > \*Georgia  
 GO TO Q. # 4 =====> < 14 > #hold  
 GO TO Q. # 4 =====> < 15 > \*Hawaii  
 GO TO Q. # 4 =====> < 16 > \*Idaho  
 GO TO Q. # 4 =====> < 17 > \*Illinois  
 GO TO Q. # 4 =====> < 18 > \*Indiana  
 GO TO Q. # 4 =====> < 19 > \*Iowa  
 GO TO Q. # 4 =====> < 20 > \*Kansas  
 GO TO Q. # 4 =====> < 21 > \*Kentucky  
 GO TO Q. # 4 =====> < 22 > \*Louisiana  
 GO TO Q. # 4 =====> < 23 > \*Maine  
 GO TO Q. # 4 =====> < 24 > \*Maryland  
 GO TO Q. # 4 =====> < 25 > \*Massachusetts  
 GO TO Q. # 4 =====> < 26 > \*Michigan  
 GO TO Q. # 4 =====> < 27 > \*Minnesota  
 GO TO Q. # 4 =====> < 28 > \*Mississippi  
 GO TO Q. # 4 =====> < 29 > \*Missouri  
 GO TO Q. # 4 =====> < 30 > \*Montana  
 GO TO Q. # 4 =====> < 31 > \*Nebraska  
 GO TO Q. # 4 =====> < 32 > \*Nevada  
 GO TO Q. # 4 =====> < 33 > \*New Hampshire  
 GO TO Q. # 4 =====> < 34 > \*New Jersey  
 GO TO Q. # 4 =====> < 35 > \*New Mexico  
 GO TO Q. # 4 =====> < 36 > \*New York  
 GO TO Q. # 4 =====> < 37 > \*North Carolina  
 GO TO Q. # 4 =====> < 38 > \*North Dakota  
 GO TO Q. # 4 =====> < 39 > \*Ohio  
 GO TO Q. # 4 =====> < 40 > \*Oklahoma  
 GO TO Q. # 4 =====> < 41 > \*Oregon  
 GO TO Q. # 4 =====> < 42 > \*Pennsylvania

GO TO Q. # 4 =====> < 43 > #hold  
 GO TO Q. # 4 =====> < 44 > \*Rhode Island  
 GO TO Q. # 4 =====> < 45 > \*South Carolina  
 GO TO Q. # 4 =====> < 46 > \*South Dakota  
 GO TO Q. # 4 =====> < 47 > \*Tennessee  
 GO TO Q. # 4 =====> < 48 > \*Texas  
 GO TO Q. # 4 =====> < 49 > \*Utah  
 GO TO Q. # 4 =====> < 50 > \*Vermont  
 GO TO Q. # 4 =====> < 51 > \*Virginia  
 GO TO Q. # 4 =====> < 52 > #hold  
 GO TO Q. # 4 =====> < 53 > \*Washington  
 GO TO Q. # 4 =====> < 54 > \*West Virginia  
 GO TO Q. # 4 =====> < 55 > \*Wisconsin  
 GO TO Q. # 4 =====> < 56 > \*Wyoming  
 GO TO Q. # 4 =====> < 57 > [05]###  
 -- CARD 1 COLS. 37-38 --

\*\*\* QUESTION # 4 \*\*\*  
 \*SAMPLE READ-IN: REP (2 DIGITS)  
 GO TO Q. # 5 =====> < 1 > [02]###  
 -- ANSWER REQUIRED --  
 -- CARD 1 COLS. 39-40 --

\*\*\* QUESTION # 5 \*\*\*  
 \*SAMPLE READ-IN: TZONE (1 DIGIT)  
 GO TO Q. # 6 =====> < 1 > \*EASTERN  
 GO TO Q. # 6 =====> < 2 > \*CENTRAL  
 GO TO Q. # 6 =====> < 3 > \*MOUNTAIN  
 GO TO Q. # 6 =====> < 4 > \*PACIFIC  
 GO TO Q. # 6 =====> < 5 > [03]###  
 -- CARD 1 COL. 41 --

\*\*\* QUESTION # 7 \*\*\*  
 \*SAMPLE READ-IN: U/S/R CODE (1 DIGIT)  
 GO TO Q. # 8 =====> < 1 > \*URBAN  
 GO TO Q. # 8 =====> < 2 > \*SUBURBAN  
 GO TO Q. # 8 =====> < 3 > \*RURAL  
 GO TO Q. # 8 =====> < 4 > [07]###  
 -- CARD 1 COL. 46 --

\*\*\* QUESTION # 8 \*\*\*

\*SAMPLE READ-IN: CENDIV (1 DIGIT)

GO TO Q. # 9 =====> < 1 > \*NEW ENGLAND

GO TO Q. # 9 =====> < 2 > \*MID-ATLANTIC

GO TO Q. # 9 =====> < 3 > \*EAST NORTH CENTRAL

GO TO Q. # 9 =====> < 4 > \*WEST NORTH CENTRAL

GO TO Q. # 9 =====> < 5 > \*SOUTH ATLANTIC

GO TO Q. # 9 =====> < 6 > \*EAST SOUTH CENTRAL

GO TO Q. # 9 =====> < 7 > \*WEST SOUTH CENTRAL

GO TO Q. # 9 =====> < 8 > \*MOUNTAIN

GO TO Q. # 9 =====> < 9 > \*PACIFIC

GO TO Q. # 9 =====> < 10 > [08]###

-- CARD 1 COLS. 47-48 --

\*\*\* QUESTION # 10 \*\*\*

\*SAMPLE READ-IN:

GO TO Q. # 11 =====> < 1 > #HOLD

GO TO Q. # 11 =====> < 2 > #HOLD

\*\*\* QUESTION # 11 \*\*\*

\*SAMPLE READ-IN: PHONTYPE (1 DIGIT)

GO TO Q. # 12 =====> < 1 > [11]###

-- ANSWER REQUIRED --

-- CARD 1 COL. 54 --

\*\*\* QUESTION # 12 \*\*\*

\*SAMPLE READ-IN: SSI REP (2 DIGITS)

GO TO Q. # 13 =====> < 1 > [12]###

-- ANSWER REQUIRED --

-- CARD 1 COLS. 55-56 --

\*\*\* QUESTION # 13 \*\*\*

\*SAMPLE READ-IN:

GO TO Q. # 14 =====> < 1 > #HOLD

GO TO Q. # 14 =====> < 2 > #HOLD

\*\*\* QUESTION # 14 \*\*\*

TELEPHONE: [01]###

REGION: [Q2]###

.  
Hello, I am [I]### calling for

Princeton Survey Research Associates in Princeton, New Jersey. We are conducting a telephone opinion survey for leading newspapers and TV stations around the country. I'd like to ask a few questions of the youngest male, 18 years of age or older, who is now at home.

.  
(IF NO MALE, ASK: "May I please speak with the oldest female, 18 years of age or older, who is now at home?")  
.

.  
> CONDUCT INTERVIEW 7> Away for duration 13> Health problem  
2> No answer 8> Disconnected phone/NIS 14> Hearing problem  
3> Answering machine 9> Business/Govt. phone 15> Call cannot be  
4> Busy signal 10> Fax/Computer tone completed/Line problem  
5> Initial callback 11> Language barrier 16> 2ND/HARD refusal  
6> 1ST/SOFT REFUSAL 12> No one 18+ in 17> CALLBACK (UNSPEC)  
. (CB 52+ HOURS) household

GO TO Q. # 15 =====> < 1 > \*CONDUCT INTERVIEW

DISP CODE # 1 =====> < 2 > \*NO ANSWER

DISP CODE # 12 =====> < 3 > \*ANSWERING MACHINE

DISP CODE # 2 =====> < 4 > \*BUSY SIGNAL

DISP CODE # 9 =====> < 5 > \*INITIAL CALLBACK

DISP CODE # 14 =====> < 6 > \*INITIAL REFUSAL (CB 52+ HOURS)

DISP CODE # 13 =====> < 7 > \*AWAY FOR DURATION

DISP CODE # 3 =====> < 8 > \*DISCONNECTED PHONE/NOT IN SERVICE

DISP CODE # 4 =====> < 9 > \*BUSINESS/GOVT. PHONE

DISP CODE # 7 =====> < 10 > \*FAX/COMPUTER TONE

DISP CODE # 8 =====> < 11 > \*LANGUAGE BARRIER

DISP CODE # 16 =====> < 12 > \*NO ONE, 18 YEARS OR OLDER AT NUMBER

DISP CODE # 17 =====> < 13 > \*HEALTH PROBLEM

DISP CODE # 17 =====> < 14 > \*HEARING PROBLEM

DISP CODE # 18 =====> < 15 > \*CALL CANNOT BE COMPLETED/LINE  
PROBLEM

DISP CODE # 19 =====> < 16 > \*SECOND REFUSAL

DISP CODE # 21 =====> < 17 > \*CALLBACK (UNSPECIFIED)

\*\*\* QUESTION # 15 \*\*\*

-D1- ENTER SEX OF RESPONDENT

GO TO Q. # 16 =====> < 1 > Male

GO TO Q. # 16 =====> < 2 > Female

-- CARD 1 COL. 57 --

\*\*\* QUESTION # 16 \*\*\*

<< CONDITIONAL ASSOCIATED WITH THIS QUESTION >>

IF Q# 2 EQ CODE(S) 1 (CONDITIONAL # 9)  
AND Q# 15 EQ CODE(S) 1 (CONDITIONAL # 10)  
THEN SHOW CODES 1  
AND HIDE CODES 2-8

<< CONDITIONAL ASSOCIATED WITH THIS QUESTION >>

IF Q# 2 EQ CODE(S) 1 (CONDITIONAL # 11)  
AND Q# 15 EQ CODE(S) 2 (CONDITIONAL # 12)  
THEN SHOW CODES 2  
AND HIDE CODES 1,3-8

<< CONDITIONAL ASSOCIATED WITH THIS QUESTION >>

IF Q# 2 EQ CODE(S) 2 (CONDITIONAL # 13)  
AND Q# 15 EQ CODE(S) 1 (CONDITIONAL # 14)  
THEN SHOW CODES 3  
AND HIDE CODES 1-2,4-8

<< CONDITIONAL ASSOCIATED WITH THIS QUESTION >>

IF Q# 2 EQ CODE(S) 2 (CONDITIONAL # 15)  
AND Q# 15 EQ CODE(S) 2 (CONDITIONAL # 16)  
THEN SHOW CODES 4  
AND HIDE CODES 1-3,5-8

<< CONDITIONAL ASSOCIATED WITH THIS QUESTION >>

IF Q# 2 EQ CODE(S) 3 (CONDITIONAL # 17)  
AND Q# 15 EQ CODE(S) 1 (CONDITIONAL # 18)  
THEN SHOW CODES 5  
AND HIDE CODES 1-4,6-8

<< CONDITIONAL ASSOCIATED WITH THIS QUESTION >>

IF Q# 2 EQ CODE(S) 3 (CONDITIONAL # 19)  
AND Q# 15 EQ CODE(S) 2 (CONDITIONAL # 20)  
THEN SHOW CODES 6  
AND HIDE CODES 1-5,7-8

<< CONDITIONAL ASSOCIATED WITH THIS QUESTION >>

IF Q# 2 EQ CODE(S) 4 (CONDITIONAL # 21)  
AND Q# 15 EQ CODE(S) 1 (CONDITIONAL # 22)  
THEN SHOW CODES 7

AND HIDE CODES 1-6,8  
 << CONDITIONAL ASSOCIATED WITH THIS QUESTION >>  
 IF Q# 2 EQ CODE(S) 4 (CONDITIONAL # 23)  
 AND Q# 15 EQ CODE(S) 2 (CONDITIONAL # 24)  
 THEN SHOW CODES 8  
 AND HIDE CODES 1-7  
 \*DUMMY QUESTION TO SHOW SEX/REGION  
 GO TO Q. # 17 =====> < 1 > MALE/NORTHEAST  
 GO TO Q. # 17 =====> < 2 > FEMALE/NORTHEAST  
 GO TO Q. # 17 =====> < 3 > MALE/MIDWEST  
 GO TO Q. # 17 =====> < 4 > FEMALE/MIDWEST  
 GO TO Q. # 17 =====> < 5 > MALE/SOUTH  
 GO TO Q. # 17 =====> < 6 > FEMALE/SOUTH  
 GO TO Q. # 17 =====> < 7 > MALE/WEST  
 GO TO Q. # 17 =====> < 8 > FEMALE/WEST  
 -- CARD 1 COL. 58 --  
  
 \*\*\* QUESTION # 17 \*\*\*  
 << CONDITIONAL ASSOCIATED WITH THIS QUESTION >>  
 IF QUOTA GROUP # 1 CELL # 5 IS FULL (CONDITIONAL # 25)  
 AND Q# 16 EQ CODE(S) 1 (CONDITIONAL # 26)  
 THEN GO TO Q.# 18 ELSE GO TO Q.# 19.  
 << CONDITIONAL ASSOCIATED WITH THIS QUESTION >>  
 IF QUOTA GROUP # 1 CELL # 6 IS FULL (CONDITIONAL # 27)  
 AND Q# 16 EQ CODE(S) 2 (CONDITIONAL # 28)  
 THEN GO TO Q.# 18 ELSE GO TO Q.# 19.  
 << CONDITIONAL ASSOCIATED WITH THIS QUESTION >>  
 IF QUOTA GROUP # 1 CELL # 7 IS FULL (CONDITIONAL # 29)  
 AND Q# 16 EQ CODE(S) 3 (CONDITIONAL # 30)  
 THEN GO TO Q.# 18 ELSE GO TO Q.# 19.  
 << CONDITIONAL ASSOCIATED WITH THIS QUESTION >>  
 IF QUOTA GROUP # 1 CELL # 8 IS FULL (CONDITIONAL # 31)  
 AND Q# 16 EQ CODE(S) 4 (CONDITIONAL # 32)  
 THEN GO TO Q.# 18 ELSE GO TO Q.# 19.  
 << CONDITIONAL ASSOCIATED WITH THIS QUESTION >>  
 IF QUOTA GROUP # 1 CELL # 9 IS FULL (CONDITIONAL # 33)  
 AND Q# 16 EQ CODE(S) 5 (CONDITIONAL # 34)  
 THEN GO TO Q.# 18 ELSE GO TO Q.# 19.  
 << CONDITIONAL ASSOCIATED WITH THIS QUESTION >>  
 IF QUOTA GROUP # 1 CELL # 10 IS FULL (CONDITIONAL # 35)  
 AND Q# 16 EQ CODE(S) 6 (CONDITIONAL # 36)  
 THEN GO TO Q.# 18 ELSE GO TO Q.# 19.



<< CONDITIONAL ASSOCIATED WITH THIS QUESTION >>  
IF QUOTA GROUP # 1 CELL # 11 IS FULL (CONDITIONAL # 37)  
AND Q# 16 EQ CODE(S) 7 (CONDITIONAL # 38)  
THEN GO TO Q.# 18 ELSE GO TO Q.# 19.

<< CONDITIONAL ASSOCIATED WITH THIS QUESTION >>  
IF QUOTA GROUP # 1 CELL # 12 IS FULL (CONDITIONAL # 39)  
AND Q# 16 EQ CODE(S) 8 (CONDITIONAL # 40)  
THEN GO TO Q.# 18 ELSE GO TO Q.# 19.

\*DUMMY QUESTION TO EVALUATE QUOTAS

GO TO Q. # 18 =====> < 1 > #HOLD

GO TO Q. # 18 =====> < 2 > #HOLD

\*\*\* QUESTION # 18 \*\*\*

Thank you for your time. We've completed all the interviews we need  
from your area of the country.

(ENTER PUNCH SHOW BELOW TO EXIT CATI)

DISP CODE # 26 =====> < 1 > Q/O MALE/NORTHEAST

DISP CODE # 26 =====> < 2 > Q/O FEMALE/NORTHEAST

DISP CODE # 26 =====> < 3 > Q/O MALE/MIDWEST

DISP CODE # 26 =====> < 4 > Q/O FEMALE/MIDWEST

DISP CODE # 26 =====> < 5 > Q/O MALE/SOUTH

DISP CODE # 26 =====> < 6 > Q/O FEMALE/SOUTH

DISP CODE # 26 =====> < 7 > Q/O MALE/WEST

DISP CODE # 26 =====> < 8 > Q/O FEMALE/WEST

DISP CODE # 26 =====> < 9 > \*HOLD

-- THIS QUESTION IS IN A GRID --

DISPLAY ANSWERS ALREADY MENTIONED IN QUESTIONS:

16

-- CARD 1 COL. 59 --

\*\*\* QUESTION # 19 \*\*\*

\*DUMMY QUESTION TO SELECT FORM

GO TO Q. # 20 =====> < 1 > FORM 1

GO TO Q. # 20 =====> < 2 > FORM 2

-- SPECIAL FEATURE \* SHUFFLING ANSWERS

ALL ANSWERS --

-- CARD 1 COL. 60 --

\*\*\* QUESTION # 20 \*\*\*

<< CONDITIONAL ASSOCIATED WITH THIS QUESTION >>

IF Q# 2 EQ CODE(S) 1 (CONDITIONAL # 41)  
AND Q# 19 EQ CODE(S) 1 (CONDITIONAL # 42)  
THEN SHOW CODES 1  
AND HIDE CODES 2-8

<< CONDITIONAL ASSOCIATED WITH THIS QUESTION >>

IF Q# 2 EQ CODE(S) 1 (CONDITIONAL # 43)  
AND Q# 19 EQ CODE(S) 2 (CONDITIONAL # 44)  
THEN SHOW CODES 2  
AND HIDE CODES 1,3-8

<< CONDITIONAL ASSOCIATED WITH THIS QUESTION >>

IF Q# 2 EQ CODE(S) 2 (CONDITIONAL # 45)  
AND Q# 19 EQ CODE(S) 1 (CONDITIONAL # 46)  
THEN SHOW CODES 3  
AND HIDE CODES 1-2,4-8

<< CONDITIONAL ASSOCIATED WITH THIS QUESTION >>

IF Q# 2 EQ CODE(S) 2 (CONDITIONAL # 47)  
AND Q# 19 EQ CODE(S) 2 (CONDITIONAL # 48)  
THEN SHOW CODES 4  
AND HIDE CODES 1-3,5-8

<< CONDITIONAL ASSOCIATED WITH THIS QUESTION >>

IF Q# 2 EQ CODE(S) 3 (CONDITIONAL # 49)  
AND Q# 19 EQ CODE(S) 1 (CONDITIONAL # 50)  
THEN SHOW CODES 5  
AND HIDE CODES 1-4,6-8

<< CONDITIONAL ASSOCIATED WITH THIS QUESTION >>

IF Q# 2 EQ CODE(S) 3 (CONDITIONAL # 51)  
AND Q# 19 EQ CODE(S) 2 (CONDITIONAL # 52)  
THEN SHOW CODES 6  
AND HIDE CODES 1-5,7-8

<< CONDITIONAL ASSOCIATED WITH THIS QUESTION >>

IF Q# 2 EQ CODE(S) 4 (CONDITIONAL # 53)  
AND Q# 19 EQ CODE(S) 1 (CONDITIONAL # 54)  
THEN SHOW CODES 7  
AND HIDE CODES 1-6,8

<< CONDITIONAL ASSOCIATED WITH THIS QUESTION >>

IF Q# 2 EQ CODE(S) 4 (CONDITIONAL # 55)  
AND Q# 19 EQ CODE(S) 2 (CONDITIONAL # 56)  
THEN SHOW CODES 8  
AND HIDE CODES 1-7

\*DUMMY QUESTION

GO TO Q. # 21 =====> < 1 > FORM 1/NORTHEAST  
GO TO Q. # 21 =====> < 2 > FORM 2/NORTHEAST  
GO TO Q. # 21 =====> < 3 > FORM 1/MIDWEST  
GO TO Q. # 21 =====> < 4 > FORM 2/MIDWEST  
GO TO Q. # 21 =====> < 5 > FORM 1/SOUTH  
GO TO Q. # 21 =====> < 6 > FORM 2/SOUTH  
GO TO Q. # 21 =====> < 7 > FORM 1/WEST  
GO TO Q. # 21 =====> < 8 > FORM 2/WEST

-- CARD 1 COL. 61 --

\*\*\* QUESTION # 21 \*\*\*

<< CONDITIONAL ASSOCIATED WITH THIS QUESTION >>  
IF QUOTA GROUP # 1 CELL # 13 IS FULL (CONDITIONAL # 57)  
AND Q# 20 EQ CODE(S) 1 (CONDITIONAL # 58)  
THEN GO TO Q.# 19 ELSE GO TO Q.# 22.  
<< CONDITIONAL ASSOCIATED WITH THIS QUESTION >>  
IF QUOTA GROUP # 1 CELL # 14 IS FULL (CONDITIONAL # 59)  
AND Q# 20 EQ CODE(S) 2 (CONDITIONAL # 60)  
THEN GO TO Q.# 19 ELSE GO TO Q.# 22.  
<< CONDITIONAL ASSOCIATED WITH THIS QUESTION >>  
IF QUOTA GROUP # 1 CELL # 15 IS FULL (CONDITIONAL # 61)  
AND Q# 20 EQ CODE(S) 3 (CONDITIONAL # 62)  
THEN GO TO Q.# 19 ELSE GO TO Q.# 22.  
<< CONDITIONAL ASSOCIATED WITH THIS QUESTION >>  
IF QUOTA GROUP # 1 CELL # 16 IS FULL (CONDITIONAL # 63)  
AND Q# 20 EQ CODE(S) 4 (CONDITIONAL # 64)  
THEN GO TO Q.# 19 ELSE GO TO Q.# 22.  
<< CONDITIONAL ASSOCIATED WITH THIS QUESTION >>  
IF QUOTA GROUP # 1 CELL # 17 IS FULL (CONDITIONAL # 65)  
AND Q# 20 EQ CODE(S) 5 (CONDITIONAL # 66)  
THEN GO TO Q.# 19 ELSE GO TO Q.# 22.  
<< CONDITIONAL ASSOCIATED WITH THIS QUESTION >>  
IF QUOTA GROUP # 1 CELL # 18 IS FULL (CONDITIONAL # 67)  
AND Q# 20 EQ CODE(S) 6 (CONDITIONAL # 68)  
THEN GO TO Q.# 19 ELSE GO TO Q.# 22.  
<< CONDITIONAL ASSOCIATED WITH THIS QUESTION >>  
IF QUOTA GROUP # 1 CELL # 19 IS FULL (CONDITIONAL # 69)

AND Q# 20 EQ CODE(S) 7 (CONDITIONAL # 70)  
THEN GO TO Q.# 19 ELSE GO TO Q.# 22.  
<< CONDITIONAL ASSOCIATED WITH THIS QUESTION >>  
IF QUOTA GROUP # 1 CELL # 20 IS FULL (CONDITIONAL # 71)  
AND Q# 20 EQ CODE(S) 8 (CONDITIONAL # 72)  
THEN GO TO Q.# 19 ELSE GO TO Q.# 22.  
\*DUMMY QUESTION TO EVALUATE FORM QUOTA  
GO TO Q. # 22 =====> < 1 > #HOLD  
GO TO Q. # 22 =====> < 2 > #HOLD

Table of FORM by CARD

| FORM      | CARD |      |      |      |      |      |      |      | Total |
|-----------|------|------|------|------|------|------|------|------|-------|
| Frequency | 1    | 2    | 3    | 4    | 5    | 6    | 7    | 8    |       |
| 1         | 1546 | 1546 | 1546 | 1546 | 1546 | 1546 | 1546 | 1546 | 12368 |
| Total     | 1546 | 1546 | 1546 | 1546 | 1546 | 1546 | 1546 | 1546 | 12368 |

Column Frequencies for USPEW1999-MILLENNIUM  
Source: The Roper Center, 05/07/2009

TYPE=MULTASC

FORM 1 CARD 1 (COL=80 )  
Records = 1546

| COL | & | - | 0    | 1    | 2   | 3   | 4    | 5   | 6   | 7   | 8   | 9    | BLANK | OTHER | NONBLNK | COL |
|-----|---|---|------|------|-----|-----|------|-----|-----|-----|-----|------|-------|-------|---------|-----|
| 1   | 0 | 0 | 1546 | 0    | 0   | 0   | 0    | 0   | 0   | 0   | 0   | 0    | 0     | 0     | 1546    | 1   |
| 2   | 0 | 0 | 914  | 437  | 195 | 0   | 0    | 0   | 0   | 0   | 0   | 0    | 0     | 0     | 1546    | 2   |
| 3   | 0 | 0 | 230  | 194  | 146 | 210 | 161  | 152 | 153 | 131 | 80  | 89   | 0     | 0     | 1546    | 3   |
| 4   | 0 | 0 | 149  | 187  | 198 | 140 | 169  | 164 | 150 | 125 | 132 | 132  | 0     | 0     | 1546    | 4   |
| 5   | 0 | 0 | 152  | 149  | 164 | 156 | 148  | 147 | 169 | 134 | 159 | 168  | 0     | 0     | 1546    | 5   |
| 6   | 0 | 0 | 148  | 168  | 134 | 182 | 147  | 165 | 148 | 156 | 134 | 164  | 0     | 0     | 1546    | 6   |
| 7   | 0 | 0 | 57   | 314  | 187 | 275 | 237  | 182 | 31  | 132 | 115 | 0    | 0     | 16    | 1546    | 7   |
| 8   | 0 | 0 | 349  | 316  | 313 | 262 | 131  | 72  | 33  | 15  | 10  | 45   | 0     | 0     | 1546    | 8   |
| 9   | 0 | 0 | 186  | 149  | 178 | 157 | 167  | 152 | 147 | 130 | 135 | 145  | 0     | 0     | 1546    | 9   |
| 10  | 0 | 0 | 1546 | 0    | 0   | 0   | 0    | 0   | 0   | 0   | 0   | 0    | 0     | 0     | 1546    | 10  |
| 11  | 0 | 0 | 0    | 0    | 0   | 0   | 1505 | 41  | 0   | 0   | 0   | 0    | 0     | 0     | 1546    | 11  |
| 12  | 0 | 0 | 243  | 754  | 541 | 8   | 0    | 0   | 0   | 0   | 0   | 0    | 0     | 0     | 1546    | 12  |
| 13  | 0 | 0 | 149  | 132  | 128 | 120 | 167  | 117 | 109 | 113 | 164 | 347  | 0     | 0     | 1546    | 13  |
| 14  | 0 | 0 | 0    | 0    | 0   | 0   | 0    | 0   | 0   | 0   | 0   | 1546 | 0     | 0     | 1546    | 14  |
| 15  | 0 | 0 | 0    | 0    | 0   | 0   | 0    | 0   | 0   | 0   | 0   | 1546 | 0     | 0     | 1546    | 15  |
| 16  | 0 | 0 | 0    | 0    | 0   | 0   | 0    | 0   | 0   | 0   | 0   | 0    | 1546  | 0     | 0       | 16  |
| 17  | 0 | 0 | 0    | 0    | 0   | 0   | 0    | 0   | 0   | 0   | 0   | 0    | 1546  | 0     | 0       | 17  |
| 18  | 0 | 0 | 0    | 0    | 0   | 0   | 0    | 0   | 0   | 0   | 0   | 0    | 1546  | 0     | 0       | 18  |
| 19  | 0 | 0 | 0    | 0    | 0   | 0   | 0    | 0   | 0   | 0   | 0   | 0    | 1546  | 0     | 0       | 19  |
| 20  | 0 | 0 | 0    | 0    | 0   | 0   | 0    | 0   | 0   | 0   | 0   | 0    | 1546  | 0     | 0       | 20  |
| 21  | 0 | 0 | 0    | 0    | 0   | 0   | 0    | 0   | 0   | 0   | 0   | 0    | 1546  | 0     | 0       | 21  |
| 22  | 0 | 0 | 0    | 0    | 0   | 0   | 0    | 0   | 0   | 0   | 0   | 0    | 1546  | 0     | 0       | 22  |
| 23  | 0 | 0 | 0    | 0    | 0   | 0   | 0    | 0   | 0   | 0   | 0   | 0    | 1546  | 0     | 0       | 23  |
| 24  | 0 | 0 | 0    | 0    | 0   | 0   | 0    | 0   | 0   | 0   | 0   | 0    | 1546  | 0     | 0       | 24  |
| 25  | 0 | 0 | 0    | 0    | 0   | 0   | 0    | 0   | 0   | 0   | 0   | 0    | 1546  | 0     | 0       | 25  |
| 26  | 0 | 0 | 0    | 0    | 0   | 0   | 0    | 0   | 0   | 0   | 0   | 0    | 1546  | 0     | 0       | 26  |
| 27  | 0 | 0 | 0    | 0    | 0   | 0   | 0    | 0   | 0   | 0   | 0   | 0    | 1546  | 0     | 0       | 27  |
| 28  | 0 | 0 | 0    | 0    | 0   | 0   | 0    | 0   | 0   | 0   | 0   | 0    | 1546  | 0     | 0       | 28  |
| 29  | 0 | 0 | 0    | 0    | 0   | 0   | 0    | 0   | 0   | 0   | 0   | 0    | 1546  | 0     | 0       | 29  |
| 30  | 0 | 0 | 0    | 0    | 0   | 0   | 0    | 0   | 0   | 0   | 0   | 0    | 1546  | 0     | 0       | 30  |
| 31  | 0 | 0 | 0    | 0    | 0   | 0   | 0    | 0   | 0   | 0   | 0   | 0    | 1546  | 0     | 0       | 31  |
| 32  | 0 | 0 | 0    | 0    | 0   | 0   | 0    | 0   | 0   | 0   | 0   | 0    | 1546  | 0     | 0       | 32  |
| 33  | 0 | 0 | 0    | 0    | 0   | 0   | 0    | 0   | 0   | 0   | 0   | 0    | 1546  | 0     | 0       | 33  |
| 34  | 0 | 0 | 0    | 0    | 0   | 0   | 0    | 0   | 0   | 0   | 0   | 0    | 1546  | 0     | 0       | 34  |
| 35  | 0 | 0 | 0    | 0    | 0   | 0   | 0    | 0   | 0   | 0   | 0   | 0    | 1546  | 0     | 0       | 35  |
| 36  | 0 | 0 | 0    | 293  | 375 | 574 | 304  | 0   | 0   | 0   | 0   | 0    | 0     | 0     | 1546    | 36  |
| 37  | 0 | 0 | 270  | 271  | 273 | 316 | 280  | 136 | 0   | 0   | 0   | 0    | 0     | 0     | 1546    | 37  |
| 38  | 0 | 0 | 45   | 147  | 200 | 91  | 122  | 117 | 317 | 162 | 180 | 165  | 0     | 0     | 1546    | 38  |
| 39  | 0 | 0 | 0    | 423  | 115 | 20  | 0    | 0   | 0   | 0   | 0   | 0    | 988   | 0     | 558     | 39  |
| 40  | 0 | 0 | 82   | 232  | 185 | 232 | 153  | 131 | 107 | 157 | 110 | 157  | 0     | 0     | 1546    | 40  |
| 41  | 0 | 0 | 0    | 786  | 453 | 104 | 203  | 0   | 0   | 0   | 0   | 0    | 0     | 0     | 1546    | 41  |
| 42  | 0 | 0 | 0    | 0    | 0   | 0   | 0    | 0   | 0   | 0   | 0   | 0    | 1546  | 0     | 0       | 42  |
| 43  | 0 | 0 | 0    | 0    | 0   | 0   | 0    | 0   | 0   | 0   | 0   | 0    | 1546  | 0     | 0       | 43  |
| 44  | 0 | 0 | 0    | 0    | 0   | 0   | 0    | 0   | 0   | 0   | 0   | 0    | 1546  | 0     | 0       | 44  |
| 45  | 0 | 0 | 0    | 0    | 0   | 0   | 0    | 0   | 0   | 0   | 0   | 0    | 1546  | 0     | 0       | 45  |
| 46  | 0 | 0 | 0    | 459  | 750 | 337 | 0    | 0   | 0   | 0   | 0   | 0    | 0     | 0     | 1546    | 46  |
| 47  | 0 | 0 | 1546 | 0    | 0   | 0   | 0    | 0   | 0   | 0   | 0   | 0    | 0     | 0     | 1546    | 47  |
| 48  | 0 | 0 | 0    | 72   | 221 | 257 | 118  | 312 | 107 | 155 | 111 | 193  | 0     | 0     | 1546    | 48  |
| 49  | 0 | 0 | 0    | 0    | 0   | 0   | 0    | 0   | 0   | 0   | 0   | 0    | 1546  | 0     | 0       | 49  |
| 50  | 0 | 0 | 0    | 0    | 0   | 0   | 0    | 0   | 0   | 0   | 0   | 0    | 1546  | 0     | 0       | 50  |
| 51  | 0 | 0 | 0    | 0    | 0   | 0   | 0    | 0   | 0   | 0   | 0   | 0    | 1546  | 0     | 0       | 51  |
| 52  | 0 | 0 | 0    | 0    | 0   | 0   | 0    | 0   | 0   | 0   | 0   | 0    | 1546  | 0     | 0       | 52  |
| 53  | 0 | 0 | 0    | 0    | 0   | 0   | 0    | 0   | 0   | 0   | 0   | 0    | 1546  | 0     | 0       | 53  |
| 54  | 0 | 0 | 491  | 576  | 0   | 479 | 0    | 0   | 0   | 0   | 0   | 0    | 0     | 0     | 1546    | 54  |
| 55  | 0 | 0 | 0    | 337  | 352 | 313 | 188  | 1   | 0   | 0   | 0   | 0    | 355   | 0     | 1191    | 55  |
| 56  | 0 | 0 | 149  | 173  | 162 | 152 | 157  | 171 | 168 | 137 | 137 | 140  | 0     | 0     | 1546    | 56  |
| 57  | 0 | 0 | 0    | 741  | 805 | 0   | 0    | 0   | 0   | 0   | 0   | 0    | 0     | 0     | 1546    | 57  |
| 58  | 0 | 0 | 0    | 140  | 153 | 177 | 198  | 262 | 312 | 162 | 142 | 0    | 0     | 0     | 1546    | 58  |
| 59  | 0 | 0 | 0    | 0    | 0   | 0   | 0    | 0   | 0   | 0   | 0   | 0    | 1546  | 0     | 0       | 59  |
| 60  | 0 | 0 | 0    | 789  | 757 | 0   | 0    | 0   | 0   | 0   | 0   | 0    | 0     | 0     | 1546    | 60  |
| 61  | 0 | 0 | 0    | 153  | 140 | 194 | 181  | 287 | 287 | 155 | 149 | 0    | 0     | 0     | 1546    | 61  |
| 62  | 0 | 0 | 0    | 984  | 176 | 319 | 0    | 0   | 0   | 0   | 0   | 67   | 0     | 0     | 1546    | 62  |
| 63  | 0 | 0 | 0    | 1100 | 60  | 0   | 0    | 0   | 0   | 0   | 0   | 0    | 386   | 0     | 1160    | 63  |
| 64  | 0 | 0 | 3    | 45   | 77  | 67  | 314  | 112 | 9   | 109 | 120 | 160  | 528   | 2     | 1018    | 64  |
| 65  | 0 | 0 | 91   | 404  | 118 | 37  | 147  | 48  | 132 | 49  | 62  | 10   | 446   | 2     | 1100    | 65  |
| 66  | 0 | 0 | 3    | 12   | 43  | 33  | 84   | 34  | 3   | 55  | 35  | 40   | 1204  | 0     | 342     | 66  |
| 67  | 0 | 0 | 19   | 132  | 45  | 23  | 41   | 20  | 37  | 8   | 30  | 0    | 1191  | 0     | 355     | 67  |
| 68  | 0 | 0 | 0    | 1    | 0   | 0   | 0    | 0   | 1   | 0   | 0   | 0    | 1532  | 12    | 14      | 68  |
| 69  | 0 | 0 | 0    | 0    | 1   | 0   | 0    | 0   | 1   | 0   | 0   | 0    | 1532  | 12    | 14      | 69  |
| 70  | 0 | 0 | 0    | 0    | 0   | 0   | 0    | 0   | 0   | 0   | 0   | 0    | 1540  | 6     | 6       | 70  |
| 71  | 0 | 0 | 0    | 0    | 0   | 0   | 0    | 0   | 0   | 0   | 0   | 0    | 1540  | 6     | 6       | 71  |
| 72  | 0 | 0 | 0    | 0    | 0   | 0   | 0    | 0   | 0   | 0   | 0   | 0    | 1545  | 1     | 1       | 72  |
| 73  | 0 | 0 | 0    | 0    | 0   | 0   | 0    | 0   | 0   | 0   | 0   | 0    | 1545  | 1     | 1       | 73  |
| 74  | 0 | 0 | 0    | 702  | 446 | 298 | 0    | 0   | 0   | 0   | 0   | 100  | 0     | 0     | 1546    | 74  |
| 75  | 0 | 0 | 0    | 1095 | 53  | 0   | 0    | 0   | 0   | 0   | 0   | 0    | 398   | 0     | 1148    | 75  |
| 76  | 0 | 0 | 6    | 328  | 111 | 103 | 24   | 67  | 2   | 64  | 33  | 95   | 710   | 3     | 836     | 76  |
| 77  | 0 | 0 | 149  | 277  | 133 | 185 | 80   | 181 | 7   | 1   | 76  | 3    | 451   | 3     | 1095    | 77  |
| 78  | 0 | 0 | 0    | 0    | 0   | 0   | 0    | 0   | 0   | 0   | 0   | 0    | 1546  | 0     | 0       | 78  |
| 79  | 0 | 0 | 0    | 0    | 0   | 0   | 0    | 0   | 0   | 0   | 0   | 0    | 1546  | 0     | 0       | 79  |
| 80  | 0 | 0 | 0    | 1546 | 0   | 0   | 0    | 0   | 0   | 0   | 0   | 0    | 0     | 0     | 1546    | 80  |

Column Frequencies for USPEW1999-MILLENNIUM  
Source: The Roper Center, 05/07/2009

TYPE=MULTASC

FORM 1 CARD 2 (COL=80 )  
Records = 1546

| COL | & | - | 0    | 1    | 2    | 3   | 4   | 5   | 6   | 7   | 8   | 9   | BLANK | OTHER | NONBLNK | COL |
|-----|---|---|------|------|------|-----|-----|-----|-----|-----|-----|-----|-------|-------|---------|-----|
| 1   | 0 | 0 | 1546 | 0    | 0    | 0   | 0   | 0   | 0   | 0   | 0   | 0   | 0     | 0     | 1546    | 1   |
| 2   | 0 | 0 | 914  | 437  | 195  | 0   | 0   | 0   | 0   | 0   | 0   | 0   | 0     | 0     | 1546    | 2   |
| 3   | 0 | 0 | 230  | 194  | 146  | 210 | 161 | 152 | 153 | 131 | 80  | 89  | 0     | 0     | 1546    | 3   |
| 4   | 0 | 0 | 149  | 187  | 198  | 140 | 169 | 164 | 150 | 125 | 132 | 132 | 0     | 0     | 1546    | 4   |
| 5   | 0 | 0 | 152  | 149  | 164  | 156 | 148 | 147 | 169 | 134 | 159 | 168 | 0     | 0     | 1546    | 5   |
| 6   | 0 | 0 | 148  | 168  | 134  | 182 | 147 | 165 | 148 | 156 | 134 | 164 | 0     | 0     | 1546    | 6   |
| 7   | 0 | 0 | 1    | 84   | 50   | 40  | 29  | 20  | 9   | 46  | 14  | 36  | 1216  | 1     | 330     | 7   |
| 8   | 0 | 0 | 57   | 74   | 94   | 65  | 28  | 95  | 7   | 2   | 27  | 3   | 1093  | 1     | 453     | 8   |
| 9   | 0 | 0 | 0    | 0    | 0    | 0   | 0   | 0   | 0   | 0   | 0   | 1   | 1521  | 24    | 25      | 9   |
| 10  | 0 | 0 | 0    | 0    | 0    | 0   | 0   | 1   | 0   | 0   | 0   | 0   | 1521  | 24    | 25      | 10  |
| 11  | 0 | 0 | 0    | 0    | 0    | 0   | 0   | 0   | 0   | 0   | 0   | 0   | 1533  | 13    | 13      | 11  |
| 12  | 0 | 0 | 0    | 0    | 0    | 0   | 0   | 0   | 0   | 0   | 0   | 0   | 1533  | 13    | 13      | 12  |
| 13  | 0 | 0 | 0    | 0    | 0    | 0   | 0   | 0   | 0   | 0   | 0   | 0   | 1535  | 11    | 11      | 13  |
| 14  | 0 | 0 | 0    | 0    | 0    | 0   | 0   | 0   | 0   | 0   | 0   | 0   | 1535  | 11    | 11      | 14  |
| 15  | 0 | 0 | 0    | 408  | 146  | 192 | 0   | 0   | 0   | 0   | 0   | 43  | 757   | 0     | 789     | 15  |
| 16  | 0 | 0 | 0    | 661  | 69   | 36  | 0   | 0   | 0   | 0   | 0   | 23  | 757   | 0     | 789     | 16  |
| 17  | 0 | 0 | 0    | 491  | 103  | 29  | 0   | 0   | 0   | 0   | 0   | 166 | 757   | 0     | 789     | 17  |
| 18  | 0 | 0 | 0    | 482  | 201  | 66  | 0   | 0   | 0   | 0   | 0   | 40  | 757   | 0     | 789     | 18  |
| 19  | 0 | 0 | 0    | 404  | 179  | 174 | 0   | 0   | 0   | 0   | 0   | 32  | 757   | 0     | 789     | 19  |
| 20  | 0 | 0 | 0    | 511  | 42   | 64  | 0   | 0   | 0   | 0   | 0   | 172 | 757   | 0     | 789     | 20  |
| 21  | 0 | 0 | 0    | 151  | 517  | 43  | 0   | 0   | 0   | 0   | 0   | 78  | 757   | 0     | 789     | 21  |
| 22  | 0 | 0 | 0    | 274  | 429  | 49  | 0   | 0   | 0   | 0   | 0   | 37  | 757   | 0     | 789     | 22  |
| 23  | 0 | 0 | 0    | 406  | 131  | 173 | 0   | 0   | 0   | 0   | 0   | 47  | 789   | 0     | 757     | 23  |
| 24  | 0 | 0 | 0    | 619  | 46   | 55  | 0   | 0   | 0   | 0   | 0   | 37  | 789   | 0     | 757     | 24  |
| 25  | 0 | 0 | 0    | 354  | 327  | 48  | 0   | 0   | 0   | 0   | 0   | 28  | 789   | 0     | 757     | 25  |
| 26  | 0 | 0 | 0    | 628  | 55   | 43  | 0   | 0   | 0   | 0   | 0   | 31  | 789   | 0     | 757     | 26  |
| 27  | 0 | 0 | 0    | 464  | 179  | 88  | 0   | 0   | 0   | 0   | 0   | 26  | 789   | 0     | 757     | 27  |
| 28  | 0 | 0 | 0    | 347  | 159  | 175 | 0   | 0   | 0   | 0   | 0   | 76  | 789   | 0     | 757     | 28  |
| 29  | 0 | 0 | 0    | 271  | 221  | 87  | 0   | 0   | 0   | 0   | 0   | 178 | 789   | 0     | 757     | 29  |
| 30  | 0 | 0 | 0    | 634  | 155  | 0   | 0   | 0   | 0   | 0   | 0   | 0   | 757   | 0     | 789     | 30  |
| 31  | 0 | 0 | 11   | 58   | 39   | 34  | 47  | 28  | 9   | 19  | 0   | 55  | 1232  | 14    | 314     | 31  |
| 32  | 0 | 0 | 27   | 187  | 51   | 171 | 55  | 47  | 13  | 18  | 43  | 8   | 912   | 14    | 634     | 32  |
| 33  | 0 | 0 | 2    | 5    | 4    | 6   | 13  | 3   | 2   | 3   | 0   | 6   | 1502  | 0     | 44      | 33  |
| 34  | 0 | 0 | 3    | 27   | 6    | 13  | 10  | 7   | 1   | 5   | 6   | 0   | 1468  | 0     | 78      | 34  |
| 35  | 0 | 0 | 0    | 0    | 0    | 0   | 0   | 0   | 0   | 0   | 0   | 0   | 1542  | 4     | 4       | 35  |
| 36  | 0 | 0 | 0    | 0    | 0    | 0   | 0   | 0   | 0   | 0   | 0   | 0   | 1542  | 4     | 4       | 36  |
| 37  | 0 | 0 | 0    | 0    | 0    | 0   | 0   | 0   | 0   | 0   | 0   | 0   | 1546  | 0     | 0       | 37  |
| 38  | 0 | 0 | 0    | 0    | 0    | 0   | 0   | 0   | 0   | 0   | 0   | 0   | 1546  | 0     | 0       | 38  |
| 39  | 0 | 0 | 0    | 0    | 0    | 0   | 0   | 0   | 0   | 0   | 0   | 0   | 1546  | 0     | 0       | 39  |
| 40  | 0 | 0 | 0    | 0    | 0    | 0   | 0   | 0   | 0   | 0   | 0   | 0   | 1546  | 0     | 0       | 40  |
| 41  | 0 | 0 | 0    | 662  | 127  | 0   | 0   | 0   | 0   | 0   | 0   | 0   | 757   | 0     | 789     | 41  |
| 42  | 0 | 0 | 4    | 47   | 140  | 39  | 81  | 44  | 69  | 55  | 10  | 98  | 941   | 18    | 605     | 42  |
| 43  | 0 | 0 | 52   | 88   | 116  | 111 | 99  | 88  | 2   | 4   | 75  | 9   | 884   | 18    | 662     | 43  |
| 44  | 0 | 0 | 0    | 3    | 6    | 5   | 0   | 9   | 1   | 6   | 1   | 6   | 1509  | 0     | 37      | 44  |
| 45  | 0 | 0 | 3    | 10   | 7    | 9   | 5   | 3   | 0   | 1   | 6   | 0   | 1502  | 0     | 44      | 45  |
| 46  | 0 | 0 | 0    | 0    | 0    | 0   | 0   | 0   | 0   | 0   | 0   | 0   | 1542  | 4     | 4       | 46  |
| 47  | 0 | 0 | 0    | 0    | 0    | 0   | 0   | 0   | 0   | 0   | 0   | 0   | 1542  | 4     | 4       | 47  |
| 48  | 0 | 0 | 0    | 0    | 0    | 0   | 0   | 0   | 0   | 0   | 0   | 0   | 1543  | 3     | 3       | 48  |
| 49  | 0 | 0 | 0    | 0    | 0    | 0   | 0   | 0   | 0   | 0   | 0   | 0   | 1543  | 3     | 3       | 49  |
| 50  | 0 | 0 | 0    | 0    | 0    | 0   | 0   | 0   | 0   | 0   | 0   | 0   | 1545  | 1     | 1       | 50  |
| 51  | 0 | 0 | 0    | 0    | 0    | 0   | 0   | 0   | 0   | 0   | 0   | 0   | 1545  | 1     | 1       | 51  |
| 52  | 0 | 0 | 0    | 530  | 227  | 0   | 0   | 0   | 0   | 0   | 0   | 0   | 789   | 0     | 757     | 52  |
| 53  | 0 | 0 | 2    | 47   | 39   | 62  | 91  | 29  | 13  | 0   | 0   | 100 | 1150  | 13    | 396     | 53  |
| 54  | 0 | 0 | 34   | 193  | 60   | 62  | 47  | 21  | 9   | 15  | 63  | 13  | 1016  | 13    | 530     | 54  |
| 55  | 0 | 0 | 0    | 2    | 4    | 7   | 4   | 7   | 1   | 0   | 0   | 8   | 1512  | 1     | 34      | 55  |
| 56  | 0 | 0 | 8    | 13   | 9    | 4   | 0   | 1   | 0   | 0   | 8   | 0   | 1502  | 1     | 44      | 56  |
| 57  | 0 | 0 | 0    | 0    | 0    | 0   | 0   | 0   | 0   | 0   | 0   | 0   | 1543  | 3     | 3       | 57  |
| 58  | 0 | 0 | 0    | 0    | 0    | 0   | 0   | 0   | 0   | 0   | 0   | 0   | 1544  | 2     | 2       | 58  |
| 59  | 0 | 0 | 0    | 0    | 0    | 0   | 0   | 0   | 0   | 0   | 0   | 0   | 1546  | 0     | 0       | 59  |
| 60  | 0 | 0 | 0    | 0    | 0    | 0   | 0   | 0   | 0   | 0   | 0   | 0   | 1546  | 0     | 0       | 60  |
| 61  | 0 | 0 | 0    | 0    | 0    | 0   | 0   | 0   | 0   | 0   | 0   | 0   | 1546  | 0     | 0       | 61  |
| 62  | 0 | 0 | 0    | 0    | 0    | 0   | 0   | 0   | 0   | 0   | 0   | 0   | 1546  | 0     | 0       | 62  |
| 63  | 0 | 0 | 0    | 604  | 153  | 0   | 0   | 0   | 0   | 0   | 0   | 0   | 789   | 0     | 757     | 63  |
| 64  | 0 | 0 | 0    | 7    | 139  | 32  | 73  | 21  | 106 | 48  | 44  | 89  | 967   | 20    | 579     | 64  |
| 65  | 0 | 0 | 16   | 120  | 179  | 87  | 54  | 27  | 15  | 7   | 70  | 9   | 942   | 20    | 604     | 65  |
| 66  | 0 | 0 | 0    | 0    | 5    | 1   | 14  | 1   | 5   | 4   | 4   | 2   | 1509  | 1     | 37      | 66  |
| 67  | 0 | 0 | 0    | 8    | 11   | 6   | 5   | 7   | 0   | 0   | 4   | 0   | 1504  | 1     | 42      | 67  |
| 68  | 0 | 0 | 0    | 0    | 0    | 0   | 0   | 0   | 0   | 0   | 0   | 0   | 1539  | 7     | 7       | 68  |
| 69  | 0 | 0 | 0    | 0    | 0    | 0   | 0   | 0   | 0   | 0   | 0   | 0   | 1539  | 7     | 7       | 69  |
| 70  | 0 | 0 | 0    | 0    | 0    | 0   | 0   | 0   | 0   | 0   | 0   | 0   | 1545  | 1     | 1       | 70  |
| 71  | 0 | 0 | 0    | 0    | 0    | 0   | 0   | 0   | 0   | 0   | 0   | 0   | 1545  | 1     | 1       | 71  |
| 72  | 0 | 0 | 0    | 0    | 0    | 0   | 0   | 0   | 0   | 0   | 0   | 0   | 1546  | 0     | 0       | 72  |
| 73  | 0 | 0 | 0    | 0    | 0    | 0   | 0   | 0   | 0   | 0   | 0   | 0   | 1546  | 0     | 0       | 73  |
| 74  | 0 | 0 | 0    | 1337 | 206  | 0   | 0   | 0   | 0   | 0   | 0   | 3   | 0     | 0     | 1546    | 74  |
| 75  | 0 | 0 | 0    | 1329 | 213  | 1   | 0   | 0   | 0   | 0   | 0   | 3   | 0     | 0     | 1546    | 75  |
| 76  | 0 | 0 | 0    | 1180 | 354  | 5   | 0   | 0   | 0   | 0   | 0   | 6   | 1     | 0     | 1545    | 76  |
| 77  | 0 | 0 | 0    | 929  | 577  | 23  | 0   | 0   | 0   | 0   | 0   | 11  | 6     | 0     | 1540    | 77  |
| 78  | 0 | 0 | 0    | 664  | 780  | 28  | 0   | 0   | 0   | 0   | 0   | 45  | 29    | 0     | 1517    | 78  |
| 79  | 0 | 0 | 0    | 0    | 0    | 0   | 0   | 0   | 0   | 0   | 0   | 0   | 1546  | 0     | 0       | 79  |
| 80  | 0 | 0 | 0    | 0    | 1546 | 0   | 0   | 0   | 0   | 0   | 0   | 0   | 0     | 0     | 1546    | 80  |

Column Frequencies for USPEW1999-MILLENNIUM  
Source: The Roper Center, 05/07/2009

TYPE=MULTASC

FORM 1 CARD 3 (COL=80 )  
Records = 1546

| COL | & | - | 0    | 1    | 2   | 3    | 4   | 5   | 6   | 7   | 8   | 9   | BLANK | OTHER | NONBLNK | COL |
|-----|---|---|------|------|-----|------|-----|-----|-----|-----|-----|-----|-------|-------|---------|-----|
| 1   | 0 | 0 | 1546 | 0    | 0   | 0    | 0   | 0   | 0   | 0   | 0   | 0   | 0     | 0     | 1546    | 1   |
| 2   | 0 | 0 | 914  | 437  | 195 | 0    | 0   | 0   | 0   | 0   | 0   | 0   | 0     | 0     | 1546    | 2   |
| 3   | 0 | 0 | 230  | 194  | 146 | 210  | 161 | 152 | 153 | 131 | 80  | 89  | 0     | 0     | 1546    | 3   |
| 4   | 0 | 0 | 149  | 187  | 198 | 140  | 169 | 164 | 150 | 125 | 132 | 132 | 0     | 0     | 1546    | 4   |
| 5   | 0 | 0 | 152  | 149  | 164 | 156  | 148 | 147 | 169 | 134 | 159 | 168 | 0     | 0     | 1546    | 5   |
| 6   | 0 | 0 | 148  | 168  | 134 | 182  | 147 | 165 | 148 | 156 | 134 | 164 | 0     | 0     | 1546    | 6   |
| 7   | 0 | 0 | 0    | 1241 | 234 | 6    | 0   | 0   | 0   | 0   | 0   | 8   | 57    | 0     | 1489    | 7   |
| 8   | 0 | 0 | 0    | 1033 | 414 | 33   | 0   | 0   | 0   | 0   | 0   | 3   | 63    | 0     | 1483    | 8   |
| 9   | 0 | 0 | 0    | 817  | 459 | 163  | 0   | 0   | 0   | 0   | 0   | 11  | 96    | 0     | 1450    | 9   |
| 10  | 0 | 0 | 0    | 851  | 250 | 178  | 0   | 0   | 0   | 0   | 0   | 8   | 259   | 0     | 1287    | 10  |
| 11  | 0 | 0 | 0    | 667  | 373 | 63   | 0   | 0   | 0   | 0   | 0   | 6   | 437   | 0     | 1109    | 11  |
| 12  | 0 | 0 | 0    | 833  | 155 | 53   | 0   | 0   | 0   | 0   | 0   | 5   | 500   | 0     | 1046    | 12  |
| 13  | 0 | 0 | 0    | 236  | 507 | 240  | 0   | 0   | 0   | 0   | 0   | 10  | 553   | 0     | 993     | 13  |
| 14  | 0 | 0 | 0    | 302  | 282 | 166  | 0   | 0   | 0   | 0   | 0   | 3   | 793   | 0     | 753     | 14  |
| 15  | 0 | 0 | 0    | 232  | 294 | 56   | 0   | 0   | 0   | 0   | 0   | 5   | 959   | 0     | 587     | 15  |
| 16  | 0 | 0 | 0    | 240  | 232 | 55   | 0   | 0   | 0   | 0   | 0   | 4   | 1015  | 0     | 531     | 16  |
| 17  | 0 | 0 | 0    | 99   | 344 | 30   | 0   | 0   | 0   | 0   | 0   | 3   | 1070  | 0     | 476     | 17  |
| 18  | 0 | 0 | 0    | 50   | 265 | 127  | 0   | 0   | 0   | 0   | 0   | 4   | 1100  | 0     | 446     | 18  |
| 19  | 0 | 0 | 0    | 699  | 58  | 15   | 0   | 0   | 0   | 0   | 0   | 17  | 757   | 0     | 789     | 19  |
| 20  | 0 | 0 | 0    | 591  | 40  | 124  | 0   | 0   | 0   | 0   | 0   | 34  | 757   | 0     | 789     | 20  |
| 21  | 0 | 0 | 0    | 582  | 76  | 99   | 0   | 0   | 0   | 0   | 0   | 32  | 757   | 0     | 789     | 21  |
| 22  | 0 | 0 | 0    | 574  | 165 | 35   | 0   | 0   | 0   | 0   | 0   | 15  | 757   | 0     | 789     | 22  |
| 23  | 0 | 0 | 0    | 669  | 36  | 63   | 0   | 0   | 0   | 0   | 0   | 21  | 757   | 0     | 789     | 23  |
| 24  | 0 | 0 | 0    | 635  | 61  | 65   | 0   | 0   | 0   | 0   | 0   | 28  | 757   | 0     | 789     | 24  |
| 25  | 0 | 0 | 0    | 389  | 235 | 105  | 0   | 0   | 0   | 0   | 0   | 60  | 757   | 0     | 789     | 25  |
| 26  | 0 | 0 | 0    | 238  | 431 | 95   | 0   | 0   | 0   | 0   | 0   | 25  | 757   | 0     | 789     | 26  |
| 27  | 0 | 0 | 0    | 365  | 172 | 217  | 0   | 0   | 0   | 0   | 0   | 35  | 757   | 0     | 789     | 27  |
| 28  | 0 | 0 | 0    | 141  | 483 | 84   | 0   | 0   | 0   | 0   | 0   | 49  | 789   | 0     | 757     | 28  |
| 29  | 0 | 0 | 0    | 632  | 75  | 43   | 0   | 0   | 0   | 0   | 0   | 7   | 789   | 0     | 757     | 29  |
| 30  | 0 | 0 | 0    | 265  | 323 | 117  | 0   | 0   | 0   | 0   | 0   | 52  | 789   | 0     | 757     | 30  |
| 31  | 0 | 0 | 0    | 729  | 7   | 17   | 0   | 0   | 0   | 0   | 0   | 4   | 789   | 0     | 757     | 31  |
| 32  | 0 | 0 | 0    | 691  | 45  | 18   | 0   | 0   | 0   | 0   | 0   | 3   | 789   | 0     | 757     | 32  |
| 33  | 0 | 0 | 0    | 177  | 509 | 53   | 0   | 0   | 0   | 0   | 0   | 18  | 789   | 0     | 757     | 33  |
| 34  | 0 | 0 | 0    | 409  | 162 | 149  | 0   | 0   | 0   | 0   | 0   | 37  | 789   | 0     | 757     | 34  |
| 35  | 0 | 0 | 0    | 641  | 60  | 43   | 0   | 0   | 0   | 0   | 0   | 13  | 789   | 0     | 757     | 35  |
| 36  | 0 | 0 | 0    | 229  | 414 | 90   | 0   | 0   | 0   | 0   | 0   | 56  | 757   | 0     | 789     | 36  |
| 37  | 0 | 0 | 0    | 148  | 431 | 159  | 0   | 0   | 0   | 0   | 0   | 51  | 757   | 0     | 789     | 37  |
| 38  | 0 | 0 | 0    | 561  | 133 | 48   | 0   | 0   | 0   | 0   | 0   | 47  | 757   | 0     | 789     | 38  |
| 39  | 0 | 0 | 0    | 267  | 276 | 212  | 0   | 0   | 0   | 0   | 0   | 34  | 757   | 0     | 789     | 39  |
| 40  | 0 | 0 | 0    | 319  | 227 | 170  | 0   | 0   | 0   | 0   | 0   | 73  | 757   | 0     | 789     | 40  |
| 41  | 0 | 0 | 0    | 328  | 134 | 163  | 0   | 0   | 0   | 0   | 0   | 164 | 757   | 0     | 789     | 41  |
| 42  | 0 | 0 | 0    | 493  | 152 | 128  | 0   | 0   | 0   | 0   | 0   | 16  | 757   | 0     | 789     | 42  |
| 43  | 0 | 0 | 0    | 128  | 386 | 187  | 0   | 0   | 0   | 0   | 0   | 88  | 757   | 0     | 789     | 43  |
| 44  | 0 | 0 | 0    | 536  | 24  | 115  | 0   | 0   | 0   | 0   | 0   | 82  | 789   | 0     | 757     | 44  |
| 45  | 0 | 0 | 0    | 547  | 66  | 90   | 0   | 0   | 0   | 0   | 0   | 54  | 789   | 0     | 757     | 45  |
| 46  | 0 | 0 | 0    | 268  | 121 | 221  | 0   | 0   | 0   | 0   | 0   | 147 | 789   | 0     | 757     | 46  |
| 47  | 0 | 0 | 0    | 104  | 407 | 197  | 0   | 0   | 0   | 0   | 0   | 49  | 789   | 0     | 757     | 47  |
| 48  | 0 | 0 | 0    | 325  | 141 | 219  | 0   | 0   | 0   | 0   | 0   | 72  | 789   | 0     | 757     | 48  |
| 49  | 0 | 0 | 0    | 504  | 167 | 75   | 0   | 0   | 0   | 0   | 0   | 11  | 789   | 0     | 757     | 49  |
| 50  | 0 | 0 | 0    | 331  | 246 | 128  | 0   | 0   | 0   | 0   | 0   | 52  | 789   | 0     | 757     | 50  |
| 51  | 0 | 0 | 0    | 587  | 249 | 0    | 0   | 0   | 0   | 0   | 0   | 0   | 710   | 0     | 836     | 51  |
| 52  | 0 | 0 | 5    | 73   | 0   | 0    | 0   | 124 | 5   | 29  | 45  | 105 | 1148  | 12    | 398     | 52  |
| 53  | 0 | 0 | 99   | 118  | 34  | 53   | 17  | 80  | 47  | 15  | 74  | 40  | 957   | 12    | 589     | 53  |
| 54  | 0 | 0 | 0    | 4    | 0   | 0    | 0   | 14  | 0   | 0   | 1   | 6   | 1521  | 0     | 25      | 54  |
| 55  | 0 | 0 | 3    | 4    | 7   | 6    | 1   | 4   | 4   | 0   | 10  | 0   | 1507  | 0     | 39      | 55  |
| 56  | 0 | 0 | 0    | 0    | 0   | 0    | 0   | 1   | 0   | 0   | 0   | 0   | 1543  | 2     | 3       | 56  |
| 57  | 0 | 0 | 0    | 0    | 1   | 0    | 0   | 0   | 0   | 0   | 0   | 0   | 1543  | 2     | 3       | 57  |
| 58  | 0 | 0 | 0    | 0    | 0   | 0    | 0   | 0   | 0   | 0   | 0   | 0   | 1545  | 1     | 1       | 58  |
| 59  | 0 | 0 | 0    | 0    | 0   | 0    | 0   | 0   | 0   | 0   | 0   | 0   | 1545  | 1     | 1       | 59  |
| 60  | 0 | 0 | 0    | 0    | 0   | 0    | 0   | 0   | 0   | 0   | 0   | 0   | 1546  | 0     | 0       | 60  |
| 61  | 0 | 0 | 0    | 0    | 0   | 0    | 0   | 0   | 0   | 0   | 0   | 0   | 1546  | 0     | 0       | 61  |
| 62  | 0 | 0 | 0    | 512  | 324 | 0    | 0   | 0   | 0   | 0   | 0   | 0   | 710   | 0     | 836     | 62  |
| 63  | 0 | 0 | 12   | 9    | 9   | 14   | 3   | 12  | 39  | 27  | 4   | 78  | 1327  | 12    | 219     | 63  |
| 64  | 0 | 0 | 56   | 190  | 24  | 79   | 2   | 19  | 34  | 29  | 54  | 13  | 1034  | 12    | 512     | 64  |
| 65  | 0 | 0 | 0    | 0    | 1   | 6    | 0   | 1   | 1   | 0   | 0   | 6   | 1531  | 0     | 15      | 65  |
| 66  | 0 | 0 | 7    | 4    | 3   | 5    | 0   | 0   | 0   | 1   | 6   | 0   | 1520  | 0     | 26      | 66  |
| 67  | 0 | 0 | 0    | 0    | 0   | 0    | 0   | 0   | 0   | 0   | 0   | 0   | 1546  | 0     | 0       | 67  |
| 68  | 0 | 0 | 0    | 0    | 0   | 0    | 0   | 0   | 0   | 0   | 0   | 0   | 1546  | 0     | 0       | 68  |
| 69  | 0 | 0 | 0    | 0    | 0   | 0    | 0   | 0   | 0   | 0   | 0   | 0   | 1546  | 0     | 0       | 69  |
| 70  | 0 | 0 | 0    | 0    | 0   | 0    | 0   | 0   | 0   | 0   | 0   | 0   | 1546  | 0     | 0       | 70  |
| 71  | 0 | 0 | 0    | 0    | 0   | 0    | 0   | 0   | 0   | 0   | 0   | 0   | 1546  | 0     | 0       | 71  |
| 72  | 0 | 0 | 0    | 0    | 0   | 0    | 0   | 0   | 0   | 0   | 0   | 0   | 1546  | 0     | 0       | 72  |
| 73  | 0 | 0 | 0    | 583  | 253 | 0    | 0   | 0   | 0   | 0   | 0   | 0   | 710   | 0     | 836     | 73  |
| 74  | 0 | 0 | 0    | 0    | 319 | 17   | 2   | 6   | 23  | 33  | 0   | 98  | 1036  | 12    | 510     | 74  |
| 75  | 0 | 0 | 64   | 273  | 43  | 26   | 26  | 2   | 18  | 16  | 75  | 29  | 962   | 12    | 584     | 75  |
| 76  | 0 | 0 | 0    | 0    | 20  | 0    | 0   | 1   | 5   | 5   | 0   | 9   | 1506  | 0     | 40      | 76  |
| 77  | 0 | 0 | 11   | 13   | 3   | 5    | 0   | 0   | 2   | 2   | 11  | 4   | 1495  | 0     | 51      | 77  |
| 78  | 0 | 0 | 0    | 0    | 0   | 0    | 0   | 0   | 0   | 0   | 0   | 0   | 1546  | 0     | 0       | 78  |
| 79  | 0 | 0 | 0    | 0    | 0   | 0    | 0   | 0   | 0   | 0   | 0   | 0   | 1546  | 0     | 0       | 79  |
| 80  | 0 | 0 | 0    | 0    | 0   | 1546 | 0   | 0   | 0   | 0   | 0   | 0   | 0     | 0     | 1546    | 80  |



Column Frequencies for USPEW1999-MILLENNIUM  
Source: The Roper Center, 05/07/2009

TYPE=MULTASC

FORM 1 CARD 4 (COL=80 )  
Records = 1546

| COL | & | - | 0    | 1    | 2   | 3   | 4    | 5   | 6   | 7   | 8   | 9   | BLANK | OTHER | NONBLNK | COL |
|-----|---|---|------|------|-----|-----|------|-----|-----|-----|-----|-----|-------|-------|---------|-----|
| 1   | 0 | 0 | 1546 | 0    | 0   | 0   | 0    | 0   | 0   | 0   | 0   | 0   | 0     | 0     | 1546    | 1   |
| 2   | 0 | 0 | 914  | 437  | 195 | 0   | 0    | 0   | 0   | 0   | 0   | 0   | 0     | 0     | 1546    | 2   |
| 3   | 0 | 0 | 230  | 194  | 146 | 210 | 161  | 152 | 153 | 131 | 80  | 89  | 0     | 0     | 1546    | 3   |
| 4   | 0 | 0 | 149  | 187  | 198 | 140 | 169  | 164 | 150 | 125 | 132 | 132 | 0     | 0     | 1546    | 4   |
| 5   | 0 | 0 | 152  | 149  | 164 | 156 | 148  | 147 | 169 | 134 | 159 | 168 | 0     | 0     | 1546    | 5   |
| 6   | 0 | 0 | 148  | 168  | 134 | 182 | 147  | 165 | 148 | 156 | 134 | 164 | 0     | 0     | 1546    | 6   |
| 7   | 0 | 0 | 0    | 0    | 0   | 0   | 0    | 0   | 0   | 0   | 0   | 0   | 1544  | 2     | 2       | 7   |
| 8   | 0 | 0 | 0    | 0    | 0   | 0   | 0    | 0   | 0   | 0   | 0   | 0   | 1544  | 2     | 2       | 8   |
| 9   | 0 | 0 | 0    | 0    | 0   | 0   | 0    | 0   | 0   | 0   | 0   | 0   | 1546  | 0     | 0       | 9   |
| 10  | 0 | 0 | 0    | 0    | 0   | 0   | 0    | 0   | 0   | 0   | 0   | 0   | 1546  | 0     | 0       | 10  |
| 11  | 0 | 0 | 0    | 0    | 0   | 0   | 0    | 0   | 0   | 0   | 0   | 0   | 1546  | 0     | 0       | 11  |
| 12  | 0 | 0 | 0    | 0    | 0   | 0   | 0    | 0   | 0   | 0   | 0   | 0   | 1546  | 0     | 0       | 12  |
| 13  | 0 | 0 | 0    | 643  | 193 | 0   | 0    | 0   | 0   | 0   | 0   | 0   | 710   | 0     | 836     | 13  |
| 14  | 0 | 0 | 9    | 15   | 212 | 33  | 32   | 5   | 29  | 10  | 16  | 104 | 1064  | 17    | 482     | 14  |
| 15  | 0 | 0 | 91   | 51   | 42  | 108 | 122  | 44  | 47  | 12  | 79  | 30  | 904   | 16    | 642     | 15  |
| 16  | 0 | 0 | 0    | 0    | 6   | 3   | 11   | 1   | 2   | 1   | 1   | 13  | 1508  | 0     | 38      | 16  |
| 17  | 0 | 0 | 13   | 4    | 7   | 3   | 5    | 1   | 7   | 1   | 10  | 1   | 1494  | 0     | 52      | 17  |
| 18  | 0 | 0 | 0    | 0    | 1   | 0   | 0    | 1   | 0   | 0   | 0   | 0   | 1544  | 0     | 2       | 18  |
| 19  | 0 | 0 | 0    | 0    | 0   | 0   | 0    | 0   | 1   | 1   | 0   | 0   | 1544  | 0     | 2       | 19  |
| 20  | 0 | 0 | 0    | 0    | 0   | 0   | 0    | 0   | 0   | 0   | 0   | 0   | 1546  | 0     | 0       | 20  |
| 21  | 0 | 0 | 0    | 0    | 0   | 0   | 0    | 0   | 0   | 0   | 0   | 0   | 1546  | 0     | 0       | 21  |
| 22  | 0 | 0 | 0    | 0    | 0   | 0   | 0    | 0   | 0   | 0   | 0   | 0   | 1546  | 0     | 0       | 22  |
| 23  | 0 | 0 | 0    | 0    | 0   | 0   | 0    | 0   | 0   | 0   | 0   | 0   | 1546  | 0     | 0       | 23  |
| 24  | 0 | 0 | 0    | 681  | 121 | 0   | 0    | 0   | 0   | 0   | 0   | 0   | 744   | 0     | 802     | 24  |
| 25  | 0 | 0 | 8    | 35   | 124 | 3   | 32   | 4   | 109 | 58  | 0   | 111 | 1046  | 16    | 500     | 25  |
| 26  | 0 | 0 | 11   | 180  | 37  | 8   | 19   | 96  | 117 | 40  | 134 | 23  | 865   | 16    | 681     | 26  |
| 27  | 0 | 0 | 0    | 1    | 11  | 0   | 2    | 0   | 3   | 6   | 0   | 7   | 1516  | 0     | 30      | 27  |
| 28  | 0 | 0 | 0    | 10   | 3   | 5   | 2    | 9   | 5   | 2   | 7   | 3   | 1500  | 0     | 46      | 28  |
| 29  | 0 | 0 | 0    | 0    | 1   | 0   | 0    | 0   | 0   | 0   | 0   | 0   | 1543  | 2     | 3       | 29  |
| 30  | 0 | 0 | 0    | 0    | 1   | 0   | 0    | 0   | 0   | 0   | 0   | 0   | 1543  | 2     | 3       | 30  |
| 31  | 0 | 0 | 0    | 0    | 0   | 0   | 0    | 0   | 0   | 0   | 0   | 0   | 1545  | 1     | 1       | 31  |
| 32  | 0 | 0 | 0    | 0    | 0   | 0   | 0    | 0   | 0   | 0   | 0   | 0   | 1545  | 1     | 1       | 32  |
| 33  | 0 | 0 | 0    | 0    | 0   | 0   | 0    | 0   | 0   | 0   | 0   | 0   | 1546  | 0     | 0       | 33  |
| 34  | 0 | 0 | 0    | 0    | 0   | 0   | 0    | 0   | 0   | 0   | 0   | 0   | 1546  | 0     | 0       | 34  |
| 35  | 0 | 0 | 0    | 641  | 161 | 0   | 0    | 0   | 0   | 0   | 0   | 0   | 744   | 0     | 802     | 35  |
| 36  | 0 | 0 | 0    | 149  | 30  | 17  | 183  | 88  | 29  | 23  | 0   | 92  | 916   | 19    | 630     | 36  |
| 37  | 0 | 0 | 98   | 31   | 35  | 43  | 43   | 120 | 19  | 50  | 127 | 56  | 906   | 18    | 640     | 37  |
| 38  | 0 | 0 | 0    | 12   | 4   | 4   | 5    | 1   | 0   | 1   | 0   | 6   | 1513  | 0     | 33      | 38  |
| 39  | 0 | 0 | 5    | 4    | 3   | 2   | 1    | 4   | 2   | 4   | 7   | 1   | 1513  | 0     | 33      | 39  |
| 40  | 0 | 0 | 0    | 0    | 0   | 0   | 0    | 0   | 0   | 0   | 0   | 0   | 1544  | 2     | 2       | 40  |
| 41  | 0 | 0 | 0    | 0    | 0   | 0   | 0    | 0   | 0   | 0   | 0   | 0   | 1544  | 2     | 2       | 41  |
| 42  | 0 | 0 | 0    | 0    | 0   | 0   | 0    | 0   | 0   | 0   | 0   | 0   | 1546  | 0     | 0       | 42  |
| 43  | 0 | 0 | 0    | 0    | 0   | 0   | 0    | 0   | 0   | 0   | 0   | 0   | 1546  | 0     | 0       | 43  |
| 44  | 0 | 0 | 0    | 0    | 0   | 0   | 0    | 0   | 0   | 0   | 0   | 0   | 1546  | 0     | 0       | 44  |
| 45  | 0 | 0 | 0    | 0    | 0   | 0   | 0    | 0   | 0   | 0   | 0   | 0   | 1546  | 0     | 0       | 45  |
| 46  | 0 | 0 | 0    | 658  | 144 | 0   | 0    | 0   | 0   | 0   | 0   | 0   | 744   | 0     | 802     | 46  |
| 47  | 0 | 0 | 0    | 63   | 67  | 29  | 50   | 174 | 40  | 53  | 25  | 115 | 914   | 16    | 632     | 47  |
| 48  | 0 | 0 | 37   | 108  | 43  | 68  | 19   | 158 | 31  | 41  | 92  | 45  | 888   | 16    | 658     | 48  |
| 49  | 0 | 0 | 0    | 2    | 5   | 0   | 10   | 4   | 2   | 4   | 1   | 9   | 1509  | 0     | 37      | 49  |
| 50  | 0 | 0 | 2    | 6    | 6   | 5   | 2    | 5   | 1   | 2   | 8   | 2   | 1507  | 0     | 39      | 50  |
| 51  | 0 | 0 | 0    | 0    | 0   | 0   | 0    | 0   | 0   | 0   | 0   | 0   | 1542  | 4     | 4       | 51  |
| 52  | 0 | 0 | 0    | 0    | 0   | 0   | 0    | 0   | 0   | 0   | 0   | 0   | 1542  | 4     | 4       | 52  |
| 53  | 0 | 0 | 0    | 0    | 0   | 0   | 0    | 0   | 0   | 0   | 0   | 0   | 1545  | 1     | 1       | 53  |
| 54  | 0 | 0 | 0    | 0    | 0   | 0   | 0    | 0   | 0   | 0   | 0   | 0   | 1545  | 1     | 1       | 54  |
| 55  | 0 | 0 | 0    | 0    | 0   | 0   | 0    | 0   | 0   | 0   | 0   | 0   | 1546  | 0     | 0       | 55  |
| 56  | 0 | 0 | 0    | 0    | 0   | 0   | 0    | 0   | 0   | 0   | 0   | 0   | 1546  | 0     | 0       | 56  |
| 57  | 0 | 0 | 0    | 713  | 89  | 0   | 0    | 0   | 0   | 0   | 0   | 0   | 744   | 0     | 802     | 57  |
| 58  | 0 | 0 | 2    | 30   | 40  | 107 | 20   | 3   | 118 | 201 | 44  | 110 | 850   | 21    | 696     | 58  |
| 59  | 0 | 0 | 75   | 159  | 61  | 128 | 10   | 95  | 12  | 38  | 108 | 6   | 833   | 21    | 713     | 59  |
| 60  | 0 | 0 | 0    | 8    | 4   | 9   | 1    | 3   | 4   | 5   | 5   | 12  | 1494  | 1     | 52      | 60  |
| 61  | 0 | 0 | 4    | 13   | 9   | 5   | 1    | 5   | 3   | 4   | 11  | 0   | 1490  | 1     | 56      | 61  |
| 62  | 0 | 0 | 0    | 0    | 0   | 1   | 0    | 0   | 0   | 0   | 0   | 0   | 1540  | 5     | 6       | 62  |
| 63  | 0 | 0 | 0    | 0    | 0   | 0   | 0    | 0   | 0   | 1   | 0   | 0   | 1540  | 5     | 6       | 63  |
| 64  | 0 | 0 | 0    | 0    | 0   | 0   | 0    | 0   | 0   | 0   | 0   | 1   | 1545  | 0     | 1       | 64  |
| 65  | 0 | 0 | 0    | 0    | 0   | 0   | 0    | 0   | 0   | 0   | 1   | 0   | 1545  | 0     | 1       | 65  |
| 66  | 0 | 0 | 0    | 0    | 0   | 0   | 0    | 0   | 0   | 0   | 0   | 0   | 1546  | 0     | 0       | 66  |
| 67  | 0 | 0 | 0    | 0    | 0   | 0   | 0    | 0   | 0   | 0   | 0   | 0   | 1546  | 0     | 0       | 67  |
| 68  | 0 | 0 | 0    | 1219 | 225 | 63  | 0    | 0   | 0   | 0   | 0   | 39  | 0     | 0     | 1546    | 68  |
| 69  | 0 | 0 | 0    | 1272 | 173 | 56  | 0    | 0   | 0   | 0   | 0   | 45  | 0     | 0     | 1546    | 69  |
| 70  | 0 | 0 | 0    | 1122 | 299 | 89  | 0    | 0   | 0   | 0   | 0   | 36  | 0     | 0     | 1546    | 70  |
| 71  | 0 | 0 | 0    | 646  | 444 | 306 | 0    | 0   | 0   | 0   | 0   | 150 | 0     | 0     | 1546    | 71  |
| 72  | 0 | 0 | 0    | 364  | 472 | 684 | 0    | 0   | 0   | 0   | 0   | 26  | 0     | 0     | 1546    | 72  |
| 73  | 0 | 0 | 0    | 985  | 238 | 261 | 0    | 0   | 0   | 0   | 0   | 62  | 0     | 0     | 1546    | 73  |
| 74  | 0 | 0 | 0    | 781  | 487 | 208 | 0    | 0   | 0   | 0   | 0   | 70  | 0     | 0     | 1546    | 74  |
| 75  | 0 | 0 | 0    | 1307 | 165 | 55  | 0    | 0   | 0   | 0   | 0   | 19  | 0     | 0     | 1546    | 75  |
| 76  | 0 | 0 | 0    | 1324 | 151 | 57  | 0    | 0   | 0   | 0   | 0   | 14  | 0     | 0     | 1546    | 76  |
| 77  | 0 | 0 | 0    | 639  | 508 | 348 | 0    | 0   | 0   | 0   | 0   | 51  | 0     | 0     | 1546    | 77  |
| 78  | 0 | 0 | 0    | 1086 | 328 | 109 | 0    | 0   | 0   | 0   | 0   | 23  | 0     | 0     | 1546    | 78  |
| 79  | 0 | 0 | 0    | 0    | 0   | 0   | 0    | 0   | 0   | 0   | 0   | 0   | 1546  | 0     | 0       | 79  |
| 80  | 0 | 0 | 0    | 0    | 0   | 0   | 1546 | 0   | 0   | 0   | 0   | 0   | 0     | 0     | 1546    | 80  |

Column Frequencies for USPEW1999-MILLENNIUM  
Source: The Roper Center, 05/07/2009

TYPE=MULTASC

FORM 1 CARD 5 (COL=80 )

Records = 1546

| COL | & | - | 0    | 1    | 2    | 3   | 4   | 5    | 6   | 7   | 8   | 9   | BLANK | OTHER | NONBLNK | COL |
|-----|---|---|------|------|------|-----|-----|------|-----|-----|-----|-----|-------|-------|---------|-----|
| 1   | 0 | 0 | 1546 | 0    | 0    | 0   | 0   | 0    | 0   | 0   | 0   | 0   | 0     | 0     | 1546    | 1   |
| 2   | 0 | 0 | 914  | 437  | 195  | 0   | 0   | 0    | 0   | 0   | 0   | 0   | 0     | 0     | 1546    | 2   |
| 3   | 0 | 0 | 230  | 194  | 146  | 210 | 161 | 152  | 153 | 131 | 80  | 89  | 0     | 0     | 1546    | 3   |
| 4   | 0 | 0 | 149  | 187  | 198  | 140 | 169 | 164  | 150 | 125 | 132 | 132 | 0     | 0     | 1546    | 4   |
| 5   | 0 | 0 | 152  | 149  | 164  | 156 | 148 | 147  | 169 | 134 | 159 | 168 | 0     | 0     | 1546    | 5   |
| 6   | 0 | 0 | 148  | 168  | 134  | 182 | 147 | 165  | 148 | 156 | 134 | 164 | 0     | 0     | 1546    | 6   |
| 7   | 0 | 0 | 0    | 817  | 411  | 270 | 0   | 0    | 0   | 0   | 0   | 48  | 0     | 0     | 1546    | 7   |
| 8   | 0 | 0 | 0    | 1075 | 312  | 127 | 0   | 0    | 0   | 0   | 0   | 32  | 0     | 0     | 1546    | 8   |
| 9   | 0 | 0 | 0    | 206  | 1225 | 0   | 0   | 0    | 0   | 0   | 0   | 115 | 0     | 0     | 1546    | 9   |
| 10  | 0 | 0 | 0    | 17   | 67   | 0   | 0   | 0    | 0   | 0   | 0   | 7   | 1455  | 0     | 91      | 10  |
| 11  | 0 | 0 | 0    | 1086 | 254  | 0   | 0   | 0    | 0   | 0   | 0   | 206 | 0     | 0     | 1546    | 11  |
| 12  | 0 | 0 | 0    | 801  | 390  | 0   | 0   | 0    | 0   | 0   | 0   | 355 | 0     | 0     | 1546    | 12  |
| 13  | 0 | 0 | 0    | 146  | 1148 | 0   | 0   | 0    | 0   | 0   | 0   | 252 | 0     | 0     | 1546    | 13  |
| 14  | 0 | 0 | 0    | 1018 | 240  | 0   | 0   | 0    | 0   | 0   | 0   | 288 | 0     | 0     | 1546    | 14  |
| 15  | 0 | 0 | 0    | 197  | 1171 | 0   | 0   | 0    | 0   | 0   | 0   | 178 | 0     | 0     | 1546    | 15  |
| 16  | 0 | 0 | 0    | 29   | 22   | 0   | 0   | 0    | 0   | 0   | 0   | 40  | 1455  | 0     | 91      | 16  |
| 17  | 0 | 0 | 0    | 509  | 994  | 0   | 0   | 0    | 0   | 0   | 0   | 43  | 0     | 0     | 1546    | 17  |
| 18  | 0 | 0 | 0    | 1213 | 319  | 0   | 0   | 0    | 0   | 0   | 0   | 14  | 0     | 0     | 1546    | 18  |
| 19  | 0 | 0 | 0    | 1036 | 499  | 0   | 0   | 0    | 0   | 0   | 0   | 11  | 0     | 0     | 1546    | 19  |
| 20  | 0 | 0 | 0    | 661  | 873  | 0   | 0   | 0    | 0   | 0   | 0   | 12  | 0     | 0     | 1546    | 20  |
| 21  | 0 | 0 | 0    | 394  | 1143 | 0   | 0   | 0    | 0   | 0   | 0   | 9   | 0     | 0     | 1546    | 21  |
| 22  | 0 | 0 | 0    | 392  | 2    | 0   | 0   | 0    | 0   | 0   | 0   | 0   | 1152  | 0     | 394     | 22  |
| 23  | 0 | 0 | 2    | 3    | 22   | 88  | 10  | 4    | 13  | 0   | 11  | 72  | 1311  | 10    | 235     | 23  |
| 24  | 0 | 0 | 34   | 91   | 101  | 40  | 15  | 68   | 6   | 0   | 18  | 9   | 1154  | 10    | 392     | 24  |
| 25  | 0 | 0 | 0    | 1    | 13   | 27  | 7   | 2    | 3   | 0   | 4   | 12  | 1477  | 0     | 69      | 25  |
| 26  | 0 | 0 | 7    | 25   | 18   | 16  | 3   | 12   | 8   | 0   | 8   | 5   | 1444  | 0     | 102     | 26  |
| 27  | 0 | 0 | 0    | 1    | 0    | 0   | 0   | 0    | 0   | 0   | 0   | 0   | 1528  | 17    | 18      | 27  |
| 28  | 0 | 0 | 0    | 0    | 0    | 0   | 0   | 0    | 0   | 0   | 1   | 0   | 1528  | 17    | 18      | 28  |
| 29  | 0 | 0 | 0    | 0    | 0    | 0   | 0   | 0    | 0   | 0   | 0   | 0   | 1543  | 3     | 3       | 29  |
| 30  | 0 | 0 | 0    | 0    | 0    | 0   | 0   | 0    | 0   | 0   | 0   | 0   | 1543  | 3     | 3       | 30  |
| 31  | 0 | 0 | 0    | 0    | 0    | 0   | 0   | 0    | 0   | 0   | 0   | 0   | 1545  | 1     | 1       | 31  |
| 32  | 0 | 0 | 0    | 0    | 0    | 0   | 0   | 0    | 0   | 0   | 0   | 0   | 1545  | 1     | 1       | 32  |
| 33  | 0 | 0 | 0    | 637  | 648  | 151 | 64  | 0    | 0   | 0   | 0   | 46  | 0     | 0     | 1546    | 33  |
| 34  | 0 | 0 | 0    | 367  | 730  | 312 | 94  | 0    | 0   | 0   | 0   | 43  | 0     | 0     | 1546    | 34  |
| 35  | 0 | 0 | 0    | 598  | 947  | 0   | 0   | 0    | 0   | 0   | 0   | 1   | 0     | 0     | 1546    | 35  |
| 36  | 0 | 0 | 0    | 406  | 122  | 43  | 0   | 0    | 0   | 0   | 0   | 27  | 948   | 0     | 598     | 36  |
| 37  | 0 | 0 | 0    | 846  | 524  | 64  | 0   | 0    | 0   | 0   | 0   | 81  | 31    | 0     | 1515    | 37  |
| 38  | 0 | 0 | 0    | 778  | 768  | 0   | 0   | 0    | 0   | 0   | 0   | 0   | 0     | 0     | 1546    | 38  |
| 39  | 0 | 0 | 0    | 1385 | 127  | 20  | 0   | 0    | 0   | 0   | 0   | 14  | 0     | 0     | 1546    | 39  |
| 40  | 0 | 0 | 0    | 808  | 539  | 135 | 0   | 0    | 0   | 0   | 0   | 64  | 0     | 0     | 1546    | 40  |
| 41  | 0 | 0 | 0    | 687  | 713  | 121 | 0   | 0    | 0   | 0   | 0   | 25  | 0     | 0     | 1546    | 41  |
| 42  | 0 | 0 | 0    | 691  | 650  | 168 | 0   | 0    | 0   | 0   | 0   | 37  | 0     | 0     | 1546    | 42  |
| 43  | 0 | 0 | 0    | 1244 | 251  | 40  | 0   | 0    | 0   | 0   | 0   | 11  | 0     | 0     | 1546    | 43  |
| 44  | 0 | 0 | 0    | 496  | 236  | 40  | 0   | 0    | 0   | 0   | 0   | 17  | 757   | 0     | 789     | 44  |
| 45  | 0 | 0 | 0    | 504  | 203  | 41  | 0   | 0    | 0   | 0   | 0   | 9   | 789   | 0     | 757     | 45  |
| 46  | 0 | 0 | 0    | 725  | 634  | 168 | 0   | 0    | 0   | 0   | 0   | 19  | 0     | 0     | 1546    | 46  |
| 47  | 0 | 0 | 0    | 801  | 598  | 120 | 0   | 0    | 0   | 0   | 0   | 27  | 0     | 0     | 1546    | 47  |
| 48  | 0 | 0 | 0    | 1317 | 194  | 22  | 0   | 0    | 0   | 0   | 0   | 13  | 0     | 0     | 1546    | 48  |
| 49  | 0 | 0 | 0    | 483  | 626  | 412 | 0   | 0    | 0   | 0   | 0   | 25  | 0     | 0     | 1546    | 49  |
| 50  | 0 | 0 | 0    | 628  | 599  | 300 | 0   | 0    | 0   | 0   | 0   | 19  | 0     | 0     | 1546    | 50  |
| 51  | 0 | 0 | 0    | 339  | 278  | 152 | 0   | 0    | 0   | 0   | 0   | 20  | 757   | 0     | 789     | 51  |
| 52  | 0 | 0 | 0    | 336  | 244  | 162 | 0   | 0    | 0   | 0   | 0   | 15  | 789   | 0     | 757     | 52  |
| 53  | 0 | 0 | 0    | 527  | 506  | 468 | 0   | 0    | 0   | 0   | 0   | 45  | 0     | 0     | 1546    | 53  |
| 54  | 0 | 0 | 0    | 679  | 572  | 269 | 0   | 0    | 0   | 0   | 0   | 26  | 0     | 0     | 1546    | 54  |
| 55  | 0 | 0 | 0    | 546  | 584  | 342 | 0   | 0    | 0   | 0   | 0   | 74  | 0     | 0     | 1546    | 55  |
| 56  | 0 | 0 | 0    | 778  | 549  | 199 | 0   | 0    | 0   | 0   | 0   | 20  | 0     | 0     | 1546    | 56  |
| 57  | 0 | 0 | 0    | 460  | 651  | 398 | 0   | 0    | 0   | 0   | 0   | 37  | 0     | 0     | 1546    | 57  |
| 58  | 0 | 0 | 0    | 989  | 473  | 56  | 0   | 0    | 0   | 0   | 0   | 28  | 0     | 0     | 1546    | 58  |
| 59  | 0 | 0 | 0    | 596  | 745  | 158 | 0   | 0    | 0   | 0   | 0   | 47  | 0     | 0     | 1546    | 59  |
| 60  | 0 | 0 | 0    | 694  | 679  | 156 | 0   | 0    | 0   | 0   | 0   | 17  | 0     | 0     | 1546    | 60  |
| 61  | 0 | 0 | 0    | 593  | 710  | 193 | 0   | 0    | 0   | 0   | 0   | 50  | 0     | 0     | 1546    | 61  |
| 62  | 0 | 0 | 0    | 1027 | 427  | 68  | 0   | 0    | 0   | 0   | 0   | 24  | 0     | 0     | 1546    | 62  |
| 63  | 0 | 0 | 0    | 448  | 294  | 19  | 0   | 0    | 0   | 0   | 0   | 28  | 757   | 0     | 789     | 63  |
| 64  | 0 | 0 | 0    | 506  | 242  | 19  | 0   | 0    | 0   | 0   | 0   | 22  | 757   | 0     | 789     | 64  |
| 65  | 0 | 0 | 0    | 521  | 238  | 15  | 0   | 0    | 0   | 0   | 0   | 15  | 757   | 0     | 789     | 65  |
| 66  | 0 | 0 | 0    | 328  | 400  | 40  | 0   | 0    | 0   | 0   | 0   | 21  | 757   | 0     | 789     | 66  |
| 67  | 0 | 0 | 0    | 517  | 242  | 8   | 0   | 0    | 0   | 0   | 0   | 22  | 757   | 0     | 789     | 67  |
| 68  | 0 | 0 | 0    | 271  | 459  | 8   | 0   | 0    | 0   | 0   | 0   | 19  | 789   | 0     | 757     | 68  |
| 69  | 0 | 0 | 0    | 522  | 202  | 22  | 0   | 0    | 0   | 0   | 0   | 11  | 789   | 0     | 757     | 69  |
| 70  | 0 | 0 | 0    | 442  | 303  | 11  | 0   | 0    | 0   | 0   | 0   | 1   | 789   | 0     | 757     | 70  |
| 71  | 0 | 0 | 0    | 521  | 207  | 13  | 0   | 0    | 0   | 0   | 0   | 16  | 789   | 0     | 757     | 71  |
| 72  | 0 | 0 | 0    | 325  | 326  | 446 | 270 | 0    | 0   | 0   | 0   | 179 | 0     | 0     | 1546    | 72  |
| 73  | 0 | 0 | 0    | 54   | 223  | 387 | 92  | 0    | 0   | 0   | 0   | 33  | 757   | 0     | 789     | 73  |
| 74  | 0 | 0 | 0    | 62   | 223  | 365 | 92  | 0    | 0   | 0   | 0   | 15  | 789   | 0     | 757     | 74  |
| 75  | 0 | 0 | 0    | 205  | 771  | 438 | 66  | 0    | 0   | 0   | 0   | 66  | 0     | 0     | 1546    | 75  |
| 76  | 0 | 0 | 0    | 223  | 735  | 483 | 65  | 0    | 0   | 0   | 0   | 40  | 0     | 0     | 1546    | 76  |
| 77  | 0 | 0 | 0    | 223  | 383  | 126 | 22  | 0    | 0   | 0   | 0   | 35  | 757   | 0     | 789     | 77  |
| 78  | 0 | 0 | 0    | 148  | 446  | 139 | 17  | 0    | 0   | 0   | 0   | 7   | 789   | 0     | 757     | 78  |
| 79  | 0 | 0 | 0    | 0    | 0    | 0   | 0   | 0    | 0   | 0   | 0   | 0   | 1546  | 0     | 0       | 79  |
| 80  | 0 | 0 | 0    | 0    | 0    | 0   | 0   | 1546 | 0   | 0   | 0   | 0   | 0     | 0     | 1546    | 80  |

Column Frequencies for USPEW1999-MILLENNIUM  
Source: The Roper Center, 05/07/2009

TYPE=MULTASC

FORM 1 CARD 6 (COL=80 )  
Records = 1546

| COL | & | - | 0    | 1    | 2    | 3   | 4    | 5   | 6    | 7   | 8   | 9   | BLANK | OTHER | NONBLNK | COL |
|-----|---|---|------|------|------|-----|------|-----|------|-----|-----|-----|-------|-------|---------|-----|
| 1   | 0 | 0 | 1546 | 0    | 0    | 0   | 0    | 0   | 0    | 0   | 0   | 0   | 0     | 0     | 1546    | 1   |
| 2   | 0 | 0 | 914  | 437  | 195  | 0   | 0    | 0   | 0    | 0   | 0   | 0   | 0     | 0     | 1546    | 2   |
| 3   | 0 | 0 | 230  | 194  | 146  | 210 | 161  | 152 | 153  | 131 | 80  | 89  | 0     | 0     | 1546    | 3   |
| 4   | 0 | 0 | 149  | 187  | 198  | 140 | 169  | 164 | 150  | 125 | 132 | 132 | 0     | 0     | 1546    | 4   |
| 5   | 0 | 0 | 152  | 149  | 164  | 156 | 148  | 147 | 169  | 134 | 159 | 168 | 0     | 0     | 1546    | 5   |
| 6   | 0 | 0 | 148  | 168  | 134  | 182 | 147  | 165 | 148  | 156 | 134 | 164 | 0     | 0     | 1546    | 6   |
| 7   | 0 | 0 | 0    | 38   | 189  | 388 | 119  | 0   | 0    | 0   | 0   | 55  | 757   | 0     | 789     | 7   |
| 8   | 0 | 0 | 0    | 33   | 170  | 320 | 203  | 0   | 0    | 0   | 0   | 31  | 789   | 0     | 757     | 8   |
| 9   | 0 | 0 | 0    | 100  | 341  | 264 | 69   | 0   | 0    | 0   | 0   | 15  | 757   | 0     | 789     | 9   |
| 10  | 0 | 0 | 0    | 132  | 438  | 130 | 42   | 0   | 0    | 0   | 0   | 15  | 789   | 0     | 757     | 10  |
| 11  | 0 | 0 | 0    | 212  | 604  | 572 | 128  | 0   | 0    | 0   | 0   | 30  | 0     | 0     | 1546    | 11  |
| 12  | 0 | 0 | 0    | 102  | 335  | 276 | 49   | 0   | 0    | 0   | 0   | 27  | 757   | 0     | 789     | 12  |
| 13  | 0 | 0 | 0    | 149  | 453  | 121 | 26   | 0   | 0    | 0   | 0   | 8   | 789   | 0     | 757     | 13  |
| 14  | 0 | 0 | 0    | 559  | 844  | 79  | 16   | 0   | 0    | 0   | 0   | 48  | 0     | 0     | 1546    | 14  |
| 15  | 0 | 0 | 0    | 354  | 897  | 246 | 33   | 0   | 0    | 0   | 0   | 16  | 0     | 0     | 1546    | 15  |
| 16  | 0 | 0 | 0    | 46   | 277  | 292 | 116  | 0   | 0    | 0   | 0   | 58  | 757   | 0     | 789     | 16  |
| 17  | 0 | 0 | 0    | 50   | 273  | 270 | 118  | 0   | 0    | 0   | 0   | 46  | 789   | 0     | 757     | 17  |
| 18  | 0 | 0 | 0    | 142  | 391  | 187 | 38   | 0   | 0    | 0   | 0   | 31  | 757   | 0     | 789     | 18  |
| 19  | 0 | 0 | 0    | 95   | 239  | 327 | 76   | 0   | 0    | 0   | 0   | 20  | 789   | 0     | 757     | 19  |
| 20  | 0 | 0 | 0    | 222  | 421  | 118 | 23   | 0   | 0    | 0   | 0   | 5   | 757   | 0     | 789     | 20  |
| 21  | 0 | 0 | 0    | 121  | 456  | 135 | 34   | 0   | 0    | 0   | 0   | 11  | 789   | 0     | 757     | 21  |
| 22  | 0 | 0 | 0    | 161  | 471  | 109 | 16   | 0   | 0    | 0   | 0   | 32  | 757   | 0     | 789     | 22  |
| 23  | 0 | 0 | 0    | 64   | 246  | 368 | 56   | 0   | 0    | 0   | 0   | 23  | 789   | 0     | 757     | 23  |
| 24  | 0 | 0 | 0    | 189  | 601  | 502 | 208  | 0   | 0    | 0   | 0   | 46  | 0     | 0     | 1546    | 24  |
| 25  | 0 | 0 | 0    | 570  | 940  | 0   | 0    | 0   | 0    | 0   | 0   | 36  | 0     | 0     | 1546    | 25  |
| 26  | 0 | 0 | 0    | 421  | 322  | 24  | 0    | 0   | 0    | 0   | 0   | 22  | 757   | 0     | 789     | 26  |
| 27  | 0 | 0 | 0    | 301  | 454  | 11  | 0    | 0   | 0    | 0   | 0   | 23  | 757   | 0     | 789     | 27  |
| 28  | 0 | 0 | 0    | 291  | 483  | 5   | 0    | 0   | 0    | 0   | 0   | 10  | 757   | 0     | 789     | 28  |
| 29  | 0 | 0 | 0    | 526  | 224  | 24  | 0    | 0   | 0    | 0   | 0   | 15  | 757   | 0     | 789     | 29  |
| 30  | 0 | 0 | 0    | 499  | 201  | 53  | 0    | 0   | 0    | 0   | 0   | 36  | 757   | 0     | 789     | 30  |
| 31  | 0 | 0 | 0    | 353  | 389  | 21  | 0    | 0   | 0    | 0   | 0   | 26  | 757   | 0     | 789     | 31  |
| 32  | 0 | 0 | 0    | 251  | 468  | 28  | 0    | 0   | 0    | 0   | 0   | 10  | 789   | 0     | 757     | 32  |
| 33  | 0 | 0 | 0    | 327  | 391  | 15  | 0    | 0   | 0    | 0   | 0   | 24  | 789   | 0     | 757     | 33  |
| 34  | 0 | 0 | 0    | 381  | 361  | 9   | 0    | 0   | 0    | 0   | 0   | 6   | 789   | 0     | 757     | 34  |
| 35  | 0 | 0 | 0    | 186  | 537  | 18  | 0    | 0   | 0    | 0   | 0   | 16  | 789   | 0     | 757     | 35  |
| 36  | 0 | 0 | 0    | 167  | 497  | 59  | 0    | 0   | 0    | 0   | 0   | 34  | 789   | 0     | 757     | 36  |
| 37  | 0 | 0 | 0    | 351  | 363  | 27  | 0    | 0   | 0    | 0   | 0   | 16  | 789   | 0     | 757     | 37  |
| 38  | 0 | 0 | 0    | 1159 | 382  | 0   | 0    | 0   | 0    | 0   | 0   | 5   | 0     | 0     | 1546    | 38  |
| 39  | 0 | 0 | 0    | 867  | 291  | 0   | 0    | 0   | 0    | 0   | 0   | 1   | 387   | 0     | 1159    | 39  |
| 40  | 0 | 0 | 0    | 65   | 309  | 284 | 323  | 259 | 131  | 111 | 38  | 26  | 0     | 0     | 1546    | 40  |
| 41  | 0 | 0 | 202  | 131  | 147  | 131 | 128  | 158 | 133  | 140 | 207 | 169 | 0     | 0     | 1546    | 41  |
| 42  | 0 | 0 | 0    | 21   | 123  | 482 | 64   | 383 | 296  | 174 | 0   | 3   | 0     | 0     | 1546    | 42  |
| 43  | 0 | 0 | 0    | 107  | 1433 | 0   | 0    | 0   | 0    | 0   | 0   | 6   | 0     | 0     | 1546    | 43  |
| 44  | 0 | 0 | 0    | 107  | 1439 | 0   | 0    | 0   | 0    | 0   | 0   | 0   | 0     | 0     | 1546    | 44  |
| 45  | 0 | 0 | 0    | 1254 | 167  | 30  | 75   | 0   | 0    | 0   | 0   | 20  | 0     | 0     | 1546    | 45  |
| 46  | 0 | 0 | 0    | 829  | 205  | 25  | 101  | 380 | 0    | 0   | 0   | 6   | 0     | 0     | 1546    | 46  |
| 47  | 0 | 0 | 0    | 229  | 426  | 234 | 245  | 270 | 136  | 0   | 0   | 6   | 0     | 0     | 1546    | 47  |
| 48  | 0 | 0 | 1546 | 0    | 0    | 0   | 0    | 0   | 0    | 0   | 0   | 0   | 0     | 0     | 1546    | 48  |
| 49  | 0 | 0 | 0    | 914  | 365  | 32  | 29   | 10  | 5    | 46  | 102 | 43  | 0     | 0     | 1546    | 49  |
| 50  | 0 | 0 | 0    | 557  | 788  | 0   | 0    | 0   | 0    | 0   | 0   | 62  | 139   | 0     | 1407    | 50  |
| 51  | 0 | 0 | 0    | 80   | 160  | 224 | 199  | 163 | 254  | 118 | 134 | 214 | 0     | 0     | 1546    | 51  |
| 52  | 0 | 0 | 0    | 1230 | 307  | 0   | 0    | 0   | 0    | 0   | 0   | 9   | 0     | 0     | 1546    | 52  |
| 53  | 0 | 0 | 0    | 1182 | 41   | 0   | 0    | 0   | 0    | 0   | 0   | 7   | 316   | 0     | 1230    | 53  |
| 54  | 0 | 0 | 0    | 422  | 518  | 473 | 101  | 5   | 0    | 0   | 0   | 27  | 0     | 0     | 1546    | 54  |
| 55  | 0 | 0 | 0    | 161  | 219  | 0   | 0    | 0   | 0    | 0   | 0   | 226 | 940   | 0     | 606     | 55  |
| 56  | 0 | 0 | 0    | 34   | 14   | 5   | 2    | 2   | 27   | 0   | 0   | 5   | 1457  | 0     | 89      | 56  |
| 57  | 0 | 0 | 0    | 896  | 192  | 453 | 0    | 0   | 0    | 0   | 0   | 5   | 0     | 0     | 1546    | 57  |
| 58  | 0 | 0 | 0    | 971  | 457  | 98  | 0    | 0   | 0    | 0   | 0   | 20  | 0     | 0     | 1546    | 58  |
| 59  | 0 | 0 | 0    | 829  | 717  | 0   | 0    | 0   | 0    | 0   | 0   | 0   | 0     | 0     | 1546    | 59  |
| 60  | 0 | 0 | 0    | 168  | 71   | 28  | 1269 | 0   | 0    | 0   | 0   | 10  | 0     | 0     | 1546    | 60  |
| 61  | 0 | 0 | 0    | 303  | 396  | 564 | 272  | 0   | 0    | 0   | 0   | 11  | 0     | 0     | 1546    | 61  |
| 62  | 0 | 0 | 0    | 1530 | 8    | 8   | 0    | 0   | 0    | 0   | 0   | 0   | 0     | 0     | 1546    | 62  |
| 63  | 0 | 0 | 0    | 0    | 0    | 0   | 0    | 0   | 0    | 0   | 0   | 0   | 1546  | 0     | 0       | 63  |
| 64  | 0 | 0 | 0    | 0    | 0    | 0   | 0    | 0   | 0    | 0   | 0   | 0   | 1546  | 0     | 0       | 64  |
| 65  | 0 | 0 | 0    | 0    | 0    | 0   | 0    | 0   | 0    | 0   | 0   | 0   | 1546  | 0     | 0       | 65  |
| 66  | 0 | 0 | 0    | 0    | 0    | 0   | 0    | 0   | 0    | 0   | 0   | 0   | 1546  | 0     | 0       | 66  |
| 67  | 0 | 0 | 0    | 0    | 0    | 0   | 0    | 0   | 0    | 0   | 0   | 0   | 1546  | 0     | 0       | 67  |
| 68  | 0 | 0 | 0    | 0    | 0    | 0   | 0    | 0   | 0    | 0   | 0   | 0   | 1546  | 0     | 0       | 68  |
| 69  | 0 | 0 | 0    | 0    | 0    | 0   | 0    | 0   | 0    | 0   | 0   | 0   | 1546  | 0     | 0       | 69  |
| 70  | 0 | 0 | 0    | 0    | 0    | 0   | 0    | 0   | 0    | 0   | 0   | 0   | 1546  | 0     | 0       | 70  |
| 71  | 0 | 0 | 0    | 0    | 0    | 0   | 0    | 0   | 0    | 0   | 0   | 0   | 1546  | 0     | 0       | 71  |
| 72  | 0 | 0 | 0    | 0    | 0    | 0   | 0    | 0   | 0    | 0   | 0   | 0   | 1546  | 0     | 0       | 72  |
| 73  | 0 | 0 | 0    | 0    | 0    | 0   | 0    | 0   | 0    | 0   | 0   | 0   | 1546  | 0     | 0       | 73  |
| 74  | 0 | 0 | 0    | 0    | 0    | 0   | 0    | 0   | 0    | 0   | 0   | 0   | 1546  | 0     | 0       | 74  |
| 75  | 0 | 0 | 0    | 0    | 0    | 0   | 0    | 0   | 0    | 0   | 0   | 0   | 1546  | 0     | 0       | 75  |
| 76  | 0 | 0 | 0    | 0    | 0    | 0   | 0    | 0   | 0    | 0   | 0   | 0   | 1546  | 0     | 0       | 76  |
| 77  | 0 | 0 | 0    | 0    | 0    | 0   | 0    | 0   | 0    | 0   | 0   | 0   | 1546  | 0     | 0       | 77  |
| 78  | 0 | 0 | 0    | 0    | 0    | 0   | 0    | 0   | 0    | 0   | 0   | 0   | 1546  | 0     | 0       | 78  |
| 79  | 0 | 0 | 0    | 0    | 0    | 0   | 0    | 0   | 0    | 0   | 0   | 0   | 1546  | 0     | 0       | 79  |
| 80  | 0 | 0 | 0    | 0    | 0    | 0   | 0    | 0   | 1546 | 0   | 0   | 0   | 0     | 0     | 1546    | 80  |

Column Frequencies for USPEW1999-MILLENNIUM  
Source: The Roper Center, 05/07/2009

TYPE=MULTASC

FORM 1 CARD 7 (COL=80 )  
Records = 1546

| COL | & | - | 0    | 1   | 2   | 3   | 4   | 5   | 6   | 7    | 8   | 9   | BLANK | OTHER | NONBLNK | COL |
|-----|---|---|------|-----|-----|-----|-----|-----|-----|------|-----|-----|-------|-------|---------|-----|
| 1   | 0 | 0 | 1546 | 0   | 0   | 0   | 0   | 0   | 0   | 0    | 0   | 0   | 0     | 0     | 1546    | 1   |
| 2   | 0 | 0 | 914  | 437 | 195 | 0   | 0   | 0   | 0   | 0    | 0   | 0   | 0     | 0     | 1546    | 2   |
| 3   | 0 | 0 | 230  | 194 | 146 | 210 | 161 | 152 | 153 | 131  | 80  | 89  | 0     | 0     | 1546    | 3   |
| 4   | 0 | 0 | 149  | 187 | 198 | 140 | 169 | 164 | 150 | 125  | 132 | 132 | 0     | 0     | 1546    | 4   |
| 5   | 0 | 0 | 152  | 149 | 164 | 156 | 148 | 147 | 169 | 134  | 159 | 168 | 0     | 0     | 1546    | 5   |
| 6   | 0 | 0 | 148  | 168 | 134 | 182 | 147 | 165 | 148 | 156  | 134 | 164 | 0     | 0     | 1546    | 6   |
| 7   | 0 | 0 | 0    | 256 | 178 | 253 | 297 | 223 | 188 | 151  | 0   | 0   | 0     | 0     | 1546    | 7   |
| 8   | 0 | 0 | 0    | 0   | 0   | 0   | 0   | 0   | 0   | 0    | 0   | 0   | 1546  | 0     | 0       | 8   |
| 9   | 0 | 0 | 0    | 0   | 0   | 0   | 0   | 0   | 0   | 0    | 0   | 0   | 1546  | 0     | 0       | 9   |
| 10  | 0 | 0 | 0    | 0   | 0   | 0   | 0   | 0   | 0   | 0    | 0   | 0   | 1546  | 0     | 0       | 10  |
| 11  | 0 | 0 | 0    | 0   | 0   | 0   | 0   | 0   | 0   | 0    | 0   | 0   | 1546  | 0     | 0       | 11  |
| 12  | 0 | 0 | 0    | 0   | 0   | 0   | 0   | 0   | 0   | 0    | 0   | 0   | 1546  | 0     | 0       | 12  |
| 13  | 0 | 0 | 0    | 0   | 0   | 0   | 0   | 0   | 0   | 0    | 0   | 0   | 1546  | 0     | 0       | 13  |
| 14  | 0 | 0 | 0    | 0   | 0   | 0   | 0   | 0   | 0   | 0    | 0   | 0   | 1546  | 0     | 0       | 14  |
| 15  | 0 | 0 | 0    | 0   | 0   | 0   | 0   | 0   | 0   | 0    | 0   | 0   | 1546  | 0     | 0       | 15  |
| 16  | 0 | 0 | 0    | 0   | 0   | 0   | 0   | 0   | 0   | 0    | 0   | 0   | 1546  | 0     | 0       | 16  |
| 17  | 0 | 0 | 0    | 0   | 0   | 0   | 0   | 0   | 0   | 0    | 0   | 0   | 1546  | 0     | 0       | 17  |
| 18  | 0 | 0 | 0    | 0   | 0   | 0   | 0   | 0   | 0   | 0    | 0   | 0   | 1546  | 0     | 0       | 18  |
| 19  | 0 | 0 | 0    | 0   | 0   | 0   | 0   | 0   | 0   | 0    | 0   | 0   | 1546  | 0     | 0       | 19  |
| 20  | 0 | 0 | 0    | 0   | 0   | 0   | 0   | 0   | 0   | 0    | 0   | 0   | 1546  | 0     | 0       | 20  |
| 21  | 0 | 0 | 0    | 0   | 0   | 0   | 0   | 0   | 0   | 0    | 0   | 0   | 1546  | 0     | 0       | 21  |
| 22  | 0 | 0 | 0    | 0   | 0   | 0   | 0   | 0   | 0   | 0    | 0   | 0   | 1546  | 0     | 0       | 22  |
| 23  | 0 | 0 | 0    | 0   | 0   | 0   | 0   | 0   | 0   | 0    | 0   | 0   | 1546  | 0     | 0       | 23  |
| 24  | 0 | 0 | 0    | 0   | 0   | 0   | 0   | 0   | 0   | 0    | 0   | 0   | 1546  | 0     | 0       | 24  |
| 25  | 0 | 0 | 0    | 0   | 0   | 0   | 0   | 0   | 0   | 0    | 0   | 0   | 1546  | 0     | 0       | 25  |
| 26  | 0 | 0 | 0    | 0   | 0   | 0   | 0   | 0   | 0   | 0    | 0   | 0   | 1546  | 0     | 0       | 26  |
| 27  | 0 | 0 | 0    | 0   | 0   | 0   | 0   | 0   | 0   | 0    | 0   | 0   | 1546  | 0     | 0       | 27  |
| 28  | 0 | 0 | 0    | 0   | 0   | 0   | 0   | 0   | 0   | 0    | 0   | 0   | 1546  | 0     | 0       | 28  |
| 29  | 0 | 0 | 0    | 0   | 0   | 0   | 0   | 0   | 0   | 0    | 0   | 0   | 1546  | 0     | 0       | 29  |
| 30  | 0 | 0 | 0    | 0   | 0   | 0   | 0   | 0   | 0   | 0    | 0   | 0   | 1546  | 0     | 0       | 30  |
| 31  | 0 | 0 | 0    | 0   | 0   | 0   | 0   | 0   | 0   | 0    | 0   | 0   | 1546  | 0     | 0       | 31  |
| 32  | 0 | 0 | 0    | 0   | 0   | 0   | 0   | 0   | 0   | 0    | 0   | 0   | 1546  | 0     | 0       | 32  |
| 33  | 0 | 0 | 0    | 0   | 0   | 0   | 0   | 0   | 0   | 0    | 0   | 0   | 1546  | 0     | 0       | 33  |
| 34  | 0 | 0 | 0    | 0   | 0   | 0   | 0   | 0   | 0   | 0    | 0   | 0   | 1546  | 0     | 0       | 34  |
| 35  | 0 | 0 | 0    | 0   | 0   | 0   | 0   | 0   | 0   | 0    | 0   | 0   | 1546  | 0     | 0       | 35  |
| 36  | 0 | 0 | 0    | 0   | 0   | 0   | 0   | 0   | 0   | 0    | 0   | 0   | 1546  | 0     | 0       | 36  |
| 37  | 0 | 0 | 0    | 0   | 0   | 0   | 0   | 0   | 0   | 0    | 0   | 0   | 1546  | 0     | 0       | 37  |
| 38  | 0 | 0 | 0    | 0   | 0   | 0   | 0   | 0   | 0   | 0    | 0   | 0   | 1546  | 0     | 0       | 38  |
| 39  | 0 | 0 | 0    | 0   | 0   | 0   | 0   | 0   | 0   | 0    | 0   | 0   | 1546  | 0     | 0       | 39  |
| 40  | 0 | 0 | 0    | 0   | 0   | 0   | 0   | 0   | 0   | 0    | 0   | 0   | 1546  | 0     | 0       | 40  |
| 41  | 0 | 0 | 0    | 0   | 0   | 0   | 0   | 0   | 0   | 0    | 0   | 0   | 1546  | 0     | 0       | 41  |
| 42  | 0 | 0 | 0    | 0   | 0   | 0   | 0   | 0   | 0   | 0    | 0   | 0   | 1546  | 0     | 0       | 42  |
| 43  | 0 | 0 | 0    | 0   | 0   | 0   | 0   | 0   | 0   | 0    | 0   | 0   | 1546  | 0     | 0       | 43  |
| 44  | 0 | 0 | 0    | 0   | 0   | 0   | 0   | 0   | 0   | 0    | 0   | 0   | 1546  | 0     | 0       | 44  |
| 45  | 0 | 0 | 0    | 0   | 0   | 0   | 0   | 0   | 0   | 0    | 0   | 0   | 1546  | 0     | 0       | 45  |
| 46  | 0 | 0 | 0    | 0   | 0   | 0   | 0   | 0   | 0   | 0    | 0   | 0   | 1546  | 0     | 0       | 46  |
| 47  | 0 | 0 | 0    | 0   | 0   | 0   | 0   | 0   | 0   | 0    | 0   | 0   | 1546  | 0     | 0       | 47  |
| 48  | 0 | 0 | 0    | 0   | 0   | 0   | 0   | 0   | 0   | 0    | 0   | 0   | 1546  | 0     | 0       | 48  |
| 49  | 0 | 0 | 0    | 0   | 0   | 0   | 0   | 0   | 0   | 0    | 0   | 0   | 1546  | 0     | 0       | 49  |
| 50  | 0 | 0 | 0    | 0   | 0   | 0   | 0   | 0   | 0   | 0    | 0   | 0   | 1546  | 0     | 0       | 50  |
| 51  | 0 | 0 | 0    | 0   | 0   | 0   | 0   | 0   | 0   | 0    | 0   | 0   | 1546  | 0     | 0       | 51  |
| 52  | 0 | 0 | 0    | 0   | 0   | 0   | 0   | 0   | 0   | 0    | 0   | 0   | 1546  | 0     | 0       | 52  |
| 53  | 0 | 0 | 0    | 0   | 0   | 0   | 0   | 0   | 0   | 0    | 0   | 0   | 1546  | 0     | 0       | 53  |
| 54  | 0 | 0 | 0    | 0   | 0   | 0   | 0   | 0   | 0   | 0    | 0   | 0   | 1546  | 0     | 0       | 54  |
| 55  | 0 | 0 | 0    | 0   | 0   | 0   | 0   | 0   | 0   | 0    | 0   | 0   | 1546  | 0     | 0       | 55  |
| 56  | 0 | 0 | 0    | 0   | 0   | 0   | 0   | 0   | 0   | 0    | 0   | 0   | 1546  | 0     | 0       | 56  |
| 57  | 0 | 0 | 0    | 0   | 0   | 0   | 0   | 0   | 0   | 0    | 0   | 0   | 1546  | 0     | 0       | 57  |
| 58  | 0 | 0 | 0    | 0   | 0   | 0   | 0   | 0   | 0   | 0    | 0   | 0   | 1546  | 0     | 0       | 58  |
| 59  | 0 | 0 | 0    | 0   | 0   | 0   | 0   | 0   | 0   | 0    | 0   | 0   | 1546  | 0     | 0       | 59  |
| 60  | 0 | 0 | 0    | 0   | 0   | 0   | 0   | 0   | 0   | 0    | 0   | 0   | 1546  | 0     | 0       | 60  |
| 61  | 0 | 0 | 0    | 0   | 0   | 0   | 0   | 0   | 0   | 0    | 0   | 0   | 1546  | 0     | 0       | 61  |
| 62  | 0 | 0 | 0    | 0   | 0   | 0   | 0   | 0   | 0   | 0    | 0   | 0   | 1546  | 0     | 0       | 62  |
| 63  | 0 | 0 | 0    | 0   | 0   | 0   | 0   | 0   | 0   | 0    | 0   | 0   | 1546  | 0     | 0       | 63  |
| 64  | 0 | 0 | 0    | 0   | 0   | 0   | 0   | 0   | 0   | 0    | 0   | 0   | 1546  | 0     | 0       | 64  |
| 65  | 0 | 0 | 0    | 0   | 0   | 0   | 0   | 0   | 0   | 0    | 0   | 0   | 1546  | 0     | 0       | 65  |
| 66  | 0 | 0 | 0    | 0   | 0   | 0   | 0   | 0   | 0   | 0    | 0   | 0   | 1546  | 0     | 0       | 66  |
| 67  | 0 | 0 | 0    | 0   | 0   | 0   | 0   | 0   | 0   | 0    | 0   | 0   | 1546  | 0     | 0       | 67  |
| 68  | 0 | 0 | 0    | 0   | 0   | 0   | 0   | 0   | 0   | 0    | 0   | 0   | 1546  | 0     | 0       | 68  |
| 69  | 0 | 0 | 0    | 0   | 0   | 0   | 0   | 0   | 0   | 0    | 0   | 0   | 1546  | 0     | 0       | 69  |
| 70  | 0 | 0 | 0    | 0   | 0   | 0   | 0   | 0   | 0   | 0    | 0   | 0   | 1546  | 0     | 0       | 70  |
| 71  | 0 | 0 | 0    | 0   | 0   | 0   | 0   | 0   | 0   | 0    | 0   | 0   | 1546  | 0     | 0       | 71  |
| 72  | 0 | 0 | 0    | 0   | 0   | 0   | 0   | 0   | 0   | 0    | 0   | 0   | 1546  | 0     | 0       | 72  |
| 73  | 0 | 0 | 0    | 0   | 0   | 0   | 0   | 0   | 0   | 0    | 0   | 0   | 1546  | 0     | 0       | 73  |
| 74  | 0 | 0 | 0    | 0   | 0   | 0   | 0   | 0   | 0   | 0    | 0   | 0   | 1546  | 0     | 0       | 74  |
| 75  | 0 | 0 | 0    | 0   | 0   | 0   | 0   | 0   | 0   | 0    | 0   | 0   | 1546  | 0     | 0       | 75  |
| 76  | 0 | 0 | 0    | 0   | 0   | 0   | 0   | 0   | 0   | 0    | 0   | 0   | 1546  | 0     | 0       | 76  |
| 77  | 0 | 0 | 0    | 0   | 0   | 0   | 0   | 0   | 0   | 0    | 0   | 0   | 1546  | 0     | 0       | 77  |
| 78  | 0 | 0 | 0    | 0   | 0   | 0   | 0   | 0   | 0   | 0    | 0   | 0   | 1546  | 0     | 0       | 78  |
| 79  | 0 | 0 | 0    | 0   | 0   | 0   | 0   | 0   | 0   | 0    | 0   | 0   | 1546  | 0     | 0       | 79  |
| 80  | 0 | 0 | 0    | 0   | 0   | 0   | 0   | 0   | 0   | 1546 | 0   | 0   | 0     | 0     | 1546    | 80  |

Column Frequencies for USPEW1999-MILLENNIUM  
Source: The Roper Center, 05/07/2009

TYPE=MULTASC

FORM 1 CARD 8 (COL=80 )  
Records = 1546

| COL | & | - | 0    | 1   | 2   | 3   | 4   | 5   | 6   | 7   | 8    | 9   | BLANK | OTHER | NONBLNK | COL |
|-----|---|---|------|-----|-----|-----|-----|-----|-----|-----|------|-----|-------|-------|---------|-----|
| 1   | 0 | 0 | 1546 | 0   | 0   | 0   | 0   | 0   | 0   | 0   | 0    | 0   | 0     | 0     | 1546    | 1   |
| 2   | 0 | 0 | 914  | 437 | 195 | 0   | 0   | 0   | 0   | 0   | 0    | 0   | 0     | 0     | 1546    | 2   |
| 3   | 0 | 0 | 230  | 194 | 146 | 210 | 161 | 152 | 153 | 131 | 80   | 89  | 0     | 0     | 1546    | 3   |
| 4   | 0 | 0 | 149  | 187 | 198 | 140 | 169 | 164 | 150 | 125 | 132  | 132 | 0     | 0     | 1546    | 4   |
| 5   | 0 | 0 | 152  | 149 | 164 | 156 | 148 | 147 | 169 | 134 | 159  | 168 | 0     | 0     | 1546    | 5   |
| 6   | 0 | 0 | 148  | 168 | 134 | 182 | 147 | 165 | 148 | 156 | 134  | 164 | 0     | 0     | 1546    | 6   |
| 7   | 0 | 0 | 0    | 0   | 0   | 0   | 0   | 0   | 0   | 0   | 0    | 0   | 1546  | 0     | 0       | 7   |
| 8   | 0 | 0 | 0    | 0   | 0   | 0   | 0   | 0   | 0   | 0   | 0    | 0   | 1546  | 0     | 0       | 8   |
| 9   | 0 | 0 | 0    | 0   | 0   | 0   | 0   | 0   | 0   | 0   | 0    | 0   | 1546  | 0     | 0       | 9   |
| 10  | 0 | 0 | 0    | 0   | 0   | 0   | 0   | 0   | 0   | 0   | 0    | 0   | 1546  | 0     | 0       | 10  |
| 11  | 0 | 0 | 0    | 0   | 0   | 0   | 0   | 0   | 0   | 0   | 0    | 0   | 1546  | 0     | 0       | 11  |
| 12  | 0 | 0 | 0    | 0   | 0   | 0   | 0   | 0   | 0   | 0   | 0    | 0   | 1546  | 0     | 0       | 12  |
| 13  | 0 | 0 | 0    | 0   | 0   | 0   | 0   | 0   | 0   | 0   | 0    | 0   | 1546  | 0     | 0       | 13  |
| 14  | 0 | 0 | 0    | 0   | 0   | 0   | 0   | 0   | 0   | 0   | 0    | 0   | 1546  | 0     | 0       | 14  |
| 15  | 0 | 0 | 0    | 0   | 0   | 0   | 0   | 0   | 0   | 0   | 0    | 0   | 1546  | 0     | 0       | 15  |
| 16  | 0 | 0 | 0    | 0   | 0   | 0   | 0   | 0   | 0   | 0   | 0    | 0   | 1546  | 0     | 0       | 16  |
| 17  | 0 | 0 | 0    | 0   | 0   | 0   | 0   | 0   | 0   | 0   | 0    | 0   | 1546  | 0     | 0       | 17  |
| 18  | 0 | 0 | 0    | 0   | 0   | 0   | 0   | 0   | 0   | 0   | 0    | 0   | 1546  | 0     | 0       | 18  |
| 19  | 0 | 0 | 0    | 0   | 0   | 0   | 0   | 0   | 0   | 0   | 0    | 0   | 1546  | 0     | 0       | 19  |
| 20  | 0 | 0 | 0    | 0   | 0   | 0   | 0   | 0   | 0   | 0   | 0    | 0   | 1546  | 0     | 0       | 20  |
| 21  | 0 | 0 | 0    | 0   | 0   | 0   | 0   | 0   | 0   | 0   | 0    | 0   | 1546  | 0     | 0       | 21  |
| 22  | 0 | 0 | 0    | 0   | 0   | 0   | 0   | 0   | 0   | 0   | 0    | 0   | 1546  | 0     | 0       | 22  |
| 23  | 0 | 0 | 0    | 0   | 0   | 0   | 0   | 0   | 0   | 0   | 0    | 0   | 1546  | 0     | 0       | 23  |
| 24  | 0 | 0 | 0    | 0   | 0   | 0   | 0   | 0   | 0   | 0   | 0    | 0   | 1546  | 0     | 0       | 24  |
| 25  | 0 | 0 | 0    | 0   | 0   | 0   | 0   | 0   | 0   | 0   | 0    | 0   | 1546  | 0     | 0       | 25  |
| 26  | 0 | 0 | 0    | 0   | 0   | 0   | 0   | 0   | 0   | 0   | 0    | 0   | 1546  | 0     | 0       | 26  |
| 27  | 0 | 0 | 0    | 0   | 0   | 0   | 0   | 0   | 0   | 0   | 0    | 0   | 1546  | 0     | 0       | 27  |
| 28  | 0 | 0 | 0    | 0   | 0   | 0   | 0   | 0   | 0   | 0   | 0    | 0   | 1546  | 0     | 0       | 28  |
| 29  | 0 | 0 | 0    | 0   | 0   | 0   | 0   | 0   | 0   | 0   | 0    | 0   | 1546  | 0     | 0       | 29  |
| 30  | 0 | 0 | 0    | 0   | 0   | 0   | 0   | 0   | 0   | 0   | 0    | 0   | 1546  | 0     | 0       | 30  |
| 31  | 0 | 0 | 0    | 0   | 0   | 0   | 0   | 0   | 0   | 0   | 0    | 0   | 1546  | 0     | 0       | 31  |
| 32  | 0 | 0 | 0    | 0   | 0   | 0   | 0   | 0   | 0   | 0   | 0    | 0   | 1546  | 0     | 0       | 32  |
| 33  | 0 | 0 | 0    | 0   | 0   | 0   | 0   | 0   | 0   | 0   | 0    | 0   | 1546  | 0     | 0       | 33  |
| 34  | 0 | 0 | 0    | 0   | 0   | 0   | 0   | 0   | 0   | 0   | 0    | 0   | 1546  | 0     | 0       | 34  |
| 35  | 0 | 0 | 0    | 0   | 0   | 0   | 0   | 0   | 0   | 0   | 0    | 0   | 1546  | 0     | 0       | 35  |
| 36  | 0 | 0 | 0    | 0   | 0   | 0   | 0   | 0   | 0   | 0   | 0    | 0   | 1546  | 0     | 0       | 36  |
| 37  | 0 | 0 | 0    | 0   | 0   | 0   | 0   | 0   | 0   | 0   | 0    | 0   | 1546  | 0     | 0       | 37  |
| 38  | 0 | 0 | 0    | 0   | 0   | 0   | 0   | 0   | 0   | 0   | 0    | 0   | 1546  | 0     | 0       | 38  |
| 39  | 0 | 0 | 0    | 0   | 0   | 0   | 0   | 0   | 0   | 0   | 0    | 0   | 1546  | 0     | 0       | 39  |
| 40  | 0 | 0 | 0    | 0   | 0   | 0   | 0   | 0   | 0   | 0   | 0    | 0   | 1546  | 0     | 0       | 40  |
| 41  | 0 | 0 | 0    | 0   | 0   | 0   | 0   | 0   | 0   | 0   | 0    | 0   | 1546  | 0     | 0       | 41  |
| 42  | 0 | 0 | 0    | 0   | 0   | 0   | 0   | 0   | 0   | 0   | 0    | 0   | 1546  | 0     | 0       | 42  |
| 43  | 0 | 0 | 0    | 0   | 0   | 0   | 0   | 0   | 0   | 0   | 0    | 0   | 1546  | 0     | 0       | 43  |
| 44  | 0 | 0 | 0    | 0   | 0   | 0   | 0   | 0   | 0   | 0   | 0    | 0   | 1546  | 0     | 0       | 44  |
| 45  | 0 | 0 | 0    | 0   | 0   | 0   | 0   | 0   | 0   | 0   | 0    | 0   | 1546  | 0     | 0       | 45  |
| 46  | 0 | 0 | 0    | 0   | 0   | 0   | 0   | 0   | 0   | 0   | 0    | 0   | 1546  | 0     | 0       | 46  |
| 47  | 0 | 0 | 0    | 0   | 0   | 0   | 0   | 0   | 0   | 0   | 0    | 0   | 1546  | 0     | 0       | 47  |
| 48  | 0 | 0 | 0    | 0   | 0   | 0   | 0   | 0   | 0   | 0   | 0    | 0   | 1546  | 0     | 0       | 48  |
| 49  | 0 | 0 | 0    | 0   | 0   | 0   | 0   | 0   | 0   | 0   | 0    | 0   | 1546  | 0     | 0       | 49  |
| 50  | 0 | 0 | 0    | 0   | 0   | 0   | 0   | 0   | 0   | 0   | 0    | 0   | 1546  | 0     | 0       | 50  |
| 51  | 0 | 0 | 0    | 0   | 0   | 0   | 0   | 0   | 0   | 0   | 0    | 0   | 1546  | 0     | 0       | 51  |
| 52  | 0 | 0 | 0    | 0   | 0   | 0   | 0   | 0   | 0   | 0   | 0    | 0   | 1546  | 0     | 0       | 52  |
| 53  | 0 | 0 | 0    | 0   | 0   | 0   | 0   | 0   | 0   | 0   | 0    | 0   | 1546  | 0     | 0       | 53  |
| 54  | 0 | 0 | 0    | 0   | 0   | 0   | 0   | 0   | 0   | 0   | 0    | 0   | 1546  | 0     | 0       | 54  |
| 55  | 0 | 0 | 0    | 0   | 0   | 0   | 0   | 0   | 0   | 0   | 0    | 0   | 1546  | 0     | 0       | 55  |
| 56  | 0 | 0 | 0    | 0   | 0   | 0   | 0   | 0   | 0   | 0   | 0    | 0   | 1546  | 0     | 0       | 56  |
| 57  | 0 | 0 | 0    | 0   | 0   | 0   | 0   | 0   | 0   | 0   | 0    | 0   | 1546  | 0     | 0       | 57  |
| 58  | 0 | 0 | 0    | 0   | 0   | 0   | 0   | 0   | 0   | 0   | 0    | 0   | 1546  | 0     | 0       | 58  |
| 59  | 0 | 0 | 0    | 0   | 0   | 0   | 0   | 0   | 0   | 0   | 0    | 0   | 1546  | 0     | 0       | 59  |
| 60  | 0 | 0 | 0    | 0   | 0   | 0   | 0   | 0   | 0   | 0   | 0    | 0   | 1546  | 0     | 0       | 60  |
| 61  | 0 | 0 | 1545 | 1   | 0   | 0   | 0   | 0   | 0   | 0   | 0    | 0   | 0     | 0     | 1546    | 61  |
| 62  | 0 | 0 | 119  | 838 | 449 | 90  | 39  | 10  | 1   | 0   | 0    | 0   | 0     | 0     | 1546    | 62  |
| 63  | 0 | 0 | 0    | 0   | 0   | 0   | 0   | 0   | 0   | 0   | 0    | 0   | 0     | 1546  | 1546    | 63  |
| 64  | 0 | 0 | 164  | 195 | 120 | 101 | 155 | 170 | 139 | 178 | 174  | 150 | 0     | 0     | 1546    | 64  |
| 65  | 0 | 0 | 170  | 160 | 154 | 127 | 147 | 159 | 186 | 151 | 118  | 174 | 0     | 0     | 1546    | 65  |
| 66  | 0 | 0 | 1545 | 1   | 0   | 0   | 0   | 0   | 0   | 0   | 0    | 0   | 0     | 0     | 1546    | 66  |
| 67  | 0 | 0 | 119  | 838 | 449 | 90  | 39  | 10  | 1   | 0   | 0    | 0   | 0     | 0     | 1546    | 67  |
| 68  | 0 | 0 | 164  | 195 | 120 | 101 | 155 | 170 | 139 | 178 | 174  | 150 | 0     | 0     | 1546    | 68  |
| 69  | 0 | 0 | 170  | 160 | 154 | 127 | 147 | 159 | 186 | 151 | 118  | 174 | 0     | 0     | 1546    | 69  |
| 70  | 0 | 0 | 0    | 0   | 0   | 0   | 0   | 0   | 0   | 0   | 0    | 0   | 1546  | 0     | 0       | 70  |
| 71  | 0 | 0 | 1546 | 0   | 0   | 0   | 0   | 0   | 0   | 0   | 0    | 0   | 0     | 0     | 1546    | 71  |
| 72  | 0 | 0 | 0    | 516 | 753 | 166 | 79  | 32  | 0   | 0   | 0    | 0   | 0     | 0     | 1546    | 72  |
| 73  | 0 | 0 | 216  | 177 | 175 | 143 | 176 | 91  | 124 | 142 | 110  | 192 | 0     | 0     | 1546    | 73  |
| 74  | 0 | 0 | 264  | 184 | 60  | 161 | 123 | 179 | 144 | 75  | 193  | 163 | 0     | 0     | 1546    | 74  |
| 75  | 0 | 0 | 0    | 0   | 0   | 0   | 0   | 0   | 0   | 0   | 0    | 0   | 1546  | 0     | 0       | 75  |
| 76  | 0 | 0 | 0    | 0   | 0   | 0   | 0   | 0   | 0   | 0   | 0    | 0   | 1546  | 0     | 0       | 76  |
| 77  | 0 | 0 | 0    | 0   | 0   | 0   | 0   | 0   | 0   | 0   | 0    | 0   | 1546  | 0     | 0       | 77  |
| 78  | 0 | 0 | 0    | 0   | 0   | 0   | 0   | 0   | 0   | 0   | 0    | 0   | 1546  | 0     | 0       | 78  |
| 79  | 0 | 0 | 0    | 0   | 0   | 0   | 0   | 0   | 0   | 0   | 0    | 0   | 1546  | 0     | 0       | 79  |
| 80  | 0 | 0 | 0    | 0   | 0   | 0   | 0   | 0   | 0   | 0   | 1546 | 0   | 0     | 0     | 1546    | 80  |
