# Supplementary material
Source: publisher figshare collection journal article supplement (https://sage.figshare.com/ndownloader/files/24995266)
Supplement: Supplementary file 2 [file 24995266]

|                                       |                                                                                                                                                    |
|---------------------------------------|----------------------------------------------------------------------------------------------------------------------------------------------------|
| <b>Country:</b>                       | United States                                                                                                                                      |
| <b>Title:</b>                         | War Survey                                                                                                                                         |
| <b>Survey Organization:</b>           | Office of Public Opinion Research                                                                                                                  |
| <b>Sponsor:</b>                       |                                                                                                                                                    |
| <b>Field Dates:</b>                   | January 28, 1941                                                                                                                                   |
| <b>Sample:</b>                        | National Adult                                                                                                                                     |
| <b>Sample Size:</b>                   | 3,168                                                                                                                                              |
| <b>Sample Notes:</b>                  | This dataset has two forms: Form K & T.                                                                                                            |
| <b>Interview method:</b>              | Personal                                                                                                                                           |
| <b>Weight Location:</b>               | None                                                                                                                                               |
| <b>No. of records per respondent:</b> | 1                                                                                                                                                  |
| <b>Usage Notes:</b>                   | USE THE VARIABLE COLUMN LOCATIONS, GENERATED BY SPSS, FOR THE FLAT ASCII TEXT DATA FILE. DO NOT USE THE VARIABLE COLUMN LOCATIONS IN THE CODEBOOK. |

**Please note that data purchased from The Roper Center for Public Opinion Research may not be redisseminated without written permission. The results of any analyses conducted on the data may, however, be published with appropriate acknowledgments and source citation.**

---

write will generate the following

| Variable | Rec | Start | End | Format |
|----------|-----|-------|-----|--------|
| BALLOT   | 1   | 1     | 3   | A3     |
| QUES_ID  | 1   | 4     | 7   | A4     |
| FORM     | 1   | 8     | 8   | A1     |
| SECTION  | 1   | 9     | 9   | A1     |
| STATE    | 1   | 10    | 11  | A2     |
| Q01      | 1   | 12    | 12  | A1     |
| KQ02     | 1   | 13    | 13  | A1     |
| KQ02V    | 1   | 14    | 14  | A1     |
| TQ02A    | 1   | 15    | 15  | A1     |
| TQ02B    | 1   | 16    | 16  | A1     |
| Q03      | 1   | 17    | 17  | A1     |
| Q04A     | 1   | 18    | 18  | A1     |
| Q04B     | 1   | 19    | 20  | A2     |
| Q04C     | 1   | 21    | 22  | A2     |
| Q04D     | 1   | 23    | 24  | A2     |
| Q04E     | 1   | 25    | 26  | A2     |
| Q04F     | 1   | 27    | 27  | A1     |
| Q05A     | 1   | 28    | 28  | A1     |
| Q05B     | 1   | 29    | 29  | A1     |
| Q06      | 1   | 30    | 31  | A2     |
| Q07      | 1   | 32    | 32  | A1     |
| Q08A     | 1   | 33    | 33  | A1     |
| Q08B     | 1   | 34    | 35  | A2     |
| Q09A     | 1   | 36    | 36  | A1     |
| Q9B_C1   | 1   | 37    | 37  | A1     |
| Q9B_C2_1 | 1   | 38    | 38  | F1.0   |
| Q9B_C2_2 | 1   | 39    | 39  | F1.0   |
| Q9B_C2_3 | 1   | 40    | 40  | F1.0   |
| Q9B_C2_4 | 1   | 41    | 41  | F1.0   |
| Q9B_C2_5 | 1   | 42    | 42  | F1.0   |
| Q9B_C2_6 | 1   | 43    | 43  | F1.0   |
| Q9B_C2_7 | 1   | 44    | 44  | F1.0   |
| Q9B_C2_8 | 1   | 45    | 45  | F1.0   |
| Q9B_C2_9 | 1   | 46    | 46  | F1.0   |
| Q9BC2_10 | 1   | 47    | 47  | F1.0   |
| Q9BC2_11 | 1   | 48    | 48  | F1.0   |
| Q9BC2_12 | 1   | 49    | 49  | F1.0   |
| Q10A_C1  | 1   | 50    | 50  | A1     |
| Q10AC2_1 | 1   | 51    | 51  | F1.0   |
| Q10AC2_2 | 1   | 52    | 52  | F1.0   |
| Q10AC2_3 | 1   | 53    | 53  | F1.0   |
| Q10AC2_4 | 1   | 54    | 54  | F1.0   |
| Q10AC2_5 | 1   | 55    | 55  | F1.0   |
| Q10AC2_6 | 1   | 56    | 56  | F1.0   |
| Q10AC2_7 | 1   | 57    | 57  | F1.0   |
| Q10AC2_8 | 1   | 58    | 58  | F1.0   |
| Q10AC2_9 | 1   | 59    | 59  | F1.0   |
| Q10AC210 | 1   | 60    | 60  | F1.0   |
| Q10AC211 | 1   | 61    | 61  | F1.0   |
| Q10AC212 | 1   | 62    | 62  | A1     |
| Q10_B    | 1   | 63    | 63  | A1     |
| Q10_C    | 1   | 64    | 65  | A2     |
| Q10_D    | 1   | 66    | 67  | A2     |
| Q11_K    | 1   | 68    | 68  | A1     |
| Q11_T    | 1   | 69    | 69  | A1     |
| Q11_1K   | 1   | 70    | 71  | A2     |
| Q12_K    | 1   | 72    | 72  | A1     |
| Q12_1K   | 1   | 73    | 74  | A2     |
| Q12_2K   | 1   | 75    | 75  | A1     |

|          |   |     |     |                  |
|----------|---|-----|-----|------------------|
|          |   |     |     | opor806_cols.txt |
| Q12_T    | 1 | 76  | 76  | A1               |
| Q12_2_T  | 1 | 77  | 77  | A1               |
| Q13A_K   | 1 | 78  | 78  | A1               |
| Q13B_K   | 1 | 79  | 79  | A1               |
| Q13A_T   | 1 | 80  | 80  | A1               |
| Q13B_T   | 1 | 81  | 81  | A1               |
| Q14F     | 1 | 82  | 83  | A2               |
| Q14M     | 1 | 84  | 85  | A2               |
| Q15      | 1 | 86  | 87  | A2               |
| Q16      | 1 | 88  | 88  | A1               |
| Q17      | 1 | 89  | 90  | A2               |
| Q18AB    | 1 | 91  | 91  | A1               |
| Q18C     | 1 | 92  | 92  | A1               |
| SES      | 1 | 93  | 93  | A1               |
| CAR      | 1 | 94  | 94  | A1               |
| SEX      | 1 | 95  | 95  | A1               |
| RACE     | 1 | 96  | 96  | A1               |
| OCC1     | 1 | 97  | 97  | A1               |
| OCC2     | 1 | 98  | 98  | A1               |
| OCC3     | 1 | 99  | 99  | A1               |
| AGE      | 1 | 100 | 101 | A2               |
| PHONE    | 1 | 102 | 102 | A1               |
| DATE     | 1 | 103 | 104 | A2               |
| ACTION   | 1 | 105 | 108 | A4               |
| URBAN    | 1 | 109 | 109 | A1               |
| INTERVR  | 1 | 110 | 111 | A2               |
| INFOGRPS | 1 | 112 | 112 | A1               |

## 1SINGLE COL FREQUENCIES FOR USOPOR1940-806/ NCARDS 3168

| 0 COL | &    | -  | 0    | 1    | 2    | 3    | 4    | 5    | 6    | 7   | 8    | 9   | BLANK | OTHER | NONBLNK | COL |
|-------|------|----|------|------|------|------|------|------|------|-----|------|-----|-------|-------|---------|-----|
| +     |      |    |      |      |      |      |      |      |      |     |      |     |       |       |         |     |
| 1     | 0    | 0  | 0    | 0    | 0    | 1    | 0    | 0    | 0    | 1   | 3166 | 0   | 0     | 0     | 3168    | 1   |
| 2     | 0    | 0  | 3166 | 0    | 0    | 1    | 0    | 0    | 0    | 0   | 1    | 0   | 0     | 0     | 3168    | 2   |
| 3     | 0    | 0  | 0    | 0    | 0    | 0    | 0    | 1    | 3166 | 0   | 0    | 1   | 0     | 0     | 3168    | 3   |
| 4     | 0    | 0  | 766  | 832  | 809  | 692  | 66   | 0    | 0    | 0   | 0    | 0   | 0     | 3     | 3168    | 4   |
| 5     | 0    | 0  | 396  | 304  | 358  | 313  | 364  | 310  | 334  | 192 | 276  | 321 | 0     | 0     | 3168    | 5   |
| 6     | 0    | 0  | 349  | 323  | 308  | 301  | 314  | 315  | 333  | 316 | 316  | 290 | 2     | 1     | 3166    | 6   |
| 7     | 0    | 0  | 317  | 314  | 304  | 319  | 327  | 325  | 321  | 322 | 313  | 304 | 1     | 1     | 3167    | 7   |
| 8     | 0    | 0  | 0    | 1625 | 1543 | 0    | 0    | 0    | 0    | 0   | 0    | 0   | 0     | 0     | 3168    | 8   |
| 9     | 0    | 0  | 0    | 226  | 856  | 745  | 509  | 245  | 189  | 259 | 139  | 0   | 0     | 0     | 3168    | 9   |
| 10    | 0    | 0  | 0    | 226  | 856  | 745  | 509  | 245  | 189  | 259 | 139  | 0   | 0     | 0     | 3168    | 10  |
| 11    | 0    | 0  | 1    | 992  | 410  | 644  | 617  | 89   | 160  | 93  | 135  | 26  | 1     | 0     | 3167    | 11  |
| 12    | 0    | 0  | 6    | 1558 | 787  | 228  | 279  | 43   | 266  | 0   | 0    | 0   | 0     | 1     | 3168    | 12  |
| 13    | 0    | 0  | 5    | 153  | 1026 | 132  | 307  | 0    | 0    | 0   | 0    | 0   | 1544  | 1     | 1624    | 13  |
| 14    | 1623 | 0  | 0    | 0    | 2    | 0    | 0    | 0    | 0    | 0   | 0    | 0   | 1543  | 0     | 1625    | 14  |
| 15    | 0    | 0  | 11   | 455  | 500  | 347  | 230  | 0    | 0    | 0   | 0    | 0   | 1625  | 0     | 1543    | 15  |
| 16    | 0    | 0  | 63   | 124  | 997  | 99   | 260  | 0    | 0    | 0   | 0    | 0   | 1625  | 0     | 1543    | 16  |
| 17    | 0    | 0  | 11   | 2043 | 173  | 638  | 155  | 148  | 0    | 0   | 0    | 0   | 0     | 0     | 3168    | 17  |
| 18    | 1    | 0  | 10   | 2275 | 239  | 642  | 0    | 0    | 0    | 1   | 0    | 0   | 0     | 0     | 3168    | 18  |
| 19    | 396  | 0  | 0    | 1566 | 748  | 247  | 176  | 19   | 9    | 7   | 0    | 0   | 0     | 0     | 3168    | 19  |
| 20    | 397  | 0  | 2562 | 66   | 52   | 12   | 17   | 34   | 12   | 3   | 4    | 8   | 0     | 1     | 3168    | 20  |
| 21    | 353  | 0  | 4    | 1321 | 1160 | 164  | 120  | 29   | 15   | 0   | 0    | 0   | 1     | 1     | 3167    | 21  |
| 22    | 353  | 0  | 2714 | 16   | 11   | 14   | 7    | 9    | 7    | 3   | 23   | 3   | 8     | 0     | 3160    | 22  |
| 23    | 1634 | 0  | 3    | 805  | 486  | 156  | 44   | 32   | 5    | 0   | 0    | 0   | 3     | 0     | 3165    | 23  |
| 24    | 1640 | 0  | 1455 | 9    | 13   | 13   | 6    | 9    | 14   | 2   | 3    | 4   | 0     | 0     | 3168    | 24  |
| 25    | 1635 | 0  | 0    | 861  | 356  | 136  | 157  | 12   | 9    | 2   | 0    | 0   | 0     | 0     | 3168    | 25  |
| 26    | 1635 | 0  | 1358 | 77   | 30   | 14   | 7    | 25   | 3    | 7   | 7    | 5   | 0     | 0     | 3168    | 26  |
| 27    | 1622 | 0  | 18   | 556  | 808  | 61   | 103  | 0    | 0    | 0   | 0    | 0   | 0     | 0     | 3168    | 27  |
| 28    | 1    | 0  | 15   | 845  | 166  | 1905 | 234  | 0    | 0    | 0   | 0    | 0   | 1     | 1     | 3167    | 28  |
| 29    | 1    | 0  | 41   | 2108 | 668  | 346  | 2    | 0    | 0    | 0   | 0    | 0   | 1     | 1     | 3167    | 29  |
| 30    | 7    | 0  | 3    | 438  | 2499 | 155  | 59   | 7    | 0    | 0   | 0    | 0   | 0     | 0     | 3168    | 30  |
| 31    | 8    | 0  | 3098 | 10   | 17   | 15   | 1    | 4    | 3    | 2   | 7    | 3   | 0     | 0     | 3168    | 31  |
| 32    | 0    | 0  | 18   | 1123 | 1854 | 173  | 0    | 0    | 0    | 0   | 0    | 0   | 0     | 0     | 3168    | 32  |
| 33    | 0    | 0  | 20   | 2222 | 611  | 314  | 0    | 0    | 0    | 0   | 0    | 0   | 1     | 0     | 3167    | 33  |
| 34    | 3    | 0  | 677  | 235  | 285  | 228  | 216  | 542  | 255  | 209 | 320  | 198 | 0     | 0     | 3168    | 34  |
| 35    | 0    | 0  | 77   | 1461 | 1627 | 1    | 0    | 2    | 0    | 0   | 0    | 0   | 0     | 0     | 3168    | 35  |
| 36    | 1059 | 0  | 12   | 1732 | 90   | 34   | 6    | 235  | 0    | 0   | 0    | 0   | 0     | 0     | 3168    | 36  |
| 37    | 168  | 0  | 6    | 112  | 289  | 603  | 1955 | 6    | 2    | 1   | 0    | 0   | 26    | 0     | 3142    | 37  |
| 38    | 0    | 0  | 319  | 2849 | 0    | 0    | 0    | 0    | 0    | 0   | 0    | 0   | 0     | 0     | 3168    | 38  |
| 39    | 0    | 0  | 564  | 2604 | 0    | 0    | 0    | 0    | 0    | 0   | 0    | 0   | 0     | 0     | 3168    | 39  |
| 40    | 0    | 0  | 1768 | 1400 | 0    | 0    | 0    | 0    | 0    | 0   | 0    | 0   | 0     | 0     | 3168    | 40  |
| 41    | 0    | 0  | 1459 | 1709 | 0    | 0    | 0    | 0    | 0    | 0   | 0    | 0   | 0     | 0     | 3168    | 41  |
| 42    | 0    | 0  | 2958 | 210  | 0    | 0    | 0    | 0    | 0    | 0   | 0    | 0   | 0     | 0     | 3168    | 42  |
| 43    | 0    | 0  | 2349 | 819  | 0    | 0    | 0    | 0    | 0    | 0   | 0    | 0   | 0     | 0     | 3168    | 43  |
| 44    | 0    | 0  | 3159 | 9    | 0    | 0    | 0    | 0    | 0    | 0   | 0    | 0   | 0     | 0     | 3168    | 44  |
| 45    | 0    | 0  | 3142 | 26   | 0    | 0    | 0    | 0    | 0    | 0   | 0    | 0   | 0     | 0     | 3168    | 45  |
| 46    | 0    | 0  | 3155 | 13   | 0    | 0    | 0    | 0    | 0    | 0   | 0    | 0   | 0     | 0     | 3168    | 46  |
| 47    | 0    | 0  | 3155 | 13   | 0    | 0    | 0    | 0    | 0    | 0   | 0    | 0   | 0     | 0     | 3168    | 47  |
| 48    | 0    | 0  | 2836 | 332  | 0    | 0    | 0    | 0    | 0    | 0   | 0    | 0   | 0     | 0     | 3168    | 48  |
| 49    | 0    | 0  | 2522 | 646  | 0    | 0    | 0    | 0    | 0    | 0   | 0    | 0   | 0     | 0     | 3168    | 49  |
| 50    | 257  | 0  | 3    | 117  | 189  | 371  | 535  | 1523 | 134  | 33  | 5    | 1   | 0     | 0     | 3168    | 50  |
| 51    | 0    | 0  | 1127 | 2041 | 0    | 0    | 0    | 0    | 0    | 0   | 0    | 0   | 0     | 0     | 3168    | 51  |
| 52    | 0    | 0  | 2908 | 260  | 0    | 0    | 0    | 0    | 0    | 0   | 0    | 0   | 0     | 0     | 3168    | 52  |
| 53    | 0    | 0  | 2200 | 968  | 0    | 0    | 0    | 0    | 0    | 0   | 0    | 0   | 0     | 0     | 3168    | 53  |
| 54    | 0    | 0  | 1451 | 1717 | 0    | 0    | 0    | 0    | 0    | 0   | 0    | 0   | 0     | 0     | 3168    | 54  |
| 55    | 0    | 0  | 1442 | 1726 | 0    | 0    | 0    | 0    | 0    | 0   | 0    | 0   | 0     | 0     | 3168    | 55  |
| 56    | 0    | 0  | 1431 | 1737 | 0    | 0    | 0    | 0    | 0    | 0   | 0    | 0   | 0     | 0     | 3168    | 56  |
| 57    | 0    | 0  | 3089 | 79   | 0    | 0    | 0    | 0    | 0    | 0   | 0    | 0   | 0     | 0     | 3168    | 57  |
| 58    | 0    | 0  | 990  | 2178 | 0    | 0    | 0    | 0    | 0    | 0   | 0    | 0   | 0     | 0     | 3168    | 58  |
| 59    | 0    | 0  | 2654 | 514  | 0    | 0    | 0    | 0    | 0    | 0   | 0    | 0   | 0     | 0     | 3168    | 59  |
| 60    | 0    | 0  | 1918 | 1250 | 0    | 0    | 0    | 0    | 0    | 0   | 0    | 0   | 0     | 0     | 3168    | 60  |
| 61    | 0    | 0  | 2500 | 668  | 0    | 0    | 0    | 0    | 0    | 0   | 0    | 0   | 0     | 0     | 3168    | 61  |
| 62    | 247  | 12 | 26   | 14   | 2    | 3    | 1    | 1    | 1    | 0   | 41   | 1   | 2629  | 190   | 539     | 62  |
| 63    | 806  | 9  | 16   | 2190 | 20   | 81   | 3    | 28   | 5    | 1   | 1    | 1   | 1     | 6     | 3167    | 63  |
| 64    | 1036 | 0  | 1785 | 255  | 48   | 26   | 7    | 2    | 0    | 3   | 2    | 0   | 4     | 0     | 3164    | 64  |
| 65    | 1035 | 0  | 237  | 62   | 195  | 271  | 228  | 436  | 296  | 183 | 165  | 60  | 0     | 0     | 3168    | 65  |
| 66    | 649  | 0  | 2090 | 351  | 73   | 5    | 0    | 0    | 0    | 0   | 0    | 0   | 0     | 0     | 3168    | 66  |
| 67    | 648  | 0  | 227  | 31   | 70   | 37   | 42   | 106  | 94   | 259 | 1516 | 138 | 0     | 0     | 3168    | 67  |
| 68    | 0    | 0  | 30   | 922  | 1118 | 979  | 118  | 0    | 0    | 0   | 0    | 0   | 0     | 1     | 3168    | 68  |
| 69    | 0    | 0  | 30   | 922  | 1118 | 979  | 118  | 0    | 0    | 0   | 0    | 0   | 0     | 1     | 3168    | 69  |
| 70    | 331  | 0  | 221  | 636  | 385  | 575  | 314  | 360  | 21   | 237 | 87   | 0   | 0     | 1     | 3168    | 70  |
| 71    | 4    | 0  | 0    | 2410 | 689  | 42   | 17   | 1    | 0    | 0   | 0    | 0   | 0     | 5     | 3168    | 71  |
| 72    | 0    | 0  | 36   | 1358 | 97   | 1217 | 460  | 0    | 0    | 0   | 0    | 0   | 0     | 0     | 3168    | 72  |
| 73    | 198  | 0  | 1    | 2472 | 40   | 134  | 212  | 87   | 21   | 1   | 0    | 0   | 0     | 2     | 3168    | 73  |
| 74    | 3    | 0  | 40   | 10   | 705  | 741  | 690  | 552  | 302  | 103 | 19   | 1   | 2     | 0     | 3166    | 74  |
| 75    | 0    | 0  | 525  | 2040 | 595  | 3    | 0    | 0    | 0    | 0   | 0    | 0   | 4     | 1     | 3164    | 75  |
| 76    | 0    | 0  | 36   | 1358 | 97   | 1217 | 460  | 0    | 0    | 0   | 0    | 0   | 0     | 0     | 3168    | 76  |
| 77    | 0    | 0  | 525  | 2040 | 595  | 3    | 0    | 0    | 0    | 0   | 0    | 0   | 4     | 1     | 3164    | 77  |
| 78    | 0    | 0  | 19   | 1428 | 1645 | 74   | 1    | 0    | 0    | 0   | 0    | 0   | 0     | 1     | 3168    | 78  |
| 79    | 0    | 0  | 1379 | 238  | 414  | 744  | 314  | 73   | 0    | 0   | 0    | 0   | 4     | 2     | 3164    | 79  |
| 80    | 0    | 0  | 19   | 1428 | 1645 | 74   | 1    | 0    | 0    | 0   | 0    | 0   | 0     | 1     | 3168    | 80  |
| 81    | 0    | 0  | 1379 | 238  | 414  | 744  | 314  | 73   | 0    | 0   | 0    | 0   | 4     | 2     | 3164    | 81  |

## 1SINGLE COL FREQUENCIES FOR USOPOR1940-806/ NCARDS 3168

| 0 COL | &   | -   | 0    | 1    | 2    | 3    | 4    | 5    | 6   | 7   | 8   | 9   | BLANK | OTHER | NONBLNK | COL |
|-------|-----|-----|------|------|------|------|------|------|-----|-----|-----|-----|-------|-------|---------|-----|
| 82    | 18  | 0   | 2590 | 357  | 94   | 75   | 16   | 7    | 5   | 2   | 0   | 1   | 0     | 3     | 3168    | 82  |
| 83    | 18  | 0   | 115  | 2369 | 216  | 92   | 44   | 77   | 84  | 41  | 48  | 64  | 0     | 0     | 3168    | 83  |
| 84    | 21  | 1   | 2639 | 338  | 76   | 71   | 13   | 3    | 4   | 2   | 0   | 0   | 0     | 0     | 3168    | 84  |
| 85    | 22  | 1   | 122  | 2420 | 196  | 89   | 36   | 66   | 70  | 50  | 45  | 51  | 0     | 0     | 3168    | 85  |
| 86    | 0   | 0   | 20   | 2365 | 781  | 1    | 0    | 1    | 0   | 0   | 0   | 0   | 0     | 0     | 3168    | 86  |
| 87    | 17  | 0   | 345  | 566  | 290  | 415  | 85   | 177  | 231 | 138 | 71  | 22  | 811   | 0     | 2357    | 87  |
| 88    | 0   | 0   | 65   | 1059 | 440  | 808  | 521  | 271  | 0   | 0   | 0   | 0   | 1     | 3     | 3167    | 88  |
| 89    | 202 | 0   | 1061 | 1552 | 349  | 0    | 0    | 0    | 0   | 0   | 0   | 0   | 3     | 1     | 3165    | 89  |
| 90    | 202 | 0   | 326  | 293  | 738  | 172  | 145  | 127  | 152 | 270 | 615 | 126 | 2     | 0     | 3166    | 90  |
| 91    | 1   | 0   | 20   | 43   | 507  | 84   | 1175 | 1323 | 9   | 5   | 1   | 0   | 0     | 0     | 3168    | 91  |
| 92    | 0   | 0   | 105  | 2208 | 718  | 133  | 2    | 1    | 0   | 0   | 0   | 0   | 0     | 1     | 3168    | 92  |
| 93    | 0   | 0   | 3    | 55   | 348  | 1038 | 654  | 688  | 80  | 215 | 87  | 0   | 0     | 0     | 3168    | 93  |
| 94    | 0   | 0   | 176  | 1747 | 1241 | 1    | 0    | 0    | 0   | 0   | 0   | 0   | 1     | 2     | 3167    | 94  |
| 95    | 0   | 0   | 1    | 2102 | 1064 | 0    | 0    | 0    | 0   | 0   | 0   | 0   | 0     | 1     | 3168    | 95  |
| 96    | 2   | 0   | 1    | 3036 | 124  | 2    | 0    | 0    | 0   | 1   | 0   | 0   | 0     | 2     | 3168    | 96  |
| 97    | 331 | 0   | 221  | 636  | 385  | 575  | 314  | 360  | 21  | 237 | 87  | 0   | 0     | 1     | 3168    | 97  |
| 98    | 4   | 0   | 0    | 2410 | 689  | 42   | 17   | 1    | 0   | 0   | 0   | 0   | 0     | 5     | 3168    | 98  |
| 99    | 198 | 0   | 1    | 2472 | 40   | 134  | 212  | 87   | 21  | 1   | 0   | 0   | 0     | 2     | 3168    | 99  |
| 100   | 3   | 0   | 40   | 10   | 705  | 741  | 690  | 552  | 302 | 103 | 19  | 1   | 2     | 0     | 3166    | 100 |
| 101   | 3   | 0   | 677  | 235  | 285  | 228  | 216  | 542  | 255 | 209 | 320 | 198 | 0     | 0     | 3168    | 101 |
| 102   | 0   | 0   | 77   | 1461 | 1627 | 1    | 0    | 2    | 0   | 0   | 0   | 0   | 0     | 0     | 3168    | 102 |
| 103   | 46  | 0   | 2557 | 22   | 60   | 481  | 1    | 0    | 0   | 0   | 0   | 0   | 0     | 1     | 3168    | 103 |
| 104   | 46  | 0   | 127  | 1035 | 179  | 682  | 516  | 308  | 145 | 36  | 39  | 55  | 0     | 0     | 3168    | 104 |
| 105   | 0   | 0   | 343  | 211  | 77   | 92   | 202  | 84   | 9   | 204 | 210 | 236 | 1499  | 1     | 1669    | 105 |
| 106   | 82  | 93  | 312  | 171  | 161  | 182  | 56   | 62   | 20  | 40  | 286 | 203 | 1499  | 1     | 1669    | 106 |
| 107   | 164 | 123 | 649  | 92   | 0    | 1    | 42   | 2    | 1   | 235 | 55  | 210 | 1594  | 0     | 1574    | 107 |
| 108   | 0   | 0   | 85   | 221  | 171  | 78   | 198  | 242  | 25  | 36  | 208 | 22  | 1882  | 0     | 1286    | 108 |
| 109   | 0   | 0   | 0    | 647  | 554  | 305  | 655  | 382  | 622 | 1   | 0   | 0   | 0     | 2     | 3168    | 109 |
| 110   | 0   | 0   | 2772 | 207  | 187  | 1    | 0    | 0    | 0   | 0   | 0   | 0   | 1     | 0     | 3167    | 110 |
| 111   | 0   | 0   | 854  | 691  | 395  | 358  | 245  | 172  | 133 | 118 | 98  | 96  | 1     | 7     | 3167    | 111 |
| 112   | 0   | 2   | 0    | 715  | 0    | 829  | 0    | 0    | 0   | 0   | 0   | 0   | 1552  | 70    | 1616    | 112 |

# PRINCETON UNIVERSITY

SET 306-K-1-28-41

## Public Opinion Research Project

Form K

1. Do you think the United States will go into the war in Europe sometime before it is over, or do you think we will stay out of the war?

- ☐ Go in    ☒ Go in only if it is a long war    ☐ Other \_\_\_\_\_  
☒ Stay out    ☒ Go in only if Germany and Italy are winning    ☐ Undecided

2. Which side do you think will win the war—Germany and Italy, or England?

- ☐ Germany and Italy    ☐ England    ☐ Neither    ☐ Undecided

3. If the British are unable to pay cash for war materials bought in this country, should our government lend war materials to the British, to be paid back in the same materials and other goods after the war is over?

- ☐ Yes    ☒ Qualified Answer    ☒ Give, not lend    ☐ No    ☐ No Opinion

COMMENT \_\_\_\_\_

4. a. Have you been following the discussion of the President's lease-lend bill regarding aid to England and other countries, which Congress is now considering?

- ☐ Yes    ☒ Qualified Answer    ☐ No

If "Yes" or "Qualified Answer", ask b and c:

b. Do you think Congress should pass this bill?

- ☒ Yes    ☐ Qualified answer    00 = no ans    ☐ No    ☒ No Opinion

WHY? \_\_\_\_\_

c. If Congress does pass this bill, should the powers which it grants to the President be given to him for as long as the war lasts, or for only a limited period of time, such as 2 years?

- ☒ As long as war lasts    ☒ Limited period    ☒ Other 00 = no ans    ☐ No Opinion

COMMENT \_\_\_\_\_

5. a. If American merchant ships with American crews are used to carry war materials to Britain, and some of them are sunk by the Germans on the way over, would you be in favor of going to war against Germany?

- ☐ Yes    ☒ Qualified Answer    ☐ No    ☒ Don't Know

COMMENT \_\_\_\_\_

b. Do you think this would make most people want to go to war against Germany?

- ☐ Yes    ☐ No    ☒ Don't Know

WHY? \_\_\_\_\_

6. If you were asked to vote today on the question of the United States entering the war against Germany and Italy, how would you vote—to go into the war, or to stay out of the war?

- ☒ Go in    ☐ Qualified Answer    00 = no ans    ☒ Stay out    ☒ Don't Know

7. Which of these two things do you think is the more important—

- ☒ That this country keep out of war, or  
☒ That Germany be defeated, even at the risk of our getting into the war?    ☐ No Choice

WHY? \_\_\_\_\_

8. a. Suppose the United States does not go into the war, and Germany defeats England—do you think you, personally, would be affected by this German victory?

- ☐ Yes    ☒ No    ☐ Don't Know

b. If "yes", ask: In what way? \_\_\_\_\_

9. a. Can you tell me the name of the country where the armies of Greece and Italy are fighting?

- ☒ Yes    Name \_\_\_\_\_    ☒ No, no ans + d. k.

b. Can you name four leaders of European countries and tell me what country each one heads?

| Leader                         | Country                                         |
|--------------------------------|-------------------------------------------------|
| <u>Spence, Spence - no ans</u> | <u>1st Column - No. 7 Correct mentions</u>      |
|                                | <u>2nd Column - Leader + Country (See Code)</u> |

(OVER)

33, 34 10. a. Can you remember the names of five countries that Germany has conquered since the war began? UU = no ans.

- col. 35  
col. 36, 37  
col. 38, 39
- b. Can you tell me what country controls Gibraltar? ☐ Yes Name Form K ☒ No, no ans. d. k.  
c. About how many miles would you say it is from London to Berlin? \_\_\_\_\_ Miles ☒ Don't Know  
d. Do you happen to know how many years Hitler has been in power in Germany?  
☐ Yes Number of years actual + punched ☒ No, no ans. d. k.

11. Which of these two statements do you think is closer to the truth? HAND CARD TO RESPONDENT.

- col 40
- ☒ England is now fighting mainly to keep her power and wealth.  
☒ England is now fighting mainly to preserve democracy against the spread of dictatorship.  
☒ Both ☒ No Opinion 60, 61

COMMENT

col 41 12. If England defeats Germany and Italy should the peace treaty be more severe, or less severe, than the treaty at the end of the last war?

- ☒ More severe ☒ Same ☒ Less severe ☒ No Opinion 62, 63

WHY?

col 42 How strongly do you feel about this? ☒ Strongly ☒ Mildly

col 43 13. a. Do you think that in America anybody should be allowed to speak on any subject any time he wants to, or do you think there are times when free speech should be prohibited or certain subjects or speakers prohibited?

- ☒ Allow free speech at all times ☒ Free speech should be prohibited sometimes ☒ No Opinion 64

COMMENT

col 44 If "free speech should be allowed at all times" ask b:

b. Do you believe in free speech to the extent of allowing Fascists and Communists to hold meetings and express their views in this community?

- ☒ YES! ☒ Yes ☒ NO! ☒ No ☒ No Opinion

WHY?

col 45  
col 46, 47, 48  
col 49, 50 14. In what country were your parents born? Father col 45, 46 Mother col 47, 48 UUUU = no ans.

col 51 15. Are you a member of a church? ☒ Yes Which Denomination \_\_\_\_\_ ☒ No

16. Which do you think make the best teachers—men or women?

- ☒ Men ☒ Qualified answer \_\_\_\_\_ ☒ Women ☒ No Opinion

col. 52, 53 17. Can you remember the name of a teacher you had in your last year of schooling—who was it?

Name \_\_\_\_\_ Subject \_\_\_\_\_ Grade or Year \_\_\_\_\_ Name and Location of School \_\_\_\_\_

col. 54 18. a. Do you remember FOR CERTAIN whether or not you voted in the 1940 Presidential Election?

- ☒ Yes, voted ☒ No, didn't vote ☒ No, too young to vote

b. If "Yes voted", ask: Did you vote for Wilkie, Roosevelt or Thomas?

- ☒ Wilkie ☒ Roosevelt ☒ Thomas ☒ Other \_\_\_\_\_

col 55 Ask Everybody:

c. In general, do you approve or disapprove today of Roosevelt as President?

- ☒ Approve ☒ Disapprove ☒ No Opinion

col 56 ☒ Wealthy ☒ AV ☒ P ☒ OR—WPA ☒ Car ☒ Man ☒ White ☒ col 57  
☒ AV+ ☒ P+ ☒ OAA ☒ OR—Home ☒ No Car ☒ Woman ☒ Colored ☒ col 58

SPECIFIC OCCUPATION col 60, 61, 62 ESTIMATE AGE col 63, 64

STREET \_\_\_\_\_ CITY \_\_\_\_\_

col 65 Is there a telephone in your home (place where you live)? ☒ Yes ☒ No

If "yes", ask: Is the telephone listed either under your name or the name of a member of your immediate family? yes = 1 no ans. = 0 Everything else = 2 ☒ Yes ☒ No

col 73, 74, 75, 76 Interviewer \_\_\_\_\_

Date this interview was made col 66, 67

No 1746

Ballot series # col. 1, 2, 3

Form # col 4

Section col 5

State col 6

Inter. # col 7, 8

Rural-Urban col 9

Individual Questionnaire

# col. 68, 69, 70, 71

12 on col 4

**PRINCETON UNIVERSITY**  
**Public Opinion Research Project**

SET 806-T-1-29-41

Form T

Col 10  
1. Do you think the United States will go into the war in Europe, or do you think we will stay out of the war?

- ☐ Go in      ☒ Go in only if it is a long war      ☐ Other  
☒ Stay out      ☒ Go in only if Germany and Italy are winning      ☒ Undecided

11  
2. a. Which side do you think is winning the war now—Germany and Italy, or England?

- ☐ Germany and Italy      ☒ England      ☒ Neither      ☒ Undecided

12  
b. Which side do you think will win the war in the end?

- ☒ Germany and Italy      ☒ England      ☒ Neither      ☒ Undecided

3. If the British are unable to pay cash for war materials bought in this country, should our government lend war materials to the British, to be paid back in the same materials and other goods after the war is over?

- ☐ Yes      ☐ Qualified Answer      ☐ No      ☐ Don't Know

WHY?

14  
4. a. Have you heard about the President's Lease-Lend Bill now before Congress?

- ☐ Yes      ☒ Qualified Answer      ☐ No

15, 16  
b. This bill provides that British warships could use American ports to repair, refuel and rearm. Do you favor or oppose that part of the bill?

- ☒ Favor      ☐ Qualified Answer      ☒ Oppose      ☒ No Opinion

WHY?

17, 18  
c. The bill would give the President power to lend to England or any other country warplanes or any other war supplies now belonging to our Army or Navy, if the President thought that this would help the defense of the United States. Do you approve or disapprove of this part of the bill?

- ☒ Approve      ☐ Qualified Answer      ☒ Disapprove      ☒ No Opinion

WHY?

19, 20  
d. This bill would permit the President to have the United States Government pay for war materials made in this country for England or any other country which the President thinks would help our national defense. Do you favor or oppose this part of the bill?

- ☒ Favor      ☐ Qualified Answer      ☒ Oppose      ☒ No Opinion

WHY?

21, 22  
e. Do you think Congress should pass this bill?

- ☒ Yes      ☐ Qualified Answer      ☒ No      ☒ No Opinion

COMMENT

23  
f. If Congress does pass this bill, should the powers which it grants to the President be given to him for as long as the war lasts, or for only a limited period of time, such as 2 years?

- ☐ As long as war lasts      ☒ Limited period      ☒ Other      ☒ No Opinion

COMMENT

5. a. If American merchant ships with American crews are used to carry war materials to Britain, and some of them are sunk by the Germans on the way over, would you be in favor of going to war against Germany?

- ☐ Yes      ☐ Qualified Answer      ☐ No      ☐ No Opinion

WHY?

b. Do you think this would make most people want to go to war against Germany?

- ☐ Yes      ☐ No      ☐ Don't Know

COMMENT

6. If you were asked to vote today on the question of the United States entering the war against Germany and Italy, how would you vote—to go into the war, or to stay out of the war?

- ☐ Go in      ☐ Qualified Answer      ☐ Stay out      ☐ Don't Know

WHY?

25  
7. Which of these two things do you think is the more important for the United States to try to do—

- ☒ To keep out of war ourselves, or  
☒ To help England win, even at the risk of getting into the war?      ☒ No Choice

WHY?

8. a. Suppose the United States does not go into the war, and Germany defeats England—do you think you, personally, would be affected by this German victory?

- ☐ Yes      ☐ No      ☐ Don't Know

b. If "yes", ask: In what way?

(OVER)



Nº 3757

Ballot 808: 5b  
806: 8b

Code

"Suppose the U.S. does not go into the war, and Germany defeats England and France, do you think you, personally, would be affected by this Germany victory?"

If yes, "In what ways?"

- 90. No Answer
- 88. Don't know
- WV. No

#### Personal effects

- 01. Lower standard of living
- 02. Depression
- 03. Civil liberties affected
- 04. Higher taxes
- 05. Threat of dictatorship in this country (indigenous)
- 06. Prices high
- 07. Fear of being drafted and having to fight ( or members of family)
- 08. Emotional upsets
- 09. Farm markets and prices may drop
- 10. Wages cut
- 11. Jewish
- 12. Effect on relative in Europe
- 13. Fear of regimentation
- 14. Unemployment prospect
- 15. Lower stock and property values
- 16. Miscellaneous specific economic effect (Maintaining army etc.)
- 17. Loss of foreign investments
- 18. Uncertainty of future, loss security
- 29. Internal revolution - political revolution - labor will revolt
- 32. Post-war suffering - world wide repercussions

#### Non-personal effects

- 19. Trade relation suffer, markets cut
- 20. German invasion of U.S. or Hemisphere
- 21. General economic, unspecified
- 22. Germany would try to rule the world
- 23. U.S. would become involved in war
- 24. Monetary system upset, off gold standard
- 25. German threat of our institutions
- 26. General adverse, unspecified
- 27. Favorable economic and social effects
- 28. Japanese threat in the Far East
- 30. U.S. would become second-rate power
- 31. Germany will prolong the war; fight other countries -would rule Europe

"Suppose the U.S. does not go into the war, and Germany defeats England and France, do you think you, personally, would be affected by this German victory?"

If Yes, "In what ways?"

00. No answer

88. Don't know

VV. No

Personal effects

01. Lower standard of living
02. Depression
03. Civil liberties affected
04. Higher taxes
05. Threat of dictatorship in this country (indigenous)
06. Prices higher
07. Fear of being drafted (going to war - family members also
08. Emotional upsets
09. Farm markets and prices may drop
10. Wages cut
11. Jewish
12. Effect on relative in Europe
13. Fear of regimentation
14. Unemployment prospect
15. Lower stock and property values
16. Miscellaneous specific economic effect - maintain large army
17. Loss of foreign investments
18. Uncertainty of future, loss security

Non-personal effects

19. Trade relation suffer, markets cut
20. German invasion of U.S. or Hemisphere (German dictatorship)
21. General economic, unspecified
22. Germany would try to rule the world
23. U.S. would become involved in war
24. Monetary system upset, off gold standard
25. German threat to our institutions
26. General adverse, unspecified
27. Favorable economic effects

Ballot 906: 9a

Code

"Can you tell me the name of the country where the armies of Greece and Italy are fighting?"

- 0. Yes, no answer
- V. No, don't know, no answer
- 1. Albania
- 2. Greece
- 3. Italy
- 4. The Balkans
- 5. All other countries

Ballot 306: 9b

Code

"Can you name four leaders of European countries and tell me what country each one heads?"

1 column - double punched

Space - No answer and Don't know

1. Hitler - Germany
2. Mussolini - Italy
3. Stalin - Russia
4. Churchill - England
5. France - Spain
6. Petain - France
7. De Gaulle - Free France
8. De Valera - Ireland
9. Gustav - Sweden
0. Boris - Bulgaria
- V. All other correct answers (George VI-England; Emmanuel -Italy etc.)
- X. Wrong answers (non-European leaders or countries, dead, deposed, named wrong country or leader, etc.)
- X. Hand tab. of

Weygand - France 1  
Chamberlain - England 1111

806: 40

CODE

"Suppose the U.S. does not go into the war, and Germany defeats England and France, do you think you, personally, would be affected by this German victory? If yes, "in what ways"?

00 - No answer

88 - Don't know

VV - No

PERSONAL EFFECTS

- 01 - Lower standard of living
- 02 - Depression
- 03 - Civil liberties affected
- 04 - Higher taxes
- 05 - Threat of dictatorship in this country
- 06 - Prices higher
- 07 - Fear of being drafted
- 08 - Emotional upsets
- 09 - Farm markets and prices may drop
- 10 - Wages cut
- 11 - Jewish
- 12 - Effect on relative in Europe
- 13 - Fear of regimentation
- 14 - Unemployment prospect
- 15 - Lower stock and property values
- 16 - Miscellaneous specific economic effects
- 17 - Loss of foreign investments
- 18 - Uncertainty of future, loss security

NON-PERSONAL EFFECTS

- 19 - Trade relation suffer, markets cut
- 20 - German invasion of U.S. or Hemisphere
- 21 - General economic, unspecified
- 22 - Germany would try to rule the world
- 23 - U. S. would become involved in war
- 24 - Monetary system upset, off gold standard
- 25 - German threat to our institutions
- 26 - General adverse, unspecified
- 27 - Favorable economic effects

Ballot 806 - Parentage groups

- (1) United States - 01, 21, 53, 57
- (2) Axis conquered - 04, 05, 07, 08, 09, 13, 19, 20, 22, 23, 25, 28, 29, 34, 35, 36, 37, 45, 48
- (3) Axis - 02, 03, 11, 38, 39, 41, 50
- (4) Allies - 06, 12, 14, 17, 24, 27, 30, 42, 43, 44, 46, 47, 49, 51, 55, 56, 33
- (5) Mexico, Switzerland,  
Portugal, Ireland, - 10, 16, 18, 26, 31, 32, 33, 40, 54 - independent  
Turkey, Sweden,  
Yugoslavia

\*derived from nationality code

"Can you remember the names of five countries that Germany has conquered since the war began?"

2 columns

1st column

- V. No answer, Don't know, No
- 1. 1 correct country
- 2. 2 correct countries.
- 3. 3 correct countries
- etc.

2nd column

- V. D.K., No answer, etc.
- 1. Poland
- 2. Rumania
- 3. Denmark
- 4. Norway
- 5. Netherlands (Holland)
- 6. Belgium
- 7. Luxembourg
- 8. France
- 9. Austria
- 0. Czechoslovakia
- X. Incorrect countries



Ballot 806 : 10b

Code

"Can you tell me what country controls Gibraltar?"

V. No, no answer, D.K.

1. England

2. France

3. Spain

4. U.S.

5. Italy

6. Germany

7. Russia

8. Portugal

9. Libya

0. Turkey

Sp Egypt

X All others

Ballot 808-K

10-c.

About how many miles would you say it is from London to Berlin?

|               |       |
|---------------|-------|
| 100 and below | - 4.0 |
| 200-499       | 30.3  |
| 500-799       | 40.0  |
| 800-1,099     | 16.2  |
| 1100-1,999    | 11.6  |
| 2000 and over | - 3.9 |

10-d.

Do you happen to know how many years Hitler has been in power in Germany?

|         |      |
|---------|------|
| 1 - 4   | 2.5  |
| 5 - 6   | 5.7  |
| 7 - 9   | 75.0 |
| 10-11   | 7.6  |
| over 12 | 9.2  |

INFORMATION GROUPING

Ballot #806

Name of country where fighting: Albania 2, <sup>Balkans</sup>  
Greece or Italy: 1

Four leaders: 1 for each correct

Five countries conquered: 1 each

Control of Gibraltar: England only: 1

Miles London to Berlin (600 correct) 600: 3; 500 or 700: 2; 400 or 800: 1

How long Hitler in power (8 years correct): 7, 8, 9, years: 2; 6, 10 years: 1

Composition of Groups

Lower scores: 0 - 8

Middle scores: 9 - 14

Upper scores: 15 - 21

*Copy 5 million questions*

England is now fighting mainly to preserve democracy against the spread of dictatorship.

- 00. No comment
  - 01. England proved this by attempting to protect other countries from Hitler's domination.
  - 02. Sympathize with England in her effort to keep herself and other countries in Europe from dictatorship under Hitler.
  - 03. England is fighting for her freedom--to save her people from slavery.
  - 04. England is fighting our battle-- U.S. and England are last two great democracies.
  - 05. Started fighting to preserve her wealth and power--now fighting for democracy.
  - 06. If Hitler (Germany) wins, there will be continuous war.
  - 07. That is why she entered the war-- wealth and power did not enter in.
  - 08. If she were fighting for power and wealth, she would have been prepared for war
  - 09. She could have kept here power and wealth without fighting
  - 10. Mass of English people are fighting for democracy; some classes, for power and wealth.
  - 11. If she loses, all of Europe will be under Hitler's domination
  - 12. Fighting a battle of principle for all English-speaking peoples
  - 13. England is a democracy--fighting for her principles
  - 14. She feels dictatorship is wrong--would not be allowed to spread anywhere
  - 15. Knows if she loses her democracy, her wealth and power go with it
  - 16. She is spending her wealth to protect democracy--carry on the war
  - 17. That is what she professes to do--otherwise U.S. would not want to help her
98. No opinion

England is now fighting mainly to keep her power and wealth

38. No comment
40. That is the main reason why any country goes to war or fights to defend itself
41. Entered the fight to save democracy; now fighting for her Empire and her life
42. She didn't help other countries against Hitler as she agreed
43. Prestige of power and wealth of her empire, first consideration (jealous and proud)
44. England has always been the aggressor
45. England is not a democracy- none in Europe
46. She has untouched reserve of resources and no intention of using them
47. Greatest sea-power in the world and must win to protect her far-flung empire
48. "Save democracy"-- propaganda; real reason--wealth
49. England is trying to set-up a dictatorship herself-- power-mad
50. England has her back to the wall for the first time
51. Her power and wealth at stake--democracy just a sideline
52. Together(Eng. and U.S.) should rule the world.
53. Fighting for her trade.
54. If not, she wouldn't have spent so much money to put Hitler in power
55. History proves she has fought for wealth and power always
56. England is undemocratic in policy of governing her empire.
57. Fought originally to keep Europe as it was; now fighting to save her possessions
58. England as much to blame for war as Germany
59. Dislike English policy but to our advantage for her to win
60. Her foreign policy is proof--willing to ally herself with anyone who can help her
61. A powerful England is a safeguard against dictatorships (such as Germany)
62. Without power and wealth, she couldn't have a strong democracy
63. With all her power and wealth, she doesn't pay her debts to U.S.
64. Knows she can win only with help of U.S.-- and will use us whenever possible

806: 11c Both

- 99. No comment
- 71. To maintain democracy, she must have wealth and vice-versa
- 72. She is fighting against Germany for her life--democracy and wealth alike
- 73. England has been the leading nation both in democracy and power and wealth-- she wants to keep both
- 74. Democracy is more important to them, but they are fighting for both
- 75. If she loses her sea-power to Hitler, she loses both democracy and power
- 76. Two factors fighting for different reasons--poor for democracy, wealthy for power
- 77. Fighting for both--result may be a real democracy economically and politically
- 78. Started fighting to preserve her power and wealth, but fighting for both now
- 79. Dictatorship is encroaching on her power
- 80. Fighting to make the world safe (in both respects) from Hitler
- 81. Fighting to preserve the status quo (Europe as it was)
- 82. Last great country left--only one not dominated by Hitler
- 83. England doesn't deserve more U.S. help unless she reciprocates

XX. No Opinion

HOW PEOPLE THINK THEY WOULD BE PERSONALLY AFFECTED BY A  
GERMAN VICTORY

Comment analyses of those who answer "Yes" to the question:  
"Suppose the United States does not go into the war, and  
Germany defeats England -- do you think you, personally,  
would be affected by this German victory?"  
Is "Yes", in what ways?

Ballot 802  
July 1940

Ballot 805  
December 1940

|        |                                                     |        |
|--------|-----------------------------------------------------|--------|
| 26.0%  | PERSONAL EFFECTS ("Personal" liberally interpreted) | 28.9%  |
| 5.4%   | Lower standard of living                            | 4.6%   |
| 4.4    | Depression                                          | 2.8    |
| 3.3    | Civil liberties affected                            | 5.3    |
| 2.2    | Higher taxes                                        | 2.0    |
| 2.0    | Threat of dictatorship in this country              | 4.6    |
| 1.7    | Prices higher                                       | 1.2    |
| 1.7    | Fear of being drafted                               | 1.7    |
| 1.0    | Emotional upsets                                    | 0.5    |
| 0.9    | Farm markets & prices may drop                      | 1.5    |
| 0.9    | Wages cut                                           | 1.0    |
| 0.8    | Jewish                                              | 0.5    |
| 0.4    | Effect on relative in Europe                        | 0.1    |
| 0.4    | Fear of regimentation                               | 1.2    |
| 0.3    | Unemployment prospect                               | 0.4    |
| 0.2    | Lower stock & property values                       | 0.0    |
| 0.2    | Miscellaneous specific economic effects             | 0.7    |
| 0.1    | Loss of foreign investments                         | 0.0    |
| 0.1    | Uncertainty of future, loss security                | 0.8    |
| 62.1%  | NON-PERSONAL EFFECTS                                | 66.3%  |
| 16.9%  | Trade relation suffer, markets cut                  | 15.0%  |
| 15.6   | German invasion of U. S. or Hemisphere              | 14.5   |
| 12.9   | General economic, unspecified                       | 15.7   |
| 7.7    | General adverse, unspecified                        | 10.9   |
| 3.3    | Germany would try to rule the world                 | 1.8    |
| 2.5    | U. S. would become involved in war                  | 3.9    |
| 2.1    | Monetary system upset, off gold standard            | 1.6    |
| 1.1    | German threat to our institutions                   | 2.9    |
| 11.9%  | NO COMMENTS GIVEN                                   | 4.8%   |
| 100.0% |                                                     | 100.0% |

HOW PEOPLE THINK THEY WOULD BE PERSONALLY AFFECTED BY A  
GERMAN VICTORY

Comment analyses of those who answer "Yes" to the question:  
"Suppose the United States does not go into the war, and  
Germany defeats England -- do you think you, personally,  
would be affected by this German victory?"  
Is "Yes", in what ways?

Ballot 802  
July 1940

Ballot 805  
December 1940

|        |                                                     |        |
|--------|-----------------------------------------------------|--------|
| 26.0%  | PERSONAL EFFECTS ("Personal" liberally interpreted) | 28.9%  |
| 5.4%   | Lower standard of living                            | 4.6%   |
| 4.4    | Depression                                          | 2.8    |
| 3.3    | Civil liberties affected                            | 5.3    |
| 2.2    | Higher taxes                                        | 2.0    |
| 2.0    | Threat of dictatorship in this country              | 4.6    |
| 1.7    | Prices higher                                       | 1.2    |
| 1.7    | Fear of being drafted                               | 1.7    |
| 1.0    | Emotional upsets                                    | 0.5    |
| 0.9    | Farm markets & prices may drop                      | 1.5    |
| 0.9    | Wages cut                                           | 1.0    |
| 0.8    | Jewish                                              | 0.5    |
| 0.4    | Effect on relative in Europe                        | 0.1    |
| 0.4    | Fear of regimentation                               | 1.2    |
| 0.3    | Unemployment prospect                               | 0.4    |
| 0.2    | Lower stock & property values                       | 0.0    |
| 0.2    | Miscellaneous specific economic effects             | 0.7    |
| 0.1    | Loss of foreign investments                         | 0.0    |
| 0.1    | Uncertainty of future, loss security                | 0.8    |
| 62.1%  | NON-PERSONAL EFFECTS                                | 66.3%  |
| 16.9%  | Trade relation suffer, markets out                  | 15.0%  |
| 15.6   | German invasion of U. S. or Hemisphere              | 14.5   |
| 12.9   | General economic, unspecified                       | 15.7   |
| 7.7    | General adverse, unspecified                        | 10.9   |
| 3.3    | Germany would try to rule the world                 | 1.8    |
| 2.5    | U. S. would become involved in war                  | 3.9    |
| 2.1    | Monetary system upset, off gold standard            | 1.3    |
| 1.1    | German threat to our institutions                   | 2.9    |
| 11.9%  | NO COMMENTS GIVEN                                   | 4.8%   |
| 100.0% |                                                     | 100.0% |



| BALLOT SET # |           | Cols. 1 2 3 | SECTION and STATE (CONT.)   |            | OCCUPATIONS:            | Col. 32 |
|--------------|-----------|-------------|-----------------------------|------------|-------------------------|---------|
| Code # 243   |           |             |                             | Code #     | Code #                  |         |
| BALLOT FORM: | Col. 4    |             | Section 6                   | 61 Mont.   | 1 Farmers               |         |
|              | Code #    |             | Rocky Mt.                   | 62 Ariz.   | 2 Business Men          |         |
|              | X - 1     |             |                             | 63 Colo.   | 3 White Collar          |         |
|              | T - 2     |             |                             | 64 Idaho   | 4 Skilled Labor         |         |
|              |           |             |                             | 65 Wyo.    | 5 Semi-skilled Labor    |         |
|              |           |             |                             | 66 Utah    | 6 Farm Labor            |         |
|              |           |             |                             | 67 Nev.    | 7 Unskilled Labor       |         |
|              |           |             |                             | 68 N. Mex. | 8 Servants              |         |
| SECTION      | Col. 5    |             | Section 7                   | 71 Calif.  | 0 Professional          | Col. 33 |
| STATE        | Col. 6    |             | Pacific Coast               | 72 Oregon  |                         |         |
|              | Code #    |             |                             | 73 Wash.   |                         |         |
| Section 1    | 11 Maine  |             | INTERVIEWER:                | Cols. 7 8  | 1 Breadwinner           |         |
| New England  | 12 N. H.  |             | See cross-section volume    |            | 2 Housewife             |         |
|              | 13 Vt.    |             | For individual inter-       |            | 3 Student               |         |
|              | 14 Mass.  |             | viewer's number.            |            | 4 Son or daughter       |         |
|              | 15 R. I.  |             |                             |            | 5 Mother                |         |
|              | 16 Conn.  |             |                             |            |                         | Col. 34 |
| Section 2    | 21 N. Y.  |             | INTERVIEWS MADE BY SUB-     |            | 1 Employed              |         |
| Middle Atl.  | 22 N. J.  |             | STITUTE INTERVIEWER:        |            | 2 Unemployed            |         |
|              | 23 Penn.  |             |                             |            | 3 Retired               |         |
|              | 24 Md.    |             | V on Col. 7                 |            | 4 WPA                   |         |
|              | 25 Del.   |             | (This is a double punch)    |            | 5 OR-Home Relief        |         |
|              | 26 W. Va. |             |                             |            | 6 Widow                 |         |
| Section 3    | 31 Ohio   |             | TOWN OR CITY:               | Cols. 7 8  | DATE OF INTERVIEW:      |         |
| East Central | 32 Mich.  |             | Use interviewer's number to |            | Cols. 42 43             |         |
|              | 33 Ind.   |             | sort out town or city.      |            | Actual date is punched. |         |
|              | 34 Ill.   |             | See cross-section volume    |            | For month, see sendout  |         |
| Section 4    | 41 Wis.   |             | for individual inter-       |            | date in upper righthand |         |
| West Central | 42 Minn.  |             | viewer's number.            |            | corner of ballot.       |         |
|              | 43 Iowa   |             | <i>not available</i>        |            |                         |         |
|              | 44 Mo.    |             |                             |            |                         |         |
|              | 45 N. D.  |             | RURAL-URBAN:                | Col. 9     |                         |         |
|              | 46 S. D.  |             |                             |            |                         |         |
|              | 47 Neb.   |             | Code #                      |            |                         |         |
|              | 48 Kansas |             | 1 Farm population           |            |                         |         |
| Section 5    | 51 N. C.  |             | 2 Towns under 2500          |            |                         |         |
| Southern     | 52 S. C.  |             | Towns and cities:           |            |                         |         |
|              | 53 Va.    |             | 3 2500 to 10,000            |            |                         |         |
|              | 54 Ga.    |             | 4 10,000 to 100,000         |            |                         |         |
|              | 55 Ala.   |             | 5 100,000 to 500,000        |            |                         |         |
|              | 56 Ark.   |             | 6 500,000 and over          |            |                         |         |
|              | 57 Fla.   |             | 7 Rural non-farm            |            |                         |         |
|              | 58 Ky.    |             |                             |            |                         |         |
|              | 59 La.    |             |                             |            |                         |         |
|              | 81 Miss.  |             |                             |            |                         |         |
|              | 82 Okla.  |             |                             |            |                         |         |
|              | 33 Tenn.  |             |                             |            |                         |         |
|              | 34 Texas  |             |                             |            |                         |         |

NOTE: SP=Reject bin and counter, V=12 bin and counter, X=11 bin and counter.
