# Supplementary material
Source: publisher figshare collection journal article supplement (https://sage.figshare.com/ndownloader/files/24995266)
Supplement: Supplementary file 4 [file 24995266]

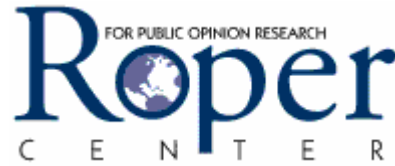

*USPEW2002-01NII*

|                                       |                                                                                                                          |
|---------------------------------------|--------------------------------------------------------------------------------------------------------------------------|
| <b>Country:</b>                       | United States                                                                                                            |
| <b>Title:</b>                         | PSRA/Pew Poll # 01NII: January News Interest Index--Politics/Television/Iraq                                             |
| <b>Survey</b>                         | Princeton Survey Research Associates                                                                                     |
| <b>Sponsor:</b>                       | Pew Research Center for the People & the Press                                                                           |
| <b>Field Dates:</b>                   | January 9-13, 2002                                                                                                       |
| <b>Sample:</b>                        | National adult                                                                                                           |
| <b>Sample Size:</b>                   | 1,201                                                                                                                    |
| <b>Sample Notes:</b>                  | An addition sample was conducted to ask a question about Enron. The interview date was 1/14-15/2002, sample size of 406. |
| <b>Interview method:</b>              | Telephone                                                                                                                |
| <b>Weight Location:</b>               | Columns 627-631 (xx.xx)                                                                                                  |
| <b>No. of records per respondent:</b> | 1                                                                                                                        |
| <b>Usage Notes:</b>                   | Addition sample weight: Columns 143-146 (xx.xx).                                                                         |

**Please note that data purchased from The Roper Center for Public Opinion Research may not be redisseminated without written permission. The results of any analyses conducted on the data may, however, be published with appropriate acknowledgments and source citation.**

| Variable | Rec | Start | End | Format |
|----------|-----|-------|-----|--------|
| RESP     | 1   | 1     | 8   | F8.0   |
| STATUS   | 1   | 9     | 9   | F1.0   |
| FPROJ    | 1   | 10    | 13  | A4     |
| TIMEZONE | 1   | 14    | 14  | F1.0   |
| ODATE    | 1   | 15    | 22  | A8     |
| OTIME    | 1   | 23    | 30  | A8     |
| OTIMER   | 1   | 31    | 38  | A8     |
| OATTMPT  | 1   | 39    | 39  | F1.0   |
| ODOW     | 1   | 40    | 40  | F1.0   |
| CDATE    | 1   | 41    | 48  | A8     |
| CTIME    | 1   | 49    | 56  | A8     |
| CTIMER   | 1   | 57    | 64  | A8     |
| CATTMPT  | 1   | 65    | 65  | F1.0   |
| CDOW     | 1   | 66    | 66  | F1.0   |
| CSHIFT   | 1   | 67    | 72  | A6     |
| DPQUOTA  | 1   | 73    | 73  | F1.0   |
| DISPO    | 1   | 74    | 76  | F3.0   |
| ISMSSMP  | 1   | 77    | 106 | A30    |
| QPDAT    | 1   | 107   | 136 | A30    |
| QPRUN    | 1   | 137   | 139 | A3     |
| QKEY     | 1   | 140   | 144 | A5     |
| QREP     | 1   | 145   | 145 | A1     |
| QTZ      | 1   | 146   | 146 | A1     |
| QREGION  | 1   | 147   | 147 | A1     |
| QCENDIV  | 1   | 148   | 148 | A1     |
| QMAS     | 1   | 149   | 152 | A4     |
| QDMARANK | 1   | 153   | 155 | A3     |
| QSTATECD | 1   | 156   | 157 | A2     |
| QUSRCODE | 1   | 158   | 158 | A1     |
| QMARKET  | 1   | 159   | 159 | A1     |
| D1       | 1   | 160   | 160 | F1.0   |
| GDRA     | 1   | 161   | 161 | F1.0   |
| FORM     | 1   | 162   | 162 | F1.0   |
| Q1       | 1   | 163   | 163 | F1.0   |
| Q2       | 1   | 164   | 164 | F1.0   |
| Q3       | 1   | 165   | 165 | F1.0   |
| Q5A      | 1   | 166   | 166 | F1.0   |
| Q5B      | 1   | 167   | 167 | F1.0   |
| Q6A      | 1   | 168   | 168 | F1.0   |
| Q6B      | 1   | 169   | 169 | F1.0   |
| Q6C      | 1   | 170   | 170 | F1.0   |
| Q6D      | 1   | 171   | 171 | F1.0   |
| Q6E      | 1   | 172   | 172 | F1.0   |
| Q6F      | 1   | 173   | 173 | F1.0   |
| Q7_1     | 1   | 174   | 174 | F1.0   |
| Q7_2     | 1   | 175   | 175 | F1.0   |
| Q7_3     | 1   | 176   | 176 | F1.0   |
| Q7_4     | 1   | 177   | 177 | F1.0   |

|         |   |     |     |      |
|---------|---|-----|-----|------|
| Q7_5    | 1 | 178 | 178 | F1.0 |
| Q7_6    | 1 | 179 | 179 | F1.0 |
| Q7_7    | 1 | 180 | 180 | F1.0 |
| Q7_8    | 1 | 181 | 181 | F1.0 |
| Q7_9    | 1 | 182 | 182 | F1.0 |
| BQ8     | 1 | 183 | 183 | F1.0 |
| Q8FA_1  | 1 | 184 | 184 | F1.0 |
| Q8FA_2  | 1 | 185 | 185 | F1.0 |
| Q8FA_3  | 1 | 186 | 186 | F1.0 |
| Q8FA_4  | 1 | 187 | 187 | F1.0 |
| Q8FA_5  | 1 | 188 | 196 | F9.0 |
| Q8FA_6  | 1 | 197 | 197 | F1.0 |
| Q8FA_7  | 1 | 198 | 198 | F1.0 |
| Q8FA_8  | 1 | 199 | 199 | F1.0 |
| Q8FA_9  | 1 | 200 | 200 | F1.0 |
| Q8FA_10 | 1 | 201 | 201 | F1.0 |
| Q8FB_1  | 1 | 202 | 202 | F1.0 |
| Q8FB_2  | 1 | 203 | 203 | F1.0 |
| Q8FB_3  | 1 | 204 | 204 | F1.0 |
| Q8FB_4  | 1 | 205 | 205 | F1.0 |
| Q8FB_5  | 1 | 206 | 206 | F1.0 |
| Q8FB_6  | 1 | 207 | 207 | F1.0 |
| Q8FB_7  | 1 | 208 | 208 | F1.0 |
| Q8FB_8  | 1 | 209 | 209 | F1.0 |
| Q8FB_9  | 1 | 210 | 210 | F1.0 |
| Q8FB_10 | 1 | 211 | 211 | F1.0 |
| Q8FC_1  | 1 | 212 | 212 | F1.0 |
| Q8FC_2  | 1 | 213 | 213 | F1.0 |
| Q8FC_3  | 1 | 214 | 214 | F1.0 |
| Q8FC_4  | 1 | 215 | 215 | F1.0 |
| Q8FC_5  | 1 | 216 | 216 | F1.0 |
| Q8FC_6  | 1 | 217 | 217 | F1.0 |
| Q8FC_7  | 1 | 218 | 218 | F1.0 |
| Q8FC_8  | 1 | 219 | 219 | F1.0 |
| Q8FC_9  | 1 | 220 | 220 | F1.0 |
| Q8FC_10 | 1 | 221 | 221 | F1.0 |
| Q9      | 1 | 222 | 222 | F1.0 |
| Q10     | 1 | 223 | 223 | F1.0 |
| Q11     | 1 | 224 | 224 | F1.0 |
| Q12     | 1 | 225 | 225 | F1.0 |
| Q13     | 1 | 226 | 226 | F1.0 |
| Q14     | 1 | 227 | 227 | F1.0 |
| Q16A    | 1 | 228 | 228 | F1.0 |
| Q16B    | 1 | 229 | 229 | F1.0 |
| Q16C    | 1 | 230 | 230 | F1.0 |
| Q16D    | 1 | 231 | 231 | F1.0 |
| Q16E    | 1 | 232 | 232 | F1.0 |
| Q16F    | 1 | 233 | 233 | F1.0 |
| Q16G    | 1 | 234 | 234 | F1.0 |
| Q16I    | 1 | 235 | 235 | F1.0 |
| Q16J    | 1 | 236 | 236 | F1.0 |
| Q16K    | 1 | 237 | 237 | F1.0 |
| Q16L    | 1 | 238 | 238 | F1.0 |

|        |   |     |     |      |
|--------|---|-----|-----|------|
| Q16M   | 1 | 239 | 239 | F1.0 |
| Q16N   | 1 | 240 | 240 | F1.0 |
| Q16O   | 1 | 241 | 241 | F1.0 |
| Q16Q   | 1 | 242 | 242 | F1.0 |
| Q16R   | 1 | 243 | 243 | F1.0 |
| Q16S   | 1 | 244 | 244 | F1.0 |
| Q16T   | 1 | 245 | 245 | F1.0 |
| Q16U   | 1 | 246 | 246 | F1.0 |
| Q16V   | 1 | 247 | 247 | F1.0 |
| Q16W   | 1 | 248 | 248 | F1.0 |
| Q16X   | 1 | 249 | 249 | F1.0 |
| Q17    | 1 | 250 | 250 | F1.0 |
| Q18F1  | 1 | 251 | 251 | F1.0 |
| Q19F2  | 1 | 252 | 252 | F1.0 |
| Q20    | 1 | 253 | 253 | F1.0 |
| Q20A   | 1 | 254 | 254 | F1.0 |
| Q21    | 1 | 255 | 255 | F1.0 |
| Q22A   | 1 | 256 | 256 | F1.0 |
| Q22B   | 1 | 257 | 257 | F1.0 |
| Q22C   | 1 | 258 | 258 | F1.0 |
| Q22D   | 1 | 259 | 259 | F1.0 |
| Q22E   | 1 | 260 | 260 | F1.0 |
| Q22F   | 1 | 261 | 261 | F1.0 |
| Q22G   | 1 | 262 | 262 | F1.0 |
| Q22H   | 1 | 263 | 263 | F1.0 |
| Q22I   | 1 | 264 | 264 | F1.0 |
| Q22J   | 1 | 265 | 265 | F1.0 |
| Q23    | 1 | 266 | 266 | F1.0 |
| Q25    | 1 | 267 | 267 | F1.0 |
| Q26    | 1 | 268 | 268 | F1.0 |
| Q27    | 1 | 269 | 269 | F1.0 |
| Q29    | 1 | 270 | 270 | F1.0 |
| Q30F1  | 1 | 271 | 271 | F1.0 |
| Q31F2  | 1 | 272 | 272 | F1.0 |
| Q32A   | 1 | 273 | 273 | F1.0 |
| Q32B   | 1 | 274 | 274 | F1.0 |
| Q32C   | 1 | 275 | 275 | F1.0 |
| CZ1    | 1 | 276 | 276 | F1.0 |
| CZ2    | 1 | 277 | 277 | F1.0 |
| CZ3    | 1 | 278 | 278 | F1.0 |
| Q34AF1 | 1 | 279 | 279 | F1.0 |
| Q34BF2 | 1 | 280 | 280 | F1.0 |
| Q34C   | 1 | 281 | 281 | F1.0 |
| Q34DF1 | 1 | 282 | 282 | F1.0 |
| Q34EF2 | 1 | 283 | 283 | F1.0 |
| Q35    | 1 | 284 | 284 | F1.0 |
| Q36    | 1 | 285 | 285 | F1.0 |
| Q37    | 1 | 286 | 286 | F1.0 |
| Q38    | 1 | 287 | 287 | F1.0 |
| Q39F1  | 1 | 288 | 288 | F1.0 |
| Q40F2  | 1 | 289 | 289 | F1.0 |
| Q41    | 1 | 290 | 290 | F1.0 |
| Q45A   | 1 | 291 | 291 | F1.0 |

|         |   |     |     |      |
|---------|---|-----|-----|------|
| Q45B    | 1 | 292 | 292 | F1.0 |
| Q45C    | 1 | 293 | 293 | F1.0 |
| Q45D    | 1 | 294 | 294 | F1.0 |
| Q45E    | 1 | 295 | 295 | F1.0 |
| Q45F    | 1 | 296 | 296 | F1.0 |
| Q45G    | 1 | 297 | 297 | F1.0 |
| Q45H    | 1 | 298 | 298 | F1.0 |
| Q46     | 1 | 299 | 299 | F1.0 |
| Q47     | 1 | 300 | 300 | F1.0 |
| D2      | 1 | 301 | 303 | F3.0 |
| D3      | 1 | 304 | 304 | F1.0 |
| D4      | 1 | 305 | 305 | F1.0 |
| BD5     | 1 | 306 | 306 | F1.0 |
| D5      | 1 | 307 | 307 | F1.0 |
| D6      | 1 | 308 | 308 | F1.0 |
| D7      | 1 | 309 | 309 | F1.0 |
| D8      | 1 | 310 | 311 | F2.0 |
| D8@     | 1 | 312 | 566 | A255 |
| D9      | 1 | 567 | 567 | F1.0 |
| D10     | 1 | 568 | 568 | F1.0 |
| D11     | 1 | 569 | 569 | F1.0 |
| D11A    | 1 | 570 | 570 | F1.0 |
| D12     | 1 | 571 | 571 | F1.0 |
| D12A    | 1 | 572 | 572 | F1.0 |
| D13     | 1 | 573 | 573 | F1.0 |
| D14     | 1 | 574 | 574 | F1.0 |
| D15     | 1 | 575 | 575 | F1.0 |
| D16     | 1 | 576 | 576 | F1.0 |
| D17     | 1 | 577 | 577 | F1.0 |
| BD18    | 1 | 578 | 578 | F1.0 |
| D18     | 1 | 579 | 579 | F1.0 |
| D19     | 1 | 580 | 580 | F1.0 |
| FEND    | 1 | 581 | 590 | A10  |
| FDATE   | 1 | 591 | 596 | A6   |
| FTIMEDI | 1 | 597 | 604 | A8   |
| FTIMEDR | 1 | 605 | 612 | A8   |
| FSHIFT  | 1 | 613 | 618 | A6   |
| FDOW    | 1 | 619 | 626 | F8.2 |
| WGT     | 1 | 627 | 631 | F5.2 |

**PEW RESEARCH CENTER FOR THE PEOPLE & THE PRESS  
& COUNCIL ON FOREIGN RELATIONS  
JANUARY 2002 NEWS INTEREST INDEX  
C FINAL QUESTIONNAIRE C**

Hello, I am \_\_\_\_ calling for Princeton Survey Research Associates in Princeton, New Jersey. We are conducting a telephone opinion survey for leading newspapers and TV stations around the country. I'd like to ask a few questions of the YOUNGEST MALE, 18 years of age or older, who is now at home. **[IF NO MALE, ASK:** May I please speak with the OLDEST FEMALE, 18 years of age or older, who is now at home?]

Q.1 Do you approve or disapprove of the way George W. Bush is handling his job as president? **[IF DK ENTER AS DK. IF DEPENDS PROBE ONCE WITH:** Overall do you approve or disapprove of the way George W. Bush is handling his job as President? **IF STILL DEPENDS ENTER AS DK]** {11-01}

- 1 Approve
- 2 Disapprove
- 9 Don't know/Refused (VOL.)

Q.2 Do you approve or disapprove of the job the Democratic leaders in Congress are doing? **[IF DK ENTER AS DK. IF DEPENDS PROBE ONCE WITH:** Overall do you approve or disapprove of the job the Democratic leaders in Congress are doing? **IF STILL DEPENDS ENTER AS DK]** {Early 9-01}

- 1 Approve
- 2 Disapprove
- 9 Don't know/Refused (VOL.)

Q.3 Do you approve or disapprove of the way George W. Bush is handling the economy? **[IF DK ENTER AS DK. IF "DEPENDS" PROBE ONCE WITH:** Overall, do you approve or disapprove of the way George W. Bush is handling the economy? **IF STILL DEPENDS ENTER AS DK]** {Early 9-01}

- 1 Approve
- 2 Disapprove
- 9 Don't Know/Refused (VOL.)

[NO Q.4]

- Q.5 Next, I would like to ask you about some things that have been in the news. Not everyone will have heard about them. First, **[ROTATE ITEMS a AND b]**
- a. Do you happen to know the name of the country in Latin America that recently has been in a political and economic crisis? *{new}*
- 1 Argentina *{correct}*
  - 2 Another country
  - 9 Don't know/Refused
- b. A dog owned by a former president was recently killed by an automobile. Do you happen to know the dog's name? *{new}*
- 1 Buddy *{correct}*
  - 2 Another name
  - 9 Don't Know/Refused
- Q.6 Now I will read a list of some stories covered by news organizations this past month. As I read each item, tell me if you happened to follow this news story very closely, fairly closely, not too closely, or not at all closely? **[INSERT ITEM; ROTATE]**
- a. The U.S. military effort in Afghanistan *{12-01}*
- b. Reports on the failed suicide bombing of an American Airlines jet coming from Paris *{new}*
- c. Reports about the condition of the U.S. economy *{12-01}*
- d. Tensions between India and Pakistan *{new}*
- e. Economic and political instability in Argentina *{new}*
- f. The trial of a Massachusetts man accused of beating another father to death during a youth hockey practice *{new}*
- 1 Very closely
  - 2 Fairly closely
  - 3 Not too closely
  - 4 Not at all closely
  - 9 Don't know/Refused **(VOL.)**
- Q.7 How have you been getting most of your news about national and international issues? From television, from newspapers, from radio, from magazines, or from the Internet? **[ACCEPT TWO ANSWERS: IF ONLY ONE RESPONSE IS GIVEN, PROBE FOR ADDITIONAL RESPONSE]** *{11-01 mod.}*
- 1 Television
  - 2 Newspapers
  - 3 Radio
  - 4 Magazines
  - 5 Internet
  - 6 Other **(VOL.)**
  - 9 Don't know/Refused **(VOL.)**

**[IF RESPONDENT ANSWERED '1' TELEVISION AS EITHER 1ST OR 2ND RESPONSE IN Q.7  
ASK Q.8. IF NOT, SKIP TO Q.9]**

**[ASK FORM A ONLY:]**

Q.8FA Do you get most of your news about national and international issues from network TV news, from local TV news, or from cable news networks such as CNN, MSNBC, and the Fox News Channel?

**[ACCEPT TWO ANSWERS BUT DO NOT PROBE]** *{standard, 11-01}*

- 1 Network TV news
- 2 Local TV news
- 3 Cable news
- 4 Other (**VOL.**)
- 9 Don't know/Refused (**VOL.**)

**[ASK FORM B ONLY:]**

Q.8FB Do you get most of your news about national and international issues from network TV news, from local TV news, or from cable news networks? **[ACCEPT TWO ANSWERS BUT DO NOT**

**PROBE]** *{new test}*

- 1 Network TV news
- 2 Local TV news
- 3 Cable news
- 4 Other (**VOL.**)
- 9 Don't know/Refused (**VOL.**)

**[ASK FORM C ONLY:]**

Q.8FC Do you get most of your news about national and international issues from **[READ, IN ORDER. ACCEPT MULTIPLE ANSWERS BUT DO NOT PROBE FOR ADDITIONAL]** *{new test}*

- 1 Local news programming
- 2 ABC Network news
- 3 CBS Network news
- 4 NBC Network news
- 5 CNN Cable news
- 6 MSNBC Cable news
- 7 The Fox News Cable Channel
- 8 CNBC Cable news
- 9 **[DO NOT READ]** Don't know/Refused (**VOL.**)

**[ASK ALL:]**

Q.9 In your opinion, who has been doing the best job of covering the news lately (**READ RESPONSES**) *{1-99}*

- 1 Newspapers
- 2 Local TV news
- 3 Network TV news
- 4 Cable TV news
- 5 News magazines
- 6 Radio, OR
- 7 Online sources
- 9 None of the above (**VOL.**)/Don't know (**VOL.**)



On a different subject...

Q.10 Compared with the past presidents, do you feel that Bill Clinton will turn out to have been one of the very best, better than most, not as good as most, or definitely worse than most of them?  
*{NBC/WSJ March 1-4, 2001}*

- 1 One of the very best
- 2 Better than most
- 3 Not as good as most
- 4 Definitely worse than most
- 9 Not sure

Q.11 Over the course of the next year, do you think the financial situation of you and your family will improve a lot, improve some, get a little worse or get a lot worse? *{6-01; trend back to 1992}*

- 1 Improve a lot
- 2 Improve some
- 3 Stay the same (**VOL.**)
- 4 Get a little worse
- 5 Get a lot worse
- 9 Don't know/Refused

Q.12 A year from now, do you expect that economic conditions in the country as a whole will be better than they are at present, or worse, or just about the same as now? *{6-00, 10-98, trend to 1988}*

- 1 Better
- 2 Worse
- 3 Same
- 9 Don't know/Refused (**VOL.**)

Q. 13 In your opinion, is President Bush doing as much as he can to improve economic conditions or do you think he could be doing more? *{3-92 mod.}*

- 1 Doing all he can
- 2 Could be doing more
- 9 Can't say

Q.14 If you had to say, which do you think is mostly responsible for the nation's economic downturn...  
**[READ, ROTATE]** *{new}*

- 1 The Sept. 11 terrorism attacks
- OR –
- 2 Normal ups and downs of the economy
- 9 Don't know/Refused

**[NO Q.15]**

- Q.16 I'd like to ask you some questions about priorities for President Bush and Congress this year. As I read from a list, tell me if you think the item that I read should be a priority. (First,) should **[INSERT ITEM; ROTATE; OBSERVE FORM DIFFERENCES]** be a top priority, important but lower priority, not too important, or should it not be done? What about... **[INSERT ITEM]?**  
*{1-01 unless marked}*

**[ASK ITEMS a THRU i OF FORM 1 ONLY:]**

- a.F1 Improving the job situation
- b.F1 Regulating health maintenance organizations (HMOs) and managed health care plans *{Early 9-01}*
- c.F1 Reducing crime
- d.F1 Reducing the budget deficit *{1-97}*
- e.F1 Reducing federal income taxes for the middle class
- f.F1 Reforming the campaign finance system *{Early 9-01}*
- g.F1 Developing a national missile defense system to protect against missile attacks

**[No item h]**

- i.F1 Adding prescription drug benefits to Medicare coverage *{Early 9-01}*
- j.F1 Protecting the environment
- k.F1 Defending the country from future terrorist attacks *{new}*
- l.F1 Taking steps to stimulate the economy *{new}*

**[ASK ITEMS m THRU x OF FORM 2 ONLY:]**

- m.F2 Improving the educational system *{Early 9-01}*
- n.F2 Taking steps to make the Social Security system financially sound *{Early 9-01}*
- o.F2 Taking steps to make the Medicare system financially sound

**[No item p]**

- q.F2 Dealing with the problems of poor and needy people
- r.F2 Dealing with the moral breakdown in the country
- s.F2 Strengthening the U.S. military
- t.F2 Dealing with global trade issues
- u.F2 Strengthening the nation's economy *{new}*
- v.F2 Providing health insurance to the uninsured
- w.F2 Waging the military campaign to destroy terrorist groups around the world *{new}*
- x.F2 Dealing with the nation's energy problem *{new}*

**[RESPONSE CATEGORIES:]**

- 1 Top priority
- 2 Important but lower priority
- 3 Not too important
- 4 Should not be done
- 9 Don't know/Refused (**VOL.**)

**[ASK ALL:]**

On a different question...

Q.17 Now thinking about President Bush's upcoming State of the Union address... Do you consider this year's State of the Union to be MORE important than past years', LESS important, or about as important as past years'? {1-00 mod., Clinton}

- 1 More important
- 2 Less important
- 3 Same
- 9 Don't know/Refused

**ASK FORM 1 ONLY:**

Q.18F1 Right now, which is more important for President Bush to focus on... domestic policy or foreign policy? {9-98}

- 1 Domestic policy
- 2 Foreign policy
- 3 Neither (VOL)
- 4 Both (VOL)
- 9 Don't Know

**ASK FORM 2 ONLY:**

Q.19F2 Right now, which is more important for President Bush to focus on... domestic policy or the war on terrorism? {9-98 mod.}

- 1 Domestic policy
- 2 War on terrorism
- 3 Neither (VOL)
- 4 Both (VOL)
- 9 Don't Know

**[ASK ALL:]**

Q.20 This coming year, do you think Republicans and Democrats in Washington will work together more to solve problems OR do you think they will bicker and oppose one another more than usual? {1-01}

- 1 Work together
- 2 Bicker and oppose one another more than usual
- 3 Same as in the past (VOL.)
- 9 Don't know/Refused (VOL.)

**[IF “2” IN Q.20, ASK:]**

Q.20a Who do you think is more to blame for this... Republicans or Democrats? {10-98 mod.; asked of a different question}

- 1 Republicans
- 2 Democrats
- 3 Both (VOL)
- 4 Neither (VOL)
- 9 Don't Know/Refused

Q.21 When it comes to national policy, who do you think George W. Bush is listening to more...

**[READ, ROTATE]** {1-01}

- 1 Conservative members of his party
- OR--
- 2 Moderate members of his party
- 9 **[DO NOT READ]** Don=t know/Refused (VOL.)

Q.22 As I read a list of issues, please tell me which party you think has the best ideas. (First), on the issue of **[READ AND ROTATE]** who has the best ideas... the Republican Party or the Democratic Party? **[REPEAT FOR NEXT ITEM:]** And who has the best ideas on... {1-01, 1-99}

**ASK FORM 1 ONLY:**

- a. Taking steps to make the Social Security system financially sound
- b. Cutting taxes for the middle class
- c. Improving the educational system
- d. Dealing with the economy {new}
- e. Dealing with the terrorist threat at home {new}

**ASK FORM 2 ONLY:**

- f. Regulating health maintenance organizations (HMOs) and managed health care plans
- g. Providing prescription drug benefits to senior citizens on Medicare
- h. Dealing with the global economy
- i. Improving morality in this country
- j. Dealing with the military efforts to destroy terrorist groups overseas {new}

**[RESPONSE CATEGORIES:]**

- 1 Republican Party
- 2 Democratic Party
- 3 Neither (VOL.)
- 9 Don=t know/Refused (VOL.)

**[ASK ALL]:**

Q.23 Who do YOU now think of as the leader of the Democratic Party... **(READ AND ROTATE)**? {4-01}

- 1 Bill Clinton
- 2 Al Gore
- 3 Joseph Lieberman
- 4 Dick Gephardt [OR]
- 5 Tom Daschle
- 6 Other **(VOL)**
- 7 Nobody is **(VOL)**
- 9 Don't know/Refused

**[NO Q.24]**

Now a few questions about the war on terrorism...

Q.25 How well is the MILITARY effort to destroy the terrorist groups going? **[READ]** {11-01}

- 1 Very well
- 2 Fairly well
- 3 Not too well
- 4 Not at all well
- 9 **[DO NOT READ]** Don't know/Refused **(VOL.)**

Q.26 How would you rate the job the government is doing in BUILDING DEFENSES at home to prevent future terrorist attacks? Would you say the government is doing an excellent job, a good job, only a fair job, or a poor job? {11-01}

- 1 Excellent
- 2 Good
- 3 Only fair
- 4 Poor
- 9 Don't know/Refused **(VOL.)**

Q.27 If you had to choose, what should get a higher priority now? **[READ AND ROTATE]** {11-01}

- 1 Building our defenses at home to prevent future terrorist attacks
- OR--
- 2 Taking military action to destroy terrorist networks around the world
- 3 **[DO NOT READ]** Both **(VOL.)**
- 9 **[DO NOT READ]** Don't know/Refused **(VOL.)**

**[NO Q.28]**

Q.29 If Osama bin Laden is captured or killed, do you think that the terrorism threat will be mostly over or do you think we will have to take further military actions to reduce the threat of terrorism to the United States? *{new}*

- 1 Mostly over
- 2 Take further military actions
- 9 Don't Know/Refused (**VOL.**)

**[ASK FORM 1 ONLY]:**

Q.30F1 As part of the U.S. war on terrorism, would you favor or oppose taking military action in Iraq to end Saddam Hussein's rule? *{new}*

- 1 Favor
- 2 Oppose
- 9 Don't know/Refused (**VOL.**)

**[ASK FORM 2 ONLY]:**

Q.31F2 As part of the U.S. war on terrorism, would you favor or oppose taking military action in Iraq to end Saddam Hussein's rule, even if it meant that U.S. forces might suffer thousands of casualties? *{new}*

- 1 Favor
- 2 Oppose
- 9 Don't know/Refused (**VOL.**)

**[ASK ALL]:**

Q.32 Here are some reasons given for using military force against Iraq. As I read a reason, tell me if it is a very important, fairly important, or not important reason to justify the use of military force against Iraq. First, (**READ ITEM**), would that be a very important reason, fairly important reason, or not important reason to justify the use of military force against Iraq? *{new}*

- a. If we learned that Iraq is developing nuclear weapons or weapons of mass destruction
- b. If we learned that Iraq helped the terrorists attack the United States on September 11<sup>th</sup>
- c. If we learned that Iraq was harboring other terrorists

**[RESPONSE CATEGORIES:]**

- 1 Very important
- 2 Fairly important
- 3 Not important
- 9 Don't know/Refused (**VOL.**)

**[NO Q.33]**

C.1 What do you think the U.S. should do to try to get Saddam Hussein to accept weapons inspections? Should we offer to remove economic sanctions against Iraq, or should we threaten him with a military attack? *{new}*

- 1 Offer to remove sanctions
- 2 Threaten military attack
- 3 Both (**VOL**)
- 4 Neither (**VOL**)
- 9 Don't Know

**[IF "1" IN C.1, ASK:]**

C.2 If Saddam Hussein will not accept weapons inspections in exchange for lifting economic sanctions, would you favor or oppose using military force against Iraq? *{new}*

- 1 Favor
- 2 Oppose
- 9 Don't Know/Refused

**[IF FAVOR ATTACK ("2" IN C.1 OR "1" IN C.2), ASK:]**

C.3 In that case, should we attack Iraq only if our major allies agree to join us, or attack Iraq even if allies do not want to join us? *{new}*

- 1 Attack only if allies agree
- 2 Attack even if allies won't join
- 9 Don't Know/Refused

**[ASK FORM 1 ONLY:]**

Q.34aF1 Would you favor or oppose the U.S. taking military action to destroy terrorist groups in Somalia? *{new}*

- 1 Favor
- 2 Oppose
- 9 Don't Know/Refused

**[ASK FORM 2 ONLY:]**

Q.34bF2 Would you favor or oppose the U.S. taking military action to destroy terrorist groups in Sudan? *{new}*

- 1 Favor
- 2 Oppose
- 9 Don't Know/Refused

**[ASK ALL:]**

Q.34c Would you favor or oppose the U.S. providing military aid to the Philippines and Indonesia to combat terrorist groups in those countries? *{new}*

- 1 Favor
- 2 Oppose
- 9 Don't Know/Refused

**[ASK FORM 1 ONLY:]**

Q.34dF1 These days, are you more sympathetic or less sympathetic to Russia in its war against Islamic rebels in Chechnya, or hasn't your opinion about this changed? *{new}*

- 1 More Sympathetic
- 2 Less Sympathetic
- 3 No change
- 9 Don't Know/Refused

**[ASK FORM 2 ONLY:]**

Q.34eF2 These days, are you more sympathetic or less sympathetic to China in its efforts to combat Islamic rebels in western China, or hasn't your opinion about this changed? *{new}*

- 1 More Sympathetic
- 2 Less Sympathetic
- 3 No change
- 9 Don't Know/Refused

**[ASK ALL:]**

Q.35 Do you think the United States should keep military forces in Afghanistan in order to maintain civil order there, or should the United States not do this? *{new}*

- 1 Yes, keep forces in Afghanistan
- 2 No
- 9 Don't Know/Refused **(VOL.)**

On another subject...

Q.36 In order to curb terrorism in this country, do you think it will be necessary for the average person to give up some civil liberties, or not? *{9-01}*

- 1 Yes, it will be necessary
- 2 No, it will not be necessary
- 9 Don't Know/Refused **(VOL.)**



Q.37 What concerns you more right now? That the government will fail to enact strong, new anti-terrorism laws, or that the government will enact new anti-terrorism laws which excessively restrict the average person's civil liberties? {9-01}

- 1 Fail to enact strong laws
- 2 Enact laws that restrict civil liberties
- 3 Neither (**VOL**)
- 9 Don't Know/Refused (**VOL.**)

Q.38 From what you've seen or heard in the news, do you approve or disapprove of the Bush Administration's plan to put non-U.S. (United States) citizens charged with terrorism on trial in special military tribunals rather than in the regular criminal court system?  
{*Newsweek 11/29-30, 2001*}

- 1 Approve
- 2 Disapprove
- 9 Don't Know/Refused (**VOL.**)

**[ASK FORM 1 ONLY]:**

Q.39F1 How worried are you that there will soon be another terrorist attack in the United States? [**READ**]  
{10/21}

- 1 Very worried
- 2 Somewhat worried
- 3 Not too worried
- 4 Not at all worried
- 9 Don't know/Refused (**VOL.**)

**[ASK FORM 2 ONLY]:**

Q.40F2 All in all, how worried are you that you or someone in your family might become a victim of a terrorist attack? Would you say you are [**READ**] {11/7}

- 1 Very worried
- 2 Somewhat worried
- 3 Not too worried
- 4 Not at all worried
- 5 [**DO NOT READ**] Already victim (**VOL.**)
- 9 [**DO NOT READ**] Don't know/Refused (**VOL.**)

**[ASK ALL]:**

Q.41 Thinking about the Mideast situation these days, do you think the U.S. should take Israel's side more, less or about as much as it has in the past? {Oct 15-21, 2001}

- 1 More
- 2 Less
- 3 As much as in the past
- 9 Don't know/Refused (VOL.)

[NO Q.42 – Q.44]

Q.45 As I read from a list tell me how important each of the following is as a way to reduce terrorism in the future. (First), [READ AND ROTATE] is this very important, fairly important, not too important, or not at all important as a way to reduce terrorism in the future? {new}

[ASK FORM 1 ONLY:]

- a. Decrease American dependence on oil imported from the Middle East
- b. Encourage more democracy in Mideast countries like Egypt and Saudi Arabia
- c. Take military action to wipe out facilities of countries attempting to build nuclear weapons
- d. Increase foreign aid to countries that help the U.S. combat terrorism

[ASK FORM 2 ONLY:]

- e. Purchase and destroy nuclear wastes and weapons in former Soviet Republics
- f. Increase defense spending to maintain our military preparedness
- g. Attempt to reduce poverty with foreign aid as a way of combating terrorism in poor Mideast countries
- h. Increase military aid to countries that help the U.S. combat terrorism

[RESPONSE CATEGORIES:]

- 1 Very Important
- 2 Fairly Important
- 3 Not too Important
- 4 Not at all Important
- 9 Don't Know/Refused (VOL.)

Now, just a few questions for statistical purposes only.

Q.46 Do you use a computer at your workplace, at school, at home or anywhere else on at least an occasional basis? {11-01}

- 1 Yes
- 2 No — GO TO D.1
- 9 Don't know/Refused — [VOL.]; GO TO D.1

**IF “1, YES” (USE A COMPUTER) IN Q.46, ASK:**

Q.47 Do you ever go online to access the Internet or World Wide Web or to send and receive email?  
{11-01}

- 1 Yes
- 2 No
- 9 Don't know — **[VOL.]**

D.1 [ENTER RESPONDENT'S SEX:]

- 1 Male
- 2 Female

D.2 What is your age?

- \_\_\_\_\_ years
- 97 97 or older
  - 99 Don't know/Refused **[VOL.]**

D.3 What is the last grade or class that you completed in school? **[DO NOT READ]**

- 1 None, or grade 1-8
- 2 High school incomplete (Grades 9-11)
- 3 High school graduate (Grade 12 or GED certificate)
- 4 Business, Technical, or vocational school AFTER high school
- 5 Some college, no 4-year degree
- 6 College graduate (B.S., B.A., or other 4-year degree)
- 7 Post-graduate training or professional schooling after college (e.g., toward a master's Degree or Ph.D.; law or medical school)
- 9 Don't know/Refused **(VOL.)**

D.4 Are you, yourself, of Hispanic origin or descent, such as Mexican, Puerto Rican, Cuban, or some other Spanish background?

- 1 Yes — **SEE INSTRUCTION**
- 2 No — **GO TO D.5**
- 9 Don't know/Refused **(VOL.) — GO TO D.5**

**[INTERVIEWER: IF RESPONDENT ANSWERED 1 'HISPANIC' IN D.4, ASK: Are you white Hispanic, black Hispanic, or some other race? IF NON-HISPANIC ASK:]**

D.5 What is your race? Are you white, black, Asian, or some other?

- 1 White
- 2 Black
- 3 Asian
- 4 Other or mixed race
- 9 Don't know/Refused (VOL.)

D.6 Are you married, divorced, separated, widowed, or never been married?

- 1 Married
- 2 Divorced
- 3 Separated
- 4 Widowed
- 5 Never been married
- 9 Don't know/Refused (VOL.)

D.7 Are you the parent or guardian of any children under 18 now living in your household?

- 1 Yes
- 2 No
- 9 Don't know/Refused (VOL.)

D.8 What is your religious preference — Protestant, Roman Catholic, Jewish, Mormon, or an orthodox church such as the Greek or Russian Orthodox Church?

- 1 Protestant (include Baptist, Episcopal, Jehovah's Witness, Lutheran, Methodist, Presbyterian, Episcopalian, Pentecostal, Church of Christ, etc.)
- 2 Roman Catholic
- 3 Jewish — **GO TO D.10**
- 4 Mormon (include Church of Jesus Christ of Latter Day Saints)
- 5 Orthodox Church (Greek or Russian)
- 6 Islam/Muslim — **GO TO D.10**
- 7 Other religion [**SPECIFY**]
- 8 No religion, not a believer, atheist, agnostic — **GO TO D.10**
- 9 Don't know/Refused [**VOL.**]

D.9 Would you describe yourself as a "born again" or evangelical Christian, or not?

- 1 Yes, would
- 2 No, would not
- 9 Don't know/Refused (VOL.)

**[ASK ALL:]**

D.10 Last year, that is in 2001, what was your total family income from all sources, before taxes? Just stop me when I get to the right category. **[READ]**

- 1 Less than \$10,000
- 2 \$10,000 to under \$20,000
- 3 \$20,000 to under \$30,000
- 4 \$30,000 to under \$40,000
- 5 \$40,000 to under \$50,000
- 6 \$50,000 to under \$75,000
- 7 \$75,000 to under \$100,000
- 8 \$100,000 or more
- 9 **[DO NOT READ]** Don't know/Refused **(VOL.)**

D.11 These days, many people are so busy they can't find time to register to vote, or move around so often they don't get a chance to re-register... Are you NOW registered to vote in your precinct or election district, or haven't you been able to register so far?

- 1 Yes, registered
- 2 No, not registered -- **GO TO D.12**
- 9 Don't know/Refused **(VOL.)** -- **GO TO D.12**

**[IF D.11 = 1 "YES" ASK:]**

D.11a Are you absolutely certain you are registered to vote, or is there a chance your registration has lapsed because you moved or for some other reason?

- 1 Absolutely certain
- 2 Chance registration has lapsed
- 9 Don't know/Refused **(VOL.)**

**[ASK ALL:]**

D.12 In politics today, do you consider yourself a Republican, Democrat or Independent?

- 1 Republican - **GO TO D.13**
- 2 Democrat - **GO TO D.13**
- 3 Independent
- 4 No Preference **(VOL.)**
- 5 Other **(VOL.)**
- 9 Don't know/Refused **(VOL.)**

**[IF ANSWERED 3, 4, 5 OR 9 IN D.12, ASK:]**

D.12a As of today do you lean more to the Republican Party or more to the Democratic Party?

- 1 Republican
- 2 Democrat
- 9 Other/Don't know/Refused **(VOL.)**

**[ASK ALL:]**

D.13 In the 2000 presidential election, did things come up which kept you from voting, or did you happen to vote? **[IF VOTED, ASK:]** Did you vote for Gore, Bush, Nader or Buchanan?

- 1 Yes, Gore
- 2 Yes, Bush
- 3 Yes, Nader
- 4 Yes, Buchanan
- 5 Yes, other candidate (VOL.)
- 6 Yes, don't remember which candidate (VOL.)
- 7 No, didn't vote/Too young (VOL.)
- 8 Don't remember if voted (VOL.)
- 9 Refused (VOL.)

D.14 In general, would you describe your political views as... **[READ]**

- 1 Very conservative
- 2 Conservative
- 3 Moderate
- 4 Liberal, OR
- 5 Very liberal?
- 9 **[DO NOT READ]** Don't know/Refused (VOL.)

D.15 Do you own or rent your home?

- 1 Own
- 2 Rent
- 3 **[DO NOT READ]** Other arrangement (VOL.)
- 9 **[DO NOT READ]** Don't know/Refused (VOL.)

D.16 Are you now employed full-time, part-time or not employed?

- 1 Full-time
- 2 Part-time
- 3 Not employed
- 9 Don't know/Refused (VOL.)

**[IF MARRIED (D.6=1) ASK:]**

D.17 Is your spouse now employed full-time, part-time or not employed?

- 1 Full-time
- 2 Part-time
- 3 Not employed
- 9 Don't know/Refused (VOL.)

**[INCLUDE "Your spouse" FOR MARRIED PEOPLE ONLY (D.6=1)]**

D.18 Are you (or is your spouse) a member of a labor union?

- 1 Yes, respondent is
- 2 Yes, spouse is
- 3 Yes, both
- 4 No, Neither are
- 9 Don't know/Refused (**VOL.**)

D.19 Which of the following BEST describes the place where you now live?...**[READ]**

- 1 A large city
- 2 A suburb near a large city
- 3 A small city or town
- 4 OR a rural area
- 9 **[DO NOT READ]** Don't know/Refused (**VOL.**)

D.20 CHECK THE DAY OF WEEK INTERVIEW WAS COMPLETED

1 Mon 2 Tues 3 Wed 4 Thurs 5 Fri 6 Sat 7 Sun

D.21 CIRCLE NUMBER OF CALL ON WHICH THIS INTERVIEW WAS COMPLETED

1 2 3 4

END OF INTERVIEW. **THANK RESPONDENT:** Thank you very much for your time. Have a nice day/evening.

I HEREBY ATTEST THAT THIS IS A TRUE AND HONEST INTERVIEW.

Region Codes

- 1) East
- 2) Midwest
- 3) South
- 4) West

| SINGLE COL | COL & | FREQUENCIES | FOR  | USPEW2002-01NII | (COLS. 1-200 ) | /   | NCARDS | 1201 |     |     |     |      |       |       |         |     |  |
|------------|-------|-------------|------|-----------------|----------------|-----|--------|------|-----|-----|-----|------|-------|-------|---------|-----|--|
| COL        |       | -           | 0    | 1               | 2              | 3   | 4      | 5    | 6   | 7   | 8   | 9    | BLANK | OTHER | NONBLNK | COL |  |
| 1          | 0     | 0           | 0    | 0               | 0              | 0   | 0      | 0    | 0   | 0   | 0   | 0    | 1201  | 0     | 0       | 1   |  |
| 2          | 0     | 0           | 0    | 0               | 0              | 0   | 0      | 0    | 0   | 0   | 0   | 0    | 1201  | 0     | 0       | 2   |  |
| 3          | 0     | 0           | 0    | 0               | 0              | 0   | 0      | 0    | 0   | 0   | 0   | 0    | 1201  | 0     | 0       | 3   |  |
| 4          | 0     | 0           | 0    | 0               | 0              | 0   | 0      | 0    | 0   | 0   | 0   | 0    | 1201  | 0     | 0       | 4   |  |
| 5          | 0     | 0           | 0    | 0               | 432            | 0   | 0      | 0    | 0   | 0   | 0   | 0    | 769   | 0     | 432     | 5   |  |
| 6          | 0     | 0           | 71   | 147             | 160            | 144 | 143    | 146  | 81  | 75  | 79  | 80   | 75    | 0     | 1126    | 6   |  |
| 7          | 0     | 0           | 133  | 113             | 116            | 120 | 120    | 113  | 117 | 119 | 126 | 118  | 6     | 0     | 1195    | 7   |  |
| 8          | 0     | 0           | 118  | 118             | 121            | 113 | 129    | 122  | 117 | 117 | 128 | 118  | 0     | 0     | 1201    | 8   |  |
| 9          | 0     | 0           | 0    | 1201            | 0              | 0   | 0      | 0    | 0   | 0   | 0   | 0    | 0     | 0     | 1201    | 9   |  |
| 10         | 0     | 0           | 0    | 0               | 0              | 0   | 0      | 0    | 0   | 0   | 0   | 1201 | 0     | 0     | 1201    | 10  |  |
| 11         | 0     | 0           | 0    | 0               | 0              | 0   | 0      | 1201 | 0   | 0   | 0   | 0    | 0     | 0     | 1201    | 11  |  |
| 12         | 0     | 0           | 0    | 0               | 0              | 0   | 1201   | 0    | 0   | 0   | 0   | 0    | 0     | 0     | 1201    | 12  |  |
| 13         | 0     | 0           | 0    | 0               | 0              | 0   | 0      | 1201 | 0   | 0   | 0   | 0    | 0     | 0     | 1201    | 13  |  |
| 14         | 0     | 0           | 0    | 645             | 300            | 72  | 184    | 0    | 0   | 0   | 0   | 0    | 0     | 0     | 1201    | 14  |  |
| 15         | 0     | 0           | 1201 | 0               | 0              | 0   | 0      | 0    | 0   | 0   | 0   | 0    | 0     | 0     | 1201    | 15  |  |
| 16         | 0     | 0           | 0    | 0               | 1201           | 0   | 0      | 0    | 0   | 0   | 0   | 0    | 0     | 0     | 1201    | 16  |  |
| 17         | 0     | 0           | 1201 | 0               | 0              | 0   | 0      | 0    | 0   | 0   | 0   | 0    | 0     | 0     | 1201    | 17  |  |
| 18         | 0     | 0           | 0    | 1201            | 0              | 0   | 0      | 0    | 0   | 0   | 0   | 0    | 0     | 0     | 1201    | 18  |  |
| 19         | 0     | 0           | 376  | 825             | 0              | 0   | 0      | 0    | 0   | 0   | 0   | 0    | 0     | 0     | 1201    | 19  |  |
| 20         | 0     | 0           | 364  | 304             | 106            | 51  | 0      | 0    | 0   | 0   | 0   | 376  | 0     | 0     | 1201    | 20  |  |
| 21         | 0     | 0           | 0    | 0               | 0              | 0   | 0      | 0    | 0   | 0   | 0   | 0    | 1201  | 0     | 0       | 21  |  |
| 22         | 0     | 0           | 0    | 0               | 0              | 0   | 0      | 0    | 0   | 0   | 0   | 0    | 1201  | 0     | 0       | 22  |  |
| 23         | 0     | 0           | 0    | 581             | 620            | 0   | 0      | 0    | 0   | 0   | 0   | 0    | 0     | 0     | 1201    | 23  |  |
| 24         | 0     | 0           | 207  | 191             | 160            | 63  | 0      | 0    | 16  | 119 | 215 | 230  | 0     | 0     | 1201    | 24  |  |
| 25         | 0     | 0           | 178  | 190             | 231            | 186 | 201    | 215  | 0   | 0   | 0   | 0    | 0     | 0     | 1201    | 25  |  |
| 26         | 0     | 0           | 133  | 137             | 120            | 138 | 122    | 90   | 122 | 102 | 126 | 111  | 0     | 0     | 1201    | 26  |  |
| 27         | 0     | 0           | 191  | 176             | 200            | 224 | 206    | 204  | 0   | 0   | 0   | 0    | 0     | 0     | 1201    | 27  |  |
| 28         | 0     | 0           | 136  | 131             | 121            | 129 | 87     | 124  | 98  | 115 | 123 | 137  | 0     | 0     | 1201    | 28  |  |
| 29         | 0     | 0           | 0    | 0               | 0              | 0   | 0      | 0    | 0   | 0   | 0   | 0    | 1201  | 0     | 0       | 29  |  |
| 30         | 0     | 0           | 0    | 0               | 0              | 0   | 0      | 0    | 0   | 0   | 0   | 0    | 1201  | 0     | 0       | 30  |  |
| 31         | 0     | 0           | 0    | 772             | 429            | 0   | 0      | 0    | 0   | 0   | 0   | 0    | 0     | 0     | 1201    | 31  |  |
| 32         | 0     | 0           | 303  | 125             | 1              | 2   | 5      | 10   | 26  | 172 | 243 | 314  | 0     | 0     | 1201    | 32  |  |
| 33         | 0     | 0           | 178  | 190             | 231            | 186 | 201    | 215  | 0   | 0   | 0   | 0    | 0     | 0     | 1201    | 33  |  |
| 34         | 0     | 0           | 133  | 137             | 120            | 138 | 122    | 90   | 122 | 102 | 126 | 111  | 0     | 0     | 1201    | 34  |  |
| 35         | 0     | 0           | 191  | 176             | 200            | 224 | 206    | 204  | 0   | 0   | 0   | 0    | 0     | 0     | 1201    | 35  |  |
| 36         | 0     | 0           | 136  | 131             | 121            | 129 | 87     | 124  | 98  | 115 | 123 | 137  | 0     | 0     | 1201    | 36  |  |
| 37         | 0     | 0           | 0    | 0               | 0              | 0   | 0      | 0    | 0   | 0   | 0   | 0    | 1201  | 0     | 0       | 37  |  |
| 38         | 0     | 0           | 0    | 0               | 0              | 0   | 0      | 0    | 0   | 0   | 0   | 0    | 1201  | 0     | 0       | 38  |  |
| 39         | 0     | 0           | 0    | 584             | 284            | 168 | 77     | 44   | 22  | 15  | 2   | 4    | 0     | 1     | 1201    | 39  |  |
| 40         | 0     | 0           | 0    | 51              | 0              | 0   | 376    | 364  | 304 | 106 | 0   | 0    | 0     | 0     | 1201    | 40  |  |
| 41         | 0     | 0           | 1201 | 0               | 0              | 0   | 0      | 0    | 0   | 0   | 0   | 0    | 0     | 0     | 1201    | 41  |  |
| 42         | 0     | 0           | 0    | 0               | 1201           | 0   | 0      | 0    | 0   | 0   | 0   | 0    | 0     | 0     | 1201    | 42  |  |
| 43         | 0     | 0           | 1201 | 0               | 0              | 0   | 0      | 0    | 0   | 0   | 0   | 0    | 0     | 0     | 1201    | 43  |  |
| 44         | 0     | 0           | 0    | 1201            | 0              | 0   | 0      | 0    | 0   | 0   | 0   | 0    | 0     | 0     | 1201    | 44  |  |
| 45         | 0     | 0           | 291  | 910             | 0              | 0   | 0      | 0    | 0   | 0   | 0   | 0    | 0     | 0     | 1201    | 45  |  |
| 46         | 0     | 0           | 344  | 384             | 118            | 64  | 0      | 0    | 0   | 0   | 0   | 291  | 0     | 0     | 1201    | 46  |  |
| 47         | 0     | 0           | 0    | 0               | 0              | 0   | 0      | 0    | 0   | 0   | 0   | 0    | 1201  | 0     | 0       | 47  |  |
| 48         | 0     | 0           | 0    | 0               | 0              | 0   | 0      | 0    | 0   | 0   | 0   | 0    | 1201  | 0     | 0       | 48  |  |
| 49         | 0     | 0           | 0    | 634             | 567            | 0   | 0      | 0    | 0   | 0   | 0   | 0    | 0     | 0     | 1201    | 49  |  |
| 50         | 0     | 0           | 199  | 175             | 209            | 53  | 0      | 0    | 21  | 117 | 212 | 215  | 0     | 0     | 1201    | 50  |  |
| 51         | 0     | 0           | 168  | 181             | 229            | 179 | 243    | 201  | 0   | 0   | 0   | 0    | 0     | 0     | 1201    | 51  |  |
| 52         | 0     | 0           | 128  | 131             | 122            | 136 | 121    | 90   | 126 | 112 | 129 | 106  | 0     | 0     | 1201    | 52  |  |
| 53         | 0     | 0           | 201  | 167             | 199            | 219 | 215    | 200  | 0   | 0   | 0   | 0    | 0     | 0     | 1201    | 53  |  |
| 54         | 0     | 0           | 130  | 130             | 123            | 130 | 85     | 124  | 103 | 116 | 129 | 131  | 0     | 0     | 1201    | 54  |  |
| 55         | 0     | 0           | 0    | 0               | 0              | 0   | 0      | 0    | 0   | 0   | 0   | 0    | 1201  | 0     | 0       | 55  |  |
| 56         | 0     | 0           | 0    | 0               | 0              | 0   | 0      | 0    | 0   | 0   | 0   | 0    | 1201  | 0     | 0       | 56  |  |
| 57         | 0     | 0           | 0    | 800             | 387            | 0   | 0      | 0    | 0   | 0   | 0   | 14   | 0     | 0     | 1201    | 57  |  |
| 58         | 0     | 0           | 283  | 121             | 37             | 3   | 21     | 12   | 31  | 166 | 237 | 290  | 0     | 0     | 1201    | 58  |  |
| 59         | 0     | 0           | 168  | 181             | 229            | 179 | 229    | 203  | 3   | 3   | 4   | 2    | 0     | 0     | 1201    | 59  |  |
| 60         | 0     | 0           | 130  | 134             | 123            | 139 | 124    | 90   | 123 | 109 | 125 | 104  | 0     | 0     | 1201    | 60  |  |
| 61         | 0     | 0           | 199  | 164             | 199            | 218 | 213    | 200  | 4   | 1   | 1   | 2    | 0     | 0     | 1201    | 61  |  |
| 62         | 0     | 0           | 130  | 130             | 122            | 128 | 84     | 122  | 99  | 115 | 128 | 129  | 14    | 0     | 1187    | 62  |  |
| 63         | 0     | 0           | 0    | 0               | 0              | 0   | 0      | 0    | 0   | 0   | 0   | 0    | 1201  | 0     | 0       | 63  |  |
| 64         | 0     | 0           | 0    | 0               | 0              | 0   | 0      | 0    | 0   | 0   | 0   | 0    | 1201  | 0     | 0       | 64  |  |
| 65         | 0     | 0           | 0    | 508             | 321            | 174 | 96     | 48   | 27  | 16  | 4   | 4    | 0     | 3     | 1201    | 65  |  |
| 66         | 0     | 0           | 0    | 64              | 0              | 0   | 291    | 344  | 384 | 118 | 0   | 0    | 0     | 0     | 1201    | 66  |  |
| 67         | 0     | 0           | 1201 | 0               | 0              | 0   | 0      | 0    | 0   | 0   | 0   | 0    | 0     | 0     | 1201    | 67  |  |
| 68         | 0     | 0           | 0    | 0               | 1201           | 0   | 0      | 0    | 0   | 0   | 0   | 0    | 0     | 0     | 1201    | 68  |  |
| 69         | 0     | 0           | 1201 | 0               | 0              | 0   | 0      | 0    | 0   | 0   | 0   | 0    | 0     | 0     | 1201    | 69  |  |
| 70         | 0     | 0           | 0    | 1201            | 0              | 0   | 0      | 0    | 0   | 0   | 0   | 0    | 0     | 0     | 1201    | 70  |  |
| 71         | 0     | 0           | 291  | 910             | 0              | 0   | 0      | 0    | 0   | 0   | 0   | 0    | 0     | 0     | 1201    | 71  |  |
| 72         | 0     | 0           | 344  | 384             | 118            | 64  | 0      | 0    | 0   | 0   | 0   | 291  | 0     | 0     | 1201    | 72  |  |
| 73         | 0     | 0           | 0    | 576             | 625            | 0   | 0      | 0    | 0   | 0   | 0   | 0    | 0     | 0     | 1201    | 73  |  |
| 74         | 0     | 0           | 0    | 0               | 0              | 0   | 0      | 0    | 0   | 0   | 0   | 0    | 1201  | 0     | 0       | 74  |  |
| 75         | 0     | 0           | 0    | 0               | 0              | 0   | 0      | 0    | 0   | 0   | 0   | 0    | 1201  | 0     | 0       | 75  |  |
| 76         | 0     | 0           | 0    | 1201            | 0              | 0   | 0      | 0    | 0   | 0   | 0   | 0    | 0     | 0     | 1201    | 76  |  |
| 77         | 0     | 0           | 0    | 0               | 0              | 0   | 0      | 0    | 0   | 0   | 0   | 0    | 0     | 1201  | 1201    | 77  |  |
| 78         | 0     | 0           | 0    | 0               | 0              | 0   | 0      | 0    | 0   | 0   | 0   | 0    | 0     | 1201  | 1201    | 78  |  |
| 79         | 0     | 0           | 0    | 0               | 0              | 0   | 0      | 0    | 0   | 0   | 0   | 0    | 0     | 1201  | 1201    | 79  |  |
| 80         | 0     | 0           | 0    | 0               | 0              | 0   | 0      | 0    | 0   | 0   | 0   | 0    | 1201  | 0     | 0       | 80  |  |
| 81         | 0     | 0           | 0    | 0               | 0              | 0   | 0      | 0    | 0   | 0   | 0   | 0    | 0     | 1201  | 1201    | 81  |  |



| SINGLE COL | COL & | FREQUENCIES - | FOR 0 | USPEW2002-01NII 1 | 2    | (COLS. 1-200 ) 3 | 4   | 5   | / 6 | NCARDS 7 | 1201 8 | 9   | BLANK | OTHER | NONBLNK | COL |
|------------|-------|---------------|-------|-------------------|------|------------------|-----|-----|-----|----------|--------|-----|-------|-------|---------|-----|
| 82         | 0     | 0             | 0     | 0                 | 0    | 0                | 0   | 0   | 0   | 0        | 0      | 0   | 0     | 1201  | 1201    | 82  |
| 83         | 0     | 0             | 0     | 0                 | 0    | 0                | 0   | 0   | 0   | 0        | 0      | 0   | 0     | 1201  | 1201    | 83  |
| 84         | 0     | 0             | 0     | 0                 | 0    | 0                | 0   | 0   | 0   | 0        | 0      | 0   | 1201  | 0     | 0       | 84  |
| 85         | 0     | 0             | 0     | 551               | 0    | 0                | 0   | 0   | 0   | 0        | 0      | 0   | 650   | 0     | 551     | 85  |
| 86         | 0     | 0             | 448   | 103               | 0    | 0                | 0   | 0   | 0   | 0        | 0      | 650 | 0     | 0     | 1201    | 86  |
| 87         | 0     | 0             | 0     | 0                 | 0    | 0                | 0   | 0   | 0   | 0        | 0      | 0   | 1201  | 0     | 0       | 87  |
| 88         | 0     | 0             | 0     | 1201              | 0    | 0                | 0   | 0   | 0   | 0        | 0      | 0   | 0     | 0     | 1201    | 88  |
| 89         | 0     | 0             | 0     | 0                 | 0    | 0                | 33  | 448 | 0   | 650      | 0      | 70  | 0     | 0     | 1201    | 89  |
| 90         | 0     | 0             | 0     | 0                 | 0    | 0                | 0   | 0   | 0   | 0        | 0      | 0   | 0     | 1201  | 1201    | 90  |
| 91         | 0     | 0             | 0     | 650               | 0    | 0                | 70  | 481 | 0   | 0        | 0      | 0   | 0     | 0     | 1201    | 91  |
| 92         | 0     | 0             | 0     | 0                 | 518  | 683              | 0   | 0   | 0   | 0        | 0      | 0   | 0     | 0     | 1201    | 92  |
| 93         | 0     | 0             | 0     | 0                 | 0    | 0                | 0   | 0   | 0   | 0        | 0      | 0   | 1201  | 0     | 0       | 93  |
| 94         | 0     | 0             | 0     | 0                 | 1201 | 0                | 0   | 0   | 0   | 0        | 0      | 0   | 0     | 0     | 1201    | 94  |
| 95         | 0     | 0             | 1201  | 0                 | 0    | 0                | 0   | 0   | 0   | 0        | 0      | 0   | 0     | 0     | 1201    | 95  |
| 96         | 0     | 0             | 1201  | 0                 | 0    | 0                | 0   | 0   | 0   | 0        | 0      | 0   | 0     | 0     | 1201    | 96  |
| 97         | 0     | 0             | 0     | 0                 | 1201 | 0                | 0   | 0   | 0   | 0        | 0      | 0   | 0     | 0     | 1201    | 97  |
| 98         | 0     | 0             | 0     | 0                 | 0    | 0                | 0   | 0   | 0   | 0        | 0      | 0   | 1201  | 0     | 0       | 98  |
| 99         | 0     | 0             | 0     | 0                 | 0    | 0                | 0   | 0   | 0   | 0        | 0      | 0   | 1201  | 0     | 0       | 99  |
| 100        | 0     | 0             | 0     | 0                 | 0    | 0                | 0   | 0   | 0   | 0        | 0      | 0   | 1201  | 0     | 0       | 100 |
| 101        | 0     | 0             | 0     | 0                 | 0    | 0                | 0   | 0   | 0   | 0        | 0      | 0   | 1201  | 0     | 0       | 101 |
| 102        | 0     | 0             | 0     | 0                 | 0    | 0                | 0   | 0   | 0   | 0        | 0      | 0   | 1201  | 0     | 0       | 102 |
| 103        | 0     | 0             | 0     | 0                 | 0    | 0                | 0   | 0   | 0   | 0        | 0      | 0   | 1201  | 0     | 0       | 103 |
| 104        | 0     | 0             | 0     | 0                 | 0    | 0                | 0   | 0   | 0   | 0        | 0      | 0   | 1201  | 0     | 0       | 104 |
| 105        | 0     | 0             | 0     | 0                 | 0    | 0                | 0   | 0   | 0   | 0        | 0      | 0   | 1201  | 0     | 0       | 105 |
| 106        | 0     | 0             | 0     | 0                 | 0    | 0                | 0   | 0   | 0   | 0        | 0      | 0   | 1201  | 0     | 0       | 106 |
| 107        | 0     | 0             | 0     | 0                 | 0    | 0                | 0   | 0   | 0   | 0        | 0      | 0   | 0     | 1201  | 1201    | 107 |
| 108        | 0     | 0             | 0     | 0                 | 0    | 0                | 0   | 0   | 0   | 0        | 0      | 0   | 0     | 1201  | 1201    | 108 |
| 109        | 0     | 0             | 0     | 0                 | 0    | 0                | 0   | 0   | 0   | 0        | 0      | 0   | 0     | 1201  | 1201    | 109 |
| 110        | 0     | 0             | 0     | 0                 | 0    | 0                | 0   | 0   | 0   | 0        | 0      | 0   | 1201  | 0     | 0       | 110 |
| 111        | 0     | 0             | 0     | 0                 | 0    | 0                | 0   | 0   | 0   | 0        | 0      | 0   | 0     | 1201  | 1201    | 111 |
| 112        | 0     | 0             | 0     | 0                 | 0    | 0                | 0   | 0   | 0   | 0        | 0      | 0   | 0     | 1201  | 1201    | 112 |
| 113        | 0     | 0             | 0     | 0                 | 0    | 0                | 0   | 0   | 0   | 0        | 0      | 0   | 0     | 1201  | 1201    | 113 |
| 114        | 0     | 0             | 0     | 0                 | 0    | 0                | 0   | 0   | 0   | 0        | 0      | 0   | 1201  | 0     | 0       | 114 |
| 115        | 0     | 0             | 0     | 910               | 0    | 0                | 0   | 0   | 0   | 0        | 0      | 0   | 291   | 0     | 910     | 115 |
| 116        | 0     | 0             | 344   | 566               | 0    | 0                | 0   | 0   | 0   | 0        | 0      | 291 | 0     | 0     | 1201    | 116 |
| 117        | 0     | 0             | 0     | 0                 | 0    | 0                | 0   | 0   | 0   | 0        | 0      | 0   | 1201  | 0     | 0       | 117 |
| 118        | 0     | 0             | 0     | 1201              | 0    | 0                | 0   | 0   | 0   | 0        | 0      | 0   | 0     | 0     | 1201    | 118 |
| 119        | 0     | 0             | 1     | 0                 | 68   | 499              | 0   | 0   | 342 | 291      | 0      | 0   | 0     | 0     | 1201    | 119 |
| 120        | 0     | 0             | 0     | 0                 | 0    | 0                | 0   | 0   | 0   | 0        | 0      | 0   | 0     | 1201  | 1201    | 120 |
| 121        | 0     | 0             | 0     | 1                 | 858  | 0                | 0   | 342 | 0   | 0        | 0      | 0   | 0     | 0     | 1201    | 121 |
| 122        | 0     | 0             | 0     | 408               | 0    | 0                | 1   | 0   | 1   | 500      | 291    | 0   | 0     | 0     | 1201    | 122 |
| 123        | 0     | 0             | 0     | 0                 | 0    | 0                | 0   | 0   | 0   | 0        | 0      | 0   | 0     | 1201  | 1201    | 123 |
| 124        | 0     | 0             | 0     | 342               | 66   | 291              | 501 | 1   | 0   | 0        | 0      | 0   | 0     | 0     | 1201    | 124 |
| 125        | 0     | 0             | 0     | 0                 | 66   | 0                | 0   | 343 | 1   | 292      | 499    | 0   | 0     | 0     | 1201    | 125 |
| 126        | 0     | 0             | 0     | 0                 | 0    | 0                | 0   | 0   | 0   | 0        | 0      | 0   | 1201  | 0     | 0       | 126 |
| 127        | 0     | 0             | 0     | 0                 | 0    | 0                | 0   | 0   | 0   | 0        | 0      | 0   | 0     | 1201  | 1201    | 127 |
| 128        | 0     | 0             | 0     | 0                 | 0    | 0                | 0   | 0   | 0   | 0        | 0      | 0   | 0     | 1201  | 1201    | 128 |
| 129        | 0     | 0             | 0     | 0                 | 0    | 0                | 0   | 0   | 0   | 0        | 0      | 0   | 0     | 1201  | 1201    | 129 |
| 130        | 0     | 0             | 0     | 0                 | 0    | 0                | 0   | 0   | 0   | 0        | 0      | 0   | 1201  | 0     | 0       | 130 |
| 131        | 0     | 0             | 0     | 0                 | 1201 | 0                | 0   | 0   | 0   | 0        | 0      | 0   | 0     | 0     | 1201    | 131 |
| 132        | 0     | 0             | 1201  | 0                 | 0    | 0                | 0   | 0   | 0   | 0        | 0      | 0   | 0     | 0     | 1201    | 132 |
| 133        | 0     | 0             | 1201  | 0                 | 0    | 0                | 0   | 0   | 0   | 0        | 0      | 0   | 0     | 0     | 1201    | 133 |
| 134        | 0     | 0             | 0     | 0                 | 1201 | 0                | 0   | 0   | 0   | 0        | 0      | 0   | 0     | 0     | 1201    | 134 |
| 135        | 0     | 0             | 0     | 0                 | 0    | 0                | 0   | 0   | 0   | 0        | 0      | 0   | 1201  | 0     | 0       | 135 |
| 136        | 0     | 0             | 0     | 0                 | 0    | 0                | 0   | 0   | 0   | 0        | 0      | 0   | 1201  | 0     | 0       | 136 |
| 137        | 0     | 0             | 0     | 0                 | 0    | 0                | 0   | 0   | 0   | 0        | 0      | 0   | 1201  | 0     | 0       | 137 |
| 138        | 0     | 0             | 0     | 293               | 908  | 0                | 0   | 0   | 0   | 0        | 0      | 0   | 0     | 0     | 1201    | 138 |
| 139        | 0     | 0             | 0     | 0                 | 291  | 1                | 342 | 0   | 2   | 66       | 499    | 0   | 0     | 0     | 1201    | 139 |
| 140        | 0     | 0             | 0     | 1098              | 103  | 0                | 0   | 0   | 0   | 0        | 0      | 0   | 0     | 0     | 1201    | 140 |
| 141        | 0     | 0             | 196   | 175               | 124  | 144              | 114 | 110 | 98  | 121      | 113    | 6   | 0     | 0     | 1201    | 141 |
| 142        | 0     | 0             | 127   | 131               | 127  | 113              | 109 | 143 | 113 | 120      | 99     | 119 | 0     | 0     | 1201    | 142 |
| 143        | 0     | 0             | 118   | 123               | 119  | 122              | 127 | 107 | 120 | 114      | 138    | 113 | 0     | 0     | 1201    | 143 |
| 144        | 0     | 0             | 119   | 113               | 129  | 130              | 117 | 124 | 103 | 124      | 132    | 110 | 0     | 0     | 1201    | 144 |
| 145        | 0     | 0             | 0     | 650               | 311  | 240              | 0   | 0   | 0   | 0        | 0      | 0   | 0     | 0     | 1201    | 145 |
| 146        | 0     | 0             | 0     | 0                 | 0    | 0                | 0   | 0   | 0   | 0        | 0      | 0   | 0     | 1201  | 1201    | 146 |
| 147        | 0     | 0             | 0     | 235               | 286  | 425              | 255 | 0   | 0   | 0        | 0      | 0   | 0     | 0     | 1201    | 147 |
| 148        | 0     | 0             | 0     | 68                | 172  | 202              | 79  | 262 | 66  | 97       | 79     | 176 | 0     | 0     | 1201    | 148 |
| 149        | 0     | 0             | 385   | 136               | 76   | 79               | 70  | 150 | 112 | 92       | 86     | 15  | 0     | 0     | 1201    | 149 |
| 150        | 0     | 0             | 387   | 141               | 79   | 59               | 105 | 67  | 124 | 92       | 90     | 57  | 0     | 0     | 1201    | 150 |
| 151        | 0     | 0             | 454   | 11                | 170  | 8                | 172 | 12  | 169 | 23       | 168    | 14  | 0     | 0     | 1201    | 151 |
| 152        | 0     | 0             | 1106  | 0                 | 39   | 16               | 0   | 40  | 0   | 0        | 0      | 0   | 0     | 0     | 1201    | 152 |
| 153        | 0     | 0             | 1201  | 0                 | 0    | 0                | 0   | 0   | 0   | 0        | 0      | 0   | 0     | 0     | 1201    | 153 |
| 154        | 0     | 0             | 0     | 0                 | 0    | 0                | 0   | 0   | 0   | 0        | 0      | 0   | 1201  | 0     | 0       | 154 |
| 155        | 0     | 0             | 0     | 0                 | 0    | 0                | 0   | 0   | 0   | 0        | 0      | 0   | 1201  | 0     | 0       | 155 |
| 156        | 0     | 0             | 0     | 218               | 228  | 248              | 235 | 129 | 116 | 0        | 14     | 13  | 0     | 0     | 1201    | 156 |
| 157        | 0     | 0             | 44    | 95                | 151  | 97               | 80  | 94  | 124 | 118      | 99     | 112 | 187   | 0     | 1014    | 157 |
| 158        | 0     | 0             | 0     | 308               | 593  | 300              | 0   | 0   | 0   | 0        | 0      | 0   | 0     | 0     | 1201    | 158 |
| 159        | 0     | 0             | 0     | 235               | 286  | 425              | 255 | 0   | 0   | 0        | 0      | 0   | 0     | 0     | 1201    | 159 |
| 160        | 0     | 0             | 0     | 576               | 625  | 0                | 0   | 0   | 0   | 0        | 0      | 0   | 0     | 0     | 1201    | 160 |
| 161        | 0     | 0             | 0     | 124               | 111  | 148              | 138 | 190 | 235 | 114      | 141    | 0   | 0     | 0     | 1201    | 161 |
| 162        | 0     | 0             | 0     | 600               | 601  | 0                | 0   | 0   | 0   | 0        | 0      | 0   | 0     | 0     | 1201    | 162 |

| SINGLE COL | COL & | FREQUENCIES - | FOR 0 | USPEW2002-01NII 1 | 2   | 3   | (COLS. 1-200 ) 4 | 5   | / 6 | NCARDS 7 | 1201 8 | 9   | BLANK | OTHER | NONBLNK | COL |
|------------|-------|---------------|-------|-------------------|-----|-----|------------------|-----|-----|----------|--------|-----|-------|-------|---------|-----|
| 163        | 0     | 0             | 0     | 963               | 140 | 0   | 0                | 0   | 0   | 0        | 0      | 98  | 0     | 0     | 1201    | 163 |
| 164        | 0     | 0             | 0     | 631               | 324 | 0   | 0                | 0   | 0   | 0        | 0      | 246 | 0     | 0     | 1201    | 164 |
| 165        | 0     | 0             | 0     | 736               | 341 | 0   | 0                | 0   | 0   | 0        | 0      | 124 | 0     | 0     | 1201    | 165 |
| 166        | 0     | 0             | 0     | 406               | 143 | 0   | 0                | 0   | 0   | 0        | 0      | 652 | 0     | 0     | 1201    | 166 |
| 167        | 0     | 0             | 0     | 390               | 38  | 0   | 0                | 0   | 0   | 0        | 0      | 773 | 0     | 0     | 1201    | 167 |
| 168        | 0     | 0             | 0     | 639               | 425 | 99  | 34               | 0   | 0   | 0        | 0      | 4   | 0     | 0     | 1201    | 168 |
| 169        | 0     | 0             | 0     | 251               | 444 | 252 | 238              | 0   | 0   | 0        | 0      | 16  | 0     | 0     | 1201    | 169 |
| 170        | 0     | 0             | 0     | 385               | 538 | 178 | 90               | 0   | 0   | 0        | 0      | 10  | 0     | 0     | 1201    | 170 |
| 171        | 0     | 0             | 0     | 287               | 454 | 285 | 173              | 0   | 0   | 0        | 0      | 2   | 0     | 0     | 1201    | 171 |
| 172        | 0     | 0             | 0     | 61                | 240 | 416 | 474              | 0   | 0   | 0        | 0      | 10  | 0     | 0     | 1201    | 172 |
| 173        | 0     | 0             | 0     | 170               | 307 | 199 | 158              | 0   | 0   | 0        | 0      | 7   | 360   | 0     | 841     | 173 |
| 174        | 0     | 0             | 0     | 771               | 204 | 115 | 8                | 89  | 12  | 0        | 0      | 2   | 0     | 0     | 1201    | 174 |
| 175        | 0     | 0             | 0     | 192               | 335 | 139 | 26               | 103 | 6   | 0        | 0      | 0   | 400   | 0     | 801     | 175 |
| 176        | 0     | 0             | 0     | 0                 | 0   | 0   | 0                | 0   | 0   | 0        | 0      | 0   | 1201  | 0     | 0       | 176 |
| 177        | 0     | 0             | 0     | 0                 | 0   | 0   | 0                | 0   | 0   | 0        | 0      | 0   | 1201  | 0     | 0       | 177 |
| 178        | 0     | 0             | 0     | 0                 | 0   | 0   | 0                | 0   | 0   | 0        | 0      | 0   | 1201  | 0     | 0       | 178 |
| 179        | 0     | 0             | 0     | 0                 | 0   | 0   | 0                | 0   | 0   | 0        | 0      | 0   | 1201  | 0     | 0       | 179 |
| 180        | 0     | 0             | 0     | 0                 | 0   | 0   | 0                | 0   | 0   | 0        | 0      | 0   | 1201  | 0     | 0       | 180 |
| 181        | 0     | 0             | 0     | 0                 | 0   | 0   | 0                | 0   | 0   | 0        | 0      | 0   | 1201  | 0     | 0       | 181 |
| 182        | 0     | 0             | 0     | 0                 | 0   | 0   | 0                | 0   | 0   | 0        | 0      | 0   | 1201  | 0     | 0       | 182 |
| 183        | 0     | 0             | 0     | 313               | 339 | 311 | 0                | 0   | 0   | 0        | 0      | 0   | 238   | 0     | 963     | 183 |
| 184        | 0     | 0             | 0     | 66                | 73  | 161 | 12               | 0   | 0   | 0        | 0      | 1   | 888   | 0     | 313     | 184 |
| 185        | 0     | 0             | 0     | 9                 | 12  | 9   | 0                | 0   | 0   | 0        | 0      | 0   | 1171  | 0     | 30      | 185 |
| 186        | 0     | 0             | 0     | 0                 | 0   | 0   | 0                | 0   | 0   | 0        | 0      | 0   | 1201  | 0     | 0       | 186 |
| 187        | 0     | 0             | 0     | 0                 | 0   | 0   | 0                | 0   | 0   | 0        | 0      | 0   | 1201  | 0     | 0       | 187 |
| 188        | 0     | 0             | 0     | 0                 | 0   | 0   | 0                | 0   | 0   | 0        | 0      | 0   | 1201  | 0     | 0       | 188 |
| 189        | 0     | 0             | 0     | 0                 | 0   | 0   | 0                | 0   | 0   | 0        | 0      | 0   | 1201  | 0     | 0       | 189 |
| 190        | 0     | 0             | 0     | 0                 | 0   | 0   | 0                | 0   | 0   | 0        | 0      | 0   | 1201  | 0     | 0       | 190 |
| 191        | 0     | 0             | 0     | 0                 | 0   | 0   | 0                | 0   | 0   | 0        | 0      | 0   | 1201  | 0     | 0       | 191 |
| 192        | 0     | 0             | 0     | 0                 | 0   | 0   | 0                | 0   | 0   | 0        | 0      | 0   | 1201  | 0     | 0       | 192 |
| 193        | 0     | 0             | 0     | 0                 | 0   | 0   | 0                | 0   | 0   | 0        | 0      | 0   | 1201  | 0     | 0       | 193 |
| 194        | 0     | 0             | 0     | 0                 | 0   | 0   | 0                | 0   | 0   | 0        | 0      | 0   | 1201  | 0     | 0       | 194 |
| 195        | 0     | 0             | 0     | 0                 | 0   | 0   | 0                | 0   | 0   | 0        | 0      | 0   | 1201  | 0     | 0       | 195 |
| 196        | 0     | 0             | 0     | 0                 | 0   | 0   | 0                | 0   | 0   | 0        | 0      | 0   | 1201  | 0     | 0       | 196 |
| 197        | 0     | 0             | 0     | 0                 | 0   | 0   | 0                | 0   | 0   | 0        | 0      | 0   | 1201  | 0     | 0       | 197 |
| 198        | 0     | 0             | 0     | 0                 | 0   | 0   | 0                | 0   | 0   | 0        | 0      | 0   | 1201  | 0     | 0       | 198 |
| 199        | 0     | 0             | 0     | 0                 | 0   | 0   | 0                | 0   | 0   | 0        | 0      | 0   | 1201  | 0     | 0       | 199 |
| 200        | 0     | 0             | 0     | 0                 | 0   | 0   | 0                | 0   | 0   | 0        | 0      | 0   | 1201  | 0     | 0       | 200 |

| SINGLE COL | COL & | FREQUENCIES | FOR | USPEW2002-01NII | (COLS. 201-400 ) | /   | NCARDS 1201 |     |    |    |   |     |       |       |         |     |  |  |
|------------|-------|-------------|-----|-----------------|------------------|-----|-------------|-----|----|----|---|-----|-------|-------|---------|-----|--|--|
| COL        |       | -           | 0   | 1               | 2                | 3   | 4           | 5   | 6  | 7  | 8 | 9   | BLANK | OTHER | NONBLNK | COL |  |  |
| 201        | 0     | 0           | 0   | 0               | 0                | 0   | 0           | 0   | 0  | 0  | 0 | 0   | 1201  | 0     | 0       | 201 |  |  |
| 202        | 0     | 0           | 0   | 85              | 88               | 157 | 6           | 0   | 0  | 0  | 0 | 3   | 862   | 0     | 339     | 202 |  |  |
| 203        | 0     | 0           | 0   | 9               | 10               | 10  | 1           | 0   | 0  | 0  | 0 | 0   | 1171  | 0     | 30      | 203 |  |  |
| 204        | 0     | 0           | 0   | 0               | 0                | 0   | 0           | 0   | 0  | 0  | 0 | 0   | 1201  | 0     | 0       | 204 |  |  |
| 205        | 0     | 0           | 0   | 0               | 0                | 0   | 0           | 0   | 0  | 0  | 0 | 0   | 1201  | 0     | 0       | 205 |  |  |
| 206        | 0     | 0           | 0   | 0               | 0                | 0   | 0           | 0   | 0  | 0  | 0 | 0   | 1201  | 0     | 0       | 206 |  |  |
| 207        | 0     | 0           | 0   | 0               | 0                | 0   | 0           | 0   | 0  | 0  | 0 | 0   | 1201  | 0     | 0       | 207 |  |  |
| 208        | 0     | 0           | 0   | 0               | 0                | 0   | 0           | 0   | 0  | 0  | 0 | 0   | 1201  | 0     | 0       | 208 |  |  |
| 209        | 0     | 0           | 0   | 0               | 0                | 0   | 0           | 0   | 0  | 0  | 0 | 0   | 1201  | 0     | 0       | 209 |  |  |
| 210        | 0     | 0           | 0   | 0               | 0                | 0   | 0           | 0   | 0  | 0  | 0 | 0   | 1201  | 0     | 0       | 210 |  |  |
| 211        | 0     | 0           | 0   | 0               | 0                | 0   | 0           | 0   | 0  | 0  | 0 | 0   | 1201  | 0     | 0       | 211 |  |  |
| 212        | 0     | 0           | 0   | 47              | 32               | 23  | 51          | 83  | 15 | 44 | 8 | 8   | 890   | 0     | 311     | 212 |  |  |
| 213        | 0     | 0           | 0   | 7               | 10               | 11  | 3           | 15  | 9  | 9  | 2 | 0   | 1135  | 0     | 66      | 213 |  |  |
| 214        | 0     | 0           | 0   | 0               | 1                | 6   | 1           | 3   | 2  | 2  | 1 | 0   | 1185  | 0     | 16      | 214 |  |  |
| 215        | 0     | 0           | 0   | 1               | 1                | 0   | 5           | 1   | 0  | 0  | 0 | 0   | 1193  | 0     | 8       | 215 |  |  |
| 216        | 0     | 0           | 0   | 0               | 0                | 1   | 0           | 5   | 1  | 0  | 0 | 0   | 1194  | 0     | 7       | 216 |  |  |
| 217        | 0     | 0           | 0   | 0               | 0                | 0   | 1           | 0   | 4  | 1  | 0 | 0   | 1195  | 0     | 6       | 217 |  |  |
| 218        | 0     | 0           | 0   | 0               | 0                | 0   | 0           | 0   | 0  | 4  | 1 | 0   | 1196  | 0     | 5       | 218 |  |  |
| 219        | 0     | 0           | 0   | 0               | 0                | 0   | 0           | 0   | 0  | 0  | 3 | 0   | 1198  | 0     | 3       | 219 |  |  |
| 220        | 0     | 0           | 0   | 0               | 0                | 0   | 0           | 0   | 0  | 0  | 0 | 0   | 1201  | 0     | 0       | 220 |  |  |
| 221        | 0     | 0           | 0   | 0               | 0                | 0   | 0           | 0   | 0  | 0  | 0 | 0   | 1201  | 0     | 0       | 221 |  |  |
| 222        | 0     | 0           | 0   | 138             | 132              | 210 | 439         | 16  | 66 | 68 | 0 | 132 | 0     | 0     | 1201    | 222 |  |  |
| 223        | 0     | 0           | 0   | 131             | 470              | 311 | 237         | 0   | 0  | 0  | 0 | 52  | 0     | 0     | 1201    | 223 |  |  |
| 224        | 0     | 0           | 0   | 142             | 641              | 144 | 179         | 54  | 0  | 0  | 0 | 41  | 0     | 0     | 1201    | 224 |  |  |
| 225        | 0     | 0           | 0   | 556             | 187              | 426 | 0           | 0   | 0  | 0  | 0 | 32  | 0     | 0     | 1201    | 225 |  |  |
| 226        | 0     | 0           | 0   | 593             | 541              | 0   | 0           | 0   | 0  | 0  | 0 | 67  | 0     | 0     | 1201    | 226 |  |  |
| 227        | 0     | 0           | 0   | 543             | 594              | 0   | 0           | 0   | 0  | 0  | 0 | 64  | 0     | 0     | 1201    | 227 |  |  |
| 228        | 0     | 0           | 0   | 383             | 174              | 28  | 6           | 0   | 0  | 0  | 0 | 9   | 601   | 0     | 600     | 228 |  |  |
| 229        | 0     | 0           | 0   | 281             | 232              | 49  | 21          | 0   | 0  | 0  | 0 | 17  | 601   | 0     | 600     | 229 |  |  |
| 230        | 0     | 0           | 0   | 294             | 250              | 46  | 3           | 0   | 0  | 0  | 0 | 7   | 601   | 0     | 600     | 230 |  |  |
| 231        | 0     | 0           | 0   | 202             | 274              | 80  | 18          | 0   | 0  | 0  | 0 | 26  | 601   | 0     | 600     | 231 |  |  |
| 232        | 0     | 0           | 0   | 247             | 229              | 73  | 35          | 0   | 0  | 0  | 0 | 16  | 601   | 0     | 600     | 232 |  |  |
| 233        | 0     | 0           | 0   | 145             | 215              | 158 | 39          | 0   | 0  | 0  | 0 | 43  | 601   | 0     | 600     | 233 |  |  |
| 234        | 0     | 0           | 0   | 211             | 218              | 97  | 52          | 0   | 0  | 0  | 0 | 22  | 601   | 0     | 600     | 234 |  |  |
| 235        | 0     | 0           | 0   | 296             | 217              | 64  | 18          | 0   | 0  | 0  | 0 | 5   | 601   | 0     | 600     | 235 |  |  |
| 236        | 0     | 0           | 0   | 244             | 264              | 79  | 8           | 0   | 0  | 0  | 0 | 5   | 601   | 0     | 600     | 236 |  |  |
| 237        | 0     | 0           | 0   | 499             | 88               | 6   | 2           | 0   | 0  | 0  | 0 | 5   | 601   | 0     | 600     | 237 |  |  |
| 238        | 0     | 0           | 0   | 373             | 177              | 23  | 7           | 0   | 0  | 0  | 0 | 20  | 601   | 0     | 600     | 238 |  |  |
| 239        | 0     | 0           | 0   | 380             | 174              | 26  | 10          | 0   | 0  | 0  | 0 | 12  | 599   | 0     | 602     | 239 |  |  |
| 240        | 0     | 0           | 0   | 359             | 200              | 27  | 4           | 0   | 0  | 0  | 0 | 11  | 600   | 0     | 601     | 240 |  |  |
| 241        | 0     | 0           | 0   | 317             | 243              | 32  | 6           | 0   | 0  | 0  | 0 | 4   | 599   | 0     | 602     | 241 |  |  |
| 242        | 0     | 0           | 0   | 252             | 290              | 44  | 10          | 0   | 0  | 0  | 0 | 6   | 599   | 0     | 602     | 242 |  |  |
| 243        | 0     | 0           | 0   | 252             | 188              | 89  | 52          | 0   | 0  | 0  | 0 | 21  | 599   | 0     | 602     | 243 |  |  |
| 244        | 0     | 0           | 0   | 302             | 230              | 44  | 15          | 0   | 0  | 0  | 0 | 11  | 599   | 0     | 602     | 244 |  |  |
| 245        | 0     | 0           | 0   | 138             | 340              | 83  | 12          | 0   | 0  | 0  | 0 | 28  | 600   | 0     | 601     | 245 |  |  |
| 246        | 0     | 0           | 0   | 421             | 163              | 10  | 3           | 0   | 0  | 0  | 0 | 5   | 599   | 0     | 602     | 246 |  |  |
| 247        | 0     | 0           | 0   | 243             | 276              | 53  | 19          | 0   | 0  | 0  | 0 | 11  | 599   | 0     | 602     | 247 |  |  |
| 248        | 0     | 0           | 0   | 384             | 168              | 28  | 9           | 0   | 0  | 0  | 0 | 13  | 599   | 0     | 602     | 248 |  |  |
| 249        | 0     | 0           | 0   | 246             | 280              | 47  | 12          | 0   | 0  | 0  | 0 | 17  | 599   | 0     | 602     | 249 |  |  |
| 250        | 0     | 0           | 0   | 663             | 49               | 436 | 0           | 0   | 0  | 0  | 0 | 53  | 0     | 0     | 1201    | 250 |  |  |
| 251        | 0     | 0           | 0   | 294             | 218              | 1   | 69          | 0   | 0  | 0  | 0 | 18  | 601   | 0     | 600     | 251 |  |  |
| 252        | 0     | 0           | 0   | 216             | 295              | 1   | 80          | 0   | 0  | 0  | 0 | 9   | 600   | 0     | 601     | 252 |  |  |
| 253        | 0     | 0           | 0   | 636             | 468              | 63  | 0           | 0   | 0  | 0  | 0 | 34  | 0     | 0     | 1201    | 253 |  |  |
| 254        | 0     | 0           | 0   | 111             | 143              | 143 | 27          | 0   | 0  | 0  | 0 | 44  | 733   | 0     | 468     | 254 |  |  |
| 255        | 0     | 0           | 0   | 468             | 490              | 0   | 0           | 0   | 0  | 0  | 0 | 243 | 0     | 0     | 1201    | 255 |  |  |
| 256        | 0     | 0           | 0   | 179             | 243              | 40  | 0           | 0   | 0  | 0  | 0 | 138 | 601   | 0     | 600     | 256 |  |  |
| 257        | 0     | 0           | 0   | 226             | 236              | 28  | 0           | 0   | 0  | 0  | 0 | 110 | 601   | 0     | 600     | 257 |  |  |
| 258        | 0     | 0           | 0   | 230             | 203              | 41  | 0           | 0   | 0  | 0  | 0 | 126 | 601   | 0     | 600     | 258 |  |  |
| 259        | 0     | 0           | 0   | 266             | 206              | 29  | 0           | 0   | 0  | 0  | 0 | 99  | 601   | 0     | 600     | 259 |  |  |
| 260        | 0     | 0           | 0   | 309             | 96               | 38  | 0           | 0   | 0  | 0  | 0 | 157 | 601   | 0     | 600     | 260 |  |  |
| 261        | 0     | 0           | 0   | 128             | 275              | 40  | 0           | 0   | 0  | 0  | 0 | 158 | 600   | 0     | 601     | 261 |  |  |
| 262        | 0     | 0           | 0   | 106             | 285              | 32  | 0           | 0   | 0  | 0  | 0 | 178 | 600   | 0     | 601     | 262 |  |  |
| 263        | 0     | 0           | 0   | 229             | 179              | 30  | 0           | 0   | 0  | 0  | 0 | 163 | 600   | 0     | 601     | 263 |  |  |
| 264        | 0     | 0           | 0   | 249             | 147              | 59  | 0           | 0   | 0  | 0  | 0 | 146 | 600   | 0     | 601     | 264 |  |  |
| 265        | 0     | 0           | 0   | 322             | 85               | 36  | 0           | 0   | 0  | 0  | 0 | 158 | 600   | 0     | 601     | 265 |  |  |
| 266        | 0     | 0           | 0   | 137             | 141              | 128 | 122         | 413 | 5  | 46 | 0 | 209 | 0     | 0     | 1201    | 266 |  |  |
| 267        | 0     | 0           | 0   | 456             | 615              | 74  | 32          | 0   | 0  | 0  | 0 | 24  | 0     | 0     | 1201    | 267 |  |  |
| 268        | 0     | 0           | 0   | 137             | 580              | 371 | 77          | 0   | 0  | 0  | 0 | 36  | 0     | 0     | 1201    | 268 |  |  |
| 269        | 0     | 0           | 0   | 519             | 490              | 143 | 0           | 0   | 0  | 0  | 0 | 49  | 0     | 0     | 1201    | 269 |  |  |
| 270        | 0     | 0           | 0   | 49              | 1116             | 0   | 0           | 0   | 0  | 0  | 0 | 36  | 0     | 0     | 1201    | 270 |  |  |
| 271        | 0     | 0           | 0   | 434             | 101              | 0   | 0           | 0   | 0  | 0  | 0 | 65  | 601   | 0     | 600     | 271 |  |  |
| 272        | 0     | 0           | 0   | 339             | 192              | 0   | 0           | 0   | 0  | 0  | 0 | 70  | 600   | 0     | 601     | 272 |  |  |
| 273        | 0     | 0           | 0   | 916             | 192              | 60  | 0           | 0   | 0  | 0  | 0 | 33  | 0     | 0     | 1201    | 273 |  |  |
| 274        | 0     | 0           | 0   | 979             | 143              | 47  | 0           | 0   | 0  | 0  | 0 | 32  | 0     | 0     | 1201    | 274 |  |  |
| 275        | 0     | 0           | 0   | 872             | 246              | 54  | 0           | 0   | 0  | 0  | 0 | 29  | 0     | 0     | 1201    | 275 |  |  |
| 276        | 0     | 0           | 0   | 402             | 579              | 50  | 46          | 0   | 0  | 0  | 0 | 124 | 0     | 0     | 1201    | 276 |  |  |
| 277        | 0     | 0           | 0   | 264             | 115              | 0   | 0           | 0   | 0  | 0  | 0 | 23  | 799   | 0     | 402     | 277 |  |  |
| 278        | 0     | 0           | 0   | 450             | 347              | 0   | 0           | 0   | 0  | 0  | 0 | 46  | 358   | 0     | 843     | 278 |  |  |
| 279        | 0     | 0           | 0   | 396             | 94               | 0   | 0           | 0   | 0  | 0  | 0 | 110 | 601   | 0     | 600     | 279 |  |  |
| 280        | 0     | 0           | 0   | 432             | 91               | 0   | 0           | 0   | 0  | 0  | 0 | 78  | 600   | 0     | 601     | 280 |  |  |
| 281        | 0     | 0           | 0   | 849             | 243              | 0   | 0           | 0   | 0  | 0  | 0 | 109 | 0     | 0     | 1201    | 281 |  |  |

| SINGLE COL | COL & | FREQUENCIES | FOR | USPEW2002-01NII | (COLS. 201-400 ) | /   | NCARDS | 1201 |     |     |     |     |       |       |         |     |  |
|------------|-------|-------------|-----|-----------------|------------------|-----|--------|------|-----|-----|-----|-----|-------|-------|---------|-----|--|
| COL        |       | -           | 0   | 1               | 2                | 3   | 4      | 5    | 6   | 7   | 8   | 9   | BLANK | OTHER | NONBLNK | COL |  |
| 282        | 0     | 0           | 0   | 167             | 39               | 274 | 0      | 0    | 0   | 0   | 0   | 120 | 601   | 0     | 600     | 282 |  |
| 283        | 0     | 0           | 0   | 91              | 69               | 313 | 0      | 0    | 0   | 0   | 0   | 128 | 600   | 0     | 601     | 283 |  |
| 284        | 0     | 0           | 0   | 817             | 318              | 0   | 0      | 0    | 0   | 0   | 0   | 66  | 0     | 0     | 1201    | 284 |  |
| 285        | 0     | 0           | 0   | 696             | 441              | 0   | 0      | 0    | 0   | 0   | 0   | 64  | 0     | 0     | 1201    | 285 |  |
| 286        | 0     | 0           | 0   | 507             | 523              | 33  | 0      | 0    | 0   | 0   | 0   | 138 | 0     | 0     | 1201    | 286 |  |
| 287        | 0     | 0           | 0   | 790             | 267              | 0   | 0      | 0    | 0   | 0   | 0   | 144 | 0     | 0     | 1201    | 287 |  |
| 288        | 0     | 0           | 0   | 105             | 265              | 173 | 53     | 0    | 0   | 0   | 0   | 4   | 601   | 0     | 600     | 288 |  |
| 289        | 0     | 0           | 0   | 57              | 162              | 233 | 145    | 1    | 0   | 0   | 0   | 3   | 600   | 0     | 601     | 289 |  |
| 290        | 0     | 0           | 0   | 247             | 199              | 635 | 0      | 0    | 0   | 0   | 0   | 120 | 0     | 0     | 1201    | 290 |  |
| 291        | 0     | 0           | 0   | 327             | 173              | 58  | 20     | 0    | 0   | 0   | 0   | 22  | 601   | 0     | 600     | 291 |  |
| 292        | 0     | 0           | 0   | 249             | 207              | 74  | 33     | 0    | 0   | 0   | 0   | 37  | 601   | 0     | 600     | 292 |  |
| 293        | 0     | 0           | 0   | 305             | 174              | 61  | 30     | 0    | 0   | 0   | 0   | 30  | 601   | 0     | 600     | 293 |  |
| 294        | 0     | 0           | 0   | 241             | 243              | 71  | 24     | 0    | 0   | 0   | 0   | 21  | 601   | 0     | 600     | 294 |  |
| 295        | 0     | 0           | 0   | 234             | 204              | 103 | 30     | 0    | 0   | 0   | 0   | 30  | 600   | 0     | 601     | 295 |  |
| 296        | 0     | 0           | 0   | 317             | 204              | 47  | 20     | 0    | 0   | 0   | 0   | 13  | 600   | 0     | 601     | 296 |  |
| 297        | 0     | 0           | 0   | 136             | 250              | 135 | 60     | 0    | 0   | 0   | 0   | 20  | 600   | 0     | 601     | 297 |  |
| 298        | 0     | 0           | 0   | 216             | 255              | 83  | 28     | 0    | 0   | 0   | 0   | 19  | 600   | 0     | 601     | 298 |  |
| 299        | 0     | 0           | 0   | 914             | 287              | 0   | 0      | 0    | 0   | 0   | 0   | 0   | 0     | 0     | 1201    | 299 |  |
| 300        | 0     | 0           | 0   | 807             | 107              | 0   | 0      | 0    | 0   | 0   | 0   | 0   | 287   | 0     | 914     | 300 |  |
| 301        | 0     | 0           | 0   | 0               | 0                | 0   | 0      | 0    | 0   | 0   | 0   | 0   | 1201  | 0     | 0       | 301 |  |
| 302        | 0     | 0           | 0   | 40              | 169              | 236 | 267    | 198  | 137 | 100 | 39  | 15  | 0     | 0     | 1201    | 302 |  |
| 303        | 0     | 0           | 143 | 100             | 141              | 104 | 113    | 126  | 98  | 116 | 124 | 136 | 0     | 0     | 1201    | 303 |  |
| 304        | 0     | 0           | 0   | 28              | 77               | 312 | 36     | 288  | 258 | 198 | 0   | 4   | 0     | 0     | 1201    | 304 |  |
| 305        | 0     | 0           | 0   | 87              | 1109             | 0   | 0      | 0    | 0   | 0   | 0   | 5   | 0     | 0     | 1201    | 305 |  |
| 306        | 0     | 0           | 0   | 87              | 1114             | 0   | 0      | 0    | 0   | 0   | 0   | 0   | 0     | 0     | 1201    | 306 |  |
| 307        | 0     | 0           | 0   | 1017            | 93               | 23  | 52     | 0    | 0   | 0   | 0   | 16  | 0     | 0     | 1201    | 307 |  |
| 308        | 0     | 0           | 0   | 667             | 150              | 30  | 107    | 246  | 0   | 0   | 0   | 1   | 0     | 0     | 1201    | 308 |  |
| 309        | 0     | 0           | 0   | 397             | 803              | 0   | 0      | 0    | 0   | 0   | 0   | 1   | 0     | 0     | 1201    | 309 |  |
| 310        | 0     | 0           | 0   | 0               | 0                | 0   | 0      | 0    | 0   | 0   | 0   | 0   | 1201  | 0     | 0       | 310 |  |
| 311        | 0     | 0           | 0   | 643             | 299              | 19  | 23     | 9    | 8   | 45  | 122 | 33  | 0     | 0     | 1201    | 311 |  |
| 312        | 0     | 0           | 0   | 0               | 0                | 0   | 0      | 0    | 0   | 0   | 0   | 0   | 1201  | 0     | 0       | 312 |  |
| 313        | 0     | 0           | 0   | 0               | 0                | 0   | 0      | 0    | 0   | 0   | 0   | 0   | 1137  | 64    | 64      | 313 |  |
| 314        | 0     | 0           | 0   | 0               | 0                | 0   | 0      | 0    | 0   | 64  | 0   | 0   | 1137  | 0     | 64      | 314 |  |
| 315        | 0     | 0           | 0   | 0               | 0                | 0   | 0      | 0    | 0   | 0   | 0   | 0   | 1137  | 64    | 64      | 315 |  |
| 316        | 0     | 0           | 0   | 0               | 0                | 0   | 0      | 0    | 0   | 0   | 0   | 0   | 1137  | 64    | 64      | 316 |  |
| 317        | 0     | 0           | 0   | 0               | 0                | 0   | 0      | 0    | 0   | 0   | 0   | 0   | 1137  | 64    | 64      | 317 |  |
| 318        | 0     | 0           | 0   | 0               | 0                | 0   | 0      | 0    | 0   | 0   | 0   | 0   | 1137  | 64    | 64      | 318 |  |
| 319        | 0     | 0           | 0   | 0               | 0                | 0   | 0      | 0    | 0   | 0   | 0   | 0   | 1137  | 64    | 64      | 319 |  |
| 320        | 0     | 0           | 0   | 0               | 0                | 0   | 0      | 0    | 0   | 0   | 0   | 0   | 1137  | 64    | 64      | 320 |  |
| 321        | 0     | 0           | 0   | 0               | 0                | 0   | 0      | 0    | 0   | 0   | 0   | 0   | 1201  | 0     | 0       | 321 |  |
| 322        | 0     | 0           | 0   | 0               | 0                | 0   | 0      | 0    | 0   | 0   | 0   | 0   | 1137  | 64    | 64      | 322 |  |
| 323        | 0     | 0           | 0   | 0               | 0                | 0   | 0      | 0    | 0   | 0   | 0   | 0   | 1137  | 64    | 64      | 323 |  |
| 324        | 0     | 0           | 0   | 0               | 0                | 0   | 0      | 0    | 0   | 0   | 0   | 0   | 1137  | 64    | 64      | 324 |  |
| 325        | 0     | 0           | 0   | 0               | 0                | 0   | 0      | 0    | 0   | 0   | 0   | 0   | 1137  | 64    | 64      | 325 |  |
| 326        | 0     | 0           | 0   | 0               | 0                | 0   | 0      | 0    | 0   | 0   | 0   | 0   | 1137  | 64    | 64      | 326 |  |
| 327        | 0     | 0           | 0   | 0               | 0                | 0   | 0      | 0    | 0   | 0   | 0   | 0   | 1137  | 64    | 64      | 327 |  |
| 328        | 0     | 0           | 0   | 0               | 0                | 0   | 0      | 0    | 0   | 0   | 0   | 0   | 1137  | 64    | 64      | 328 |  |
| 329        | 0     | 0           | 0   | 0               | 0                | 0   | 0      | 0    | 0   | 0   | 0   | 0   | 1137  | 64    | 64      | 329 |  |
| 330        | 0     | 0           | 0   | 0               | 0                | 0   | 0      | 0    | 0   | 0   | 0   | 0   | 1201  | 0     | 0       | 330 |  |
| 331        | 0     | 0           | 0   | 0               | 0                | 0   | 0      | 0    | 0   | 0   | 0   | 0   | 1137  | 64    | 64      | 331 |  |
| 332        | 0     | 0           | 0   | 0               | 0                | 0   | 0      | 0    | 0   | 0   | 0   | 0   | 1137  | 64    | 64      | 332 |  |
| 333        | 0     | 0           | 0   | 0               | 0                | 0   | 0      | 0    | 0   | 0   | 0   | 0   | 1137  | 64    | 64      | 333 |  |
| 334        | 0     | 0           | 0   | 0               | 0                | 0   | 0      | 0    | 0   | 0   | 0   | 0   | 1137  | 64    | 64      | 334 |  |
| 335        | 0     | 0           | 0   | 0               | 0                | 0   | 0      | 0    | 0   | 0   | 0   | 0   | 1137  | 64    | 64      | 335 |  |
| 336        | 0     | 0           | 0   | 0               | 0                | 0   | 0      | 0    | 0   | 0   | 0   | 0   | 1137  | 64    | 64      | 336 |  |
| 337        | 0     | 0           | 0   | 0               | 0                | 0   | 0      | 0    | 0   | 0   | 0   | 0   | 1137  | 64    | 64      | 337 |  |
| 338        | 0     | 0           | 0   | 0               | 0                | 0   | 0      | 0    | 0   | 0   | 0   | 0   | 1137  | 64    | 64      | 338 |  |
| 339        | 0     | 0           | 0   | 0               | 0                | 0   | 0      | 0    | 0   | 0   | 0   | 0   | 1137  | 64    | 64      | 339 |  |
| 340        | 0     | 0           | 0   | 0               | 0                | 0   | 0      | 0    | 0   | 0   | 0   | 0   | 1137  | 64    | 64      | 340 |  |
| 341        | 0     | 0           | 0   | 0               | 0                | 0   | 0      | 0    | 0   | 0   | 0   | 0   | 1137  | 64    | 64      | 341 |  |
| 342        | 0     | 0           | 0   | 0               | 0                | 0   | 1      | 0    | 0   | 0   | 0   | 0   | 1137  | 63    | 64      | 342 |  |
| 343        | 0     | 0           | 0   | 0               | 0                | 0   | 0      | 0    | 0   | 0   | 0   | 0   | 1139  | 62    | 62      | 343 |  |
| 344        | 0     | 0           | 0   | 0               | 0                | 0   | 0      | 0    | 0   | 0   | 0   | 0   | 1138  | 63    | 63      | 344 |  |
| 345        | 0     | 3           | 0   | 0               | 0                | 0   | 0      | 0    | 0   | 0   | 0   | 0   | 1145  | 53    | 56      | 345 |  |
| 346        | 0     | 0           | 0   | 0               | 0                | 0   | 0      | 0    | 0   | 0   | 0   | 0   | 1140  | 61    | 61      | 346 |  |
| 347        | 0     | 0           | 0   | 0               | 0                | 0   | 0      | 0    | 0   | 0   | 0   | 0   | 1142  | 59    | 59      | 347 |  |
| 348        | 0     | 0           | 0   | 0               | 0                | 0   | 0      | 0    | 0   | 0   | 0   | 0   | 1147  | 54    | 54      | 348 |  |
| 349        | 0     | 0           | 0   | 0               | 0                | 0   | 0      | 0    | 0   | 0   | 0   | 0   | 1153  | 48    | 48      | 349 |  |
| 350        | 0     | 0           | 0   | 0               | 0                | 0   | 0      | 0    | 0   | 0   | 0   | 0   | 1161  | 40    | 40      | 350 |  |
| 351        | 0     | 0           | 0   | 0               | 0                | 0   | 0      | 0    | 0   | 0   | 0   | 0   | 1175  | 26    | 26      | 351 |  |
| 352        | 0     | 0           | 0   | 0               | 0                | 0   | 0      | 0    | 0   | 0   | 0   | 0   | 1175  | 26    | 26      | 352 |  |
| 353        | 0     | 0           | 0   | 0               | 0                | 0   | 0      | 0    | 0   | 0   | 0   | 0   | 1181  | 20    | 20      | 353 |  |
| 354        | 0     | 0           | 0   | 0               | 0                | 0   | 0      | 0    | 0   | 0   | 0   | 0   | 1180  | 21    | 21      | 354 |  |
| 355        | 0     | 0           | 0   | 0               | 0                | 0   | 0      | 0    | 0   | 0   | 0   | 0   | 1181  | 20    | 20      | 355 |  |
| 356        | 0     | 0           | 0   | 0               | 0                | 0   | 0      | 0    | 0   | 0   | 0   | 0   | 1180  | 21    | 21      | 356 |  |
| 357        | 0     | 0           | 1   | 0               | 0                | 0   | 0      | 0    | 0   | 0   | 0   | 0   | 1184  | 16    | 17      | 357 |  |
| 358        | 0     | 0           | 0   | 0               | 0                | 0   | 0      | 0    | 0   | 0   | 0   | 0   | 1186  | 15    | 15      | 358 |  |
| 359        | 0     | 0           | 0   | 0               | 0                | 0   | 0      | 0    | 0   | 0   | 0   | 0   | 1187  | 14    | 14      | 359 |  |
| 360        | 0     | 0           | 0   | 0               | 0                | 0   | 0      | 0    | 0   | 0   | 0   | 0   | 1194  | 7     | 7       | 360 |  |
| 361        | 0     | 0           | 0   | 0               | 0                | 0   | 0      | 0    | 0   | 0   | 0   | 0   | 1193  | 8     | 8       | 361 |  |
| 362        | 0     | 0           | 0   | 0               | 0                | 0   | 0      | 0    | 0   | 0   | 0   | 0   | 1194  | 7     | 7       | 362 |  |

| SINGLE COL | COL & | FREQUENCIES - | FOR 0 | USPEW2002-01NII 1 | 2 | 3 | (COLS. 201-400 ) 4 | 5 | / 6 | NCARDS 7 | 1201 8 | 9 | BLANK | OTHER | NONBLNK | 2 COL |
|------------|-------|---------------|-------|-------------------|---|---|--------------------|---|-----|----------|--------|---|-------|-------|---------|-------|
| 363        | 0     | 0             | 0     | 0                 | 0 | 0 | 0                  | 0 | 0   | 0        | 0      | 0 | 1195  | 6     | 6       | 363   |
| 364        | 0     | 0             | 0     | 0                 | 0 | 0 | 0                  | 0 | 0   | 0        | 0      | 0 | 1193  | 8     | 8       | 364   |
| 365        | 0     | 0             | 0     | 0                 | 0 | 0 | 0                  | 0 | 0   | 0        | 0      | 0 | 1194  | 7     | 7       | 365   |
| 366        | 0     | 1             | 0     | 0                 | 0 | 0 | 0                  | 0 | 0   | 0        | 0      | 0 | 1196  | 4     | 5       | 366   |
| 367        | 0     | 0             | 0     | 0                 | 0 | 0 | 0                  | 0 | 0   | 0        | 0      | 0 | 1195  | 6     | 6       | 367   |
| 368        | 0     | 0             | 0     | 0                 | 0 | 0 | 0                  | 0 | 0   | 0        | 0      | 0 | 1196  | 5     | 5       | 368   |
| 369        | 0     | 0             | 0     | 0                 | 0 | 0 | 0                  | 0 | 0   | 0        | 0      | 0 | 1196  | 5     | 5       | 369   |
| 370        | 0     | 0             | 0     | 0                 | 0 | 0 | 0                  | 0 | 0   | 0        | 0      | 0 | 1194  | 7     | 7       | 370   |
| 371        | 0     | 0             | 0     | 0                 | 0 | 0 | 0                  | 0 | 0   | 0        | 0      | 0 | 1195  | 6     | 6       | 371   |
| 372        | 0     | 0             | 0     | 0                 | 0 | 0 | 0                  | 0 | 0   | 0        | 0      | 0 | 1195  | 6     | 6       | 372   |
| 373        | 0     | 0             | 0     | 0                 | 0 | 0 | 0                  | 0 | 0   | 0        | 0      | 0 | 1195  | 6     | 6       | 373   |
| 374        | 0     | 0             | 0     | 0                 | 0 | 0 | 0                  | 0 | 0   | 0        | 0      | 0 | 1196  | 5     | 5       | 374   |
| 375        | 0     | 0             | 0     | 0                 | 0 | 0 | 0                  | 0 | 0   | 0        | 0      | 0 | 1197  | 4     | 4       | 375   |
| 376        | 0     | 0             | 0     | 0                 | 0 | 0 | 0                  | 0 | 0   | 0        | 0      | 0 | 1197  | 4     | 4       | 376   |
| 377        | 0     | 0             | 0     | 0                 | 0 | 0 | 0                  | 0 | 0   | 0        | 0      | 0 | 1197  | 4     | 4       | 377   |
| 378        | 0     | 0             | 0     | 0                 | 0 | 0 | 0                  | 0 | 0   | 0        | 0      | 0 | 1197  | 4     | 4       | 378   |
| 379        | 0     | 1             | 0     | 0                 | 0 | 0 | 0                  | 0 | 0   | 0        | 0      | 0 | 1196  | 4     | 5       | 379   |
| 380        | 0     | 0             | 0     | 0                 | 0 | 0 | 0                  | 0 | 0   | 0        | 0      | 0 | 1198  | 3     | 3       | 380   |
| 381        | 0     | 0             | 0     | 0                 | 0 | 0 | 0                  | 0 | 0   | 0        | 0      | 0 | 1197  | 4     | 4       | 381   |
| 382        | 0     | 0             | 0     | 0                 | 0 | 0 | 0                  | 0 | 0   | 0        | 0      | 0 | 1197  | 4     | 4       | 382   |
| 383        | 0     | 0             | 0     | 0                 | 0 | 0 | 0                  | 0 | 0   | 0        | 0      | 0 | 1198  | 3     | 3       | 383   |
| 384        | 0     | 0             | 0     | 0                 | 0 | 0 | 0                  | 0 | 0   | 0        | 0      | 0 | 1198  | 3     | 3       | 384   |
| 385        | 0     | 0             | 0     | 0                 | 0 | 0 | 0                  | 0 | 0   | 0        | 0      | 0 | 1198  | 3     | 3       | 385   |
| 386        | 0     | 0             | 0     | 0                 | 0 | 0 | 0                  | 0 | 0   | 0        | 0      | 0 | 1199  | 2     | 2       | 386   |
| 387        | 0     | 0             | 0     | 0                 | 0 | 0 | 0                  | 0 | 0   | 0        | 0      | 0 | 1199  | 2     | 2       | 387   |
| 388        | 0     | 0             | 0     | 0                 | 0 | 0 | 0                  | 0 | 0   | 0        | 0      | 0 | 1200  | 1     | 1       | 388   |
| 389        | 0     | 0             | 0     | 0                 | 0 | 0 | 0                  | 0 | 0   | 0        | 0      | 0 | 1201  | 0     | 0       | 389   |
| 390        | 0     | 0             | 0     | 0                 | 0 | 0 | 0                  | 0 | 0   | 0        | 0      | 0 | 1200  | 1     | 1       | 390   |
| 391        | 0     | 0             | 0     | 0                 | 0 | 0 | 0                  | 0 | 0   | 0        | 0      | 0 | 1200  | 1     | 1       | 391   |
| 392        | 0     | 0             | 0     | 0                 | 0 | 0 | 0                  | 0 | 0   | 0        | 0      | 0 | 1201  | 0     | 0       | 392   |
| 393        | 0     | 0             | 0     | 0                 | 0 | 0 | 0                  | 0 | 0   | 0        | 0      | 0 | 1200  | 1     | 1       | 393   |
| 394        | 0     | 0             | 0     | 0                 | 0 | 0 | 0                  | 0 | 0   | 0        | 0      | 0 | 1200  | 1     | 1       | 394   |
| 395        | 0     | 0             | 0     | 0                 | 0 | 0 | 0                  | 0 | 0   | 0        | 0      | 0 | 1200  | 1     | 1       | 395   |
| 396        | 0     | 0             | 0     | 0                 | 0 | 0 | 0                  | 0 | 0   | 0        | 0      | 0 | 1200  | 1     | 1       | 396   |
| 397        | 0     | 0             | 0     | 0                 | 0 | 0 | 0                  | 0 | 0   | 0        | 0      | 0 | 1200  | 1     | 1       | 397   |
| 398        | 0     | 0             | 0     | 0                 | 0 | 0 | 0                  | 0 | 0   | 0        | 0      | 0 | 1200  | 1     | 1       | 398   |
| 399        | 0     | 0             | 0     | 0                 | 0 | 0 | 0                  | 0 | 0   | 0        | 0      | 0 | 1200  | 1     | 1       | 399   |
| 400        | 0     | 0             | 0     | 0                 | 0 | 0 | 0                  | 0 | 0   | 0        | 0      | 0 | 1200  | 1     | 1       | 400   |

| SINGLE COL | COL & | FREQUENCIES FOR USPEW2002-01NII |   |   |   |   |   | (COLS. 401-600 ) |   |   |   |   | /     | NCARDS | 1201    |     |  |  |
|------------|-------|---------------------------------|---|---|---|---|---|------------------|---|---|---|---|-------|--------|---------|-----|--|--|
| COL        |       | -                               | 0 | 1 | 2 | 3 | 4 | 5                | 6 | 7 | 8 | 9 | BLANK | OTHER  | NONBLNK | COL |  |  |
| 401        | 0     | 0                               | 0 | 0 | 0 | 0 | 0 | 0                | 0 | 0 | 0 | 0 | 1201  | 0      | 0       | 401 |  |  |
| 402        | 0     | 0                               | 0 | 0 | 0 | 0 | 0 | 0                | 0 | 0 | 0 | 0 | 1200  | 1      | 1       | 402 |  |  |
| 403        | 0     | 0                               | 0 | 0 | 0 | 0 | 0 | 0                | 0 | 0 | 0 | 0 | 1200  | 1      | 1       | 403 |  |  |
| 404        | 0     | 0                               | 0 | 0 | 0 | 0 | 0 | 0                | 0 | 0 | 0 | 0 | 1200  | 1      | 1       | 404 |  |  |
| 405        | 0     | 0                               | 0 | 0 | 0 | 0 | 0 | 0                | 0 | 0 | 0 | 0 | 1200  | 1      | 1       | 405 |  |  |
| 406        | 0     | 0                               | 0 | 0 | 0 | 0 | 0 | 0                | 0 | 0 | 0 | 0 | 1200  | 1      | 1       | 406 |  |  |
| 407        | 0     | 0                               | 0 | 0 | 0 | 0 | 0 | 0                | 0 | 0 | 0 | 0 | 1200  | 1      | 1       | 407 |  |  |
| 408        | 0     | 0                               | 0 | 0 | 0 | 0 | 0 | 0                | 0 | 0 | 0 | 0 | 1200  | 1      | 1       | 408 |  |  |
| 409        | 0     | 0                               | 0 | 0 | 0 | 0 | 0 | 0                | 0 | 0 | 0 | 0 | 1201  | 0      | 0       | 409 |  |  |
| 410        | 0     | 0                               | 0 | 0 | 0 | 0 | 0 | 0                | 0 | 0 | 0 | 0 | 1201  | 0      | 0       | 410 |  |  |
| 411        | 0     | 0                               | 0 | 0 | 0 | 0 | 0 | 0                | 0 | 0 | 0 | 0 | 1201  | 0      | 0       | 411 |  |  |
| 412        | 0     | 0                               | 0 | 0 | 0 | 0 | 0 | 0                | 0 | 0 | 0 | 0 | 1201  | 0      | 0       | 412 |  |  |
| 413        | 0     | 0                               | 0 | 0 | 0 | 0 | 0 | 0                | 0 | 0 | 0 | 0 | 1201  | 0      | 0       | 413 |  |  |
| 414        | 0     | 0                               | 0 | 0 | 0 | 0 | 0 | 0                | 0 | 0 | 0 | 0 | 1201  | 0      | 0       | 414 |  |  |
| 415        | 0     | 0                               | 0 | 0 | 0 | 0 | 0 | 0                | 0 | 0 | 0 | 0 | 1201  | 0      | 0       | 415 |  |  |
| 416        | 0     | 0                               | 0 | 0 | 0 | 0 | 0 | 0                | 0 | 0 | 0 | 0 | 1201  | 0      | 0       | 416 |  |  |
| 417        | 0     | 0                               | 0 | 0 | 0 | 0 | 0 | 0                | 0 | 0 | 0 | 0 | 1201  | 0      | 0       | 417 |  |  |
| 418        | 0     | 0                               | 0 | 0 | 0 | 0 | 0 | 0                | 0 | 0 | 0 | 0 | 1201  | 0      | 0       | 418 |  |  |
| 419        | 0     | 0                               | 0 | 0 | 0 | 0 | 0 | 0                | 0 | 0 | 0 | 0 | 1201  | 0      | 0       | 419 |  |  |
| 420        | 0     | 0                               | 0 | 0 | 0 | 0 | 0 | 0                | 0 | 0 | 0 | 0 | 1201  | 0      | 0       | 420 |  |  |
| 421        | 0     | 0                               | 0 | 0 | 0 | 0 | 0 | 0                | 0 | 0 | 0 | 0 | 1201  | 0      | 0       | 421 |  |  |
| 422        | 0     | 0                               | 0 | 0 | 0 | 0 | 0 | 0                | 0 | 0 | 0 | 0 | 1201  | 0      | 0       | 422 |  |  |
| 423        | 0     | 0                               | 0 | 0 | 0 | 0 | 0 | 0                | 0 | 0 | 0 | 0 | 1201  | 0      | 0       | 423 |  |  |
| 424        | 0     | 0                               | 0 | 0 | 0 | 0 | 0 | 0                | 0 | 0 | 0 | 0 | 1201  | 0      | 0       | 424 |  |  |
| 425        | 0     | 0                               | 0 | 0 | 0 | 0 | 0 | 0                | 0 | 0 | 0 | 0 | 1201  | 0      | 0       | 425 |  |  |
| 426        | 0     | 0                               | 0 | 0 | 0 | 0 | 0 | 0                | 0 | 0 | 0 | 0 | 1201  | 0      | 0       | 426 |  |  |
| 427        | 0     | 0                               | 0 | 0 | 0 | 0 | 0 | 0                | 0 | 0 | 0 | 0 | 1201  | 0      | 0       | 427 |  |  |
| 428        | 0     | 0                               | 0 | 0 | 0 | 0 | 0 | 0                | 0 | 0 | 0 | 0 | 1201  | 0      | 0       | 428 |  |  |
| 429        | 0     | 0                               | 0 | 0 | 0 | 0 | 0 | 0                | 0 | 0 | 0 | 0 | 1201  | 0      | 0       | 429 |  |  |
| 430        | 0     | 0                               | 0 | 0 | 0 | 0 | 0 | 0                | 0 | 0 | 0 | 0 | 1201  | 0      | 0       | 430 |  |  |
| 431        | 0     | 0                               | 0 | 0 | 0 | 0 | 0 | 0                | 0 | 0 | 0 | 0 | 1201  | 0      | 0       | 431 |  |  |
| 432        | 0     | 0                               | 0 | 0 | 0 | 0 | 0 | 0                | 0 | 0 | 0 | 0 | 1201  | 0      | 0       | 432 |  |  |
| 433        | 0     | 0                               | 0 | 0 | 0 | 0 | 0 | 0                | 0 | 0 | 0 | 0 | 1201  | 0      | 0       | 433 |  |  |
| 434        | 0     | 0                               | 0 | 0 | 0 | 0 | 0 | 0                | 0 | 0 | 0 | 0 | 1201  | 0      | 0       | 434 |  |  |
| 435        | 0     | 0                               | 0 | 0 | 0 | 0 | 0 | 0                | 0 | 0 | 0 | 0 | 1201  | 0      | 0       | 435 |  |  |
| 436        | 0     | 0                               | 0 | 0 | 0 | 0 | 0 | 0                | 0 | 0 | 0 | 0 | 1201  | 0      | 0       | 436 |  |  |
| 437        | 0     | 0                               | 0 | 0 | 0 | 0 | 0 | 0                | 0 | 0 | 0 | 0 | 1201  | 0      | 0       | 437 |  |  |
| 438        | 0     | 0                               | 0 | 0 | 0 | 0 | 0 | 0                | 0 | 0 | 0 | 0 | 1201  | 0      | 0       | 438 |  |  |
| 439        | 0     | 0                               | 0 | 0 | 0 | 0 | 0 | 0                | 0 | 0 | 0 | 0 | 1201  | 0      | 0       | 439 |  |  |
| 440        | 0     | 0                               | 0 | 0 | 0 | 0 | 0 | 0                | 0 | 0 | 0 | 0 | 1201  | 0      | 0       | 440 |  |  |
| 441        | 0     | 0                               | 0 | 0 | 0 | 0 | 0 | 0                | 0 | 0 | 0 | 0 | 1201  | 0      | 0       | 441 |  |  |
| 442        | 0     | 0                               | 0 | 0 | 0 | 0 | 0 | 0                | 0 | 0 | 0 | 0 | 1201  | 0      | 0       | 442 |  |  |
| 443        | 0     | 0                               | 0 | 0 | 0 | 0 | 0 | 0                | 0 | 0 | 0 | 0 | 1201  | 0      | 0       | 443 |  |  |
| 444        | 0     | 0                               | 0 | 0 | 0 | 0 | 0 | 0                | 0 | 0 | 0 | 0 | 1201  | 0      | 0       | 444 |  |  |
| 445        | 0     | 0                               | 0 | 0 | 0 | 0 | 0 | 0                | 0 | 0 | 0 | 0 | 1201  | 0      | 0       | 445 |  |  |
| 446        | 0     | 0                               | 0 | 0 | 0 | 0 | 0 | 0                | 0 | 0 | 0 | 0 | 1201  | 0      | 0       | 446 |  |  |
| 447        | 0     | 0                               | 0 | 0 | 0 | 0 | 0 | 0                | 0 | 0 | 0 | 0 | 1201  | 0      | 0       | 447 |  |  |
| 448        | 0     | 0                               | 0 | 0 | 0 | 0 | 0 | 0                | 0 | 0 | 0 | 0 | 1201  | 0      | 0       | 448 |  |  |
| 449        | 0     | 0                               | 0 | 0 | 0 | 0 | 0 | 0                | 0 | 0 | 0 | 0 | 1201  | 0      | 0       | 449 |  |  |
| 450        | 0     | 0                               | 0 | 0 | 0 | 0 | 0 | 0                | 0 | 0 | 0 | 0 | 1201  | 0      | 0       | 450 |  |  |
| 451        | 0     | 0                               | 0 | 0 | 0 | 0 | 0 | 0                | 0 | 0 | 0 | 0 | 1201  | 0      | 0       | 451 |  |  |
| 452        | 0     | 0                               | 0 | 0 | 0 | 0 | 0 | 0                | 0 | 0 | 0 | 0 | 1201  | 0      | 0       | 452 |  |  |
| 453        | 0     | 0                               | 0 | 0 | 0 | 0 | 0 | 0                | 0 | 0 | 0 | 0 | 1201  | 0      | 0       | 453 |  |  |
| 454        | 0     | 0                               | 0 | 0 | 0 | 0 | 0 | 0                | 0 | 0 | 0 | 0 | 1201  | 0      | 0       | 454 |  |  |
| 455        | 0     | 0                               | 0 | 0 | 0 | 0 | 0 | 0                | 0 | 0 | 0 | 0 | 1201  | 0      | 0       | 455 |  |  |
| 456        | 0     | 0                               | 0 | 0 | 0 | 0 | 0 | 0                | 0 | 0 | 0 | 0 | 1201  | 0      | 0       | 456 |  |  |
| 457        | 0     | 0                               | 0 | 0 | 0 | 0 | 0 | 0                | 0 | 0 | 0 | 0 | 1201  | 0      | 0       | 457 |  |  |
| 458        | 0     | 0                               | 0 | 0 | 0 | 0 | 0 | 0                | 0 | 0 | 0 | 0 | 1201  | 0      | 0       | 458 |  |  |
| 459        | 0     | 0                               | 0 | 0 | 0 | 0 | 0 | 0                | 0 | 0 | 0 | 0 | 1201  | 0      | 0       | 459 |  |  |
| 460        | 0     | 0                               | 0 | 0 | 0 | 0 | 0 | 0                | 0 | 0 | 0 | 0 | 1201  | 0      | 0       | 460 |  |  |
| 461        | 0     | 0                               | 0 | 0 | 0 | 0 | 0 | 0                | 0 | 0 | 0 | 0 | 1201  | 0      | 0       | 461 |  |  |
| 462        | 0     | 0                               | 0 | 0 | 0 | 0 | 0 | 0                | 0 | 0 | 0 | 0 | 1201  | 0      | 0       | 462 |  |  |
| 463        | 0     | 0                               | 0 | 0 | 0 | 0 | 0 | 0                | 0 | 0 | 0 | 0 | 1201  | 0      | 0       | 463 |  |  |
| 464        | 0     | 0                               | 0 | 0 | 0 | 0 | 0 | 0                | 0 | 0 | 0 | 0 | 1201  | 0      | 0       | 464 |  |  |
| 465        | 0     | 0                               | 0 | 0 | 0 | 0 | 0 | 0                | 0 | 0 | 0 | 0 | 1201  | 0      | 0       | 465 |  |  |
| 466        | 0     | 0                               | 0 | 0 | 0 | 0 | 0 | 0                | 0 | 0 | 0 | 0 | 1201  | 0      | 0       | 466 |  |  |
| 467        | 0     | 0                               | 0 | 0 | 0 | 0 | 0 | 0                | 0 | 0 | 0 | 0 | 1201  | 0      | 0       | 467 |  |  |
| 468        | 0     | 0                               | 0 | 0 | 0 | 0 | 0 | 0                | 0 | 0 | 0 | 0 | 1201  | 0      | 0       | 468 |  |  |
| 469        | 0     | 0                               | 0 | 0 | 0 | 0 | 0 | 0                | 0 | 0 | 0 | 0 | 1201  | 0      | 0       | 469 |  |  |
| 470        | 0     | 0                               | 0 | 0 | 0 | 0 | 0 | 0                | 0 | 0 | 0 | 0 | 1201  | 0      | 0       | 470 |  |  |
| 471        | 0     | 0                               | 0 | 0 | 0 | 0 | 0 | 0                | 0 | 0 | 0 | 0 | 1201  | 0      | 0       | 471 |  |  |
| 472        | 0     | 0                               | 0 | 0 | 0 | 0 | 0 | 0                | 0 | 0 | 0 | 0 | 1201  | 0      | 0       | 472 |  |  |
| 473        | 0     | 0                               | 0 | 0 | 0 | 0 | 0 | 0                | 0 | 0 | 0 | 0 | 1201  | 0      | 0       | 473 |  |  |
| 474        | 0     | 0                               | 0 | 0 | 0 | 0 | 0 | 0                | 0 | 0 | 0 | 0 | 1201  | 0      | 0       | 474 |  |  |
| 475        | 0     | 0                               | 0 | 0 | 0 | 0 | 0 | 0                | 0 | 0 | 0 | 0 | 1201  | 0      | 0       | 475 |  |  |
| 476        | 0     | 0                               | 0 | 0 | 0 | 0 | 0 | 0                | 0 | 0 | 0 | 0 | 1201  | 0      | 0       | 476 |  |  |
| 477        | 0     | 0                               | 0 | 0 | 0 | 0 | 0 | 0                | 0 | 0 | 0 | 0 | 1201  | 0      | 0       | 477 |  |  |
| 478        | 0     | 0                               | 0 | 0 | 0 | 0 | 0 | 0                | 0 | 0 | 0 | 0 | 1201  | 0      | 0       | 478 |  |  |
| 479        | 0     | 0                               | 0 | 0 | 0 | 0 | 0 | 0                | 0 | 0 | 0 | 0 | 1201  | 0      | 0       | 479 |  |  |
| 480        | 0     | 0                               | 0 | 0 | 0 | 0 | 0 | 0                | 0 | 0 | 0 | 0 | 1201  | 0      | 0       | 480 |  |  |
| 481        | 0     | 0                               | 0 | 0 | 0 | 0 | 0 | 0                | 0 | 0 | 0 | 0 | 1201  | 0      | 0       | 481 |  |  |

## SINGLE COL FREQUENCIES FOR USPEW2002-01NII (COLS. 401-600 ) / NCARDS 1201

| COL | & | - | 0 | 1 | 2 | 3 | 4 | 5 | 6 | 7 | 8 | 9 | BLANK | OTHER | NONBLNK | COL |
|-----|---|---|---|---|---|---|---|---|---|---|---|---|-------|-------|---------|-----|
| 482 | 0 | 0 | 0 | 0 | 0 | 0 | 0 | 0 | 0 | 0 | 0 | 0 | 1201  | 0     | 0       | 482 |
| 483 | 0 | 0 | 0 | 0 | 0 | 0 | 0 | 0 | 0 | 0 | 0 | 0 | 1201  | 0     | 0       | 483 |
| 484 | 0 | 0 | 0 | 0 | 0 | 0 | 0 | 0 | 0 | 0 | 0 | 0 | 1201  | 0     | 0       | 484 |
| 485 | 0 | 0 | 0 | 0 | 0 | 0 | 0 | 0 | 0 | 0 | 0 | 0 | 1201  | 0     | 0       | 485 |
| 486 | 0 | 0 | 0 | 0 | 0 | 0 | 0 | 0 | 0 | 0 | 0 | 0 | 1201  | 0     | 0       | 486 |
| 487 | 0 | 0 | 0 | 0 | 0 | 0 | 0 | 0 | 0 | 0 | 0 | 0 | 1201  | 0     | 0       | 487 |
| 488 | 0 | 0 | 0 | 0 | 0 | 0 | 0 | 0 | 0 | 0 | 0 | 0 | 1201  | 0     | 0       | 488 |
| 489 | 0 | 0 | 0 | 0 | 0 | 0 | 0 | 0 | 0 | 0 | 0 | 0 | 1201  | 0     | 0       | 489 |
| 490 | 0 | 0 | 0 | 0 | 0 | 0 | 0 | 0 | 0 | 0 | 0 | 0 | 1201  | 0     | 0       | 490 |
| 491 | 0 | 0 | 0 | 0 | 0 | 0 | 0 | 0 | 0 | 0 | 0 | 0 | 1201  | 0     | 0       | 491 |
| 492 | 0 | 0 | 0 | 0 | 0 | 0 | 0 | 0 | 0 | 0 | 0 | 0 | 1201  | 0     | 0       | 492 |
| 493 | 0 | 0 | 0 | 0 | 0 | 0 | 0 | 0 | 0 | 0 | 0 | 0 | 1201  | 0     | 0       | 493 |
| 494 | 0 | 0 | 0 | 0 | 0 | 0 | 0 | 0 | 0 | 0 | 0 | 0 | 1201  | 0     | 0       | 494 |
| 495 | 0 | 0 | 0 | 0 | 0 | 0 | 0 | 0 | 0 | 0 | 0 | 0 | 1201  | 0     | 0       | 495 |
| 496 | 0 | 0 | 0 | 0 | 0 | 0 | 0 | 0 | 0 | 0 | 0 | 0 | 1201  | 0     | 0       | 496 |
| 497 | 0 | 0 | 0 | 0 | 0 | 0 | 0 | 0 | 0 | 0 | 0 | 0 | 1201  | 0     | 0       | 497 |
| 498 | 0 | 0 | 0 | 0 | 0 | 0 | 0 | 0 | 0 | 0 | 0 | 0 | 1201  | 0     | 0       | 498 |
| 499 | 0 | 0 | 0 | 0 | 0 | 0 | 0 | 0 | 0 | 0 | 0 | 0 | 1201  | 0     | 0       | 499 |
| 500 | 0 | 0 | 0 | 0 | 0 | 0 | 0 | 0 | 0 | 0 | 0 | 0 | 1201  | 0     | 0       | 500 |
| 501 | 0 | 0 | 0 | 0 | 0 | 0 | 0 | 0 | 0 | 0 | 0 | 0 | 1201  | 0     | 0       | 501 |
| 502 | 0 | 0 | 0 | 0 | 0 | 0 | 0 | 0 | 0 | 0 | 0 | 0 | 1201  | 0     | 0       | 502 |
| 503 | 0 | 0 | 0 | 0 | 0 | 0 | 0 | 0 | 0 | 0 | 0 | 0 | 1201  | 0     | 0       | 503 |
| 504 | 0 | 0 | 0 | 0 | 0 | 0 | 0 | 0 | 0 | 0 | 0 | 0 | 1201  | 0     | 0       | 504 |
| 505 | 0 | 0 | 0 | 0 | 0 | 0 | 0 | 0 | 0 | 0 | 0 | 0 | 1201  | 0     | 0       | 505 |
| 506 | 0 | 0 | 0 | 0 | 0 | 0 | 0 | 0 | 0 | 0 | 0 | 0 | 1201  | 0     | 0       | 506 |
| 507 | 0 | 0 | 0 | 0 | 0 | 0 | 0 | 0 | 0 | 0 | 0 | 0 | 1201  | 0     | 0       | 507 |
| 508 | 0 | 0 | 0 | 0 | 0 | 0 | 0 | 0 | 0 | 0 | 0 | 0 | 1201  | 0     | 0       | 508 |
| 509 | 0 | 0 | 0 | 0 | 0 | 0 | 0 | 0 | 0 | 0 | 0 | 0 | 1201  | 0     | 0       | 509 |
| 510 | 0 | 0 | 0 | 0 | 0 | 0 | 0 | 0 | 0 | 0 | 0 | 0 | 1201  | 0     | 0       | 510 |
| 511 | 0 | 0 | 0 | 0 | 0 | 0 | 0 | 0 | 0 | 0 | 0 | 0 | 1201  | 0     | 0       | 511 |
| 512 | 0 | 0 | 0 | 0 | 0 | 0 | 0 | 0 | 0 | 0 | 0 | 0 | 1201  | 0     | 0       | 512 |
| 513 | 0 | 0 | 0 | 0 | 0 | 0 | 0 | 0 | 0 | 0 | 0 | 0 | 1201  | 0     | 0       | 513 |
| 514 | 0 | 0 | 0 | 0 | 0 | 0 | 0 | 0 | 0 | 0 | 0 | 0 | 1201  | 0     | 0       | 514 |
| 515 | 0 | 0 | 0 | 0 | 0 | 0 | 0 | 0 | 0 | 0 | 0 | 0 | 1201  | 0     | 0       | 515 |
| 516 | 0 | 0 | 0 | 0 | 0 | 0 | 0 | 0 | 0 | 0 | 0 | 0 | 1201  | 0     | 0       | 516 |
| 517 | 0 | 0 | 0 | 0 | 0 | 0 | 0 | 0 | 0 | 0 | 0 | 0 | 1201  | 0     | 0       | 517 |
| 518 | 0 | 0 | 0 | 0 | 0 | 0 | 0 | 0 | 0 | 0 | 0 | 0 | 1201  | 0     | 0       | 518 |
| 519 | 0 | 0 | 0 | 0 | 0 | 0 | 0 | 0 | 0 | 0 | 0 | 0 | 1201  | 0     | 0       | 519 |
| 520 | 0 | 0 | 0 | 0 | 0 | 0 | 0 | 0 | 0 | 0 | 0 | 0 | 1201  | 0     | 0       | 520 |
| 521 | 0 | 0 | 0 | 0 | 0 | 0 | 0 | 0 | 0 | 0 | 0 | 0 | 1201  | 0     | 0       | 521 |
| 522 | 0 | 0 | 0 | 0 | 0 | 0 | 0 | 0 | 0 | 0 | 0 | 0 | 1201  | 0     | 0       | 522 |
| 523 | 0 | 0 | 0 | 0 | 0 | 0 | 0 | 0 | 0 | 0 | 0 | 0 | 1201  | 0     | 0       | 523 |
| 524 | 0 | 0 | 0 | 0 | 0 | 0 | 0 | 0 | 0 | 0 | 0 | 0 | 1201  | 0     | 0       | 524 |
| 525 | 0 | 0 | 0 | 0 | 0 | 0 | 0 | 0 | 0 | 0 | 0 | 0 | 1201  | 0     | 0       | 525 |
| 526 | 0 | 0 | 0 | 0 | 0 | 0 | 0 | 0 | 0 | 0 | 0 | 0 | 1201  | 0     | 0       | 526 |
| 527 | 0 | 0 | 0 | 0 | 0 | 0 | 0 | 0 | 0 | 0 | 0 | 0 | 1201  | 0     | 0       | 527 |
| 528 | 0 | 0 | 0 | 0 | 0 | 0 | 0 | 0 | 0 | 0 | 0 | 0 | 1201  | 0     | 0       | 528 |
| 529 | 0 | 0 | 0 | 0 | 0 | 0 | 0 | 0 | 0 | 0 | 0 | 0 | 1201  | 0     | 0       | 529 |
| 530 | 0 | 0 | 0 | 0 | 0 | 0 | 0 | 0 | 0 | 0 | 0 | 0 | 1201  | 0     | 0       | 530 |
| 531 | 0 | 0 | 0 | 0 | 0 | 0 | 0 | 0 | 0 | 0 | 0 | 0 | 1201  | 0     | 0       | 531 |
| 532 | 0 | 0 | 0 | 0 | 0 | 0 | 0 | 0 | 0 | 0 | 0 | 0 | 1201  | 0     | 0       | 532 |
| 533 | 0 | 0 | 0 | 0 | 0 | 0 | 0 | 0 | 0 | 0 | 0 | 0 | 1201  | 0     | 0       | 533 |
| 534 | 0 | 0 | 0 | 0 | 0 | 0 | 0 | 0 | 0 | 0 | 0 | 0 | 1201  | 0     | 0       | 534 |
| 535 | 0 | 0 | 0 | 0 | 0 | 0 | 0 | 0 | 0 | 0 | 0 | 0 | 1201  | 0     | 0       | 535 |
| 536 | 0 | 0 | 0 | 0 | 0 | 0 | 0 | 0 | 0 | 0 | 0 | 0 | 1201  | 0     | 0       | 536 |
| 537 | 0 | 0 | 0 | 0 | 0 | 0 | 0 | 0 | 0 | 0 | 0 | 0 | 1201  | 0     | 0       | 537 |
| 538 | 0 | 0 | 0 | 0 | 0 | 0 | 0 | 0 | 0 | 0 | 0 | 0 | 1201  | 0     | 0       | 538 |
| 539 | 0 | 0 | 0 | 0 | 0 | 0 | 0 | 0 | 0 | 0 | 0 | 0 | 1201  | 0     | 0       | 539 |
| 540 | 0 | 0 | 0 | 0 | 0 | 0 | 0 | 0 | 0 | 0 | 0 | 0 | 1201  | 0     | 0       | 540 |
| 541 | 0 | 0 | 0 | 0 | 0 | 0 | 0 | 0 | 0 | 0 | 0 | 0 | 1201  | 0     | 0       | 541 |
| 542 | 0 | 0 | 0 | 0 | 0 | 0 | 0 | 0 | 0 | 0 | 0 | 0 | 1201  | 0     | 0       | 542 |
| 543 | 0 | 0 | 0 | 0 | 0 | 0 | 0 | 0 | 0 | 0 | 0 | 0 | 1201  | 0     | 0       | 543 |
| 544 | 0 | 0 | 0 | 0 | 0 | 0 | 0 | 0 | 0 | 0 | 0 | 0 | 1201  | 0     | 0       | 544 |
| 545 | 0 | 0 | 0 | 0 | 0 | 0 | 0 | 0 | 0 | 0 | 0 | 0 | 1201  | 0     | 0       | 545 |
| 546 | 0 | 0 | 0 | 0 | 0 | 0 | 0 | 0 | 0 | 0 | 0 | 0 | 1201  | 0     | 0       | 546 |
| 547 | 0 | 0 | 0 | 0 | 0 | 0 | 0 | 0 | 0 | 0 | 0 | 0 | 1201  | 0     | 0       | 547 |
| 548 | 0 | 0 | 0 | 0 | 0 | 0 | 0 | 0 | 0 | 0 | 0 | 0 | 1201  | 0     | 0       | 548 |
| 549 | 0 | 0 | 0 | 0 | 0 | 0 | 0 | 0 | 0 | 0 | 0 | 0 | 1201  | 0     | 0       | 549 |
| 550 | 0 | 0 | 0 | 0 | 0 | 0 | 0 | 0 | 0 | 0 | 0 | 0 | 1201  | 0     | 0       | 550 |
| 551 | 0 | 0 | 0 | 0 | 0 | 0 | 0 | 0 | 0 | 0 | 0 | 0 | 1201  | 0     | 0       | 551 |
| 552 | 0 | 0 | 0 | 0 | 0 | 0 | 0 | 0 | 0 | 0 | 0 | 0 | 1201  | 0     | 0       | 552 |
| 553 | 0 | 0 | 0 | 0 | 0 | 0 | 0 | 0 | 0 | 0 | 0 | 0 | 1201  | 0     | 0       | 553 |
| 554 | 0 | 0 | 0 | 0 | 0 | 0 | 0 | 0 | 0 | 0 | 0 | 0 | 1201  | 0     | 0       | 554 |
| 555 | 0 | 0 | 0 | 0 | 0 | 0 | 0 | 0 | 0 | 0 | 0 | 0 | 1201  | 0     | 0       | 555 |
| 556 | 0 | 0 | 0 | 0 | 0 | 0 | 0 | 0 | 0 | 0 | 0 | 0 | 1201  | 0     | 0       | 556 |
| 557 | 0 | 0 | 0 | 0 | 0 | 0 | 0 | 0 | 0 | 0 | 0 | 0 | 1201  | 0     | 0       | 557 |
| 558 | 0 | 0 | 0 | 0 | 0 | 0 | 0 | 0 | 0 | 0 | 0 | 0 | 1201  | 0     | 0       | 558 |
| 559 | 0 | 0 | 0 | 0 | 0 | 0 | 0 | 0 | 0 | 0 | 0 | 0 | 1201  | 0     | 0       | 559 |
| 560 | 0 | 0 | 0 | 0 | 0 | 0 | 0 | 0 | 0 | 0 | 0 | 0 | 1201  | 0     | 0       | 560 |
| 561 | 0 | 0 | 0 | 0 | 0 | 0 | 0 | 0 | 0 | 0 | 0 | 0 | 1201  | 0     | 0       | 561 |
| 562 | 0 | 0 | 0 | 0 | 0 | 0 | 0 | 0 | 0 | 0 | 0 | 0 | 1201  | 0     | 0       | 562 |

| SINGLE COL | COL & | FREQUENCIES - | FOR 0 | USPEW2002-01NII 1 | 2    | 3   | (COLS. 401-600 ) 4 | 5   | / 6 | NCARDS 7 | 1201 8 | 9   | BLANK | OTHER | NONBLNK | COL |
|------------|-------|---------------|-------|-------------------|------|-----|--------------------|-----|-----|----------|--------|-----|-------|-------|---------|-----|
| 563        | 0     | 0             | 0     | 0                 | 0    | 0   | 0                  | 0   | 0   | 0        | 0      | 0   | 1201  | 0     | 0       | 563 |
| 564        | 0     | 0             | 0     | 0                 | 0    | 0   | 0                  | 0   | 0   | 0        | 0      | 0   | 1201  | 0     | 0       | 564 |
| 565        | 0     | 0             | 0     | 0                 | 0    | 0   | 0                  | 0   | 0   | 0        | 0      | 0   | 1201  | 0     | 0       | 565 |
| 566        | 0     | 0             | 0     | 0                 | 0    | 0   | 0                  | 0   | 0   | 0        | 0      | 0   | 1201  | 0     | 0       | 566 |
| 567        | 0     | 0             | 0     | 0                 | 399  | 594 | 0                  | 0   | 0   | 0        | 0      | 63  | 145   | 0     | 1056    | 567 |
| 568        | 0     | 0             | 0     | 68                | 116  | 135 | 155                | 148 | 193 | 129      | 120    | 137 | 0     | 0     | 1201    | 568 |
| 569        | 0     | 0             | 0     | 967               | 230  | 0   | 0                  | 0   | 0   | 0        | 0      | 4   | 0     | 0     | 1201    | 569 |
| 570        | 0     | 0             | 0     | 931               | 30   | 0   | 0                  | 0   | 0   | 0        | 0      | 6   | 234   | 0     | 967     | 570 |
| 571        | 0     | 0             | 0     | 378               | 360  | 381 | 45                 | 11  | 0   | 0        | 0      | 26  | 0     | 0     | 1201    | 571 |
| 572        | 0     | 0             | 0     | 180               | 133  | 0   | 0                  | 0   | 0   | 0        | 0      | 150 | 738   | 0     | 463     | 572 |
| 573        | 0     | 0             | 0     | 350               | 456  | 20  | 3                  | 12  | 7   | 303      | 3      | 47  | 0     | 0     | 1201    | 573 |
| 574        | 0     | 0             | 0     | 68                | 359  | 525 | 154                | 40  | 0   | 0        | 0      | 55  | 0     | 0     | 1201    | 574 |
| 575        | 0     | 0             | 0     | 845               | 309  | 39  | 0                  | 0   | 0   | 0        | 0      | 8   | 0     | 0     | 1201    | 575 |
| 576        | 0     | 0             | 0     | 659               | 141  | 396 | 0                  | 0   | 0   | 0        | 0      | 5   | 0     | 0     | 1201    | 576 |
| 577        | 0     | 0             | 0     | 381               | 69   | 213 | 0                  | 0   | 0   | 0        | 0      | 4   | 534   | 0     | 667     | 577 |
| 578        | 0     | 0             | 0     | 667               | 534  | 0   | 0                  | 0   | 0   | 0        | 0      | 0   | 0     | 0     | 1201    | 578 |
| 579        | 0     | 0             | 0     | 118               | 59   | 14  | 998                | 0   | 0   | 0        | 0      | 12  | 0     | 0     | 1201    | 579 |
| 580        | 0     | 0             | 0     | 235               | 252  | 462 | 243                | 0   | 0   | 0        | 0      | 9   | 0     | 0     | 1201    | 580 |
| 581        | 0     | 0             | 0     | 0                 | 0    | 0   | 0                  | 0   | 0   | 0        | 0      | 0   | 1     | 1200  | 1200    | 581 |
| 582        | 0     | 0             | 0     | 0                 | 0    | 0   | 0                  | 0   | 0   | 0        | 0      | 0   | 22    | 1179  | 1179    | 582 |
| 583        | 0     | 0             | 0     | 11                | 14   | 0   | 0                  | 0   | 0   | 0        | 0      | 0   | 1129  | 47    | 72      | 583 |
| 584        | 0     | 0             | 0     | 0                 | 0    | 0   | 0                  | 0   | 0   | 0        | 0      | 0   | 1197  | 4     | 4       | 584 |
| 585        | 0     | 0             | 0     | 0                 | 0    | 0   | 0                  | 0   | 0   | 0        | 0      | 0   | 1198  | 3     | 3       | 585 |
| 586        | 0     | 0             | 0     | 0                 | 0    | 0   | 0                  | 0   | 0   | 0        | 0      | 0   | 1200  | 1     | 1       | 586 |
| 587        | 0     | 0             | 0     | 0                 | 0    | 0   | 0                  | 0   | 0   | 0        | 0      | 0   | 1201  | 0     | 0       | 587 |
| 588        | 0     | 0             | 0     | 0                 | 0    | 0   | 0                  | 0   | 0   | 0        | 0      | 0   | 1201  | 0     | 0       | 588 |
| 589        | 0     | 0             | 0     | 0                 | 0    | 0   | 0                  | 0   | 0   | 0        | 0      | 0   | 1201  | 0     | 0       | 589 |
| 590        | 0     | 0             | 0     | 0                 | 0    | 0   | 0                  | 0   | 0   | 0        | 0      | 0   | 1201  | 0     | 0       | 590 |
| 591        | 0     | 0             | 1201  | 0                 | 0    | 0   | 0                  | 0   | 0   | 0        | 0      | 0   | 0     | 0     | 1201    | 591 |
| 592        | 0     | 0             | 0     | 0                 | 1201 | 0   | 0                  | 0   | 0   | 0        | 0      | 0   | 0     | 0     | 1201    | 592 |
| 593        | 0     | 0             | 1201  | 0                 | 0    | 0   | 0                  | 0   | 0   | 0        | 0      | 0   | 0     | 0     | 1201    | 593 |
| 594        | 0     | 0             | 0     | 1201              | 0    | 0   | 0                  | 0   | 0   | 0        | 0      | 0   | 0     | 0     | 1201    | 594 |
| 595        | 0     | 0             | 356   | 845               | 0    | 0   | 0                  | 0   | 0   | 0        | 0      | 0   | 0     | 0     | 1201    | 595 |
| 596        | 0     | 0             | 345   | 318               | 118  | 64  | 0                  | 0   | 0   | 0        | 0      | 356 | 0     | 0     | 1201    | 596 |
| 597        | 0     | 0             | 3     | 516               | 682  | 0   | 0                  | 0   | 0   | 0        | 0      | 0   | 0     | 0     | 1201    | 597 |
| 598        | 0     | 0             | 221   | 191               | 184  | 90  | 0                  | 0   | 13  | 76       | 193    | 233 | 0     | 0     | 1201    | 598 |
| 599        | 0     | 0             | 179   | 221               | 179  | 201 | 210                | 210 | 0   | 0        | 0      | 0   | 1     | 0     | 1200    | 599 |
| 600        | 0     | 0             | 132   | 110               | 129  | 133 | 111                | 134 | 106 | 126      | 118    | 101 | 1     | 0     | 1200    | 600 |



| SINGLE COL | COL & | FREQUENCIES - | FOR 0 | USPEW2002-01NII 1 | 2    | 3   | (COLS. 4 | 601-631 5 | ) / 6 | NCARDS 7 | 1201 8 | 9   | BLANK | OTHER | NONBLNK | COL |
|------------|-------|---------------|-------|-------------------|------|-----|----------|-----------|-------|----------|--------|-----|-------|-------|---------|-----|
| 601        | 0     | 0             | 193   | 204               | 177  | 211 | 203      | 211       | 0     | 0        | 0      | 0   | 2     | 0     | 1199    | 601 |
| 602        | 0     | 0             | 108   | 108               | 128  | 126 | 128      | 105       | 115   | 137      | 129    | 114 | 3     | 0     | 1198    | 602 |
| 603        | 0     | 0             | 0     | 0                 | 0    | 0   | 0        | 0         | 0     | 0        | 0      | 0   | 1201  | 0     | 0       | 603 |
| 604        | 0     | 0             | 0     | 0                 | 0    | 0   | 0        | 0         | 0     | 0        | 0      | 0   | 1201  | 0     | 0       | 604 |
| 605        | 0     | 3             | 0     | 676               | 522  | 0   | 0        | 0         | 0     | 0        | 0      | 0   | 0     | 0     | 1201    | 605 |
| 606        | 0     | 0             | 331   | 176               | 19   | 2   | 4        | 10        | 24    | 109      | 242    | 284 | 0     | 0     | 1201    | 606 |
| 607        | 0     | 0             | 178   | 221               | 178  | 201 | 210      | 210       | 0     | 1        | 0      | 2   | 0     | 0     | 1201    | 607 |
| 608        | 0     | 0             | 132   | 110               | 128  | 133 | 111      | 134       | 106   | 126      | 118    | 103 | 0     | 0     | 1201    | 608 |
| 609        | 0     | 0             | 193   | 204               | 177  | 211 | 203      | 210       | 0     | 1        | 1      | 1   | 0     | 0     | 1201    | 609 |
| 610        | 0     | 0             | 108   | 108               | 128  | 126 | 128      | 106       | 115   | 137      | 131    | 114 | 0     | 0     | 1201    | 610 |
| 611        | 0     | 0             | 0     | 0                 | 0    | 0   | 0        | 0         | 0     | 0        | 0      | 0   | 1201  | 0     | 0       | 611 |
| 612        | 0     | 0             | 0     | 0                 | 0    | 0   | 0        | 0         | 0     | 0        | 0      | 0   | 1201  | 0     | 0       | 612 |
| 613        | 0     | 0             | 1201  | 0                 | 0    | 0   | 0        | 0         | 0     | 0        | 0      | 0   | 0     | 0     | 1201    | 613 |
| 614        | 0     | 0             | 0     | 0                 | 1201 | 0   | 0        | 0         | 0     | 0        | 0      | 0   | 0     | 0     | 1201    | 614 |
| 615        | 0     | 0             | 1201  | 0                 | 0    | 0   | 0        | 0         | 0     | 0        | 0      | 0   | 0     | 0     | 1201    | 615 |
| 616        | 0     | 0             | 0     | 1201              | 0    | 0   | 0        | 0         | 0     | 0        | 0      | 0   | 0     | 0     | 1201    | 616 |
| 617        | 0     | 0             | 358   | 843               | 0    | 0   | 0        | 0         | 0     | 0        | 0      | 0   | 0     | 0     | 1201    | 617 |
| 618        | 0     | 0             | 344   | 317               | 118  | 64  | 0        | 0         | 0     | 0        | 0      | 358 | 0     | 0     | 1201    | 618 |
| 619        | 0     | 0             | 0     | 0                 | 0    | 0   | 0        | 0         | 0     | 0        | 0      | 0   | 1201  | 0     | 0       | 619 |
| 620        | 0     | 0             | 0     | 0                 | 0    | 0   | 0        | 0         | 0     | 0        | 0      | 0   | 1201  | 0     | 0       | 620 |
| 621        | 0     | 0             | 0     | 0                 | 0    | 0   | 0        | 0         | 0     | 0        | 0      | 0   | 1201  | 0     | 0       | 621 |
| 622        | 0     | 0             | 0     | 0                 | 0    | 0   | 0        | 0         | 0     | 0        | 0      | 0   | 1201  | 0     | 0       | 622 |
| 623        | 0     | 0             | 0     | 64                | 0    | 0   | 358      | 343       | 318   | 118      | 0      | 0   | 0     | 0     | 1201    | 623 |
| 624        | 0     | 0             | 0     | 0                 | 0    | 0   | 0        | 0         | 0     | 0        | 0      | 0   | 0     | 1201  | 1201    | 624 |
| 625        | 0     | 0             | 1201  | 0                 | 0    | 0   | 0        | 0         | 0     | 0        | 0      | 0   | 0     | 0     | 1201    | 625 |
| 626        | 0     | 0             | 1201  | 0                 | 0    | 0   | 0        | 0         | 0     | 0        | 0      | 0   | 0     | 0     | 1201    | 626 |
| 627        | 0     | 0             | 0     | 0                 | 0    | 0   | 0        | 0         | 0     | 0        | 0      | 0   | 1201  | 0     | 0       | 627 |
| 628        | 0     | 0             | 0     | 602               | 319  | 113 | 37       | 0         | 0     | 0        | 0      | 0   | 130   | 0     | 1071    | 628 |
| 629        | 0     | 0             | 0     | 0                 | 0    | 0   | 0        | 0         | 0     | 0        | 0      | 0   | 0     | 1201  | 1201    | 629 |
| 630        | 0     | 0             | 129   | 98                | 161  | 94  | 107      | 105       | 84    | 140      | 176    | 107 | 0     | 0     | 1201    | 630 |
| 631        | 0     | 0             | 179   | 109               | 100  | 109 | 121      | 119       | 100   | 101      | 112    | 151 | 0     | 0     | 1201    | 631 |

Data Locations, Questionnaire, and Hole-Punch  
Count (x-ray) for interview dates of January  
14-15, 2002, N = 406

| Variable | Rec | Start | End | Format |
|----------|-----|-------|-----|--------|
| RID      | 1   | 1     | 6   | F6.0   |
| BATCH    | 1   | 7     | 9   | A3     |
| INTDAT   | 1   | 10    | 15  | F6.0   |
| START    | 1   | 16    | 21  | F6.0   |
| STOP     | 1   | 22    | 27  | F6.0   |
| TIME     | 1   | 28    | 33  | F6.0   |
| INTID    | 1   | 34    | 43  | F10.0  |
| DISP     | 1   | 44    | 45  | F2.0   |
| SAMPTZ   | 1   | 46    | 46  | A1     |
| SAMPREP  | 1   | 47    | 49  | F3.0   |
| PHONTY   | 1   | 50    | 50  | F1.0   |
| USR      | 1   | 51    | 51  | A1     |
| PHONT2   | 1   | 52    | 52  | F1.0   |
| Q2A      | 1   | 53    | 53  | F1.0   |
| Q2B      | 1   | 54    | 54  | F1.0   |
| Q2C      | 1   | 55    | 55  | F1.0   |
| Q2D      | 1   | 56    | 56  | F1.0   |
| D1       | 1   | 57    | 57  | F1.0   |
| D2       | 1   | 58    | 59  | F2.0   |
| D3       | 1   | 60    | 60  | F1.0   |
| D4       | 1   | 61    | 61  | F1.0   |
| D5       | 1   | 62    | 62  | F1.0   |
| D8       | 1   | 63    | 64  | F2.0   |
| D10      | 1   | 65    | 65  | F1.0   |
| OTHRAC   | 1   | 66    | 137 | A72    |
| USR1     | 1   | 138   | 138 | F1.0   |
| CREGION  | 1   | 139   | 139 | F1.0   |
| RECAGE   | 1   | 140   | 140 | F1.0   |
| RECEDUC  | 1   | 141   | 141 | F1.0   |
| RACETHN  | 1   | 142   | 142 | F1.0   |
| WEIGHT   | 1   | 143   | 146 | F4.2   |

**PEW RESEARCH CENTER FOR THE PEOPLE & THE PRESS**  
**JANUARY 2002 NII OMNIBUS UPDATE**  
**C FINAL QUESTIONNAIRE C**

Q.2 Now I will read a list of some stories covered by news organizations this past month. As I read each item, tell me if you happened to follow this news story very closely, fairly closely, not too closely, or not at all closely? **[INSERT ITEM; ROTATE]**

- a. The ongoing investigation into the bankruptcy of the Enron corporation *{12-01 modified}*
- b. The U.S. military effort in Afghanistan *{1-02}*
- c. Reports about the condition of the U.S. economy *{1-02}*
- d. Tensions between India and Pakistan *{1-02}*

- 1 Very closely
- 2 Fairly closely
- 3 Not too closely
- 4 Not at all closely
- 9 Don=t know/Refused (**VOL.**)

D.1 [ENTER RESPONDENT'S SEX:]

- 1 Male
- 2 Female

D.2 What is your age?

- \_\_\_\_\_ years
- 97 97 or older
  - 99 Don't know/Refused [VOL.]

D.3 What is the last grade or class that you completed in school? [DO NOT READ]

- 1 None, or grade 1-8
- 2 High school incomplete (Grades 9-11)
- 3 High school graduate (Grade 12 or GED certificate)
- 4 Business, Technical, or vocational school AFTER high school
- 5 Some college, no 4-year degree
- 6 College graduate (B.S., B.A., or other 4-year degree)
- 7 Post-graduate training or professional schooling after college (e.g., toward a master's Degree or Ph.D.; law or medical school)
- 9 Don't know/Refused (VOL.)

D.4 Are you, yourself, of Hispanic origin or descent, such as Mexican, Puerto Rican, Cuban, or some other Spanish background?

- 1 Yes — **SEE INSTRUCTION**
- 2 No — **GO TO D.5**
- 9 Don't know/Refused (VOL.) — **GO TO D.5**

**[INTERVIEWER: IF RESPONDENT ANSWERED 1 'HISPANIC' IN D.4, ASK: Are you white Hispanic, black Hispanic, or some other race? IF NON-HISPANIC ASK:]**

D.5 What is your race? Are you white, black, Asian, or some other?

- 1 White
- 2 Black
- 3 Asian
- 4 Other or mixed race
- 9 Don't know/Refused **(VOL.)**

D.8 What is your religious preference — Protestant, Roman Catholic, Jewish, Mormon, or an orthodox church such as the Greek or Russian Orthodox Church?

- 1 Protestant (include Baptist, Episcopal, Jehovah's Witness, Lutheran, Methodist, Presbyterian, Episcopalian, Pentecostal, Church of Christ, etc.)
- 2 Roman Catholic
- 3 Jewish — **GO TO D.10**
- 4 Mormon (include Church of Jesus Christ of Latter Day Saints)
- 5 Orthodox Church (Greek or Russian)
- 6 Islam/Muslim — **GO TO D.10**
- 7 Other religion **[SPECIFY]**
- 8 No religion, not a believer, atheist, agnostic — **GO TO D.10**
- 9 Don't know/Refused **[VOL.]**

**[ASK ALL:]**

D.10 Last year, that is in 2001, what was your total family income from all sources, before taxes? Just stop me when I get to the right category. **[READ]**

- 1 Less than \$10,000
- 2 \$10,000 to under \$20,000
- 3 \$20,000 to under \$30,000
- 4 \$30,000 to under \$40,000
- 5 \$40,000 to under \$50,000
- 6 \$50,000 to under \$75,000
- 7 \$75,000 to under \$100,000
- 8 \$100,000 or more
- 9 **[DO NOT READ]** Don't know/Refused **(VOL.)**

| SINGLE COL | COL & | FREQUENCIES - | FOR 0 | USPEW2002-01NII_E 1 | 2   | 3   | (COLS. 1-146 ) 4 | 5   | 6  | / 7 | NCARDS 406 8 | 9  | BLANK | OTHER | NONBLNK | COL |    |
|------------|-------|---------------|-------|---------------------|-----|-----|------------------|-----|----|-----|--------------|----|-------|-------|---------|-----|----|
| 1          | 0     | 0             | 0     | 406                 | 0   | 0   | 0                | 0   | 0  | 0   | 0            | 0  | 0     | 0     | 0       | 406 | 1  |
| 2          | 0     | 0             | 180   | 226                 | 0   | 0   | 0                | 0   | 0  | 0   | 0            | 0  | 0     | 0     | 0       | 406 | 2  |
| 3          | 0     | 0             | 76    | 59                  | 65  | 26  | 0                | 0   | 0  | 15  | 91           | 74 | 0     | 0     | 0       | 406 | 3  |
| 4          | 0     | 0             | 45    | 39                  | 53  | 34  | 43               | 30  | 38 | 47  | 36           | 41 | 0     | 0     | 0       | 406 | 4  |
| 5          | 0     | 0             | 43    | 44                  | 47  | 40  | 46               | 35  | 39 | 42  | 38           | 32 | 0     | 0     | 0       | 406 | 5  |
| 6          | 0     | 0             | 37    | 36                  | 30  | 46  | 49               | 39  | 42 | 38  | 50           | 39 | 0     | 0     | 0       | 406 | 6  |
| 7          | 0     | 0             | 0     | 0                   | 0   | 0   | 0                | 0   | 0  | 0   | 0            | 0  | 0     | 406   | 0       | 406 | 7  |
| 8          | 0     | 0             | 0     | 205                 | 196 | 0   | 5                | 0   | 0  | 0   | 0            | 0  | 0     | 0     | 0       | 406 | 8  |
| 9          | 0     | 0             | 0     | 18                  | 3   | 45  | 20               | 13  | 4  | 1   | 0            | 0  | 0     | 302   | 0       | 406 | 9  |
| 10         | 0     | 0             | 0     | 0                   | 0   | 0   | 0                | 0   | 0  | 0   | 0            | 0  | 406   | 0     | 0       | 406 | 10 |
| 11         | 0     | 0             | 0     | 406                 | 0   | 0   | 0                | 0   | 0  | 0   | 0            | 0  | 0     | 0     | 0       | 406 | 11 |
| 12         | 0     | 0             | 0     | 406                 | 0   | 0   | 0                | 0   | 0  | 0   | 0            | 0  | 0     | 0     | 0       | 406 | 12 |
| 13         | 0     | 0             | 0     | 0                   | 0   | 0   | 210              | 196 | 0  | 0   | 0            | 0  | 0     | 0     | 0       | 406 | 13 |
| 14         | 0     | 0             | 406   | 0                   | 0   | 0   | 0                | 0   | 0  | 0   | 0            | 0  | 0     | 0     | 0       | 406 | 14 |
| 15         | 0     | 0             | 0     | 0                   | 406 | 0   | 0                | 0   | 0  | 0   | 0            | 0  | 0     | 0     | 0       | 406 | 15 |
| 16         | 0     | 0             | 0     | 270                 | 136 | 0   | 0                | 0   | 0  | 0   | 0            | 0  | 0     | 0     | 0       | 406 | 16 |
| 17         | 0     | 0             | 60    | 33                  | 21  | 22  | 0                | 1   | 47 | 77  | 80           | 65 | 0     | 0     | 0       | 406 | 17 |
| 18         | 0     | 0             | 83    | 66                  | 60  | 77  | 72               | 48  | 0  | 0   | 0            | 0  | 0     | 0     | 0       | 406 | 18 |
| 19         | 0     | 0             | 42    | 31                  | 42  | 47  | 34               | 46  | 49 | 46  | 36           | 33 | 0     | 0     | 0       | 406 | 19 |
| 20         | 0     | 0             | 65    | 62                  | 77  | 71  | 61               | 70  | 0  | 0   | 0            | 0  | 0     | 0     | 0       | 406 | 20 |
| 21         | 0     | 0             | 33    | 49                  | 41  | 45  | 29               | 39  | 40 | 48  | 40           | 42 | 0     | 0     | 0       | 406 | 21 |
| 22         | 0     | 0             | 0     | 267                 | 139 | 0   | 0                | 0   | 0  | 0   | 0            | 0  | 0     | 0     | 0       | 406 | 22 |
| 23         | 0     | 0             | 60    | 36                  | 19  | 24  | 0                | 1   | 47 | 74  | 77           | 68 | 0     | 0     | 0       | 406 | 23 |
| 24         | 0     | 0             | 68    | 67                  | 71  | 71  | 68               | 61  | 0  | 0   | 0            | 0  | 0     | 0     | 0       | 406 | 24 |
| 25         | 0     | 0             | 43    | 35                  | 40  | 46  | 34               | 36  | 46 | 44  | 40           | 42 | 0     | 0     | 0       | 406 | 25 |
| 26         | 0     | 0             | 62    | 61                  | 80  | 75  | 64               | 64  | 0  | 0   | 0            | 0  | 0     | 0     | 0       | 406 | 26 |
| 27         | 0     | 0             | 28    | 41                  | 31  | 43  | 32               | 30  | 53 | 58  | 46           | 44 | 0     | 0     | 0       | 406 | 27 |
| 28         | 0     | 0             | 0     | 0                   | 0   | 0   | 0                | 0   | 0  | 0   | 0            | 0  | 406   | 0     | 0       | 406 | 28 |
| 29         | 0     | 0             | 0     | 0                   | 0   | 0   | 0                | 0   | 0  | 0   | 0            | 0  | 406   | 0     | 0       | 406 | 29 |
| 30         | 0     | 0             | 0     | 0                   | 0   | 0   | 0                | 0   | 0  | 0   | 0            | 0  | 406   | 0     | 0       | 406 | 30 |
| 31         | 0     | 0             | 0     | 108                 | 229 | 52  | 11               | 4   | 1  | 1   | 0            | 0  | 0     | 0     | 0       | 406 | 31 |
| 32         | 0     | 0             | 49    | 37                  | 40  | 34  | 31               | 31  | 33 | 54  | 51           | 46 | 0     | 0     | 0       | 406 | 32 |
| 33         | 0     | 0             | 41    | 45                  | 38  | 48  | 37               | 40  | 40 | 43  | 33           | 41 | 0     | 0     | 0       | 406 | 33 |
| 34         | 0     | 0             | 0     | 0                   | 0   | 0   | 0                | 0   | 0  | 0   | 0            | 0  | 406   | 0     | 0       | 406 | 34 |
| 35         | 0     | 0             | 0     | 0                   | 0   | 0   | 0                | 0   | 0  | 0   | 0            | 0  | 406   | 0     | 0       | 406 | 35 |
| 36         | 0     | 0             | 0     | 0                   | 0   | 0   | 0                | 0   | 0  | 0   | 0            | 0  | 406   | 0     | 0       | 406 | 36 |
| 37         | 0     | 0             | 0     | 218                 | 0   | 0   | 0                | 0   | 0  | 0   | 0            | 0  | 188   | 0     | 218     | 406 | 37 |
| 38         | 0     | 0             | 218   | 0                   | 0   | 0   | 0                | 0   | 0  | 0   | 0            | 0  | 188   | 0     | 218     | 406 | 38 |
| 39         | 0     | 0             | 218   | 0                   | 0   | 0   | 0                | 0   | 0  | 0   | 0            | 0  | 188   | 0     | 218     | 406 | 39 |
| 40         | 0     | 0             | 0     | 246                 | 0   | 0   | 0                | 0   | 0  | 0   | 0            | 0  | 160   | 0     | 246     | 406 | 40 |
| 41         | 0     | 0             | 28    | 37                  | 43  | 115 | 38               | 14  | 17 | 0   | 0            | 74 | 40    | 0     | 366     | 406 | 41 |
| 42         | 0     | 0             | 36    | 52                  | 25  | 3   | 16               | 43  | 49 | 77  | 33           | 72 | 0     | 0     | 406     | 42  | 42 |
| 43         | 0     | 0             | 3     | 50                  | 103 | 9   | 18               | 55  | 46 | 17  | 27           | 78 | 0     | 0     | 406     | 43  | 43 |
| 44         | 0     | 0             | 0     | 0                   | 0   | 0   | 406              | 0   | 0  | 0   | 0            | 0  | 0     | 0     | 0       | 406 | 44 |
| 45         | 0     | 0             | 0     | 0                   | 0   | 406 | 0                | 0   | 0  | 0   | 0            | 0  | 0     | 0     | 0       | 406 | 45 |
| 46         | 0     | 0             | 0     | 0                   | 0   | 0   | 0                | 0   | 0  | 0   | 0            | 0  | 0     | 406   | 406     | 406 | 46 |
| 47         | 0     | 0             | 0     | 0                   | 0   | 0   | 0                | 0   | 0  | 0   | 0            | 0  | 406   | 0     | 0       | 406 | 47 |
| 48         | 0     | 0             | 0     | 140                 | 69  | 17  | 27               | 16  | 2  | 0   | 0            | 0  | 135   | 0     | 271     | 406 | 48 |
| 49         | 0     | 0             | 21    | 41                  | 36  | 39  | 40               | 45  | 46 | 53  | 39           | 46 | 0     | 0     | 0       | 406 | 49 |
| 50         | 0     | 0             | 116   | 142                 | 16  | 132 | 0                | 0   | 0  | 0   | 0            | 0  | 0     | 0     | 0       | 406 | 50 |
| 51         | 0     | 0             | 0     | 0                   | 0   | 0   | 0                | 0   | 0  | 0   | 0            | 0  | 0     | 406   | 406     | 406 | 51 |
| 52         | 0     | 0             | 116   | 142                 | 16  | 132 | 0                | 0   | 0  | 0   | 0            | 0  | 0     | 0     | 0       | 406 | 52 |
| 53         | 0     | 0             | 0     | 82                  | 108 | 82  | 126              | 0   | 0  | 0   | 0            | 8  | 0     | 0     | 0       | 406 | 53 |
| 54         | 0     | 0             | 0     | 203                 | 139 | 35  | 26               | 0   | 0  | 0   | 0            | 3  | 0     | 0     | 0       | 406 | 54 |
| 55         | 0     | 0             | 0     | 147                 | 170 | 46  | 39               | 0   | 0  | 0   | 0            | 4  | 0     | 0     | 0       | 406 | 55 |
| 56         | 0     | 0             | 0     | 95                  | 146 | 89  | 68               | 0   | 0  | 0   | 0            | 8  | 0     | 0     | 0       | 406 | 56 |
| 57         | 0     | 0             | 0     | 179                 | 227 | 0   | 0                | 0   | 0  | 0   | 0            | 0  | 0     | 0     | 0       | 406 | 57 |
| 58         | 0     | 0             | 0     | 19                  | 56  | 73  | 72               | 74  | 42 | 44  | 15           | 11 | 0     | 0     | 0       | 406 | 58 |
| 59         | 0     | 0             | 45    | 29                  | 40  | 45  | 34               | 48  | 35 | 36  | 50           | 44 | 0     | 0     | 0       | 406 | 59 |
| 60         | 0     | 0             | 0     | 12                  | 30  | 97  | 20               | 120 | 71 | 54  | 0            | 2  | 0     | 0     | 0       | 406 | 60 |
| 61         | 0     | 0             | 0     | 36                  | 369 | 0   | 0                | 0   | 0  | 0   | 0            | 1  | 0     | 0     | 0       | 406 | 61 |
| 62         | 0     | 0             | 0     | 320                 | 42  | 9   | 9                | 3   | 16 | 0   | 2            | 5  | 0     | 0     | 0       | 406 | 62 |
| 63         | 0     | 0             | 0     | 0                   | 0   | 0   | 0                | 0   | 0  | 0   | 0            | 41 | 365   | 0     | 41      | 406 | 63 |
| 64         | 0     | 0             | 0     | 195                 | 98  | 6   | 17               | 0   | 1  | 39  | 2            | 48 | 0     | 0     | 0       | 406 | 64 |
| 65         | 0     | 0             | 0     | 28                  | 39  | 65  | 49               | 52  | 71 | 38  | 18           | 46 | 0     | 0     | 0       | 406 | 65 |
| 66         | 0     | 0             | 0     | 0                   | 0   | 0   | 0                | 0   | 0  | 0   | 0            | 0  | 390   | 16    | 16      | 406 | 66 |
| 67         | 0     | 0             | 0     | 0                   | 0   | 0   | 0                | 0   | 0  | 0   | 0            | 0  | 391   | 15    | 15      | 406 | 67 |
| 68         | 0     | 0             | 0     | 0                   | 0   | 0   | 0                | 0   | 0  | 0   | 0            | 0  | 390   | 16    | 16      | 406 | 68 |
| 69         | 0     | 0             | 0     | 0                   | 0   | 0   | 0                | 0   | 0  | 0   | 0            | 0  | 390   | 16    | 16      | 406 | 69 |
| 70         | 0     | 0             | 0     | 0                   | 0   | 0   | 0                | 0   | 0  | 0   | 0            | 0  | 393   | 13    | 13      | 406 | 70 |
| 71         | 0     | 0             | 0     | 0                   | 0   | 0   | 0                | 0   | 0  | 0   | 0            | 0  | 392   | 14    | 14      | 406 | 71 |
| 72         | 0     | 3             | 0     | 0                   | 0   | 0   | 0                | 0   | 0  | 0   | 0            | 0  | 394   | 9     | 12      | 406 | 72 |
| 73         | 0     | 0             | 0     | 0                   | 0   | 0   | 0                | 0   | 0  | 0   | 0            | 0  | 396   | 10    | 10      | 406 | 73 |
| 74         | 0     | 0             | 0     | 0                   | 0   | 0   | 0                | 0   | 0  | 0   | 0            | 0  | 398   | 8     | 8       | 406 | 74 |
| 75         | 0     | 0             | 0     | 0                   | 0   | 0   | 0                | 0   | 0  | 0   | 0            | 0  | 399   | 7     | 7       | 406 | 75 |
| 76         | 0     | 0             | 0     | 0                   | 0   | 0   | 0                | 0   | 0  | 0   | 0            | 0  | 398   | 8     | 8       | 406 | 76 |
| 77         | 0     | 0             | 0     | 0                   | 0   | 0   | 0                | 0   | 0  | 0   | 0            | 0  | 398   | 8     | 8       | 406 | 77 |
| 78         | 0     | 0             | 0     | 0                   | 0   | 0   | 0                | 0   | 0  | 0   | 0            | 0  | 402   | 4     | 4       | 406 | 78 |
| 79         | 0     | 0             | 0     | 0                   | 0   | 0   | 0                | 0   | 0  | 0   | 0            | 0  | 402   | 4     | 4       | 406 | 79 |
| 80         | 0     | 0             | 0     | 0                   | 0   | 0   | 0                | 0   | 0  | 0   | 0            | 0  | 403   | 3     | 3       | 406 | 80 |
| 81         | 0     | 0             | 0     | 0                   | 0   | 0   | 0                | 0   | 0  | 0   | 0            | 0  | 405   | 1     | 1       | 406 | 81 |

| SINGLE COL | COL & | FREQUENCIES - | FOR 0 | USPEW2002-01NII_E 1 | 2   | 3   | (COLS. 1-146 ) 4 | 5  | 6  | / 7 | NCARDS 406 8 | 9  | BLANK | OTHER | NONBLNK | COL |
|------------|-------|---------------|-------|---------------------|-----|-----|------------------|----|----|-----|--------------|----|-------|-------|---------|-----|
| 82         | 0     | 0             | 0     | 0                   | 0   | 0   | 0                | 0  | 0  | 0   | 0            | 0  | 405   | 1     | 1       | 82  |
| 83         | 0     | 0             | 0     | 0                   | 0   | 0   | 0                | 0  | 0  | 0   | 0            | 0  | 405   | 1     | 1       | 83  |
| 84         | 0     | 0             | 0     | 0                   | 0   | 0   | 0                | 0  | 0  | 0   | 0            | 0  | 406   | 0     | 0       | 84  |
| 85         | 0     | 0             | 0     | 0                   | 0   | 0   | 0                | 0  | 0  | 0   | 0            | 0  | 405   | 1     | 1       | 85  |
| 86         | 0     | 0             | 0     | 0                   | 0   | 0   | 0                | 0  | 0  | 0   | 0            | 0  | 405   | 1     | 1       | 86  |
| 87         | 0     | 0             | 0     | 0                   | 0   | 0   | 0                | 0  | 0  | 0   | 0            | 0  | 405   | 1     | 1       | 87  |
| 88         | 0     | 0             | 0     | 0                   | 0   | 0   | 0                | 0  | 0  | 0   | 0            | 0  | 405   | 1     | 1       | 88  |
| 89         | 0     | 0             | 0     | 0                   | 0   | 0   | 0                | 0  | 0  | 0   | 0            | 0  | 405   | 1     | 1       | 89  |
| 90         | 0     | 0             | 0     | 0                   | 0   | 0   | 0                | 0  | 0  | 0   | 0            | 0  | 406   | 0     | 0       | 90  |
| 91         | 0     | 0             | 0     | 0                   | 0   | 0   | 0                | 0  | 0  | 0   | 0            | 0  | 406   | 0     | 0       | 91  |
| 92         | 0     | 0             | 0     | 0                   | 0   | 0   | 0                | 0  | 0  | 0   | 0            | 0  | 406   | 0     | 0       | 92  |
| 93         | 0     | 0             | 0     | 0                   | 0   | 0   | 0                | 0  | 0  | 0   | 0            | 0  | 406   | 0     | 0       | 93  |
| 94         | 0     | 0             | 0     | 0                   | 0   | 0   | 0                | 0  | 0  | 0   | 0            | 0  | 406   | 0     | 0       | 94  |
| 95         | 0     | 0             | 0     | 0                   | 0   | 0   | 0                | 0  | 0  | 0   | 0            | 0  | 406   | 0     | 0       | 95  |
| 96         | 0     | 0             | 0     | 0                   | 0   | 0   | 0                | 0  | 0  | 0   | 0            | 0  | 406   | 0     | 0       | 96  |
| 97         | 0     | 0             | 0     | 0                   | 0   | 0   | 0                | 0  | 0  | 0   | 0            | 0  | 406   | 0     | 0       | 97  |
| 98         | 0     | 0             | 0     | 0                   | 0   | 0   | 0                | 0  | 0  | 0   | 0            | 0  | 406   | 0     | 0       | 98  |
| 99         | 0     | 0             | 0     | 0                   | 0   | 0   | 0                | 0  | 0  | 0   | 0            | 0  | 406   | 0     | 0       | 99  |
| 100        | 0     | 0             | 0     | 0                   | 0   | 0   | 0                | 0  | 0  | 0   | 0            | 0  | 406   | 0     | 0       | 100 |
| 101        | 0     | 0             | 0     | 0                   | 0   | 0   | 0                | 0  | 0  | 0   | 0            | 0  | 406   | 0     | 0       | 101 |
| 102        | 0     | 0             | 0     | 0                   | 0   | 0   | 0                | 0  | 0  | 0   | 0            | 0  | 406   | 0     | 0       | 102 |
| 103        | 0     | 0             | 0     | 0                   | 0   | 0   | 0                | 0  | 0  | 0   | 0            | 0  | 406   | 0     | 0       | 103 |
| 104        | 0     | 0             | 0     | 0                   | 0   | 0   | 0                | 0  | 0  | 0   | 0            | 0  | 406   | 0     | 0       | 104 |
| 105        | 0     | 0             | 0     | 0                   | 0   | 0   | 0                | 0  | 0  | 0   | 0            | 0  | 406   | 0     | 0       | 105 |
| 106        | 0     | 0             | 0     | 0                   | 0   | 0   | 0                | 0  | 0  | 0   | 0            | 0  | 406   | 0     | 0       | 106 |
| 107        | 0     | 0             | 0     | 0                   | 0   | 0   | 0                | 0  | 0  | 0   | 0            | 0  | 406   | 0     | 0       | 107 |
| 108        | 0     | 0             | 0     | 0                   | 0   | 0   | 0                | 0  | 0  | 0   | 0            | 0  | 406   | 0     | 0       | 108 |
| 109        | 0     | 0             | 0     | 0                   | 0   | 0   | 0                | 0  | 0  | 0   | 0            | 0  | 406   | 0     | 0       | 109 |
| 110        | 0     | 0             | 0     | 0                   | 0   | 0   | 0                | 0  | 0  | 0   | 0            | 0  | 406   | 0     | 0       | 110 |
| 111        | 0     | 0             | 0     | 0                   | 0   | 0   | 0                | 0  | 0  | 0   | 0            | 0  | 406   | 0     | 0       | 111 |
| 112        | 0     | 0             | 0     | 0                   | 0   | 0   | 0                | 0  | 0  | 0   | 0            | 0  | 406   | 0     | 0       | 112 |
| 113        | 0     | 0             | 0     | 0                   | 0   | 0   | 0                | 0  | 0  | 0   | 0            | 0  | 406   | 0     | 0       | 113 |
| 114        | 0     | 0             | 0     | 0                   | 0   | 0   | 0                | 0  | 0  | 0   | 0            | 0  | 406   | 0     | 0       | 114 |
| 115        | 0     | 0             | 0     | 0                   | 0   | 0   | 0                | 0  | 0  | 0   | 0            | 0  | 406   | 0     | 0       | 115 |
| 116        | 0     | 0             | 0     | 0                   | 0   | 0   | 0                | 0  | 0  | 0   | 0            | 0  | 406   | 0     | 0       | 116 |
| 117        | 0     | 0             | 0     | 0                   | 0   | 0   | 0                | 0  | 0  | 0   | 0            | 0  | 406   | 0     | 0       | 117 |
| 118        | 0     | 0             | 0     | 0                   | 0   | 0   | 0                | 0  | 0  | 0   | 0            | 0  | 406   | 0     | 0       | 118 |
| 119        | 0     | 0             | 0     | 0                   | 0   | 0   | 0                | 0  | 0  | 0   | 0            | 0  | 406   | 0     | 0       | 119 |
| 120        | 0     | 0             | 0     | 0                   | 0   | 0   | 0                | 0  | 0  | 0   | 0            | 0  | 406   | 0     | 0       | 120 |
| 121        | 0     | 0             | 0     | 0                   | 0   | 0   | 0                | 0  | 0  | 0   | 0            | 0  | 406   | 0     | 0       | 121 |
| 122        | 0     | 0             | 0     | 0                   | 0   | 0   | 0                | 0  | 0  | 0   | 0            | 0  | 406   | 0     | 0       | 122 |
| 123        | 0     | 0             | 0     | 0                   | 0   | 0   | 0                | 0  | 0  | 0   | 0            | 0  | 406   | 0     | 0       | 123 |
| 124        | 0     | 0             | 0     | 0                   | 0   | 0   | 0                | 0  | 0  | 0   | 0            | 0  | 406   | 0     | 0       | 124 |
| 125        | 0     | 0             | 0     | 0                   | 0   | 0   | 0                | 0  | 0  | 0   | 0            | 0  | 406   | 0     | 0       | 125 |
| 126        | 0     | 0             | 0     | 0                   | 0   | 0   | 0                | 0  | 0  | 0   | 0            | 0  | 406   | 0     | 0       | 126 |
| 127        | 0     | 0             | 0     | 0                   | 0   | 0   | 0                | 0  | 0  | 0   | 0            | 0  | 406   | 0     | 0       | 127 |
| 128        | 0     | 0             | 0     | 0                   | 0   | 0   | 0                | 0  | 0  | 0   | 0            | 0  | 406   | 0     | 0       | 128 |
| 129        | 0     | 0             | 0     | 0                   | 0   | 0   | 0                | 0  | 0  | 0   | 0            | 0  | 406   | 0     | 0       | 129 |
| 130        | 0     | 0             | 0     | 0                   | 0   | 0   | 0                | 0  | 0  | 0   | 0            | 0  | 406   | 0     | 0       | 130 |
| 131        | 0     | 0             | 0     | 0                   | 0   | 0   | 0                | 0  | 0  | 0   | 0            | 0  | 406   | 0     | 0       | 131 |
| 132        | 0     | 0             | 0     | 0                   | 0   | 0   | 0                | 0  | 0  | 0   | 0            | 0  | 406   | 0     | 0       | 132 |
| 133        | 0     | 0             | 0     | 0                   | 0   | 0   | 0                | 0  | 0  | 0   | 0            | 0  | 406   | 0     | 0       | 133 |
| 134        | 0     | 0             | 0     | 0                   | 0   | 0   | 0                | 0  | 0  | 0   | 0            | 0  | 406   | 0     | 0       | 134 |
| 135        | 0     | 0             | 0     | 0                   | 0   | 0   | 0                | 0  | 0  | 0   | 0            | 0  | 406   | 0     | 0       | 135 |
| 136        | 0     | 0             | 0     | 0                   | 0   | 0   | 0                | 0  | 0  | 0   | 0            | 0  | 406   | 0     | 0       | 136 |
| 137        | 0     | 0             | 0     | 0                   | 0   | 0   | 0                | 0  | 0  | 0   | 0            | 0  | 406   | 0     | 0       | 137 |
| 138        | 0     | 0             | 0     | 118                 | 185 | 103 | 0                | 0  | 0  | 0   | 0            | 0  | 0     | 0     | 406     | 138 |
| 139        | 0     | 0             | 0     | 47                  | 95  | 123 | 141              | 0  | 0  | 0   | 0            | 0  | 0     | 0     | 406     | 139 |
| 140        | 0     | 0             | 0     | 45                  | 63  | 74  | 79               | 54 | 82 | 0   | 0            | 9  | 0     | 0     | 406     | 140 |
| 141        | 0     | 0             | 0     | 42                  | 117 | 120 | 125              | 0  | 0  | 0   | 0            | 2  | 0     | 0     | 406     | 141 |
| 142        | 0     | 0             | 0     | 297                 | 41  | 36  | 29               | 0  | 0  | 0   | 0            | 3  | 0     | 0     | 406     | 142 |
| 143        | 0     | 0             | 0     | 157                 | 121 | 72  | 25               | 31 | 0  | 0   | 0            | 0  | 0     | 0     | 406     | 143 |
| 144        | 0     | 0             | 0     | 0                   | 0   | 0   | 0                | 0  | 0  | 0   | 0            | 0  | 0     | 406   | 406     | 144 |
| 145        | 0     | 0             | 59    | 54                  | 33  | 83  | 22               | 29 | 44 | 25  | 37           | 20 | 0     | 0     | 406     | 145 |
| 146        | 0     | 0             | 28    | 32                  | 58  | 62  | 36               | 29 | 41 | 32  | 37           | 51 | 0     | 0     | 406     | 146 |
