# Supplementary material
Source: publisher figshare collection journal article supplement (https://sage.figshare.com/ndownloader/files/24995266)
Supplement: Supplementary file 7 [file 24995266]

|                                       |                                                        |
|---------------------------------------|--------------------------------------------------------|
| <b>Country:</b>                       | United States                                          |
| <b>Title:</b>                         | Office of Public Opinion Research, Survey #813:<br>War |
| <b>Survey Organization:</b>           | Office of Public Opinion Research                      |
| <b>Sponsor:</b>                       |                                                        |
| <b>Field Dates:</b>                   | March 26, 1942                                         |
| <b>Sample:</b>                        | National Adult                                         |
| <b>Sample Size:</b>                   | 2,538                                                  |
| <b>Sample Notes:</b>                  |                                                        |
| <b>Interview method:</b>              | Face to Face                                           |
| <b>Weight Location:</b>               | None                                                   |
| <b>No. of records per respondent:</b> | 1                                                      |

---

|                     |                                                                                                                                                                                                                                                                              |
|---------------------|------------------------------------------------------------------------------------------------------------------------------------------------------------------------------------------------------------------------------------------------------------------------------|
| <b>Usage Notes:</b> | Do not use column locations on the questionnaire as they refer to the column binary data. Use the new column guide on page 2 of the PDF document for the ASCII (.dat) dataset. In the new dataset, punches marked 'X' = and 'V' in the codebook = '11' and '12' respectively |
|---------------------|------------------------------------------------------------------------------------------------------------------------------------------------------------------------------------------------------------------------------------------------------------------------------|

Please note that data purchased from The Roper Center for Public Opinion Research may not be redisseminated without written permission. The results of any analyses conducted on the data may, however, be published with appropriate acknowledgments and source citation.

---

| Variable | Rec | Start | End | Format |
|----------|-----|-------|-----|--------|
| STUDY    | 1   | 1     | 3   | A3     |
| REGION   | 1   | 4     | 4   | A1     |
| STATE    | 1   | 5     | 6   | A2     |
| INTER    | 1   | 7     | 8   | A2     |
| RURAL    | 1   | 9     | 9   | A1     |
| Q1       | 1   | 10    | 12  | F3.0   |
| Q2A      | 1   | 13    | 15  | A3     |
| Q2B      | 1   | 16    | 17  | A2     |
| Q3       | 1   | 18    | 18  | A1     |
| Q4       | 1   | 19    | 19  | A1     |
| Q5       | 1   | 20    | 22  | F3.0   |
| Q6       | 1   | 23    | 25  | A3     |
| Q7       | 1   | 26    | 28  | F3.0   |
| Q8       | 1   | 29    | 31  | F3.0   |
| Q9A      | 1   | 32    | 32  | A1     |
| Q9B      | 1   | 33    | 34  | A2     |
| Q10      | 1   | 35    | 35  | A1     |
| Q11      | 1   | 36    | 36  | A1     |
| Q12A     | 1   | 37    | 37  | A1     |
| Q13A     | 1   | 38    | 39  | A2     |
| Q13B     | 1   | 40    | 41  | A2     |
| Q13C     | 1   | 42    | 43  | A2     |
| Q13D     | 1   | 44    | 45  | A2     |
| Q13E     | 1   | 46    | 47  | A2     |
| Q13F     | 1   | 48    | 49  | A2     |
| Q14      | 1   | 50    | 51  | A2     |
| Q15A     | 1   | 52    | 52  | A1     |
| Q15B     | 1   | 53    | 53  | A1     |
| Q16      | 1   | 54    | 55  | A2     |
| Q17      | 1   | 56    | 56  | A1     |
| Q18A_1   | 1   | 57    | 59  | F3.0   |
| Q18A_2   | 1   | 60    | 62  | F3.0   |
| Q18A_3   | 1   | 63    | 65  | F3.0   |
| Q18A_4   | 1   | 66    | 68  | F3.0   |
| Q18A_5   | 1   | 69    | 71  | F3.0   |
| Q18A_6   | 1   | 72    | 74  | F3.0   |
| Q18A_7   | 1   | 75    | 77  | F3.0   |
| Q18A_8   | 1   | 78    | 80  | F3.0   |
| Q18A_9   | 1   | 81    | 83  | F3.0   |
| Q18A_10  | 1   | 84    | 86  | F3.0   |
| Q18A_11  | 1   | 87    | 89  | F3.0   |
| Q18A_12  | 1   | 90    | 92  | F3.0   |
| Q18B_1   | 1   | 93    | 95  | F3.0   |
| Q18B_2   | 1   | 96    | 98  | F3.0   |
| Q18B_3   | 1   | 99    | 101 | F3.0   |
| Q18B_4   | 1   | 102   | 104 | F3.0   |
| Q18B_5   | 1   | 105   | 107 | F3.0   |
| Q18B_6   | 1   | 108   | 110 | F3.0   |

|          |   |     |     |      |
|----------|---|-----|-----|------|
| Q18B_7   | 1 | 111 | 113 | F3.0 |
| Q18B_8   | 1 | 114 | 116 | F3.0 |
| Q18B_9   | 1 | 117 | 119 | F3.0 |
| Q18B_10  | 1 | 120 | 122 | F3.0 |
| Q18B_11  | 1 | 123 | 125 | F3.0 |
| Q18B_12  | 1 | 126 | 128 | F3.0 |
| Q18B_SEQ | 1 | 129 | 129 | A1   |
| Q19      | 1 | 130 | 132 | F3.0 |
| Q20      | 1 | 133 | 135 | F3.0 |
| Q21      | 1 | 136 | 136 | A1   |
| Q22ABC   | 1 | 137 | 137 | A1   |
| Q23      | 1 | 138 | 140 | F3.0 |
| Q24      | 1 | 141 | 143 | F3.0 |
| Q25A     | 1 | 144 | 144 | A1   |
| Q25B     | 1 | 145 | 145 | A1   |
| Q26      | 1 | 146 | 148 | F3.0 |
| Q27      | 1 | 149 | 151 | F3.0 |
| Q28AB    | 1 | 152 | 152 | A1   |
| Q29      | 1 | 153 | 154 | A2   |
| Q30AB    | 1 | 155 | 155 | A1   |
| Q31      | 1 | 156 | 156 | A1   |
| Q32_F    | 1 | 157 | 157 | A1   |
| Q32_M    | 1 | 158 | 158 | A1   |
| Q33A     | 1 | 159 | 159 | A1   |
| STATUS   | 1 | 160 | 160 | A1   |
| CAR      | 1 | 161 | 161 | A1   |
| SEX      | 1 | 162 | 162 | A1   |
| OCCU     | 1 | 163 | 164 | A2   |
| AGE      | 1 | 165 | 166 | A2   |
| PHONE    | 1 | 167 | 167 | A1   |
| PLACE    | 1 | 168 | 168 | A1   |
| DATE     | 1 | 169 | 170 | A2   |
| QUESTION | 1 | 171 | 174 | A4   |
| XSCORE   | 1 | 175 | 175 | A1   |
| PSCORE   | 1 | 176 | 176 | A1   |
| MSCORE   | 1 | 177 | 177 | A1   |

Ballot # Col. 1,2,3 (813)  
Section & State Col. 4,5  
Interviewers # Col. 6,7  
Rural - Urban Col. 8

813

813  
3-28-42

## PRINCETON UNIVERSITY OFFICE OF PUBLIC OPINION RESEARCH

Col. 9 1. Which do you think is our No. 1 enemy in the war—Japan or Germany?  
1. ☐ Japan 2. ☐ Germany 3. ☐ Both 4. ☐ No Opinion *No Ans.*

2a. Do you think we are now doing all we can to defeat Japan and Germany, or could we be doing more?  
5. ☐ Doing all we can 6. ☐ Could be doing more 7. ☐ No Opinion *No Ans*

If "Could be doing more" ask:  
b. What more could we be doing?  
Col. 10,11 ..... - See Code - *wrong codes*  
..... *See correction*

Col. 12 3. Which of these two things do you think the United States should do:  
1. ☐ Send most of our army abroad to fight the enemy wherever they are, or  
2. ☐ Keep most of our army at home to protect the United States?  
3. ☐ Qualified answer ..... 4. ☐ No Opinion

Col. 13, 4. Do you think the government is giving the public as much information as it should about the war?  
☐ Yes ☐ No ☐ Too much ☐ No Opinion  
Comment: ..... - See Code: -

Col. 14 5. Which do you think has the smartest military leaders at present—Germany or Russia or the United States?  
1. ☐ Germany 2. ☐ Russia 3. ☐ United States 4. ☐ No Opinion *No Ans.*

6. Which do you think has the strongest navy at present—Japan or England or the United States?  
5. ☐ Japan 6. ☐ England 7. ☐ United States 8. ☐ No Opinion *No Ans.*

Col. 15 7. If Hitler offered peace now to all countries on the basis of not going farther, but of leaving matters as they are now, would you favor or oppose such a peace?  
1. ☐ Favor 2. ☐ Oppose 3. ☐ No Opinion *No Ans.*

8. Do you think the British are doing all they possibly can to win the war?  
4. ☐ Yes 5. ☐ No 6. ☐ No Opinion *No Ans.*

16 9a. Do you feel that you have a clear idea of what the war is all about?  
☒ Yes ☒ No ☒ Qualified answer ..... ☐ No Ans.  
..... - See Code: -

Col. 17,18 If "Yes" or a qualified answer, ask:  
b. Briefly, what would you say the war IS all about? ..... ☒ No Ans.  
..... *See Key*

Col. 19 10. About how much longer do you think the war will last? ..... - See Code: - ☐ No Opinion  
(Please record in terms of years and months)

Col. 20 11. What will bring the war to an end? ..... - See Code: -

Col. 21, 12a. Do you think that if Germany and Japan, should win this war they would keep their armies over here to police the United States?  
\* ☒ Yes \* ☒ No \* ☐ They won't win 4. ☐ No Opinion  
If "No" ask: ..... - See Code: - *Space No Ans*  
b. Why not? .....

HAVE YOU CHECKED ANSWERS ON EACH QUESTION?

13. (HAND MAP TO RESPONDENT) Here is a map of the world. (MAKE SURE THAT RESPONDENT UNDERSTANDS WHERE THE UNITED STATES, EUROPE, AND ASIA ARE ON THE MAP)

- ol. ~~22-33~~ <sup>22-33</sup> a. Can you find Alaska on the map and tell me the number there? ☒ Number 22-23 (1) ☐ Don't know ☐ Don't know
- b. Can you find Australia? ☒ Number 24-25 (9) ☐ Don't know ☐ Don't know
- c. China? ☒ Number 26-27 (4) ☐ Don't know ☐ Don't know
- d. Brazil? ☒ 28-29 (2) ☐ Don't know
- e. Iceland? ☒ 30-31 (2) ☐ Don't know
- f. India? ☒ 32-33 (2) ☐ Don't know
- See Code - ☒ Can't understand map
- 00 - No Ans.

14. Which of these two things do you think the United States should try to do when the war is over:

- ol. ~~22-33~~ <sup>34,35</sup> ☐ Stay out of world affairs as much as we can, or
- ☐ Take an active part in world affairs? ☐ No Opinion
- MAIN REASON ..... See Code -

15a. If we win the war, how do you think we should treat the people in Germany?

Col. ~~22-33~~ <sup>36</sup> ..... See Code -

b. How should we treat the Nazi leaders?

Col. ~~22-33~~ <sup>37</sup> ..... See Code -

16. Do you think Russia can be trusted to cooperate with us after the war is over?

- 38,39 ☐ Yes ☐ No ☐ No Opinion
- Col. ~~22-33~~ <sup>40</sup> MAIN REASON ..... See Code -

17. As you know, a lot of new government offices have been set up in Washington especially to deal with national defense and war problems. From what you have heard, do you think most of these offices are doing a good job, or a poor one?

- Col. ~~22-33~~ <sup>41</sup> ☐ Good job ☐ Poor job ☐ Fair job
- ☐ Doing the best they can ☐ No Opinion
- 0 - No Ans.

18a. Are there any people or groups here in the United States that you think are taking unfair advantage of the war to get money or power for themselves?

Col. ~~22-33~~ <sup>41</sup> ..... See Code - Space - No ans. ☐ None

b. (HAND CARD TO RESPONDENT) Do you think any of these groups are taking unfair advantage of the war to get money or power for themselves?

- Col. ~~22-33~~ <sup>42</sup> ☐ Farmers ☐ Protestants ☐ Labor leaders
- ☐ Negroes ☐ Catholics ☐ Congressmen
- ☐ Jews ☐ People on relief ☐ Business men
- ☐ Foreign-born ☐ Factory workers ☐ Wealthy people
- Col. ~~22-33~~ <sup>43</sup> ☐ None of these groups ☐ Can't read ☐ No Opinion
- Space - No ans.

19. Do you think most people can be trusted?

- Col. ~~22-33~~ <sup>44</sup> ☐ Yes ☐ No ☐ Qualified answer ☐ No Opinion

20. Do you think success is dependent mostly on luck, on ability, or on pull?

- ☐ Luck ☐ Ability ☐ Pull ☐ No Opinion

21. After the war is over, do you think there will be jobs for everyone or lots of unemployment?

- Col. ~~22-33~~ <sup>45</sup> ☐ Jobs for everyone ☐ Lots of unemployment ☐ No Opinion
- ☐ Qualified answer

22a. Do you have any children?

☐ Yes ☐ No

If "Yes" on a, ask:

b. Do you think your children twenty years from now will be better off or worse off than you are now?

- Col. ~~22-33~~ <sup>46</sup> ☐ Better ☐ Worse ☐ Same ☐ No Opinion

If "No" on a, say:

c. Well, suppose you had some children. Do you think that if you had some children they would be better off or worse off twenty years from now than you are now?

- ☐ Better ☐ Worse ☐ Same ☐ No Opinion

HAVE YOU CHECKED ANSWERS ON EACH QUESTION?

23. Do you think a poor man ( ) just as fair treatment in the law courts as ( ) h man? x 9 val-  
N.  
O. AN  
1. ☐ Yes 2. ☐ No 3. ☐ No Opinion  
Col. 47  
24. In general, do you approve or disapprove of the way Roosevelt is handling his job as President today? V. No  
AN  
9.9 val  
4. ☐ Approve 5. ☐ Disapprove 6. ☐ No Opinion

25a. Do you feel that you personally are doing something that is important in helping to win the war?  
1. ☐ Yes 2. ☐ No 3. ☐ Qualified answer.....  
Col. 48  
If "Yes" or a qualified answer, ask:  
b. What sort of thing are you doing? See Code

26. Are you doing any work in the civilian defense program such as air raid warning, first aid, and the like?  
1. ☐ Yes 2. ☐ No 3. ☐ No, but signed up O No  
AN  
Col. 50  
27. Have you or your family bought any defense bonds or defense stamps?  
4. ☐ Yes 5. ☐ No V NO  
AN

28a. Are you or your family saving materials such as metal, rubber, or waste paper?  
☐ Yes ☐ No  
Col. 51  
If "Yes," ask:  
b. What materials are you saving? See Code

29. After finding out what each person can do, should the government have the power to tell each citizen what to do as his part in the war effort, and require him or her to do it?  
☐ Yes ☐ No ☐ No Opinion  
Col. 52, 53  
COMMENT See Code

30a. Do you remember FOR CERTAIN whether or not you voted in the 1940 Presidential election?  
1. ☐ Yes, voted 2. ☐ No, didn't vote 3. ☐ No, too young to vote  
Col. 54  
If "Yes," ask:  
b. Did you vote for Willkie, Roosevelt, or Thomas?  
4. ☐ Willkie 5. ☐ Roosevelt 6. ☐ Thomas 7. ☐ Other

31. Are you a member of a church?  
☐ Yes Which denomination? See Code ☐ No  
Col. 55

32. In what country were your parents born? Father... Col. 56 Mother ... Col. 57 See Code  
Col. 56, 57

33a. Do you remember the name of the last school you attended? See Code  
Col. 58  
b. How far did you go in that school? ☒ No schooling  
1. ☐ Grammar school, incomplete 4. ☐ High school, graduated Y N, ANS.  
2. ☐ Grammar school, graduated 5. ☐ College, incomplete  
3. ☐ High school, incomplete 6. ☐ College, graduated  
7. ☐ Other

Col. 59 ☐ Wealthy ☒ AV ☐ P ☒ OR-WPA ☐ Car Col. ☐ Man Col. ☐ Wh Col.  
☒ AV+ ☐ OAA ☒ OR-Home Relief ☒ No Car ☒ Woman ☒ CL ☒ 62

SPECIFIC OCCUPATION Col. 63, 64 ESTIMATE AGE Col. 65, 66  
STREET CITY

Is there a telephone in your home (place where you live)? ☐ Yes ☐ No  
Col. 67  
If "Yes", ask: Is the telephone listed either under your name or the name of a member of your immediate family? ☐ Yes ☐ No

Col. 68 Place of interview: ☐ Home ☒ Office ☐ Street ☐ Other See Code  
Interviewer .....  
Date this interview was made Col. 69, 70

HAVE YOU CHECKED ANSWERS ON EACH QUESTION  
AND ALL VITAL INFORMATION?

Info. Some Groups  
Col 75

QUESTIONNAIRE NO. COL. 68, 69, 70, 71, 72, 73, 74

# Extra Codes

Utilisation of Columns on 80-column IBM Card: OPOR Study #813, 3/26/42

| Column |                           |
|--------|---------------------------|
| 1-3    | Study #: 813              |
| 4-5    | Region of nation          |
| 6-7    | Interviewer #             |
| 8      | Rural-urban               |
| 9      | Ques. 1, 2a               |
| 10-11  | Ques. 2b                  |
| 12     | Ques. 3                   |
| 13     | Ques. 4                   |
| 14     | Ques. 5, 6                |
| 15     | Ques. 7, 8                |
| 16     | Ques. 9a                  |
| 17-18  | Ques. 9b                  |
| 19     | Ques. 10                  |
| 20     | Ques. 11                  |
| 21     | Ques. 12                  |
| 22-33  | Ques. 13 (actual numbers) |
| 34-35  | Ques. 14                  |
| 36     | Ques. 15a                 |
| 37     | Ques. 15b                 |
| 38-39  | Ques. 16                  |
| 40     | Ques. 17                  |
| 41     | Ques. 18a                 |
| 42     | Ques. 18b                 |
| 43     | Ques. 18b seq.            |
| 44     | Ques. 19, 20              |
| 45     | Ques. 21                  |
| 46     | Ques. 22a, b, c           |
| 47     | Ques. 23, 24              |
| 48     | Ques. 25a                 |
| 49     | Ques. 25b                 |
| 50     | Ques. 26, 27              |
| 51     | Ques. 28                  |
| 52-53  | Ques. 29                  |
| 54     | Ques. 30                  |
| 55     | Ques. 31                  |
| 56-57  | Ques. 32                  |
| 58     | Ques. 33                  |
| 59     | Socio-eco. status         |
| 60     | Car ownership             |
| 61     | Sex                       |
| 62     | Race                      |
| 63, 64 | Occupation                |
| 65, 66 | Age (actual)              |
| 67     | Telephone ownership       |
| 68     | Place                     |
| 69-70  | Date of interview         |
| 71-74  | Questionnaire number      |
| 75     | "X" and Information score |
| 76     | Participation score       |
| 77     | Morale score              |

THIS KEY IS A  
CORRECTION OF THE CODEBOOK.



PLEASE FILE WITH --

Codes for OPOR #813

Cols. 4, 5: Region and State      Col. 8: Rural-Urban

11 Maine  
12 NH  
13 VT  
14 Mass  
15 RI  
16 Conn  
21 NY  
22 NJ  
23 Penn  
24 Md  
25 Del  
26 W. Va  
31 Ohio  
32 Mich  
33 Ind  
34 Ill  
41 Wisc  
42 Minn  
43 Iowa  
44 Mo  
45 ND  
46 SD  
47 Neb  
48 Kans  
51 NC  
52 SC  
53 Va  
54 Ga  
55 Ala  
56 Ark  
57 FL  
58 Ky  
59 La  
81 Miss  
82 Okla  
83 Tenn  
84 Tex  
61 Mont  
62 Ariz  
63 Colo  
64 Ida  
65 Wyo  
66 Utah  
67 Nev  
68 N. Mex  
71 Cal  
72 Ore  
73 Wash

1 Farm  
2 Towns under 2,500  
3 2500 to 10,000  
4 10,000 to 100,000  
5 100,000 to 500,000  
6 500,000 and over  
7 Rural non-farm

Col. 55: Religion

1 Catholic  
2 Baptist  
3 Methodist  
4 Jewish  
5 Lutheran  
6 Presbyterian  
7 Episcopalian  
8 Congregational  
9 Reformed  
0 Other Protestant  
V Others  
X Non-church members  
SP No answer

Col. 63 Occupation

V Professional  
X Semi-Professional  
0 Farmers, Farm Labor  
1 Business Men  
2 White Collar  
3 Skilled  
4 Semi-skilled  
5 Domestic service  
6 Protective service  
7 Service workers, other  
8 Small Business men  
9 Unskilled  
SP Undesignated

Col. 64 Occupation

1 Employer, employed full  
or part-time  
2 Housewives, mothers, widows  
3 Students (25 years or younger)  
4 Retired  
5 Unemployed  
V Undesignated

# 813

Information Score --- col. 75

One point given for every country named correctly on question 13.

0 punched if respondent could not understand the map, or named no countries correctly. Nothing punched if no answer on question 13.

-Low - 0,1  
Middle - 2,3,4,5  
High - 6

Participation Score --- col. 76

One point given for 1, 2, 3, 4, 5, 6, 7, 8, 9, or V on col. 49 (question 25b). One point given for "Yes" or "No, but signed up" on question 26. One point given for "Yes" on question 27. One point given for "Yes" on question 28a. ) 0 punched if respondent gets no points for participation.

Morale Score --- col. 77

One point each given for the following answers:

- 1,3,5,6 on question 3
- 1,2,3,4,V on question 4
- 2 on question 7
- 1,3 on question 9a
- 4,5,6 on question 10
- 0,1,2,3,5 on question 11
- 4,5,6 on question 13 (col. 75)
- 3,4,5,6,7,8,9 on question 14
- 1 on question 19
- 6 on question 20
- 1 on question 23

0 is punched if respondentx gets no points. Scores of 10 are punched V; scores of 11 are punched X.

#813

Question 2b

- VV No comment
- XX Words, but no suggestions
- 00 Don't know -- Can't say just what

General Internal Suggestions

- 01 Apply common sense
- 02 More efficiency
- 03 Stop squabbling with each other
- 04 Pay less attention to politics
- 05 Take war more seriously -- be more "War-minded"
- 06 Civilians could be doing more
- 07 Civilians should sacrifice more
- 08 We should all work harder
- 09 We should conserve more materials
- 0V Stop criticism of war effort
- 0X More work - less talk

Financial

- 10 Spend more money on war
- 11 Buy more defense bonds and stamps
- 12 Put check on profiteers

Federal Government

- 20 Better administration by Washington - "Get the Government straightened out"
- 21 Scrap needless bureaus in Washington
- 22 Cut out red tape in Washington
- 23 Give one man complete responsibility
- 24 President should have more power
- 25 Disband Congress
- 26 Congress could do more
- 27 More direction for the people

Internal Organization

- 30 Organize for more production
- 31 Integrate government and industry
- 32 Capital and labor should cooperate
- 33 Organize civilians -- Civilian mobilization
- 34 More training for war industry
- 35 Conscript everyone
- 36 Conscript women

#### Production -- General

- 40 Increase production -- Speed up production
- 41 Devote more of our resources to war production
- 42 Increase production to send more war materials abroad
- 43 Produce more airplanes
- 44 Work our factories harder
- 45 Give small business a chance
- 46 Industry should be doing more - should cooperate more
- 47 Conscript industry
- 48 Make rejected men do something

#### Production -- Labor problems

- 50 Straighten out labor situation
- 51 Control labor unions
- 52 Stop strikes
- 53 Open shop
- 54 Put more men to work
- 55 Work longer hours
- 56 Stop extra pay for overtime
- 57 Conscript labor
- 58 Pay better wages
- 59 Abolish "slowdowns"

#### Military Suggestions

- 60 Train troops faster
- 61 Send more troops abroad
- 62 Send more war materials abroad
- 63 Send more materials and men abroad
- 64 Begin a military offensive
- 65 Attack Japan directly
- 66 Stop U Boats in Our waters
- 67 More defensive action
- 68 Supreme Military Command
- 69 Enlarge navy
- 6V Army cooperation in different parts of the army.

#### Scapegoat solutions

- 70 Crack down on aliens -- wealthy people

#### Religious solutions

80

#### Favor special groups

- 90 Help people on relief
- 91 Put farmers to work
- 92 Put Negroes to work

#813

Question 4

- Sp -- No Answer
- O -- No Opinion
- V -- Too much
- X -- Qualified answer: enough about some things, not enough about others
- 1 -- Yes, Other
- 2 -- Yes, but they hold out on some topics
- 3 -- Yes, but it is often late
- 4 -- Yes, but it is colored by propaganda -- biased, distorted, etc.
- 5 -- No, we should be getting more -- they hold out on some topics -- there is a lot we don't know -- we don't hear half what goes on -- we could stand to know more
- 6 -- No, they hold back information too long
- 7 -- No, the news is distorted -- propaganda -- you can't believe half of what you read -- it is too inaccurate -- there are conflicting reports -- some of it is contradictory -- not all authentic
- 8 -- No, no Comment
- 9 -- No, Other

#813

Qualified Answers  
Questions 3 and 9a

Question 3

- 0 - No Answer
- 1 - Send most of our army abroad
- 2 - Keep most of our army at home
- 3 - Qualified Answer, No Comment or  
Qualified Answer, Comment, but no illumination of answer
- 4 - No Opinion - "Whatever seems best" - "Depends on ....."
- 5 - Send some abroad and keep some here - half and half - keep enough  
here to defend the U.S. and send the rest abroad -- send them  
wherever they are needed
- 6 - Send them abroad when we can supply them properly - don't send them  
abroad until they are properly prepared
- 7 - Let the president decide - let the government decide -- let the  
military strategists decide
- 8 - Keep on as we are now

Question 9a

- 0 - No Answer
- 1 - Yes
- 2 - no .. "Nobody does"
- 3 - Qualified answer -- Some times do, sometimes don't --- More or less  
--- etc. etc.

#813

Question 9b

VV No comment

XX Words, but no interpretation -- "Aggression"

Ideological Interpretations

- 01 It is a fight between totalitarianism and democracy, fascism and democracy -- it is freedom fighting against slavery -- we are fighting for democracy -- freedom for all nations -- international honor, decency, and respect of treaties
- 02 It is a war between Christianity and barbarism - it is a war between right and wrong -- "for freedom of thought and religion" -- "religion"
- 03 It is a fight against Hitlerism -- against Prussian militarism
- 04 It is a fight against Japanese militarism
- 05 Hitler wants to spread his ideas -- establish a new order
- 07 German race doctrines have led to this war
- 08 Greed -- worldly possessions -- hatred - selfishness -- lack of religion have caused this war -- it is a religious war
- 09 It is fulfilling the prophecy of the Bible -- it is fulfilling God's plan
- 10 It is a social revolution -- product of a decadent civilization -- "There has been too much inequality in the world." -- It is a class war
- 11 Germany wants revenge -- wants to destroy the injustice of the Versailles treaty
- 12 It is a fight for humanity's sake - to permit the decent people of the world to live in peace - "trying to make this a war to end wars" a fight between gangsters and decent people
- 13 It is a fight between fascism and communism

Economic Interpretations

- 20 It is an economic war -- "Greed" -- "It's always been greed and politics and is now too."
- 21 The have-nots want what the haves possess
- 22 Germany is trying to gain economic control -- advantages -- trade -- resources -- "Greed of the axis powers"
- 23 Japan is trying to gain economic control, etc.

# 813  
Question 9b

- 24 It is an imperialist war -- "Financial and politics"
- 25 It is a war for money -- "Graft" -- profiteering
- 26 It is a war for land -- "Territorial grab"
- 27 It is a war for trade
- 28 It is a war for food
- 29 It is a war for raw materials
- 30 Overpopulation of Axis countries
- 31 It is the result of economic conditions brought about by the previous war

It is a war for power

- 40 It is a political war -- it is a war for power -- a war of conquest-- world domination
- 41 ( ) and ( ) two countries fighting each other both want to dominate -- "One wanting to master the other one." -- survival of the fittest
- 42 Hitler (Germany, the Nazis, the Axis) wants to rule the world
- 43 (Hitler, Germany, the Nazis the dictators, the Axis) wants to dominate this includes everything except "World domination") -- Germany wants to expand -- Germany wants to get more territory, more power, a place in the sun -- the dictators want power
- 44 Japan wants to dominate
- 45 Britain wants to dominate
- 46 U. S. wants to dominate
- 47 Germany has attacked (us) and we are defending ourselves -- it is a war to defeat Germany (The Axis, Hitler, etc.) -- We are fighting because we have to -- We are fighting to protect ourselves -- "Whether we will have any freedom or be dictated to by Hitler" -- "To preserve our way of life"
- 48 Japan has attacked us -- we are fighting to defeat Japan
- 49 We are fighting to subjugate ( ) Germany and Japan



Someone is to blame for the war

- 60 Everyone is to blame
- 61 Germany (The Axis, the Nazis, the dictators) are to blame
- 62 Japan is to blame
- 63 Russia is to blame -- the communists are to blame
- 64 The U. S. is to blame
- 65 Britain is to blame -- British imperialism is the cause of the war
- 66 Roosevelt is to blame
- 67 The Jews are to blame
- 68 The rich people, capitalists are to blame -- It is a capitalistic war --  
"The greed of the monied interests"
- 69 Hitler is to blame
- 70 The war is the result of greed on the part of a few men
- 71 The munitions makers are to blame
- 72 Britain and Germany are to blame -- it is a war for economic supremacy  
between Germany and England
- 73 U. S. and Britain are to blame

Miscellaneous answers

- 80 "Neglect of carrying out the terms of the last treaty of peace"
- 81 The result of the Versailles treaty
- 82 We are fighting to protect our interests (possessions, property)
- 83 It is a continuation of the last world war.
- 84 "A complication of diseases -- mental, social, and economic"
- 85 "A struggle between capitalism and dictatorship centering about people  
who wish to be free from both."  
"To save capitalism: otherwise we wouldn't be in it"
- 86 Freedom of the seas -- free trade
- 87 "Much of it is economic and some is religion" -- "It is a matter of ideals and  
economics"
- 88 About nothing at all -- they are fighting for no reason

#813 -- Question 10

0 --- No Answer

X --- No Opinion, don't know

1 --- Six months or less

2 --- 7 months to 1 year

3 --- 1 year plus to 2 years

4 --- 2 years plus to 3 years

5 --- 3 years plus to 4 years

6 --- 4 years plus to 5 years

7 --- More than 5 years but less than 10 years

8 --- 10 years or more

9 --- Indefinitely

#813

Question 11

Sp -- No Answer

X -- No Opinion -- Don't know -- words, but no opinion -- answer too obscure to interpret

0 -- We will win -- Downfall of Hitler, the Axis, the dictators, etc.

(All sorts of specifications, elaborations, etc.) (Mostly offensive action)

1 -- The Axis (Germany) will be exhausted by a war of attrition

They will run out of materials (supplies) -- will run out of soldiers -- will collapse internally -- will be starved out -- "Food will win the war for the U. S. A." -- the blockade will win the war

2 -- Revolt in conquered countries will bring the war to an end

3 -- Revolution within Germany -- uprising in Germany -- when German and Japanese people come to their senses -- they will kill Hitler -- the Axis will start fighting among themselves

4 -- Indecisive answers (no checked if "They won't win" on 12a)

Defeat (destruction) of one side or the other -- a military defeat -- a military victory -- one side will wear the other out -- one side will win a decisive victory --" the economic situation -- whoever rules the air -- super power -- etc. etc. breaking up the British Empire would do it

5-- We will win, probably -- I hope our side will win

6 -- A stalemate -- In peace -- an agreement -- a negotiated peace -- both sides will run out of materials -- both sides will be exhausted -- nobody will win -- it won't end

7 -- Defeat of Japan -- or -- defeat of Japan and negotiated peace with Germany -- "After we have reconquered all our possessions"

8 -- People will come to their senses -- people will stop war -- world revolution -- "People of world to get hold of world"

9 -- Religious interpretations

V -- An Axis victory -- defeat of the United Nations -- when we are exhausted -- "For Hitler and Japan to get what they want" --

#813

Question 12

sp -- No Answer

1 -- Yes

2 -- No, no comment

3 -- They won't win

4 -- No Opinion

No 5 -- They wouldn't be able to -- they might win the war but could never conquer U. S. -- they can never invade the U. S. -- they do not physically impossible -- we'd fight to the end -- we wouldn't let them

No 6 -- They would have their hands full at home and with the countries they have already conquered -- they would have enough trouble taking care of themselves

No 7 -- It wouldn't be profitable for them -- (other economic arguments)

No 8 -- The Allies won the last war but didn't keep their armies in Germany to police it -- reparations rather than occupation

No 9 -- They would find Quislings over here who would do the job for them -- would set up a puppet government over here

No 0 -- They would control us economically

No V -- They wouldn't really want to after the war - or need to

No X -- No, other -- "I don't know," -- "I don't think they would" -- "They won't win to that extent"

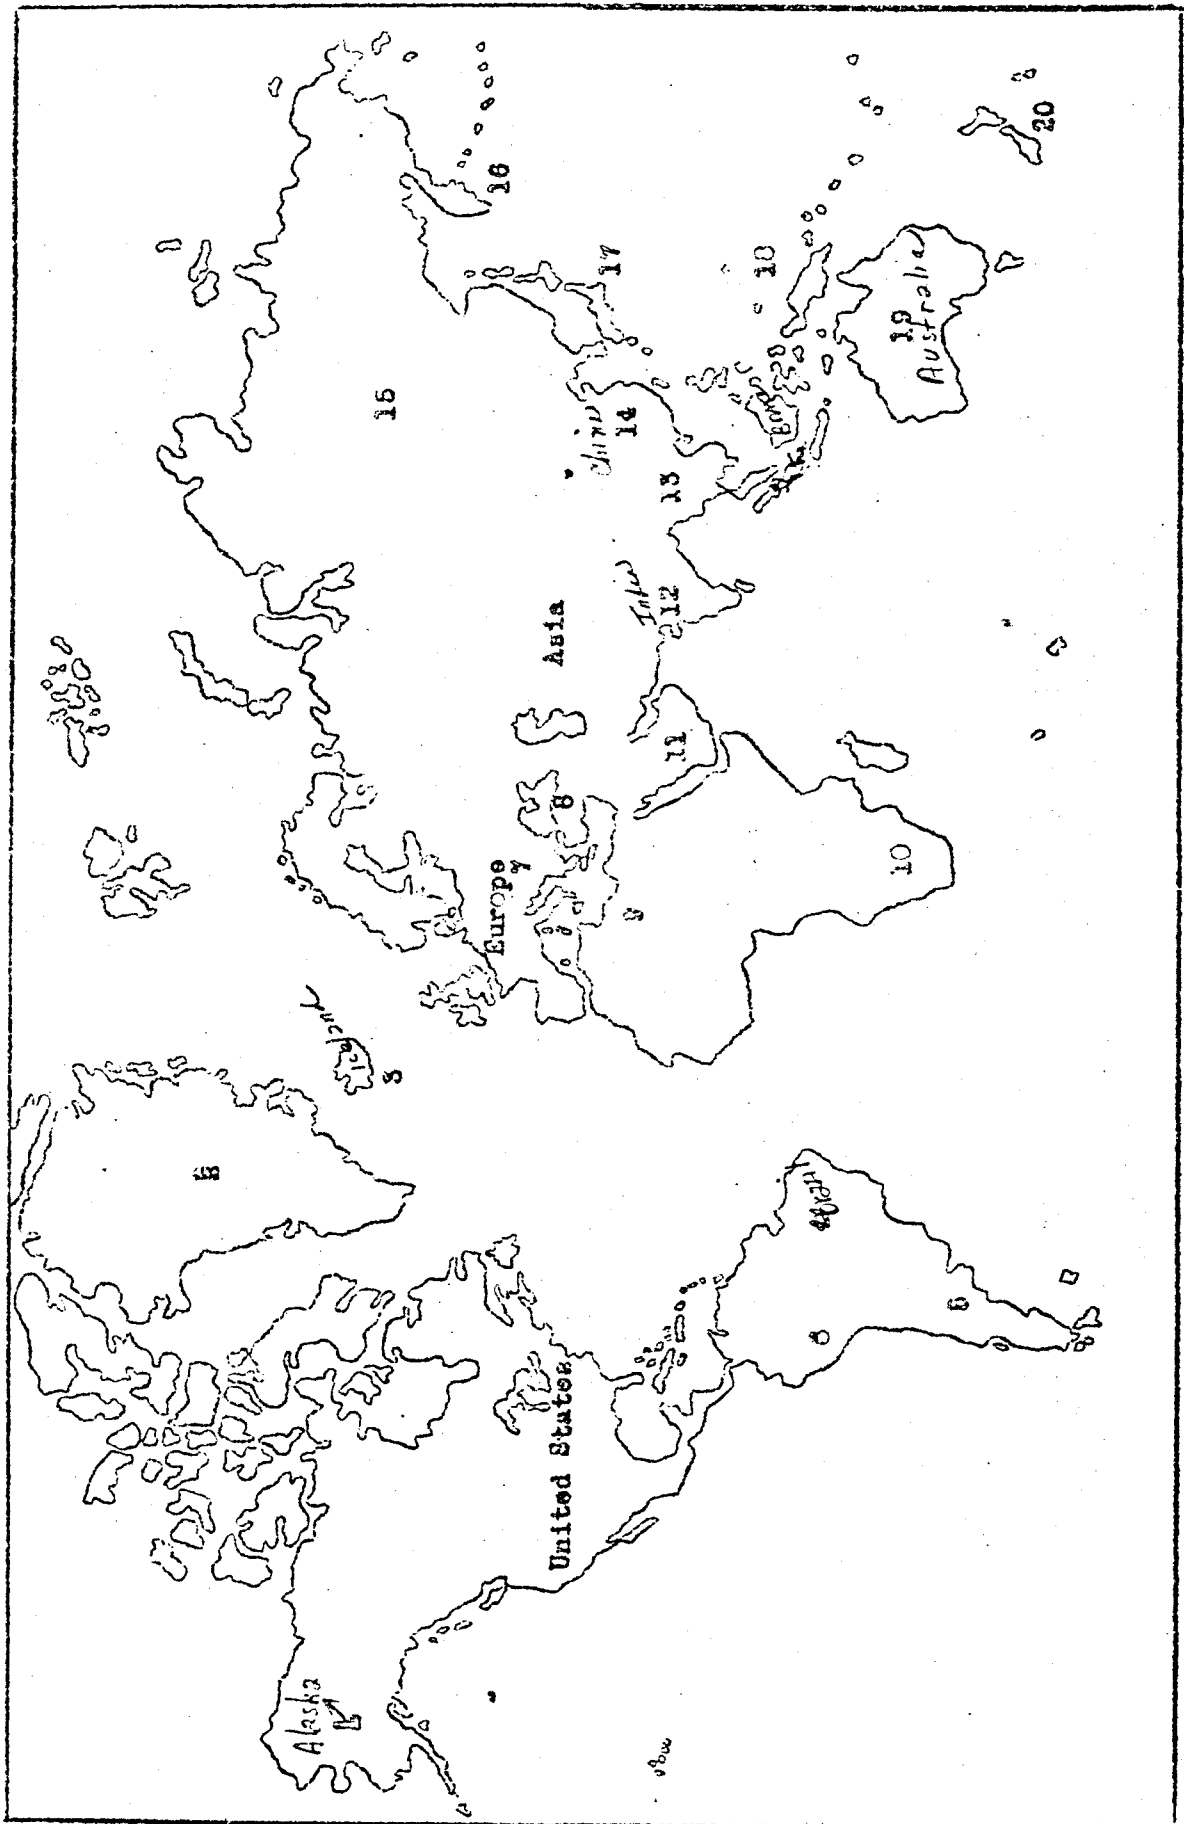

#813 - Question 14

VV - No Opinion, no comment  
XX - Words, but no Opinion

STAY OUT OF WORLD AFFAIRS

OO - Stay out, but no comment, -- "I don't know why"  
OX - Words, but no interpretation

Qualified Answers

- 01 - But we will probably be forced into world affairs - Stay out until we have to get in
- 02 - We shall have to take some part, but should stay out as much as we can
- 03 - Trade but no alliances
- 04 - Take an active part until war is settled, but keep out thereafter

Other

- 10 - Because we don't want any more trouble - We've had enough trouble already -- this war is something terrible - to keep out of trouble - to keep out of another war.
- 11 - The less we have to do with Europe the better -- "Let them stew in their own juice" -- "Mind our own business"
- 12 - We should make ourselves very powerful but mind our own business here
- 13 - We have enough to do over here
- 14 - We should have been peacemakers
- 15 - To maintain our traditional independence - We've always been a country apart from the others - we can be self-sufficient.

### Other

- 16 - If every country minded its own business there wouldn't be so many disputes - other countries should take care of themselves - if other nations don't - bother us, we shouldn't bother them.
- 17 - But we should protect ourselves from future recurrences of present events - if they can't keep peace we should interfere.
- 18 - I find that I individually get along better by not butting into things.
- 19 - But western hemisphere should be united. "Only take our share of the responsibility in this hemisphere"
- ✓20 - Keep out of their business; we pay for it
- 21 - We will be broke
- 22 - Unless we could get all nations to have governments like ours it would be no use

### Question 14

#### TAKE AN ACTIVE PART IN WORLD AFFAIRS

- 30 - No comment -- "I don't know why"
- 3X - Words, but no interpretation

#### We will have to take an active part in world affairs

- 40 - We can't avoid it -- the world is too small now for isolationism to work - no country can be self-sufficient - we are in now and can't get out - we can't live to ourselves.
- 41 - In the past we tried to stay out of world affairs and that proved to be the wrong thing - if we had taken an active part before we would probably not be having our present difficulties.
- 42 - It will be necessary for post-war reconstruction - to help rebuild world
- 43 - We are in now and we might as well stay in it and control it

### Economic Reasons

- 50 - Because we trade with the whole world - we need their trade - for business reasons - we have got to cooperate to do business
- 51 - We have so much money tied up in foreign countries.
- 52 - Because it would be to our advantage - to protect our own interests.
- To know what was going on and keep things on an even keel.
- 60 - To ensure future peace - to know what was going on - we should keep an eye on things - keep any more trouble from getting started - to try to keep down dictatorship - for our own protection
- 61 - It will be necessary for us (for England and U.S., for the Allies, etc.) to police the world - We have got to hold down Germany and Japan and make sure they never get a chance to rearm - If we're going to whip them, then we should police them.
- 62 - It is necessary for us to help keep a balance.

### It is our responsibility and our right to take an active part in world affairs

- 70 - It is going to be up to us to settle things - it is our responsibility - we are fighting the war (paying for the war) and we shall have some say in making the peace -- it is our duty.
- 71 - To keep people together - Can't expect rest of world to get along with us unless we take an interest in them - We have to be united or lost - other countries are depending on us. - To promote the brotherhood of man
- We are all citizens of the world - democracies should pull together
- 72 - Every country should do that - all countries must work together.
- 73 - We should take an active part to promote efficient world government
- 74 - To see that everyone gets a fair deal - the United Nations should insure freedom for the rest of the world - "Keep up to ideas of democracy"
- 75 - We should set a shining example for the rest of the world

### We should take a position of leadership in the world

- 80 - We should be a big power after the war - we are the richest and most powerful country and should have our say about the way things go.- must take a leading part



Question 14

- 81 - We are powerful enough and less selfish than most countries - we are the most civilized country.
- 82 - We should spread our democratic principles - we are the strongest democratic nation.
- 83 - We should push England out of the way and then we should have the say.
- 84 - English speaking people should dominate world.
- 85 - U.S. should lead the world - dominate all countries - U.S. will be the world power.
- 86 - We should be leader for our own protection
- 87 - We should keep peace for smaller nations
- 88 - We know more about such things than other countries
- 89 - To make other countries respect us we should take an active part

Other

- 90 - Settle all the problems that way
- 91 - We should take a small part but no more
- 92 - As far as commerce is concerned, but we should not join any sort of a league
- 93 - To improve the status of our country
- 94 - Provided we let all countries live their own way
- 95 - So we can be prepared for things like this and defend ourselves.  
"Remember Pearl Harbor. Be prepared."

#813 - Question 14

VY - No Opinion, no comment  
XX - Words, but no Opinion

STAY OUT OF WORLD AFFAIRS

00 - Stay out, but no comment, -- "I don't know why"  
01 - Words, but no interpretation

Qualified Answers

- 01 - But we will probably be forced into world affairs - Stay out until we have to get in
- 02 - We shall have to take some part, but should stay out as much as we can
- 03 - Trade but no alliances
- 04 - Take an active part until war is settled, but keep out thereafter

Other

- 10 - Because we don't want any more trouble - We've had enough trouble already -- this war is something terrible - to keep out of trouble - to keep out of another war.
- 11 - The less we have to do with Europe the better -- "Let them stew in their own juice" -- "Mind our own business"
- 12 - We should make ourselves very powerful but mind our own business here
- 13 - We have enough to do over here
- 14 - We should have been peacemakers
- 15 - To maintain our traditional independence - We've always been a country apart from the others - we can be self-sufficient.

### Other

- 16 - If every country minded its own business there wouldn't be so many disputes - other countries should take care of themselves - if other nations don't - bother us, we shouldn't bother them.
- 17 - But we should protect ourselves from future recurrences of present events - if they can't keep peace we should interfere.
- 18 - I find that I individually get along better by not butting into things.
- 19 - But western hemisphere should be united. "Only take our share of the responsibility in this hemisphere"
- 20 - Keep out of their business; we pay for it
- 21 - We will be broke
- 22 - Unless we could get all nations to have governments like ours it would be no use

### Question 14

#### TAKE AN ACTIVE PART IN WORLD AFFAIRS

- 30 - No comment -- "I don't know why"
- 3X - Words, but no interpretation

#### We will have to take an active part in world affairs

- 40 - We can't avoid it -- the world is too small now for isolationism to work - no country can be self-sufficient - we are in now and can't get out - we can't live to ourselves.
- 41 - In the past we tried to stay out of world affairs and that proved to be the wrong thing - if we had taken an active part before we would probably not be having our present difficulties.
- 42 - It will be necessary for post-war reconstruction - to help rebuild world
- 43 - We are in now and we might as well stay in it and control it

### Economic Reasons

- 50 - Because we trade with the whole world - we need their trade - for business reasons - we have got to cooperate to do business
- 51 - We have so much money tied up in foreign countries.
- 52 - Because it would be to our advantage - to protect our own interests.

### To know what was going on and keep things on an even keel.

- 60 - To ensure future peace - to know what was going on - we should keep an eye on things - keep any more trouble from getting started - to try to keep down dictatorship - for our own protection
- 61 - It will be necessary for us (for England and U.S., for the Allies, etc.) to police the world - We have got to hold down Germany and Japan and make sure they never get a chance to rear - If we're going to whip them, then we should police them.
- 62 - It is necessary for us to help keep a balance.

### It is our responsibility and our right to take an active part in world affairs

- 70 - It is going to be up to us to settle things - it is our responsibility - we are fighting the war (paying for the war) and we shall have some say in making the peace -- it is our duty.
- 71 - To keep people together - Can't expect rest of world to get along with us unless we take an interest in them - We have to be united or lost - other countries are depending on us. - To promote the brotherhood of man

We are all citizens of the world - democracies should pull together

- 72 - Every country should do that - all countries must work together.
- 73 - We should take an active part to promote efficient world government
- 74 - To see that everyone gets a fair deal - the United Nations should insure freedom for the rest of the world - "Keep up to ideas of democracy"
- 75 - We should set a shining example for the rest of the world

### We should take a position of leadership in the world

- 80 - We should be a big power after the war - we are the richest and most powerful country and should have our say about the way things go. - must take a leading part

Question 14

- 81 - We are powerful enough and less selfish than most countries - we are the most civilized country.
- 82 - We should spread our democratic principles - we are the strongest democratic nation.
- 83 - We should push England out of the way and then we should have the say.
- 84 - English speaking people should dominate world.
- 85 - U.S. should lead the world - dominate all countries - U.S. will be the world power.
- 86 - We should be leader for our own protection
- 87 - We should keep peace for smaller nations
- 88 - We know more about such things than other countries
- 89 - To make other countries respect us we should take an active part

Other

- 90 - Settle all the problems that way
- 91 - We should take a small part but no more
- 92 - As far as commerce is concerned, but we should not join any sort of a league
- 93 - To improve the status of our country
- 94 - Provided we let all countries live their own way
- 95 - So we can be prepared for things like this and defend ourselves.  
"Remember Pearl Harbor. Be prepared."

#313

Question 15a

- No Answer

0 - No Opinion - As they treat us - let government decide

1 - Treat them as ourselves - very kindly - the best we can - help them

2 - Treat them fairly - like human beings - same as anybody else - same as after last war - kindly - treat them all right - forgive them

3 - Don't punish them - treat them tolerantly - leniently - they are not to blame

4 - Help most of them - those not guilty - punish them but not harshly

5 - Treat them kindly but firmly (or vice versa)

6 - Re-educate them - train them in democracy - have to guide them

7 - Disarm them - keep them weak - watch them close

8 - Put them in their place - keep them in subjection - like conquered nation - ,Don't treat them very good

9 - Treat them harshly - give them a dose of their own medicine

X - Other

(Don't have anything to do with them

(Partitism Germany

(Won't be any left

(Scatter

(Let Russians handle it

(Give them whiskey and they'll destroy selves.

(Make work to pay for war!

V - Lock them up, shoot them, etc.

Question 15b

- No Answer

- 6 0 - No Opinion, etc., obscure answers
- 3 1 - forgive them - treat them all right
- 3 2 - Keep them under control
- 7 3 - Punish them - hold them responsible - Court marshall them - give them a fair trial
- 6 4 - Isolate them - exile them
- 6 5 - Treat them harshly - give them a dose of their own medicine - punish them severely
- 17 6 - Imprison them - intern them - lock them up
- 40 7 - Kill them - get rid of them - liquidate them
- 3 8 - Torture them
- 4 X - Other (Same sort of thing as 'cther' for the people)  
(won't be any left-- make them appreciate us)
- 3 9 - Depose them - take away their power

#813

Question "16"

~~Answers~~

VV - No Opinion, no comment  
XX - No Opinion, but some remarks

"Yes" answers

- 00 - Yes, no comment
- 0X - Yes, remarks, but no reason, -- "I think we can trust them"
- 01 - Russia will be all right for a while, but watch out if she gets too powerful
- 03 - Sentimental reasons:
  - Because they are fighting for their homes and land -- Because they are for the poor man -- because they are having a tough time now and will be friendly after the war -- because they are friendly to us -- want to help us
- 04 - We've been on good terms with Russia so far
- 05 - Because Russia is O.K. -- a great country
- 06 - Because the communists are O.K.
- 07 - Because we are both fighting on the same side - she is on our side
- 08 - They will cooperate with us because we are helping them (fighting not specified)
- 09 - Yes, if we cooperate with Russia
- 10 - Our aims are compatible with Russia's -- they have enough territory and don't want more
- 11 - Russia is becoming civilized and giving up Bolshevism -- Russia is becoming more democratic - their ideals are like ours
- 12 - It is to Russia's interest to cooperate with us - they won't be able to do anything else -- they'll need our power to make peace
- 13 - Russia can be trusted farther than some of the warring nations
- 14 - Yes, but Russia hasn't been friendly to us until she was forced to be by the war
- 15 - All nations will have to cooperate after this war
- 16 - Stalin is a responsible leader
- 17 - Scientific reasons
- 18 - Friendship based on trade
- 19 They've learned their lesson.
- 20 - Yes, if we win the war



#813

Question 16

"No" answers

- 50 - No, no comment
- 5X - No, remarks but no reasons -- "I don't trust them a bit"
- 51 - They have a different kind of government from ours -- you can't depend on their government -- too much dictatorship -- you can't trust any dictator
- 52 - They are heels:  
They are treacherous by nature -- they shot their generals - - they cannot be trusted any more than Germany or Japan
- 53 - They are unreliable:  
They couldn't be trusted before the war -- they don't keep their promises -- they were allied with Germany -- they might double-cross us, Russia hasn't formally admitted being our ally
- 54 - They have been on unfriendly terms with us in the past -- they didn't cooperate with us before the war -- they have stirred up trouble here
- 55 - They are communists (and cannot be trusted) -- they have radical ideas -- they are fanatics
- 56 - We can't trust Stalin -- can't trust their leader
- 57 - They are irreligious -- not Christians
- 58 - They want more territory - more power - Stalin would like to rule more countries
- 59 - Russia will try to conquer the world if she thinks she can
- 60 - Their aims (economic system) will conflict with ours
- 61 - They are interested solely in what will benefit them and don't care about anyone else
- 62 - We can tolerate them but not trust them
- 64 - You can't trust anyone -- "I'm not/trusting kind"
- 65 - Our aims are similar but divergent-- no real basis for cooperation
- 66 - They will try to start a (communist) revolution over here
- 67 - They are our enemy
- 68 - They are too ignorant
- 69 - Not cooperating now

813

Question 18a

- No Answer

- 20 0 None, no, don't know of any
- 33 1 Yes, some
- 13 2 Labor leaders, unions, labor, factory workers
- 1 3 Farmers
- 4 4 Politicians, government
- 15 5 Business, industry, capital
- 2 6 Rich people
- 2 7 Jews
- 1 8 Foreign-born (whatever the nationality)
- 1 9 Storekeepers (people raising prices)
- 1 V Other (Bund, Coughlin, K.K.K., etc.)
- 7 X Don't know, no opinion, can't think of any right now

Question 18b - 813

DO YOU THINK ANY OF THESE GROUPS ARE TAKING UNFAIR ADVANTAGE OF THE WAR TO GET MONEY OR POWER FOR THEMSELVES?

|    |                 |    |                     |
|----|-----------------|----|---------------------|
| 9  | 1. Farmers      | 11 | 7. People on relief |
| 2  | 2. Negroes      | 21 | 8. Factory workers  |
| 19 | 3. Jews         | 72 | 9. Labor leaders    |
| 12 | 4. Foreign-born | 25 | 10. Congressmen     |
| 1  | 5. Protestants  | 35 | 11. Business men    |
| 2  | 6. Catholics    | 31 | 12. Wealthy people  |

21. 100% of the people

1. 100% of the people

9. 100% of the people

\* 100% of the people

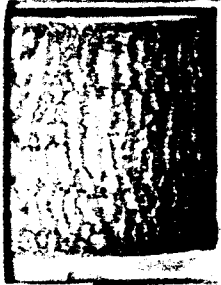

#813

Qualified Answers  
Questions 19, 21, and 25a

Question 19

0 -- No Answer

1 -- Yes, most can -- the majority can -- most Americans can -- all  
except \_\_\_\_\_ can be trusted

2 -- No ---there are a lot thatcan't -- not too far

3 -- Some can, some can't --- \_\_\_\_\_ can't be trusted

4 -- No Opinion

Question 21

0 -- No Answer

1 -- Jobs for everyone

2 -- Lots of unemployment

3 -- Qualified answer , no comment --

4 -- No Opinion -- "It all depends on -----"

5 -- Some unemployment, but not a great deal

6 -- A lot of work for a while, but then a depression

7 -- Unemployment for a while, but then recovery -- adjustments to be made,  
but all right after that

8 -- There will be economic difficulties, but I trust the president (the Govt.)  
to find a solution

9 -- There will be work, but we'll have a different economic system

V -- Vague answers: "Some of each," -- "Employment for a certain length of time"  
No illumination

X -- Other qualified answers

#813

Question 25 a, ▶

- 0 -- No Answer
- 1 -- Yes
- 2 -- No
- 3 -- Qualified answer: "I'm doing what I can", -- "I'm doing \_\_\_\_\_,  
but I don't know if it is important" etc. etc.

Question 25b

- 0 -- Civilian defense program, defense stamps and bonds, saving materials, Red Cross
- 1 -- Serving in armed forces
- 2 -- Working in war industry, or as a civilian for armed forces -- Professional capacity for draft boards
- 3 -- Governmental administrative work, part or full time - draft board member - blood supplier
- 4 -- Reducing purchases and consumption
- 5 -- Raising farm products, (farm women)
- 6 -- Psychological and ideological work, morale building, spreading democracy, religion
- 7 -- Helping husband or family member who is doing something on the list
- 8 -- USO, or other work with soldiers of an entertainment or social service variety
- 9 -- Home guard, rifle practice, or other military training, R.O.T.C.
- V -- Training for non-military war work (including students who are training for war work)
- X -- Working at usual job, just working, being good citizen, knitting, taking care of family -- "I'm giving a son to my country."
- Sp-- No Answer

#813

Question 23b

0 -- "No" or "No answer on 28a, no materials mentioned

X -- "Yes" on 28a, but no materials mentioned

1 -- Metal

2 -- Rubber

3 -- Paper, (Cloth, fabrics)

4 -- Metal and rubber

5 -- Metal and paper

6 -- Rubber and paper

7 -- Metal, rubber and paper

8 -- Clothing

9 -- Other materials

V -- Everything, lots of things, etc.

#813

Question 29

VV - No Opinion, no comment  
XX - Words, but no opinion

Yes Answers

- 00 - Yes, no comment
- 0X - Yes, remarks but no illumination of answer -- "I think they should have the power" -- "I don't know"
- 01 - The Government knows best what should be done - government knows more than we do -- government needs complete authority -- we should do what the government tells us to do
- 02 - In time of war the government should have complete authority -- someone has to tell everybody what to do in an emergency like this -- to help win the war -- it is necessary if we are to win the war - it should be an all-out war -- that's the way we'll get results -- if we must use force, we might as well-- national interest comes ahead of personal wishes - we need leadership and organization
- 04 - Some people won't take part unless they are required
- 03 - Everyone should take part - everybody would be doing something to help -- for unity -- lots of us don't know what to do - everybody would know what he should do - that's what most people are waiting for
- 05 - People could be put where they are most needed - could do the work they were best at
- 06 - Both business and labor should be drafted - should draft all civilians -- since they're drafting boys for the army this would only be fair
- 07 - Would be the fair thing to do - the democratic thing to do
- 08 - Yes, although it sounds like dictatorship
- 09 - Absolutely - by all means - the sooner the better

Qualified "Yes" Answers

- 10 - If Necessary
- 11 - To a certain extent
- 12 - Provided that everyone does his part - provided everyone is treated alike
- 13 - If we are attacked on our own soil - if the worst comes - if things get serious enough
- 14 - If a man doesn't have other responsibilities he should be required
- 15 - Providing he gets paid for it (it's awfully hard to make a living right now)
- 16 - So long as the power is held by a board, not one man

# 813

Question 29

- 17 - Providing a person can say where he thinks he should be put and be given a hearing -- provided people are fitted in according to their qualifications
- 18 - Provided it is for the war effort
- 19 - Provided it can be kept out of politics
- 30 - Would be O.K. if one man could be responsible for each division of the defense plan
- 31 - But only for the duration
- 32 - Providing it is well organized - is handled fairly and reasonably
- 33 - If can't get workers on a voluntary basis
- 34 - If (they) are able to do it - if physically fit and services are needed
- 35 - If it won't affect his home life too much
- 36 - Providing they are not already doing defense work

Other "Yes Answers

- 20 - Should put the matter before the people
- 21 - If the government tells you to do it you have to do it
- 22 - Women should be made to do more
- 23 - After a certain age
- 24 - Proved successful in England - "They've got to help in other countries, why shouldn't we?"
- 25 - Government does have that power

No Answers

- 50 - No, no comment
- 5X - No, remarks, but no illumination of answers -- "I don't know" -- "No, that wouldn't be good"
- 51 - American citizens should not be dictated to -- too much like dictatorship - would be like Hitler -- like the Axis --



#813

Question 29

- 52 - Should have same freedom as we have now - we are fighting for freedom -- this is a free country
- 53 - If left alone people will do whatever they can - leave it up to the people individually -- let people volunteer - should be on voluntary basis
- 54 - Might cause trouble - lots of people hate to be driven -- people should suit themselves - it wouldn't work - might be inconvenient for some people
- 55 - Should not require or compell people, but should suggest as a patriotic duty -- "Each case should be treated on its merits."
- 56 - It would be undemocratic, unfair
- 57 - It would be communistic - socialistic
- 58 - It would give the government too much power -- too much to do
- 59 - There would be lots of graft -- too much politics
- 60 - We are not that far yet -- only as a last resort -- isn't necessary right now - not necessary -- too drastic - etc.
- 61 - Not unless they get short of labor
- 62 - Not unless we are invaded
- 63 - Not unless it is necessary - not unless they refuse to work
- 64 - Not if it's going to take them away from their jobs -- from their families
- 65 - Some people should be told
- 66 - Make aliens work, not citizens
- 67 - Not if they're helping as much as they can already
- 68 - Should not draft women
- 69 - People are sacrificing enough already
- 70 - Some people aren't physically able to work
- 71 - Not with the present administration

Ballot 813 - Nationality

2 columns- 1st column- Father's nationality  
2nd column- Mother's nationality

1. U.S.
2. England, Scotland and Wales
3. Canada and Australia
4. Ireland
5. France
6. Germany
7. Italy
8. Russia
9. Finland, Hungary and Spain
0. Switzerland, Sweden, Portugal
- X. Others
- V. Occupied
- Sp. No answer

#813

Place of Interview

- 0 No answer
- 1 Respondent's home, front porch, back yard, barn - friend's home
- 2 Place where respondent works (office, store, etc.)
- 3 Street, park, steps of a building
- 4 Place of business where respondent does not work (store, barber shop, etc.)
- 5 Restaurant, cafe, bar
- 6 Hotel, club, lounge, recreation room
- 7 Car, train, bus
- 8 Interviewer's home or office
- 9 At a meeting, assembly, church
- X Other

**PRINCETON UNIVERSITY  
OFFICE OF PUBLIC OPINION RESEARCH**

1. Which do you think is our No. 1 enemy in the war—Japan or Germany?  
1. ☐ Japan      2. ☐ Germany      3. ☐ Both      4. ☐ No Opinion

2a. Do you think we are now doing all we can to defeat Japan and Germany, or could we be doing more?  
5. ☐ Doing all we can      6. ☐ Could be doing more      7. ☐ No Opinion

If "Could be doing more" ask:

b. What more could we be doing? .....  
.....  
.....

3. Which of these two things do you think the United States should do:

1. ☐ Send most of our army abroad to fight the enemy wherever they are, or

2. ☐ Keep most of our army at home to protect the United States?

3. ☐ Qualified answer .....  
..... 4. ☐ No Opinion

4. Do you think the government is giving the public as much information as it should about the war?

☐ Yes      ☐ No      ☐ Too much      ☐ No Opinion

Comment .....  
.....

5. Which do you think has the smartest military leaders at present—Germany or Russia or the United States?

1. ☐ Germany      2. ☐ Russia      3. ☐ United States      4. ☐ No Opinion

6. Which do you think has the strongest navy at present—Japan or England or the United States?

5. ☐ Japan      6. ☐ England      7. ☐ United States      8. ☐ No Opinion

7. If Hitler offered peace now to all countries on the basis of not going farther, but of leaving matters as they are now, would you favor or oppose such a peace?

1. ☐ Favor      2. ☐ Oppose      3. ☐ No Opinion

8. Do you think the British are doing all they possibly can to win the war?

4. ☐ Yes      5. ☐ No      6. ☐ No Opinion

9a. Do you feel that you have a clear idea of what the war is all about?

☐ Yes      ☐ No      ☐ Qualified answer .....

If "Yes" or a qualified answer, ask:

b. Briefly, what would you say the war IS all about? .....  
.....  
.....

10. About how much longer do you think the war will last? ..... ☐ No Opinion  
(Please record in terms of years and months)

11. What will bring the war to an end?.....  
.....  
.....

12a. Do you think that if Germany and Japan should win this war they would keep their armies over here to police the United States?

1. ☐ Yes      2. ☐ No      3. ☐ They won't win      4. ☐ No Opinion

If "No" ask:

b. Why not? .....  
.....

**HAVE YOU CHECKED ANSWERS ON EACH QUESTION?**

13. (HAND MAP TO RESPONDENT) Here is a map of the world. (MAKE SURE THAT RESPONDENT UNDERSTANDS WHERE THE UNITED STATES, EUROPE, AND ASIA ARE ON THE MAP)

a. Can you find Alaska on the map and tell me the number there?

..... Number

☐ Don't know

d. Brazil?

..... Number

☐ Don't know

b. Can you find Australia?

..... Number

☐ Don't know

e. Iceland?

..... Number

☐ Don't know

c. China?

..... Number

☐ Don't know

f. India?

..... Number

☐ Don't know

☐ Can't understand map

14. Which of these two things do you think the United States should try to do when the war is over:

☐ Stay out of world affairs as much as we can, or

☐ Take an active part in world affairs?

☐ No Opinion

MAIN REASON .....

15a. If we win the war, how do you think we should treat the people in Germany? .....

b. How should we treat the Nazi leaders? .....

16. Do you think Russia can be trusted to cooperate with us after the war is over?

☐ Yes

☐ No

☐ No Opinion

MAIN REASON .....

17. As you know, a lot of new government offices have been set up in Washington especially to deal with national defense and war problems. From what you have heard, do you think most of these offices are doing a good job, or a poor one?

1. ☐ Good job

2. ☐ Poor job

3. ☐ Fair job

4. ☐ Doing the best they can

5. ☐ No Opinion

18a. Are there any people or groups here in the United States that you think are taking unfair advantage of the war to get money or power for themselves? .....

☐ None

b. (HAND CARD TO RESPONDENT) Do you think any of these groups are taking unfair advantage of the war to get money or power for themselves?

1. ☐ Farmers

5. ☐ Protestants

9. ☐ Labor leaders

2. ☐ Negroes

6. ☐ Catholics

10. ☐ Congressmen

3. ☐ Jews

7. ☐ People on relief

11. ☐ Business men

4. ☐ Foreign-born

8. ☐ Factory workers

12. ☐ Wealthy people

1. ☐ None of these groups

2. ☐ Can't read

3. ☐ No Opinion

19. Do you think most people can be trusted?

1. ☐ Yes

2. ☐ No

3. ☐ Qualified answer.....

4. ☐ No Opinion

20. Do you think success is dependent mostly on luck, on ability, or on pull?

5. ☐ Luck

6. ☐ Ability

7. ☐ Pull

8. ☐ No Opinion

21. After the war is over, do you think there will be jobs for everyone or lots of unemployment?

1. ☐ Jobs for everyone

2. ☐ Lots of unemployment

3. ☐ Qualified answer.....

4. ☐ No Opinion

22a. Do you have any children?

☐ Yes

☐ No

If "Yes" on a, ask:

b. Do you think your children twenty years from now will be better off or worse off than you are now?

1. ☐ Better

2. ☐ Worse

3. ☐ Same

4. ☐ No Opinion

If "No" on a, say:

c. Well, suppose you had some children. Do you think that if you had some children they would be better off or worse off twenty years from now than you are now?

5. ☐ Better

6. ☐ Worse

7. ☐ Same

8. ☐ No Opinion

HAVE YOU CHECKED ANSWERS ON EACH QUESTION?

23. Do you think a poor man gets just as fair treatment in the law courts as a rich man?  
1. ☐ Yes 2. ☐ No 3. ☐ No Opinion

24. In general, do you approve or disapprove of the way Roosevelt is handling his job as President today?  
4. ☐ Approve 5. ☐ Disapprove 6. ☐ No Opinion

25a. Do you feel that you personally are doing something that is important in helping to win the war?  
1. ☐ Yes 2. ☐ No 3. ☐ Qualified answer.....

.....  
If "Yes" or a qualified answer, ask:

b. What sort of thing are you doing? .....

26. Are you doing any work in the civilian defense program such as air raid warning, first aid, and the like?  
1. ☐ Yes 2. ☐ No 3. ☐ No, but signed up

27. Have you or your family bought any defense bonds or defense stamps?  
4. ☐ Yes 5. ☐ No

28a. Are you or your family saving materials such as metal, rubber, or waste paper?

☐ Yes ☐ No

If "Yes," ask:

b. What materials are you saving? .....

29. After finding out what each person can do, should the government have the power to tell each citizen what to do as his part in the war effort, and require him or her to do it?

☐ Yes ☐ No ☐ No Opinion

COMMENT .....

30a. Do you remember FOR CERTAIN whether or not you voted in the 1940 Presidential election?  
1. ☐ Yes, voted 2. ☐ No, didn't vote 3. ☐ No, too young to vote

If "Yes," ask:

b. Did you vote for Willkie, Roosevelt, or Thomas?

4. ☐ Willkie 5. ☐ Roosevelt 6. ☐ Thomas 7. ☐ Other.....

31. Are you a member of a church?  
☐ Yes Which denomination? ..... ☐ No

32. In what country were your parents born? Father..... Mother .....

33a. Do you remember the name of the last school you attended? .....

b. How far did you go in that school? ☐ No schooling

1. ☐ Grammar school, incomplete 4. ☐ High school, graduated

2. ☐ Grammar school, graduated 5. ☐ College, incomplete

3. ☐ High school, incomplete 6. ☐ College, graduated

☐ Other .....

☐ Wealthy ☐ AV ☐ P ☐ OR-WPA ☐ Car ☐ Man ☐ Wh  
☐ AV+ ☐ OAA ☐ OR-Home Relief ☐ No Car ☐ Woman ☐ Cl.

SPECIFIC OCCUPATION ..... ESTIMATE AGE .....

STREET ..... CITY .....

Is there a telephone in your home (place where you live)? ☐ Yes ☐ No

If "Yes", ask: Is the telephone listed either under your name or the name of a member of your immediate family? ☐ Yes ☐ No

Place of interview: ☐ Home ☐ Office ☐ Street ☐ Other .....

Interviewer .....

Date this interview was made .....

HAVE YOU CHECKED ANSWERS ON EACH QUESTION  
AND ALL VITAL INFORMATION?

PRINCETON UNIVERSITY  
OFFICE OF PUBLIC OPINION RESEARCH  
RECORD OF REFUSALS AND INCOMPLETED INTERVIEWS

1. Reporter's opening remark: .....

Respondent's answer: .....

2. "Which do you think is our No. 1 enemy in the war—Japan or Germany?" (Question 1 on ballot)

Respondent's answer: .....

3. Any other remarks: .....

4. Reason for termination of interview: .....

☐ Wealthy   ☐ AV   ☐ On Relief   ☐ Man   ☐ Wh   Nationality: \_\_\_\_\_  
☐ AV+   ☐ P   ☐ OAA   ☐ Woman   ☐ CI   \_\_\_\_\_

OCCUPATION \_\_\_\_\_ ESTIMATE AGE \_\_\_\_\_

(Fill in the most likely estimates on the basis of what you can observe)

Place of interview:   ☐ Home   ☐ Office   ☐ Street   ☐ Other .....

STREET \_\_\_\_\_ CITY \_\_\_\_\_

Reporter \_\_\_\_\_ Date of interview \_\_\_\_\_

PRINCETON UNIVERSITY STUDY -- BULLETIN - 813

ABOUT THIS STUDY:

The enclosed study is sponsored by the Princeton University Public Opinion Research Project of which Dr. Hadley Cantril is director.

As this is quite a long ballot, it will require your best interviewing efforts. The purpose of this longer ballot is to make a complete and comprehensive study of people's attitudes toward the present world situation.

"REFUSALS AND INCOMPLETED INTERVIEWS": The enclosed letter from Dr. Cantril explains the purpose of the sheets labeled "Record Sheets for Refusals and Incompleted Interviews." We would like to explain once again that you should send us information (either a completed interview or a record sheet) for each person APPROACHED on this survey.

We cannot give you any idea how many of these you should expect since our experience in testing this ballot here varied greatly between individual interviewers. We do wish you to understand, however, that the number of refusals or incompleted interviews you return will in no way reflect on the quality of your interviewing.

TIME LIMIT:

The enclosed assignment must be completed and in the mails not later than FOUR DAYS after your receipt of it. If you or a reliable substitute will not be able to meet this mailing deadline, please wire us night letter collect IMMEDIATELY.

PLEASE LOOK AT A BALLOT:

QUESTION 11: The purpose of this question is to find out which side the respondent thinks will win the war. If you receive any answers such as: "when somebody is defeated" or "a peace treaty, I suppose," it will be necessary for you to do additional probing to find out who the respondent thinks will win.

QUESTION 13: You may find some people feel reluctant to try to locate the places asked for on the map because they are not adequately informed about geography to answer. Our experience, however, has been that once started, they lose their self-consciousness and enjoy it. We urge you, therefore, to do your very best to get everyone to try to find the places listed.

QUESTION 18: As you can see, the "a" part of this question asks for a spontaneous answer. Regardless of what the respondent says in answer to the "a" part -- that is whether he names several groups or is unable to name any -- you then hand him the card and read the question again. If he selects any of the groups from the card, please check the corresponding answer boxes under "b".

QUESTIONS 26, 27, 28: If in reply to Question 25b, the respondent mentions work in the civilian defense program, you would obviously not ask Question 26 but simply mark the "yes" answer box. If he mentions buying defense bonds or stamps, you would simply mark the "yes" answer on Question 27. If he mentions saving materials such as metal, rubber, or waste paper, you would not ask Question 28, but would check "yes" on the "a" part and record the materials named under "b".

INTERVIEWER'S BALLOT: We are enclosing an Interviewer's Ballot on which we wish you to record your personal opinions.

ALL INTERVIEWING WHICH YOU DO FOR PUBLIC OPINION SURVEYS, INC. IS CONFIDENTIAL!  
Public Opinion Surveys, Inc.  
Interview Department
